# Supplementary material for: Chiral Lewis acid-bonded picolinaldehyde enables enantiodivergent carbonyl catalysis in the Mannich/condensation reaction of glycine ester
Source: Royal Society of Chemistry journal article supplement (doi:10.1039/d0sc07052a), 2021-01-01

## **Chiral Lewis Acid-Bonded Picolinaldehyde Enables Enantiodivergent Carbonyl Catalysis in Mannich/Condensation Reaction of Glycine Ester**

Xia Zhong, Ziwei Zhong, Zhikun Wu, Zhen Ye, Yuxiang Feng, Shunxi Dong, Xiaohua Liu, \* Qian Peng \* and Xiaoming Feng \*

---

## Table of Contents

|     |                                                                                                           |     |
|-----|-----------------------------------------------------------------------------------------------------------|-----|
| (A) | General Information.....                                                                                  | 3   |
| (B) | Characterization of <i>N,N'</i> -Dioxide Ligands .....                                                    | 3   |
| (C) | General Procedure for the Catalytic Asymmetric Cascade Mannich/condensation Reaction.....                 | 3   |
| (D) | Optimization of Conditions.....                                                                           | 4   |
| (E) | X-ray Crystal Structure of Product <b>3n</b> and <i>N,N'</i> -Dioxide/Yb(OTf) <sub>3</sub> Complexes..... | 11  |
| (F) | Experimental Procedure for the Scale-up Reaction and Transformations of the Products.....                 | 15  |
| (G) | Procedure for React IR Experiment for Kinetic Studies.....                                                | 19  |
| (H) | Control Experiments and HRMS Analysis.....                                                                | 22  |
| (I) | IR Analysis and Deuterium Labeling Experiment.....                                                        | 28  |
| (J) | HRMS Analysis.....                                                                                        | 30  |
| (K) | Computational Details .....                                                                               | 30  |
| (L) | References.....                                                                                           | 55  |
| (M) | The Analytical and Spectral Characterization Data of the Products.....                                    | 56  |
| (N) | Copies of NMR Spectra.....                                                                                | 75  |
| (O) | Copies of CD Spectra in CH <sub>2</sub> Cl <sub>2</sub> .....                                             | 123 |

## (A) General Information

CH<sub>2</sub>Cl<sub>2</sub>, CH<sub>2</sub>ClCH<sub>2</sub>Cl, EtOAc, MeOAc, *n*PrOAc, MeCN were freshly distilled from CaH<sub>2</sub> prior to use; THF, toluene, Et<sub>2</sub>O were freshly distilled from sodium metal prior to use; alcohols were freshly distilled from magnesium metal/I<sub>2</sub> prior to use; aldehydes and amines were distilled or recrystallized to use. <sup>1</sup>H NMR spectra were recorded on bruker ASCEND™ operating at 400 MHz. The chemical shifts were recorded in ppm relative to tetramethylsilane and with the solvent resonance as the internal standard. Data were reported as follows: chemical shift, multiplicity (s = singlet, d = doublet, t = triplet, m = multiplet, q = quartet), coupling constants (Hz), integration. <sup>13</sup>C{<sup>1</sup>H} NMR data were collected bruker ASCEND™ operating at 101 MHz with complete proton decoupling. <sup>19</sup>F{<sup>1</sup>H} NMR was collected bruker ASCEND™ operating at 376 MHz with complete proton decoupling. Metal salts obtained from commercial sources were used without further purification. Enantiomeric excesses were determined by HPLC analysis on Daicel Chiralcel IA/IB/IC/IF/IG/IH/ASH in comparison with the authentic racemates. Optical rotations were reported as follows: [α]<sub>D</sub><sup>T</sup> (c = g/100 mL, in solvent, unless otherwise noted, λ = 436 nm). HRMS was recorded on Thermo Q-Exactive Focus (FTMS+c ESI) and data were reported as (m/z). The chiral *N,N'*-dioxide ligands were synthesized by the same procedure in the literature.<sup>1</sup> The imine compounds were prepared according to the literature.<sup>2</sup> Amino acid ester hydrochlorides were commercial reagent and recrystallized from MeOH/CH<sub>2</sub>Cl<sub>2</sub>. Unless noted, other commercial reagents were used without further purification.

## (B) Characterization of *N,N'*-Dioxide Ligands

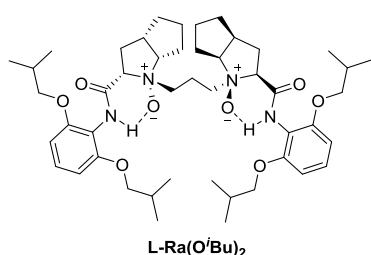

**L-Ra(OiBu)<sub>2</sub>** White solid; R<sub>f</sub> = 0.3 (ethyl acetate/methanol = 10/1). [α]<sub>D</sub><sup>27</sup> = -24.3 (c = 0.54, in tetrahydrofuran, λ = 365 nm); **m.p.**: 107.6 – 116.8 °C; <sup>1</sup>H NMR (400 MHz, CDCl<sub>3</sub>) δ 12.37 (s, 2H), 7.12 – 7.05 (m, 2H), 6.52 – 6.46 (m, 4H), 3.99 – 3.92 (m, 2H), 3.85 – 3.78 (m, 2H), 3.71 – 3.61 (m, 10H), 3.25 – 3.14 (m, 2H), 2.79 – 2.66 (m, 4H), 2.64 – 2.53 (m, 4H), 2.47 – 2.35 (m, 2H), 2.05 – 1.96 (m, 6H), 1.76 – 1.57 (m, 8H), 0.97 (d, J = 6.8, 1.3 Hz, 24H) ppm; <sup>13</sup>C{<sup>1</sup>H} NMR (101 MHz, CDCl<sub>3</sub>) δ 165.3, 155.0, 127.2, 114.0, 104.7, 83.4, 81.1, 74.7, 65.7, 42.5, 34.9, 32.3, 28.4, 27.9, 27.0, 19.4 ppm; **IR (neat) ν (cm<sup>-1</sup>):** 2953, 2359, 1680, 1592, 1527, 1459, 1393, 1257, 1097, 952, 752, 720, 650; **HRMS (ESI-FT) calcd for C<sub>47</sub>H<sub>73</sub>N<sub>4</sub>O<sub>8</sub><sup>+</sup> ([M]+H<sup>+</sup>) = 821.5423, found 821.5416.**

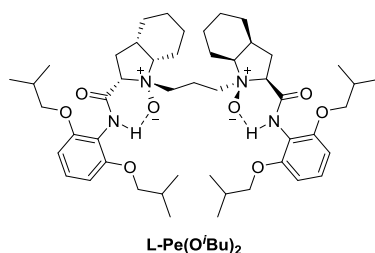

**L-Pe(OiBu)<sub>2</sub>** White solid; R<sub>f</sub> = 0.3 (ethyl acetate/methanol = 10/1). [α]<sub>D</sub><sup>23</sup> = -18.4 (c = 0.32, in tetrahydrofuran, λ = 365 nm); **m.p.**: 89.0 – 97.8 °C; <sup>1</sup>H NMR (400 MHz, CDCl<sub>3</sub>) δ 12.67 (s, 1H), 7.10 – 7.05 (m, 2H), 6.52 – 6.49 (m, 4H), 3.72 (d, J = 6.4 Hz, 8H), 3.66 – 3.55 (m, 4H), 3.41 – 3.30 (m, 2H), 2.63 – 2.54 (m, 2H), 2.44 – 2.29 (m, 4H), 2.24 – 2.13 (m, 4H), 2.07 – 2.01 (m, 4H), 1.84 – 1.76 (m, 4H), 1.70 – 1.60 (m Hz, 4H), 1.28 – 1.22 (m, 4H), 1.00 (dd, J = 6.8, 1.6 Hz, 24H), 0.96 – 0.92 (m, 4H) ppm; <sup>13</sup>C{<sup>1</sup>H} NMR (101 MHz, CDCl<sub>3</sub>) δ 166.5, 154.9, 127.0, 114.1, 104.7, 74.9, 74.0, 63.9, 34.5, 33.9, 28.4, 28.3, 21.1, 20.7, 20.1, 19.8, 19.4, 19.3 ppm; **IR (neat) ν (cm<sup>-1</sup>):** 2954, 2336, 1682, 1596, 1529, 1464, 1392, 1255, 1102, 719, 594; **HRMS (ESI-FT) calcd for C<sub>49</sub>H<sub>77</sub>N<sub>4</sub>O<sub>8</sub><sup>+</sup> ([M]+H<sup>+</sup>) = 849.5736, found 849.5745.**

## (C) General Procedure for the Catalytic Asymmetric Cascade Mannich/condensation Reaction

### 1 Typical procedure for the asymmetric cascade Mannich/condensation reaction

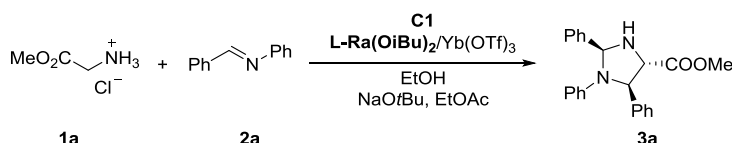

**Procedure A:** The reaction was conducted with Yb(OTf)<sub>3</sub> (6.2 mg, 10 mol%), **L-Ra(OiBu)<sub>2</sub>** (8.2 mg, 10 mol%), NaOtBu (9.6 mg, 0.10 mmol), methyl glycine hydrochloride **1a** (12.6 mg, 0.10 mmol), and EtOH (5.0 μL). Picolinaldehyde (**C1**, 2.0 μL, 20 mol%) and EtOAc (0.60 mL) were added in succession. The mixture was stirred at 35 °C for 15 min, and imine **2a** (54.0 mg, 0.30 mmol) was added at 35 °C. The resulting mixture was stirred at 35 °C for 48 hours. The reaction mixture was subjected to column chromatography on silica gel and eluted with petroleum ether/ethyl acetate (10/1 to 6/1, v/v) to afford the corresponding product **3a**.

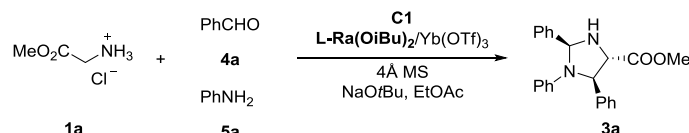

**Procedure B:** The reaction was conducted with Yb(OTf)<sub>3</sub> (6.2 mg, 10 mol%), **L-Ra(OiBu)<sub>2</sub>** (8.2 mg, 10 mol%), NaOtBu (9.6 mg, 0.10 mmol), methyl glycine hydrochloride **1a** (12.6 mg, 0.10 mmol), and 4Å MS (20 mg). Picolinaldehyde (**C1**, 2.0 μL, 20 mol%) and EtOAc (0.60 mL) were added in succession. The mixture was stirred at 35 °C for 15 min, and aldehyde **4** (0.30 mmol), amine **5** (0.30 mmol) were added at 35 °C. The resulting mixture was stirred at 35 °C for 48 hours. The reaction mixture was subjected to column chromatography on silica gel and eluted with petroleum ether/ethyl acetate (10/1 to 6/1, v/v) to afford the corresponding product **3a**.

## 2 Typical procedure for the racemic product.

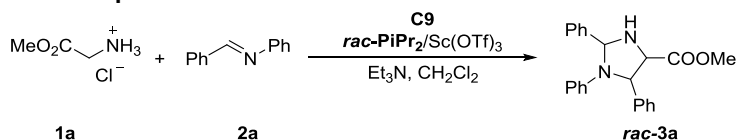

**Procedure A:** The reaction was conducted with Sc(OTf)<sub>3</sub> (4.9 mg, 10 mol%), **rac-PiPr<sub>2</sub>** (6.5 mg, 10 mol%), Et<sub>3</sub>N (15.5 μL, 0.11 mmol), and methyl glycine hydrochloride **1a** (12.6 mg, 0.10 mmol). CH<sub>2</sub>Cl<sub>2</sub> (0.60 mL) and pyridoxal hydrochloride (**C9**, 2.0 mg, 10 mol%) were added in succession. The mixture was stirred at 35 °C for 15 min, and imine **2a** (36.2 mg, 0.20 mmol) was added at 35 °C. The resulting mixture was stirred at 35 °C for 24 hours. The reaction mixture was subjected to column chromatography on silica gel and eluted with petroleum ether/ethyl acetate (10/1 to 6/1, v/v) to afford the corresponding product **rac-3a**.

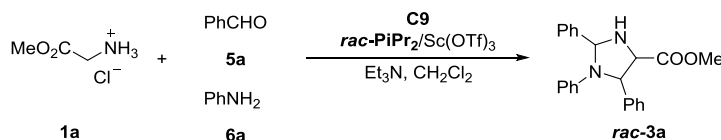

**Procedure B:** The reaction was conducted with Sc(OTf)<sub>3</sub> (4.9 mg, 10 mol%), **rac-PiPr<sub>2</sub>** (6.5 mg, 10 mol%), Et<sub>3</sub>N (15.5 μL, 0.11 mmol), and methyl glycine hydrochloride **1a** (12.6 mg, 0.10 mmol). CH<sub>2</sub>Cl<sub>2</sub> (0.60 mL) and pyridoxal hydrochloride (**C9**, 2.0 mg, 10 mol%) were added in succession. The mixture was stirred at 35 °C for 15 min, and aldehyde **5a** (20.0 μL, 0.20 mmol), amine **6a** (18.0 μL, 0.20 mmol) were added at 35 °C. The resulting mixture was stirred at 35 °C for 24 hours. The reaction mixture was subjected to column chromatography on silica gel and eluted with petroleum ether/ethyl acetate (10/1 to 6/1, v/v) to afford the corresponding product **rac-3a**.

## (D) Optimization of Conditions

Table S1. Screening of carbonyl catalyst<sup>a</sup>

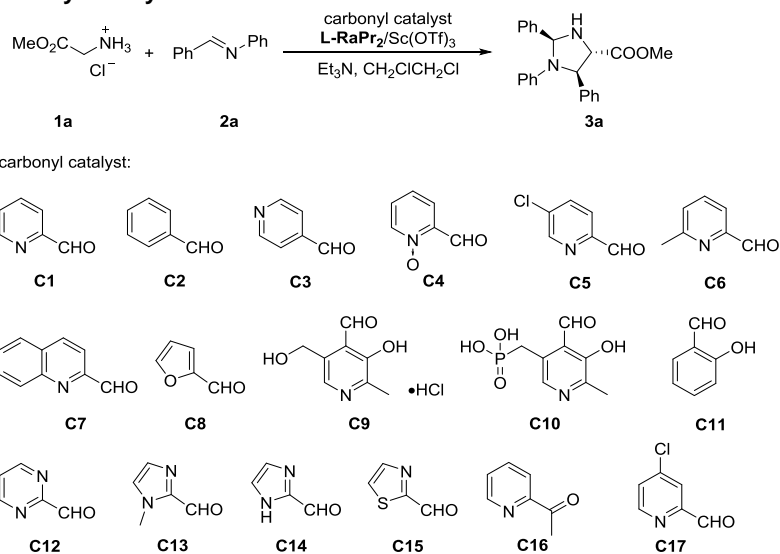

| entry | carbonyl catalyst | yield (%) <sup>b</sup> | dr <sup>c</sup> | ee (%) <sup>c</sup> |
|-------|-------------------|------------------------|-----------------|---------------------|
| 1     | <b>C1</b>         | 10                     | 78:22           | 23/49               |
| 2     | <b>C2</b>         | N.R.                   | --              | --                  |
| 3     | <b>C3</b>         | N.R.                   | --              | --                  |



|                |            |      |       |           |
|----------------|------------|------|-------|-----------|
| 4              | <b>C4</b>  | 19   | 75:25 | 5/racemic |
| 5              | <b>C5</b>  | 6    | 72:28 | 20/37     |
| 6              | <b>C6</b>  | 3    | 76:24 | racemic   |
| 7              | <b>C7</b>  | 13   | 84:16 | racemic   |
| 8 <sup>d</sup> | <b>C8</b>  | N.R. | --    | --        |
| 9              | <b>C9</b>  | 24   | 66:34 | 11/9      |
| 10             | <b>C10</b> | 14   | 66:34 | racemic   |
| 11             | <b>C11</b> | N.R. | --    | --        |
| 12             | --         | N.R. | --    | --        |

<sup>a</sup> Unless otherwise noted, all reactions were carried out with **1a** (0.10 mmol), **2a** (0.20 mmol), Et<sub>3</sub>N (0.10 mmol), carbonyl catalyst (10 mol%) and **L-RaPr**<sub>2</sub>/Sc(OTf)<sub>3</sub> (1:1, 10 mol%) in CH<sub>2</sub>ClCH<sub>2</sub>Cl (0.60 mL) at 35 °C for 24 h. <sup>b</sup> Isolated yield of **3a** based on **1a**. <sup>c</sup> Determined by HPLC on a chiral stationary phase. <sup>d</sup> Et<sub>3</sub>N (0.11 mmol) was used. <sup>e</sup> The reactions were carried out with **1a** (0.10 mmol), **2a** (0.20 mmol), NaOtBu (0.10 mmol), carbonyl catalyst (10 mol%) and **L-Ra(OiBu)**<sub>2</sub>/Yb(OTf)<sub>3</sub> (1:1, 10 mol%) in EtOAc (0.60 mL) at 35 °C for 24 h.

**Table S2. Screening of metal salts<sup>a</sup>**

| 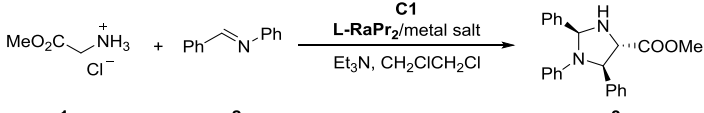 |                            |                        |                 |                     |
|------------------------------------------------------------------------------------|----------------------------|------------------------|-----------------|---------------------|
| entry                                                                              | metal salt                 | yield (%) <sup>b</sup> | dr <sup>c</sup> | ee (%) <sup>c</sup> |
| 1                                                                                  | Mg(OTf) <sub>2</sub>       | 2                      | 68:32           | 7/20                |
| 2                                                                                  | Sc(OTf) <sub>3</sub>       | 8                      | 78:22           | 23/49               |
| 3                                                                                  | Fe(OTf) <sub>3</sub>       | 5                      | 57:43           | racemic             |
| 4                                                                                  | Ni(OTf) <sub>2</sub>       | < 2                    | 66:34           | racemic             |
| 5                                                                                  | Cu(OTf) <sub>2</sub>       | 4                      | 52:48           | racemic             |
| 6                                                                                  | Zn(OTf) <sub>2</sub>       | 14                     | 53:47           | racemic             |
| 7                                                                                  | Y(OTf) <sub>3</sub>        | 34                     | 71:29           | 48/35               |
| 8                                                                                  | La(OTf) <sub>3</sub>       | 28                     | 63:37           | 58/21               |
| 9                                                                                  | Nd(OTf) <sub>3</sub>       | 16                     | 65:35           | 55/63               |
| 10                                                                                 | Sm(OTf) <sub>3</sub>       | 20                     | 67:33           | 60/57               |
| 11                                                                                 | Eu(OTf) <sub>3</sub>       | 28                     | 64:36           | 56/57               |
| 12                                                                                 | Gd(OTf) <sub>3</sub>       | 36                     | 70:30           | 54/39               |
| 13                                                                                 | Dy(OTf) <sub>3</sub>       | 18                     | 64:36           | 54/52               |
| 14                                                                                 | Ho(OTf) <sub>3</sub>       | 41                     | 69:31           | 43/35               |
| 15                                                                                 | Er(OTf) <sub>3</sub>       | 29                     | 65:35           | 47/46               |
| 16                                                                                 | Tm(OTf) <sub>3</sub>       | 18                     | 75:25           | 23/37               |
| <b>17</b>                                                                          | <b>Yb(OTf)<sub>3</sub></b> | <b>31</b>              | <b>72:28</b>    | <b>59/35</b>        |
| 18                                                                                 | Lu(OTf) <sub>3</sub>       | 26                     | 69:31           | 40/37               |
| 19 <sup>d</sup>                                                                    | Cu(OTf) <sub>2</sub>       | N.R.                   | --              | --                  |
| 20 <sup>d</sup>                                                                    | Zn(OTf) <sub>2</sub>       | 15                     | 68:32           | racemic             |
| 21 <sup>d</sup>                                                                    | Sc(OTf) <sub>3</sub>       | 13                     | 68:32           | 27/21               |
| 22 <sup>d</sup>                                                                    | Y(OTf) <sub>3</sub>        | 3                      | 80:20           | 96                  |

|                 |                      |   |       |    |
|-----------------|----------------------|---|-------|----|
| 23 <sup>d</sup> | Dy(OTf) <sub>3</sub> | 7 | 81:19 | 96 |
| 24 <sup>d</sup> | Lu(OTf) <sub>3</sub> | 9 | 81:19 | 94 |

<sup>a</sup> Unless otherwise noted, all reactions were carried out with **1a** (0.10 mmol), **2a** (0.20 mmol), Et<sub>3</sub>N (0.10 mmol), **C1** (10 mol%) and **L-RaPr<sub>2</sub>**/metal salt (1:1, 10 mol%) in CH<sub>2</sub>ClCH<sub>2</sub>Cl (0.60 mL) at 35 °C for 24 h. <sup>b</sup> Isolated yield of **3a** based on **1a**. <sup>c</sup> Determined by HPLC on a chiral stationary phase. <sup>d</sup> The reactions were carried out with **1a** (0.10 mmol), **2a** (0.20 mmol), NaOtBu (0.10 mmol), **C16** (20 mol%) and **L-Ra(OiBu)<sub>2</sub>**/metal salt (1:1, 10 mol%) in EtOAc (0.60 mL) at 35 °C for 24 h.

**Table S3. Screening of ligands<sup>a</sup>**

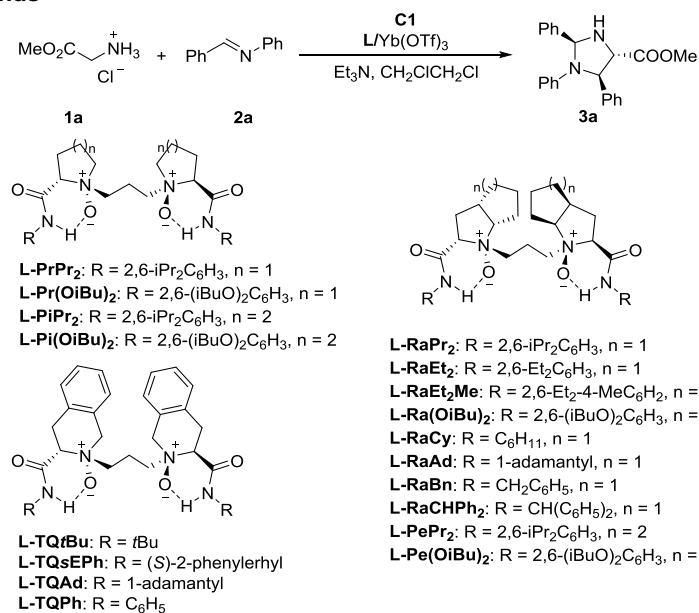

| entry           | L                             | yield (%) <sup>b</sup> | dr <sup>c</sup> | ee (%) <sup>c</sup> |
|-----------------|-------------------------------|------------------------|-----------------|---------------------|
| 1               | <b>L-PrPr<sub>2</sub></b>     | 32                     | 64:36           | 4/3                 |
| 2               | <b>L-PiPr<sub>2</sub></b>     | 36                     | 72:28           | 53/29               |
| 3               | <b>L-Pi(OiBu)<sub>2</sub></b> | 39                     | 77:23           | 73/61               |
| 4               | <b>L-TQtBu</b>                | <b>43</b>              | <b>75:25</b>    | <b>-80/-75</b>      |
| 5               | <b>L-RaPr<sub>2</sub></b>     | 31                     | 72:28           | 59/35               |
| 6               | <b>L-RaEt<sub>2</sub></b>     | 33                     | 66:34           | 67/59               |
| 7               | <b>L-RaEt<sub>2</sub>Me</b>   | 25                     | 72:28           | 75/71               |
| 8               | <b>L-Ra(OiBu)<sub>2</sub></b> | <b>43</b>              | <b>74:26</b>    | <b>81/76</b>        |
| 9               | <b>L-RaCy</b>                 | 5                      | 66:34           | 63/70               |
| 10              | <b>L-RaAd</b>                 | < 2                    | 64:36           | 38/33               |
| 11              | <b>L-RaBn</b>                 | 13                     | 70:30           | 76/74               |
| 12              | <b>L-RaCHPh<sub>2</sub></b>   | 16                     | 73:27           | 81/79               |
| 13              | <b>L-PePr<sub>2</sub></b>     | 22                     | 71:29           | 21/25               |
| 14              | <b>L-TQsEPH</b>               | 23                     | 64:36           | -74/-75             |
| 15              | <b>L-TQAd</b>                 | 24                     | 68:32           | -75/-90             |
| 16              | <b>L-TQPh</b>                 | 29                     | 75:25           | -59/-69             |
| 17 <sup>d</sup> | <b>L-Pi(OiBu)<sub>2</sub></b> | 9                      | 89:11           | 88                  |
| 18 <sup>d</sup> | <b>L-Pe(OiBu)<sub>2</sub></b> | 4                      | 83:17           | 71                  |
| 19 <sup>d</sup> | <b>L-RaCHPh<sub>2</sub></b>   | 24                     | 78:22           | 69/60               |

|                 |                           |    |       |       |
|-----------------|---------------------------|----|-------|-------|
| 20 <sup>d</sup> | <b>L-RaPr<sub>2</sub></b> | 10 | 73:27 | 37/37 |
| 21 <sup>d</sup> | <b>L-RaEt<sub>2</sub></b> | 3  | 78:22 | 71/79 |

<sup>a</sup> Unless otherwise noted, all reactions were carried out with **1a** (0.10 mmol), **2a** (0.20 mmol), Et<sub>3</sub>N (0.10 mmol), **C1** (10 mol%) and L/Yb(OTf)<sub>3</sub> (1:1, 10 mol%) in CH<sub>2</sub>ClCH<sub>2</sub>Cl (0.60 mL) at 35 °C for 24 h. <sup>b</sup> Isolated yield of **3a** based on **1a**. <sup>c</sup> Determined by HPLC on a chiral stationary phase. <sup>d</sup> The reactions were carried out with **1a** (0.10 mmol), **2a** (0.20 mmol), NaOtBu (0.10 mmol), **C16** (20 mol%) and L/Yb(OTf)<sub>3</sub> (1:1, 10 mol%) in EtOAc (0.60 mL) at 35 °C for 24 h.

**Table S4. Screening of solvent<sup>a</sup>**

| entry           | solvent                              | yield (%) <sup>b</sup> | dr <sup>c</sup> | ee (%) <sup>c</sup> |
|-----------------|--------------------------------------|------------------------|-----------------|---------------------|
| 1               | CH <sub>2</sub> ClCH <sub>2</sub> Cl | 43                     | 74:26           | 81/76               |
| 2               | THF                                  | 42                     | 68:32           | 90/89               |
| 3               | MeOH                                 | 55                     | 71:29           | 84/71               |
| 4               | MeCN                                 | 38                     | 61:39           | 27/27               |
| 5               | Et <sub>2</sub> O                    | 32                     | 75:25           | 86/90               |
| 6               | toluene                              | 34                     | 72:28           | 92/87               |
| 7               | MeOAc                                | 44                     | 73:27           | 82/71               |
| <b>8</b>        | <b>EtOAc</b>                         | <b>40</b>              | <b>72:28</b>    | <b>93/92</b>        |
| 9               | <sup>n</sup> PrOAc                   | 39                     | 75:25           | 91/85               |
| 10 <sup>d</sup> | toluene                              | 4                      | 83:17           | 74                  |
| 11 <sup>d</sup> | MeOH                                 | N.R.                   | --              | --                  |
| 12 <sup>d</sup> | CH <sub>2</sub> Cl <sub>2</sub>      | 7                      | 90:10           | 90                  |
| 13 <sup>d</sup> | <sup>n</sup> PrOAc                   | 20                     | 88:12           | 91                  |

<sup>a</sup> Unless otherwise noted, all reactions were carried out with **1a** (0.10 mmol), **2a** (0.20 mmol), Et<sub>3</sub>N (0.10 mmol), **C1** (10 mol%) and L-Ra(OiBu)<sub>2</sub>/Yb(OTf)<sub>3</sub> (1:1, 10 mol%) in solvent (0.60 mL) at 35 °C for 24 h. <sup>b</sup> Isolated yield of **3a** based on **1a**. <sup>c</sup> Determined by HPLC on a chiral stationary phase. <sup>d</sup> The reactions were carried out with **1a** (0.10 mmol), **2a** (0.20 mmol), NaOtBu (0.10 mmol), **C16** (20 mol%) and L-Pi(OiBu)<sub>2</sub>/Yb(OTf)<sub>3</sub> (1:1, 10 mol%) in solvent (0.60 mL) at 35 °C for 24 h.

**Table S5. Screening of bases<sup>a</sup>**

| entry | base                             | yield (%) <sup>b</sup> | dr <sup>c</sup> | ee (%) <sup>c</sup> |
|-------|----------------------------------|------------------------|-----------------|---------------------|
| 1     | Et <sub>3</sub> N                | 40                     | 72:28           | 93/92               |
| 2     | <sup>n</sup> Pr <sub>3</sub> N   | 34                     | 70:30           | 57/59               |
| 3     | iPr <sub>2</sub> NH              | 30                     | 70:30           | 91/91               |
| 4     | DMAP                             | 34                     | 77:23           | 73/80               |
| 5     | DBU                              | 5                      | 71:29           | 49/55               |
| 6     | DABCO                            | 7                      | 78:22           | 95/85               |
| 7     | TMDEA                            | 19                     | 78:22           | 95/89               |
| 8     | <sup>n</sup> Bu <sub>4</sub> NBr | 4                      | 58:42           | 65/47               |

|                 |                                 |           |              |                |
|-----------------|---------------------------------|-----------|--------------|----------------|
| 9               | Na <sub>2</sub> CO <sub>3</sub> | 19        | 88:12        | 93             |
| 10              | Na <sub>3</sub> PO <sub>4</sub> | 8         | 68:32        | 79/80          |
| 11              | NaOH                            | 46        | 83:17        | 96/95          |
| 12              | NaOAc                           | 32        | 81:19        | 72/24          |
| 13              | NaOMe                           | 33        | 83:17        | 91/99          |
| 14              | NaOEt                           | 39        | 82:18        | 95/99          |
| 15              | <b>NaOtBu</b>                   | <b>40</b> | <b>93:7</b>  | <b>95/91</b>   |
| 16              | LiOtBu                          | 37        | 77:23        | 43/49          |
| 17              | KOtBu                           | 11        | 93:7         | 94             |
| 18              | --                              | N.R.      |              |                |
| 19 <sup>d</sup> | NaOtBu                          | 30        | 77:23        | 68/65          |
| 20 <sup>e</sup> | NaOtBu                          | 37        | 94:6         | 96             |
| 21 <sup>f</sup> | NaOtBu                          | 4         | 95:5         | 96             |
| 22 <sup>g</sup> | NaOtBu                          | 43        | 90:10        | 91             |
| 23 <sup>h</sup> | NaOtBu                          | 41        | 90:10        | 70             |
| 23 <sup>i</sup> | NaOtBu                          | 36        | 92:8         | 97             |
| 24 <sup>j</sup> | <b>NaOtBu</b>                   | <b>34</b> | <b>86:14</b> | <b>-87/-90</b> |
| 25 <sup>k</sup> | NaOtBu                          | 42        | 88:12        | 92/90          |
| 26 <sup>l</sup> | NaOtBu                          | 7         | 70:30        | racemic        |
| 27 <sup>m</sup> | Et <sub>3</sub> N               | N.R.      | --           | --             |
| 28 <sup>m</sup> | DMAP                            | N.R.      | --           | --             |
| 29 <sup>m</sup> | Na <sub>2</sub> CO <sub>3</sub> | N.R.      | --           | --             |

<sup>a</sup> Unless otherwise noted, all reactions were carried out with **1a** (0.10 mmol), **2a** (0.20 mmol), base (0.10 mmol), **C1** (10 mol%) and **L-Ra(OiBu)<sub>2</sub>/Yb(OTf)<sub>3</sub>** (1:1, 10 mol%) in EtOAc (0.60 mL) at 35 °C for 24 h. <sup>b</sup> Isolated yield of **3a** based on **1a**. <sup>c</sup> Determined by HPLC on a chiral stationary phase. <sup>d</sup> NaOtBu (0.05 mmol) was used. <sup>e</sup> NaOtBu (0.11 mmol) was used. <sup>f</sup> NaOtBu (0.15 mmol) was used. <sup>g</sup> **L-Pi(OiBu)<sub>2</sub>** was used instead of **L-Ra(OiBu)<sub>2</sub>**. <sup>h</sup> **L-Pr(OiBu)<sub>2</sub>** was used instead of **L-Ra(OiBu)<sub>2</sub>**. <sup>i</sup> **L-Pe(OiBu)<sub>2</sub>** was used instead of **L-Ra(OiBu)<sub>2</sub>**. <sup>j</sup> **L-TqOtBu** was used instead of **L-Ra(OiBu)<sub>2</sub>**. <sup>k</sup> **L-RaEt<sub>2</sub>** was used instead of **L-Ra(OiBu)<sub>2</sub>**. <sup>l</sup> Ligand was absent. <sup>m</sup> The reactions were carried out with **1a** (0.10 mmol), **2a** (0.20 mmol), base (0.10 mmol), **C16** (20 mol%) and **L-Pi(OiBu)<sub>2</sub>/Yb(OTf)<sub>3</sub>** (1:1, 10 mol%) in EtOAc (0.60 mL) at 35 °C for 24 h.

**Table S6. Screening of the amount of C1<sup>a</sup>**

| entry          | amount of <b>C1</b> (mol%) | yield (%) <sup>b</sup> | dr <sup>c</sup> | ee (%) <sup>c</sup> |
|----------------|----------------------------|------------------------|-----------------|---------------------|
| 1              | 0                          | N.R.                   |                 |                     |
| 2              | 5                          | 10                     | 81:19           | 77/30               |
| 3              | 10                         | 40                     | 93:7            | 95                  |
| 4              | <b>20</b>                  | <b>44</b>              | <b>93:7</b>     | <b>95/97</b>        |
| 5              | 50                         | 30                     | 91:9            | 93                  |
| 6              | 100                        | 3                      | 65:35           | race/race           |
| 7 <sup>d</sup> | 20                         | 21                     | 91:9            | 96                  |
| 8 <sup>e</sup> | 20                         | 47                     | 83:17           | 93/87               |

|                 |    |    |      |    |
|-----------------|----|----|------|----|
| 9 <sup>f</sup>  | 20 | 35 | 93:7 | 96 |
| 10 <sup>g</sup> | 20 | 43 | 91:9 | 96 |

<sup>a</sup> Unless otherwise noted, all reactions were carried out with **1a** (0.10 mmol), **2a** (0.20 mmol), NaOtBu (0.10 mmol), **C1**, and **L-Ra(OiBu)<sub>2</sub>/Yb(OTf)<sub>3</sub>** (1:1, 10 mol%) in EtOAc (0.60 mL) at 35 °C for 24 h. <sup>b</sup> Isolated yield of **3a** based on **1a**. <sup>c</sup> Determined by HPLC on a chiral stationary phase. <sup>d</sup> EtOAc (1.0 mL) was used. <sup>e</sup> EtOAc (0.20 mL) was used. <sup>f</sup> The reaction was carried out at 30 °C. <sup>g</sup> The reaction was carried out at 40 °C.

**Table S7. Screening of additives<sup>a</sup>**

| entry                   | additive                                | yield (%) <sup>b</sup> | dr <sup>c</sup> | ee (%) <sup>c</sup> |
|-------------------------|-----------------------------------------|------------------------|-----------------|---------------------|
| 1                       | 10 μL (24.0 equiv) MeOH                 | 40                     | 89:11           | 97                  |
| 2                       | 10 μL (16.0 equiv) EtOH                 | 44                     | 93:7            | 96                  |
| 3                       | 10 μL (10.0 equiv) tBuOH                | 42                     | 90:10           | 98                  |
| 4                       | 10 μL (55.0 equiv) H <sub>2</sub> O     | 37                     | 86:14           | 97                  |
| 5                       | 10 mol% PhCOOH                          | 39                     | 93:7            | 97                  |
| 6                       | 1.0 equiv PhCHO                         | 48                     | 84:16           | 96/90               |
| 7                       | 1.0 equiv PhNH <sub>2</sub>             | 39                     | 88:12           | 94                  |
| 8                       | 30 mol% NaBAR <sup>F</sup> <sub>4</sub> | 51                     | 84:16           | 78/74               |
| 9                       | 30 mol% LiNTf <sub>2</sub>              | 56                     | 82:18           | 87/79               |
| 10                      | 30 mg 3Å MS                             | 38                     | 84:16           | 91/80               |
| 11                      | 30 mg 4Å MS                             | 49                     | 93:7            | 96                  |
| 12                      | 30 mg 5Å MS                             | 46                     | 88:12           | 93                  |
| 13                      | 10 mg 4Å MS                             | 52                     | 91:9            | 96                  |
| 14                      | 20 mg 4Å MS                             | 51                     | 93:7            | 96                  |
| 15                      | 100 mg 4Å MS                            | 45                     | 93:7            | 97                  |
| <b>16</b>               | <b>5 μL (8.0 equiv) EtOH</b>            | <b>46</b>              | <b>94:6</b>     | <b>97/97</b>        |
| 17                      | 50 μL (80.0 equiv) EtOH                 | 44                     | 93:7            | 97                  |
| 18 <sup>d</sup>         | 5 μL (8.0 equiv) EtOH                   | 48                     | 93:7            | 97                  |
| 19 <sup>e</sup>         | 5 μL (8.0 equiv) EtOH                   | 50                     | 93:7            | 96                  |
| <b>20<sup>d,f</sup></b> | <b>5 μL (8.0 equiv) EtOH</b>            | <b>62</b>              | <b>95:5</b>     | <b>97/99</b>        |
| 21 <sup>e,f</sup>       | 5 μL (8.0 equiv) EtOH                   | 61                     | 92:8            | 95                  |

<sup>a</sup> Unless otherwise noted, all reactions were carried out with **1a** (0.10 mmol), **2a** (0.20 mmol), NaOtBu (0.10 mmol), **C1** (20 mol%), additive and **L-Ra(OiBu)<sub>2</sub>/Yb(OTf)<sub>3</sub>** (1:1, 10 mol%) in EtOAc (0.60 mL) at 35 °C for 24 h. <sup>b</sup> Isolated yield of **3a** based on **1a**. <sup>c</sup> Determined by HPLC on a chiral stationary phase. <sup>d</sup> **2a** (0.30 mmol) was used. <sup>e</sup> **2a** (0.40 mmol) was used. <sup>f</sup> The reaction was carried out for 48 h.

**Table S8. Re-screening of carbonyl catalyst<sup>a</sup>**

| entry | additive  | yield (%) <sup>b</sup> | dr <sup>c</sup> | ee (%) <sup>c</sup> |
|-------|-----------|------------------------|-----------------|---------------------|
| 1     | <b>C1</b> | 40                     | 93:7            | 95                  |

|    |            |      |       |       |
|----|------------|------|-------|-------|
| 2  | <b>C2</b>  | N.R. | --    | --    |
| 3  | <b>C3</b>  | N.R. | --    | --    |
| 4  | <b>C4</b>  | 45   | 81:19 | 9     |
| 5  | <b>C5</b>  | 45   | 85:15 | 94    |
| 6  | <b>C6</b>  | 11   | 92:8  | 90    |
| 7  | <b>C9</b>  | 27   | 75:25 | 31/20 |
| 8  | <b>C12</b> | 10   | 93:7  | 97    |
| 9  | <b>C13</b> | 22   | 90:10 | 83    |
| 10 | <b>C14</b> | 14   | 90:10 | 91    |
| 11 | <b>C15</b> | 3    | 95:5  | 95    |
| 12 | <b>C16</b> | 8    | 84:16 | 94    |
| 13 | <b>C17</b> | 44   | 83:17 | 94    |

<sup>a</sup> Unless otherwise noted, all reactions were carried out with **1a** (0.10 mmol), **2a** (0.20 mmol), NaOtBu (0.10 mmol), carbonyl catalyst (10 mol%) and **L-Ra(OiBu)<sub>2</sub>/Yb(OTf)<sub>3</sub>** (1:1, 10 mol%) in EtOAc (0.60 mL) at 35 °C for 24 h. <sup>b</sup> Isolated yield of **3a** based on **1a**. <sup>c</sup> Determined by HPLC on a chiral stationary phase.

**Table S9. Screening of three-component reaction<sup>a</sup>**

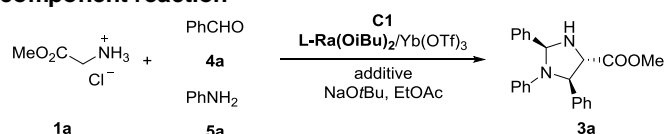

| entry                | additive              | amount of <b>4a</b> (mmol) | amount of <b>5a</b> (mmol) | yield (%) <sup>b</sup> | dr <sup>c</sup> | ee (%) <sup>c</sup> |
|----------------------|-----------------------|----------------------------|----------------------------|------------------------|-----------------|---------------------|
| 1                    | 20 mg 4Å MS           | 0.20                       | 0.20                       | 42                     | 95:5            | 97                  |
| 2                    | 20 mg 4Å MS           | 0.30                       | 0.30                       | 45                     | 94:6            | 97                  |
| 3                    | 20 mg 4Å MS           | 0.20                       | 0.30                       | 39                     | 95:5            | 97                  |
| 4                    | 20 mg 4Å MS           | 0.30                       | 0.20                       | 48                     | 86:14           | 97                  |
| 5                    | 20 mg 4Å MS           | 0.60                       | 0.30                       | 51                     | 80:20           | 95                  |
| 6                    | 5 μL (8.0 equiv) EtOH | 0.20                       | 0.20                       | 31                     | 93:7            | 96                  |
| <b>7<sup>d</sup></b> | <b>20 mg 4Å MS</b>    | <b>0.30</b>                | <b>0.30</b>                | <b>55</b>              | <b>95:5</b>     | <b>96/97</b>        |

<sup>a</sup> Unless otherwise noted, all reactions were carried out with **1a** (0.10 mmol), **4a** (x mmol), **5a** (x mmol), NaOtBu (0.10 mmol), **C1** (20 mol%), additive and **L-Ra(OiBu)<sub>2</sub>/Yb(OTf)<sub>3</sub>** (1:1, 10 mol%) in EtOAc (0.60 mL) at 35 °C for 24 h. <sup>b</sup> Isolated yield of **3a** based on **1a**. <sup>c</sup> Determined by HPLC on a chiral stationary phase. <sup>d</sup> The reaction was carried out for 48 h.

**Table S10. Unsuccessful examples**

1. Failed examples

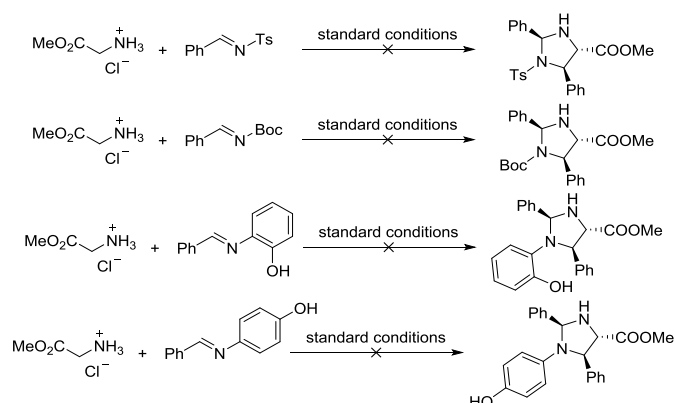

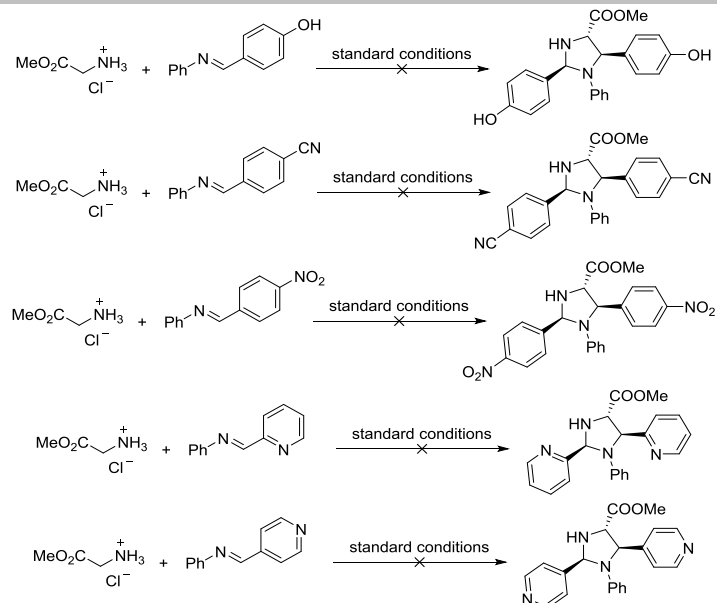

Alkyl imines were ineffective caused the alkyl imines don't have conjugation stabilization. Thus they are relatively unstable as compared to aromatic imines and easily hydrolyzed under the reaction condition.<sup>3</sup>

## 2. Racemic examples

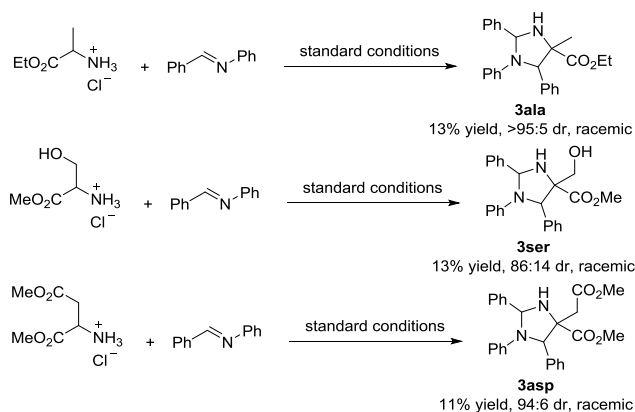

## (E) X-ray Crystal Structure of Product 3n and *N,N*-Dioxide/Yb(OTf)<sub>3</sub> Complexes

The colourless and block-shape crystals were selected and mounted for the single-crystal X-ray diffraction. The data set was collected by a Bruker D8 Venture Photon II at 170 K equipped with micro-focus Cu radiation source ( $K_{\alpha} = 1.54178\text{\AA}$ ). Applied with face-indexed numerical absorption correction, the structure solution was solved and refinement was processed by SHELXTL (version 6.14) program package. The structure was analyzed by ADDSYM routine implemented in PLATON suite and no higher symmetry was suggested.

The crystal of product **3n** was obtained in the solvents of dichloromethane and *n*-hexane. CCDC 1983265 contains the supplementary crystallographic data for this paper. These data can be obtained free of charge from The Cambridge Crystallographic Data Center via <https://www.ccdc.cam.ac.uk/>.

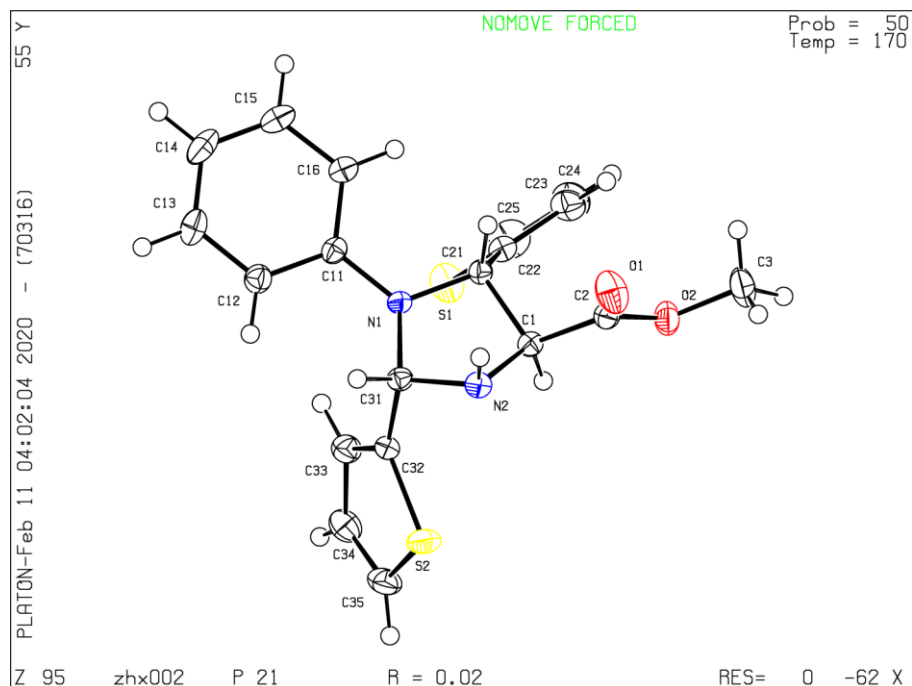

Figure S1. X-ray Crystal Structure of Product 3n

Crystallographic Data for  $C_{19}H_{18}N_2O_2S_2$ .

|                                              |                         |
|----------------------------------------------|-------------------------|
| Formula                                      | $C_{19}H_{18}N_2O_2S_2$ |
| Formula mass (amu)                           | 370.47                  |
| Space group                                  | P 21                    |
| <i>a</i> (Å)                                 | 9.6009 (2)              |
| <i>b</i> (Å)                                 | 10.3983 (2)             |
| <i>c</i> (Å)                                 | 9.9867 (2)              |
| $\alpha$ (deg)                               | 90                      |
| $\beta$ (deg)                                | 115.222 (2)             |
| $\gamma$ (deg)                               | 90                      |
| <i>V</i> (Å <sup>3</sup> )                   | 901.95 (3)              |
| <i>Z</i>                                     | 2                       |
| $\lambda$ (Å)                                | 1.54178                 |
| <i>T</i> (K)                                 | 170 K                   |
| $\rho_{\text{calcd}}$ (g cm <sup>-3</sup> )  | 1.364                   |
| <i>m</i> (mm <sup>-1</sup> )                 | 2.797                   |
| Transmission factors                         | 0.686, 0.832            |
| $2\theta_{\text{max}}$ (deg)                 | 74.738                  |
| No. of unique data, including $F_o^2 < 0$    | 3635                    |
| No. of unique data, with $F_o^2 > 2s(F_o^2)$ | 3574                    |
| No. of variables                             | 231                     |



$R(F)$  for  $F_o^2 > 2s(F_o^2)^a$  0.0236

$R_w(F_o^2)^b$  0.0607

Goodness of fit 1.038

$^a R(F) = \sum ||F_o| - |F_c|| / \sum |F_o|$ .  $^b R_w(F_o^2) = [\sum [w(F_o^2 - F_c^2)^2] / \sum wF_o^4]^{1/2}$ ;  $w^{-1} = [\sigma^2(F_o^2) + (Ap)^2 + Bp]$ , where  $p = [\max(F_o^2, 0) + 2F_c^2] / 3$ .

The crystal of **L-RaEt<sub>2</sub>/Yb(OTf)<sub>3</sub>** was obtained in the solvents of MeOH and Et<sub>2</sub>O. CCDC 2011003 contains the supplementary crystallographic data for this paper. These data can be obtained free of charge from The Cambridge Crystallographic Data Center via <https://www.ccdc.cam.ac.uk/>.

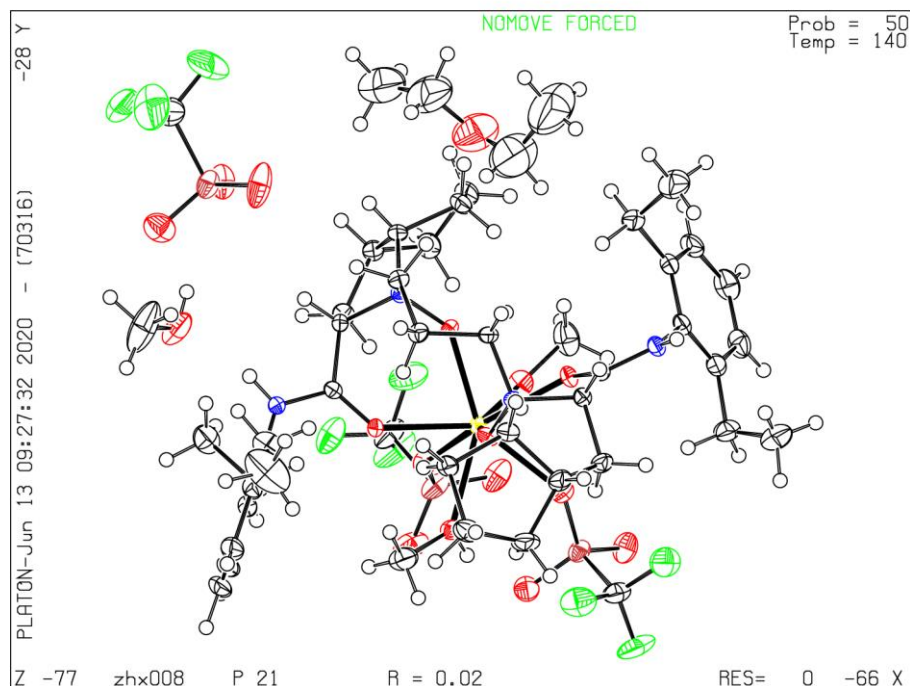

Square-antiprism geometry

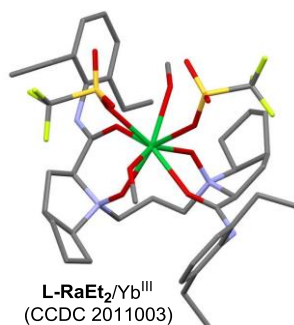

**Figure S2.** X-ray Crystal Structure of **L-RaEt<sub>2</sub>/Yb(OTf)<sub>3</sub>** Complex

Crystallographic Data for **C<sub>43</sub>H<sub>64</sub>F<sub>6</sub>N<sub>4</sub>O<sub>12</sub>S<sub>2</sub>Yb**.

|                    |                                                                                                 |
|--------------------|-------------------------------------------------------------------------------------------------|
| Formula            | C <sub>43</sub> H <sub>64</sub> F <sub>6</sub> N <sub>4</sub> O <sub>12</sub> S <sub>2</sub> Yb |
| Formula mass (amu) | 1435.37                                                                                         |
| Space group        | P 21                                                                                            |
| a (Å)              | 11.9789 (5)                                                                                     |
| b (Å)              | 20.7474 (9)                                                                                     |

|                                              |             |
|----------------------------------------------|-------------|
| $c$ (Å)                                      | 12.9099 (5) |
| $\alpha$ (deg)                               | 90          |
| $\beta$ (deg)                                | 106.293 (1) |
| $\gamma$ (deg)                               | 90          |
| $V$ (Å <sup>3</sup> )                        | 3079.7 (2)  |
| $Z$                                          | 2           |
| $\lambda$ (Å)                                | 1.54178     |
| $T$ (K)                                      | 140 K       |
| $\rho_{\text{calcd}}$ (g cm <sup>-3</sup> )  | 1.548       |
| $m$ (mm <sup>-1</sup> )                      | 4.592       |
| Transmission factors                         | 0.767,1.000 |
| $2\theta_{\text{max}}$ (deg)                 | 80.757      |
| No. of unique data, including $F_o^2 < 0$    | 13247       |
| No. of unique data, with $F_o^2 > 2s(F_o^2)$ | 13218       |
| No. of variables                             | 778         |
| $R(F)$ for $F_o^2 > 2s(F_o^2)$ <sup>a</sup>  | 0.0217      |
| $R_w(F_o^2)$ <sup>b</sup>                    | 0.0560      |
| Goodness of fit                              | 1.053       |

<sup>a</sup> $R(F) = \sum ||F_o| - |F_c|| / \sum |F_o|$ . <sup>b</sup> $R_w(F_o^2) = [\sum [w(F_o^2 - F_c^2)^2] / \sum wF_o^4]^{1/2}$ ;  $w^{-1} = [\sigma^2(F_o^2) + (Ap)^2 + Bp]$ , where  $p = [\max(F_o^2, 0) + 2F_c^2] / 3$ .

The crystal of **L-TQ<sub>4</sub>Bu**/Yb(OTf)<sub>3</sub> was obtained in the solvents of THF/EtOAc and n-Hexane. CCDC 2011004 contains the supplementary crystallographic data for this paper. These data can be obtained free of charge from The Cambridge Crystallographic Data Center via <https://www.ccdc.cam.ac.uk/>.

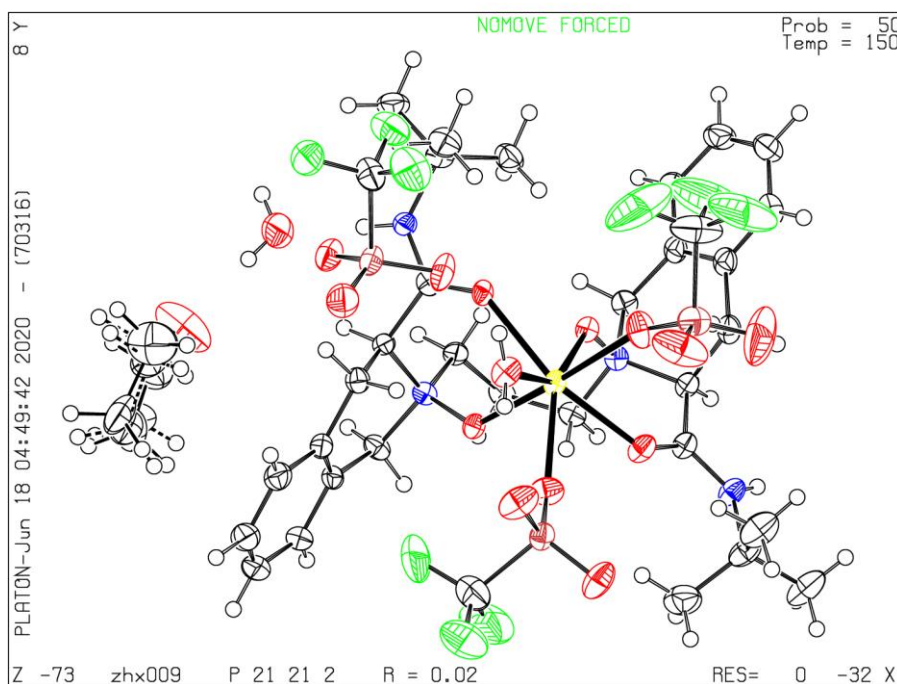

Pentagonal bipyramid geometry

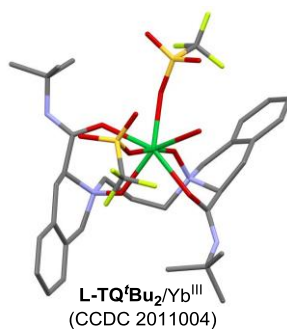

Figure S3. X-ray Crystal Structure of L-TQfBu/ Yb(OTf)<sub>3</sub> Complex

Crystallographic Data for C<sub>38</sub>H<sub>56</sub>F<sub>9</sub>N<sub>4</sub>O<sub>16</sub>S<sub>3</sub>Yb.

|                                                                                                                               |                                                                                                 |
|-------------------------------------------------------------------------------------------------------------------------------|-------------------------------------------------------------------------------------------------|
| Formula                                                                                                                       | C <sub>38</sub> H <sub>56</sub> F <sub>9</sub> N <sub>4</sub> O <sub>16</sub> S <sub>3</sub> Yb |
| Formula mass (amu)                                                                                                            | 1265.08                                                                                         |
| Space group                                                                                                                   | P 21 21 2                                                                                       |
| <i>a</i> (Å)                                                                                                                  | 23.0690(11)                                                                                     |
| <i>b</i> (Å)                                                                                                                  | 24.5839(12)                                                                                     |
| <i>c</i> (Å)                                                                                                                  | 9.5501(4)                                                                                       |
| <i>α</i> (deg)                                                                                                                | 90                                                                                              |
| <i>β</i> (deg)                                                                                                                | 90                                                                                              |
| <i>γ</i> (deg)                                                                                                                | 90                                                                                              |
| <i>V</i> (Å <sup>3</sup> )                                                                                                    | 5416.1(4)                                                                                       |
| <i>Z</i>                                                                                                                      | 4                                                                                               |
| <i>λ</i> (Å)                                                                                                                  | 0.71073                                                                                         |
| <i>T</i> (K)                                                                                                                  | 150 K                                                                                           |
| <i>r</i> <sub>calcd</sub> (g cm <sup>-3</sup> )                                                                               | 1.551                                                                                           |
| <i>m</i> (mm <sup>-1</sup> )                                                                                                  | 1.937                                                                                           |
| Transmission factors                                                                                                          | 0.353,0.616                                                                                     |
| 2 <i>θ</i> <sub>max</sub> (deg)                                                                                               | 27.636                                                                                          |
| No. of unique data, including <i>F</i> <sub>o</sub> <sup>2</sup> < 0                                                          | 12456                                                                                           |
| No. of unique data, with <i>F</i> <sub>o</sub> <sup>2</sup> > 2 <i>s</i> ( <i>F</i> <sub>o</sub> <sup>2</sup> )               | 12275                                                                                           |
| No. of variables                                                                                                              | 704                                                                                             |
| <i>R</i> ( <i>F</i> ) for <i>F</i> <sub>o</sub> <sup>2</sup> > 2 <i>s</i> ( <i>F</i> <sub>o</sub> <sup>2</sup> ) <sup>a</sup> | 0.0215                                                                                          |
| <i>R</i> <sub>w</sub> ( <i>F</i> <sub>o</sub> <sup>2</sup> ) <sup>b</sup>                                                     | 0.0572                                                                                          |
| Goodness of fit                                                                                                               | 1.125                                                                                           |

<sup>a</sup>*R*(*F*) =  $\sum ||F_o| - |F_c|| / \sum |F_o|$ . <sup>b</sup>*R*<sub>w</sub>(*F*<sub>o</sub><sup>2</sup>) =  $[\sum [w(F_o^2 - F_c^2)^2] / \sum wF_o^4]^{1/2}$ ;  $w^{-1} = [\sigma^2(F_o^2) + (Ap)^2 + Bp]$ , where  $p = [\max(F_o^2, 0) + 2F_c^2] / 3$ .

## (F) Experimental Procedure for the Scale-up Reaction and Transformations of the Products

### 1 Scale-up experiment

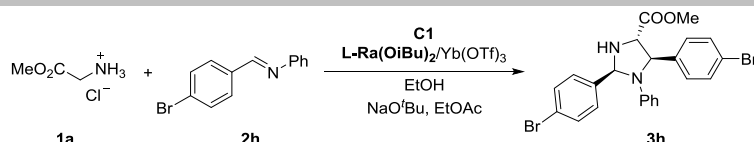

The reaction was conducted with methyl glycine hydrochloride **1a** (378.0 mg, 3.0 mmol), Yb(OTf)<sub>3</sub> (186.0 mg, 10 mol%), **L-Ra(OiBu)<sub>2</sub>** (246.0 mg, 10 mol%), NaOtBu (288.0 mg, 3.0 mmol) and EtOH (150.0 μL, 8.0 equiv). Picolinaldehyde (**C1**, 60.0 μL, 20 mol%) and EtOAc (18.0 mL) were added in succession. The mixture was stirred at 35 °C for 30 min, and imine **2h** (2340.0 mg, 9.0 mmol) was added at 35 °C, the resulting mixture was stirred at 35 °C for 60 hours. The reaction mixture was subjected to column chromatography on silica gel to afford the product **3h** (PET/EtOAc = 10/1 to PET/EtOAc = 5/1 as eluent) as pale yellow oil (0.9725 g, 62% yield, 92:8 dr, 93% ee). The dr value was as determined by <sup>1</sup>H NMR analysis and the ee value was determined by high-performance liquid chromatography (HPLC) with chiralcel Daicel Chiralcel IF column.

## 2 Experimental procedures for further transformations of product 3a.

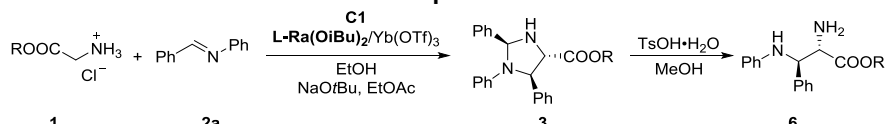

The reaction was conducted with Yb(OTf)<sub>3</sub> (6.2 mg, 10 mol%), **L-Ra(OiBu)<sub>2</sub>** (8.2 mg, 10 mol%), NaOtBu (9.6 mg, 0.10 mmol), methyl glycine hydrochloride **1a** (12.6 mg, 0.10 mmol), and EtOH (5.0 μL, 8.0 equiv). Picolinaldehyde (**C1**, 2.0 μL, 20 mol%) and EtOAc (0.60 mL) were added in succession. The mixture was stirred at 35 °C for 15 min, and imine **2a** (54.0 mg, 0.30 mmol) was added at 35 °C. The resulting mixture was stirred at 35 °C for 48 hours. The reaction mixture was subjected to column chromatography on silica gel to afford the crude product **3a**. The product **3a** was dissolved in 3.0 mL of methanol at room temperature followed by the addition of TsOH·H<sub>2</sub>O (38.0 mg, 0.20 mmol). The reaction mixture was stirred for 8 h and neutralized the mixture by saturated Na<sub>2</sub>CO<sub>3</sub> solution. Then the mixture was partitioned between ethyl acetate and water, then the organic layer was washed with brine, dried over MgSO<sub>4</sub>, filtered and evaporated in vacuo than the organic solvent was removed and then the residue was purified by column chromatography on silica gel and eluted with petroleum ether/ethyl acetate (4/1 to 1/1, v/v) to afford the corresponding product **6a**.

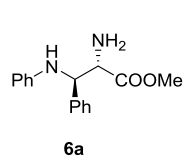

**Methyl (2S,3R)-2-amino-3-phenyl-3-(phenylamino)propanoate (6a)**: 51% yield over two step, White solid; **m.p.**: 93.6 – 97.0; *R<sub>f</sub>* = 0.4 (petroleum ether/ethyl acetate = 1/1); Dissolved in iPrOH for HPLC; **HPLC** (Chiralcel IG, hexane/iPrOH = 90/10, flow rate 1.0 mL/min, λ = 254 nm); major isomer: *t<sub>r</sub>* (major) = 13.38 min, *t<sub>r</sub>* (minor) = 14.45 min, ee = 98%; minor isomer: *t<sub>r</sub>* (major) = 15.25 min. dr = 93:7 determined by <sup>1</sup>H NMR. [α]<sub>D</sub><sup>24</sup> = +138.2 (*c* = 0.15, in tetrahydrofuran). **<sup>1</sup>H NMR (400 MHz, CDCl<sub>3</sub>)** δ 7.38 – 7.24 (m, 6H), 7.10 – 7.03 (m, 2H), 6.66 – 6.61 (m, 1H), 6.55 – 6.51 (m, 2H), 5.11 (s, 1H), 4.88 (s, 1H), 3.94 (d, *J* = 3.6 Hz, 1H), 3.70 (s, 3H) ppm; **<sup>13</sup>C{<sup>1</sup>H} NMR (101 MHz, CDCl<sub>3</sub>)** δ 173.2, 146.8, 140.1, 129.1, 128.7, 127.5, 126.9, 117.4, 113.8, 59.6, 59.1, 52.4 ppm; **IR (neat) ν (cm<sup>-1</sup>)**: 3389, 3027, 1737, 1603, 1506, 1453, 1434, 1229, 993, 752, 704; **HRMS (ESI-FT)** calcd for C<sub>16</sub>H<sub>19</sub>N<sub>2</sub>O<sub>2</sub><sup>+</sup> ([M]+H<sup>+</sup>) = 271.1441, found 271.1436.

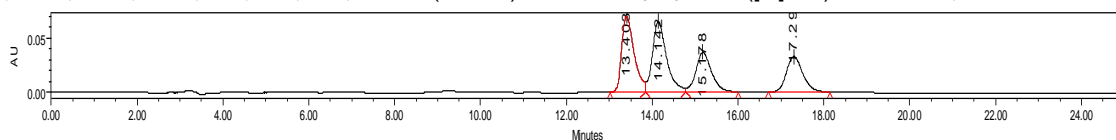

|   | Retention Time | Area    | % Area |
|---|----------------|---------|--------|
| 1 | 13.403         | 1421789 | 29.99  |
| 2 | 14.142         | 1505233 | 31.75  |
| 3 | 15.178         | 929616  | 19.61  |
| 4 | 17.299         | 884658  | 18.66  |

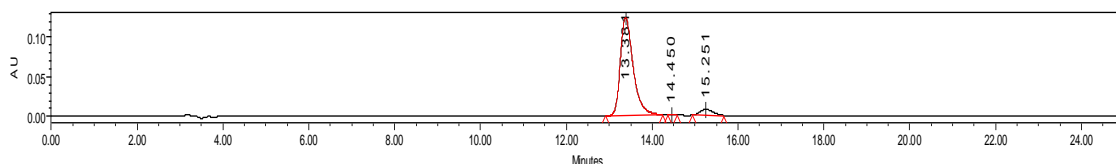

|   | Retention Time | Area    | % Area |
|---|----------------|---------|--------|
| 1 | 13.381         | 2571988 | 94.21  |
| 2 | 14.450         | 878     | 0.03   |
| 3 | 15.251         | 157306  | 5.76   |

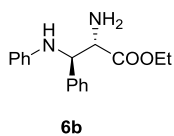

**Ethyl (2*S*,3*R*)-2-amino-3-phenyl-3-(phenylamino)propanoate (6b): Procedure C:** 30% yield over two step, White solid; **m.p.:** 74.0 – 78.7;  $R_f = 0.4$  (petroleum ether/ethyl acetate = 1/1); Dissolved in iPrOH for HPLC; **HPLC** (Chiralcel IH, hexane/iPrOH = 90/10, flow rate 1.0 mL/min,  $\lambda = 254$  nm); major isomer:  $t_r$  (major) = 11.76 min,  $t_r$  (minor) = 16.39 min, ee = 96%; minor isomer:  $t_r$  (major) = 14.42 min. dr = 91:9 determined by  $^1\text{H NMR}$ .  $[\alpha]_D^{27} = +59.7$  ( $c = 0.30$ , in tetrahydrofuran).  $^1\text{H NMR}$  (400 MHz,  $\text{CDCl}_3$ )  $\delta$  7.31 – 7.14 (m, 6H), 7.01 – 6.96 (m, 2H), 6.57 – 6.52 (m, 1H), 6.48 – 6.44 (m, 2H), 5.01 (s, 1H), 4.79 – 4.77 (m, 1H), 4.07 (q,  $J = 7.2$  Hz, 2H), 3.83 (d,  $J = 4.0$  Hz, 1H), 1.09 (t,  $J = 7.1$  Hz, 3H) ppm;  $^{13}\text{C}\{^1\text{H}\}$  NMR (101 MHz,  $\text{CDCl}_3$ )  $\delta$  172.8, 147.0, 140.2, 129.0, 128.7, 127.4, 126.9, 117.4, 113.7, 61.4, 59.6, 59.3, 14.1 ppm; **IR** (neat)  $\nu$  ( $\text{cm}^{-1}$ ): 3360, 2932, 1731, 1599, 1502, 1453, 1345, 1259, 1195, 1061, 751, 697; **HRMS** (ESI-FT) calcd for  $\text{C}_{17}\text{H}_{21}\text{N}_2\text{O}_2^+$  ( $[\text{M}+\text{H}^+]$ ) = 285.1598, found 285.1598.

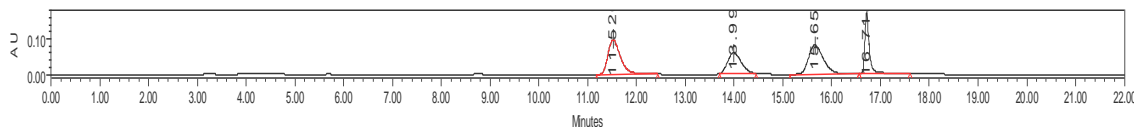

|   | Retention Time | Area    | % Area |
|---|----------------|---------|--------|
| 1 | 11.520         | 1749632 | 30.38  |
| 2 | 13.990         | 1126999 | 19.57  |
| 3 | 15.654         | 1758762 | 30.54  |
| 4 | 16.715         | 1124420 | 19.52  |

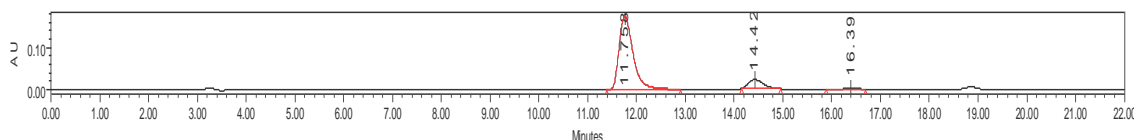

|   | Retention Time | Area    | % Area |
|---|----------------|---------|--------|
| 1 | 11.758         | 3461663 | 87.56  |
| 2 | 14.423         | 456104  | 11.54  |
| 3 | 16.393         | 35843   | 0.91   |

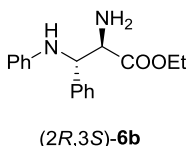

**Ethyl (2*R*,3*S*)-2-amino-3-phenyl-3-(phenylamino)propanoate [(2*R*,3*S*)-6b]: Procedure C:** 29% yield over two step,  $R_f = 0.4$  (petroleum ether/ethyl acetate = 1/1); Dissolved in iPrOH for HPLC; **HPLC** (Chiralcel IH, hexane/iPrOH = 90/10, flow rate 1.0 mL/min,  $\lambda = 254$  nm); major isomer:  $t_r$  (major) = 15.62 min,  $t_r$  (minor) = 11.62 min, ee = 91%; minor isomer:  $t_r$  (major) = 16.94 min,  $t_r$  (minor) = 14.12 min, ee = 91%. dr = 82:18 determined by  $^1\text{H NMR}$ .  $[\alpha]_D^{29} = -58.1$  ( $c = 0.24$ , in tetrahydrofuran).  $^1\text{H NMR}$  (400 MHz,  $\text{CDCl}_3$ )  $\delta$  7.46 – 7.15 (m, 6H), 7.08 – 7.03 (m, 2H), 6.64 – 6.59 (m, 1H), 6.54 – 6.51 (m, 2H), 5.08 (s, 1H), 4.87 – 4.84 (m, 1H), 4.13 (q,  $J = 6.8$  Hz, 2H), 3.90 (d,  $J = 3.6$  Hz, 1H), 1.16 (t,  $J = 7.2$  Hz, 3H) ppm;  $^{13}\text{C}\{^1\text{H}\}$  NMR (101 MHz,  $\text{CDCl}_3$ )  $\delta$  172.8, 146.9, 140.2, 129.0, 128.7, 127.4, 126.9, 117.4, 113.7, 61.4, 59.6, 59.3, 14.1 ppm.

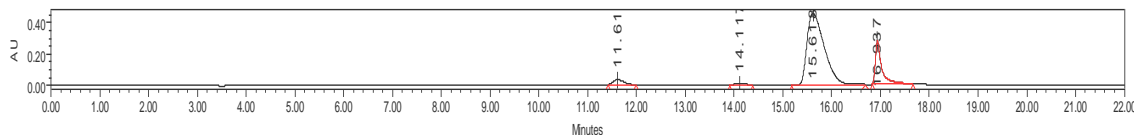

|   | Retention Time | Area     | % Area |
|---|----------------|----------|--------|
| 1 | 11.615         | 543218   | 3.72   |
| 2 | 14.117         | 141431   | 0.97   |
| 3 | 15.618         | 11418949 | 78.19  |
| 4 | 16.937         | 2499682  | 17.12  |

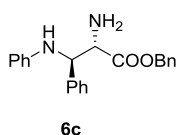

**Benzyl (2*S*,3*R*)-2-amino-3-phenyl-3-(phenylamino)propanoate (6c): Procedure C:** 60% yield over two step, White solid; **m.p.:** 108.3 – 114.7;  $R_f = 0.4$  (petroleum ether/ethyl acetate = 1/1); Dissolved in iPrOH for HPLC; **HPLC** (Chiralcel IH, hexane/iPrOH = 90/10, flow rate 1.0 mL/min,  $\lambda = 254$  nm); major isomer:  $t_r$  (major) = 12.35

min,  $t_r$  (minor) = 14.01 min, ee = 91%; minor isomer:  $t_r$  (major) = 15.05 min,  $t_r$  (minor) = 18.51 min, ee = 93%. dr = 78:22 determined by  $^1\text{H}$  NMR.  $[\alpha]_D^{27} = +11.1$  ( $c = 0.32$ , in tetrahydrofuran).  $^1\text{H}$  NMR (400 MHz,  $\text{CDCl}_3$ )  $\delta$  7.32 – 7.12 (m, 12H), 7.03 – 6.98 (m, 2H), 6.60 – 6.50 (m, 1H), 6.48 – 6.42 (m, 2H), 5.15 – 4.98 (m, 3H), 4.86 – 4.82 (m, 1H), 3.92 (d,  $J = 3.6$  Hz, 1H) ppm;  $^{13}\text{C}\{^1\text{H}\}$  NMR (101 MHz,  $\text{CDCl}_3$ )  $\delta$  172.6, 146.8, 140.0, 135.3, 129.1, 128.7, 128.5, 128.3, 128.1, 127.5, 126.9, 117.5, 113.8, 67.1, 59.6, 59.1. ppm; IR (neat)  $\nu$  ( $\text{cm}^{-1}$ ): 3380, 2924, 2853, 1736, 1602, 1504, 1454, 1180, 1028, 749, 696; HRMS (ESI-FT) calcd for  $\text{C}_{22}\text{H}_{23}\text{N}_2\text{O}_2^+$  ( $[\text{M}+\text{H}^+]$ ) = 347.1754, found 347.1758.

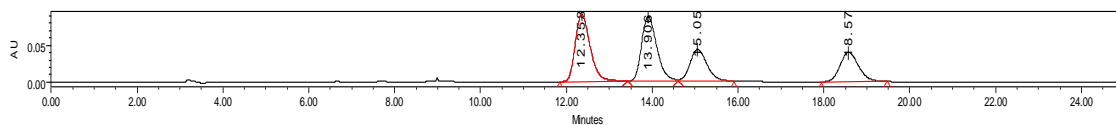

|   | Retention Time | Area    | % Area |
|---|----------------|---------|--------|
| 1 | 12.358         | 2226367 | 32.61  |
| 2 | 13.906         | 2210088 | 32.37  |
| 3 | 15.057         | 1194210 | 17.49  |
| 4 | 18.573         | 1196723 | 17.53  |

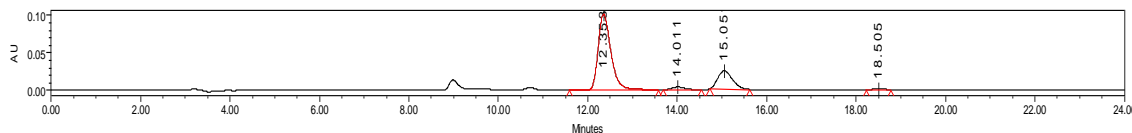

|   | Retention Time | Area    | % Area |
|---|----------------|---------|--------|
| 1 | 12.353         | 2017618 | 75.33  |
| 2 | 14.011         | 82932   | 3.10   |
| 3 | 15.051         | 553537  | 20.67  |
| 4 | 18.505         | 24266   | 0.91   |

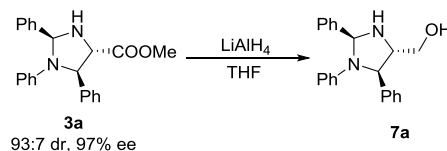

To a solution of **3a** (35.7 mg, 0.10 mmol, dr value was determined by  $^1\text{H}$  NMR) in THF (1.0 mL) was added  $\text{LiAlH}_4$  (11 mg, 0.30 mmol) at 0 °C. After stirring for 60 minutes at 0 °C, the reaction mixture was allowed to warm to room temperature for an additional 2 h. Then, the reaction mixture was diluted with  $\text{Et}_2\text{O}$  and cooled to 0 °C.  $\text{H}_2\text{O}$  (10.0  $\mu\text{L}$ ), 15%  $\text{NaOH}$  (aq. 10.0  $\mu\text{L}$ ) and  $\text{H}_2\text{O}$  (30.0  $\mu\text{L}$ ) were added, the reaction mixture was allowed to warm to room temperature to stir for 15 minutes. The mixture was dried over  $\text{Mg}_2\text{SO}_4$ , filtered and evaporated in vacuo, and was subjected to column chromatography on silica gel and eluted with petroleum ether/ethyl acetate (5/1 to 2/1, v/v).

**[(2S,4S,5R)-1,2,5-Triphenylimidazolidin-4-yl]methanol (7a)**: 64% yield, Colorless oil;  $R_f = 0.3$  (petroleum ether/ethyl acetate = 2/1); Dissolved in  $i\text{PrOH}$  for HPLC; HPLC (Chiralcel ASH, hexane/ $i\text{PrOH}$  = 90/10, flow rate 1.0 mL/min,  $\lambda = 254$  nm) major isomer:  $t_r$  (major) = 12.94 min,  $t_r$  (minor) = 18.44 min, ee = 95%. dr = 96:4 determined by  $^1\text{H}$  NMR.  $[\alpha]_D^{24} = -41.2$  ( $c = 0.25$ , in tetrahydrofuran).  $^1\text{H}$  NMR (400 MHz,  $\text{CDCl}_3$ )  $\delta$  7.70 – 7.66 (m, 2H), 7.55 – 7.50 (m, 2H), 7.45 – 7.23 (m, 7H), 7.11 – 7.03 (m, 2H), 6.74 – 6.69 (m, 1H), 6.51 – 6.47 (m, 2H), 5.52 (s, 1H), 4.50 (d,  $J = 4.4$  Hz, 1H), 3.75 (dd,  $J = 11.1, 4.8$  Hz, 1H), 3.66 (dd,  $J = 11.2, 7.6$  Hz, 1H), 3.44 – 3.38 (m, 1H), 2.39 (s, 1H) ppm;  $^{13}\text{C}\{^1\text{H}\}$  NMR (101 MHz,  $\text{CDCl}_3$ )  $\delta$  147.2, 142.8, 141.0, 128.9, 128.8, 128.8, 128.3, 127.4, 126.9, 126.1, 118.2, 114.6, 78.9, 68.1, 67.3, 61.2 ppm; IR (neat)  $\nu$  ( $\text{cm}^{-1}$ ): 3310, 2925, 1599, 1501, 1453, 1332, 1029, 996, 751, 695; HRMS (ESI-FT) calcd for  $\text{C}_{22}\text{H}_{23}\text{N}_2\text{O}^+$  ( $[\text{M}+\text{H}^+]$ ) = 331.1805, found 331.1805.

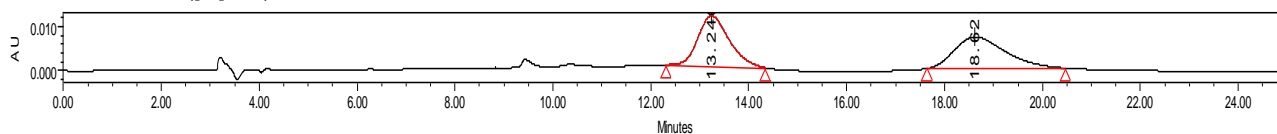

|   | Retention Time | Area   | % Area |
|---|----------------|--------|--------|
| 1 | 13.240         | 511482 | 49.63  |

|   |        |        |       |
|---|--------|--------|-------|
| 2 | 18.622 | 519100 | 50.37 |
|---|--------|--------|-------|

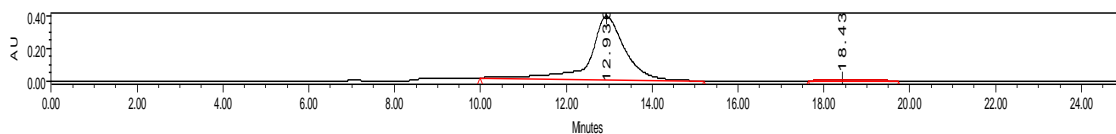

|   | Retention Time | Area     | % Area |
|---|----------------|----------|--------|
| 1 | 12.936         | 21737505 | 97.58  |
| 2 | 18.435         | 540004   | 2.42   |

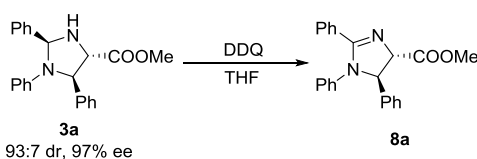

To a solution of **3a** (17.9 mg, 0.05 mmol, dr value was determined by  $^1\text{H NMR}$ ) in THF (1.5 mL) was added DDQ (11.4 mg, 0.05 mmol) at room temperature. The reaction mixture was stirred at room temperature for 10 min. The mixture was partitioned between ethyl acetate and water, then the organic layer was washed with brine, dried over  $\text{MgSO}_4$ , filtered and evaporated in vacuo, and was subjected to column chromatography on silica gel and eluted with petroleum ether/ethyl acetate (4/1 to 1/1, v/v).

**Methyl (4S,5R)-1,2,5-triphenyl-4,5-dihydro-1H-imidazole-4-carboxylate (8a):** 68% yield, Colorless oil;  $R_f = 0.4$  (petroleum ether/ethyl acetate = 1/1); Dissolved in iPrOH for HPLC; **HPLC** (Chiralcel IF, hexane/iPrOH = 90/10, flow rate 1.0 mL/min,  $\lambda = 254$  nm) major isomer:  $t_r$  (major) = 20.36 min,  $t_r$  (minor) = 15.18 min, ee = 95%. dr > 96:4 determined by  $^1\text{H NMR}$ .  $[\alpha]_D^{24} = -600.0$  ( $c = 0.18$ , in tetrahydrofuran).  $^1\text{H NMR}$  (400 MHz,  $\text{CDCl}_3$ )  $\delta$  7.66 – 7.61 (m, 2H), 7.46 – 7.37 (m, 5H), 7.33 – 7.26 (m, 3H), 7.10 – 6.96 (m, 3H), 6.80 – 6.72 (m, 2H), 5.29 (d,  $J = 6.8$  Hz, 1H), 4.72 (d,  $J = 6.8$  Hz, 1H), 3.83 (s, 3H) ppm;  $^{13}\text{C}\{^1\text{H}\}$  NMR (101 MHz,  $\text{CDCl}_3$ )  $\delta$  172.1, 164.6, 142.4, 142.1, 130.4, 130.3, 129.3, 129.0, 128.8, 128.1, 128.1, 126.7, 125.1, 124.5, 76.6, 71.8, 52.6 ppm; **IR** (neat)  $\nu$  ( $\text{cm}^{-1}$ ): 2951, 1740, 1594, 1570, 1495, 1451, 1384, 1227, 1033, 765, 698; **HRMS** (ESI-FT) calcd for  $\text{C}_{23}\text{H}_{21}\text{N}_2\text{O}_2^+$  ( $[\text{M}+\text{H}^+]$ ) = 357.1598, found 357.1594.

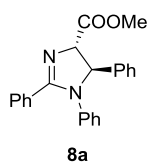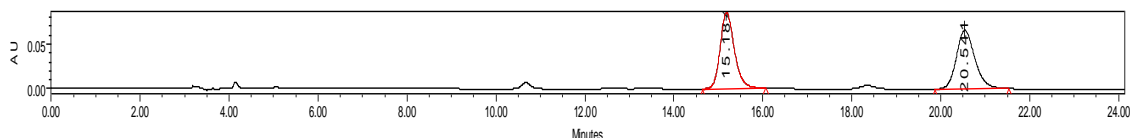

|   | Retention Time | Area    | % Area |
|---|----------------|---------|--------|
| 1 | 15.184         | 1904639 | 50.01  |
| 2 | 20.541         | 1904067 | 49.99  |

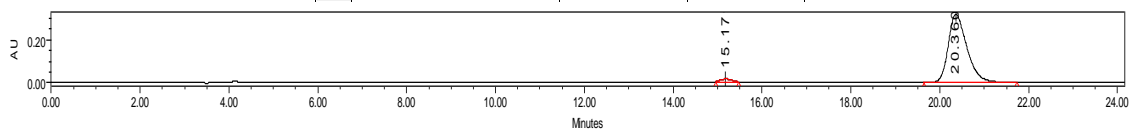

|   | Retention Time | Area    | % Area |
|---|----------------|---------|--------|
| 1 | 15.179         | 230205  | 2.40   |
| 2 | 20.360         | 9355023 | 97.60  |

## (G) Procedure for React IR Experiment for Kinetic Studies

Kinetic analyses were performed using in situ attenuated total reflectance Fouriertransform infrared (ATR FTIR) spectroscopy to track the formation of product **3g** under synthetically relevant conditions. A Mettler Toledo ReactIR 15 was treated as main experiment equipment. All of the kinetic experiments on each plot were performed using a single batch of reagents.

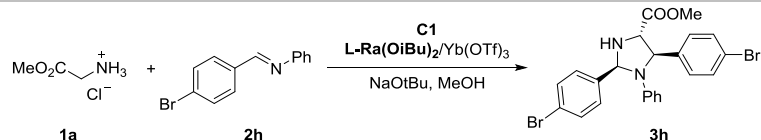

A three-necked reaction tube was charge with methyl glycine hydrochloride **1a** (0.5 mmol), Yb(OTf)<sub>3</sub> (10 mol%), **L-Ra(OiBu)<sub>2</sub>** (10 mol%), NaOtBu (0.5 mmol). Picolinaldehyde (**C1**, 20 mol%) and MeOH (3.5 mL) were added in succession. The mixture was stirred at 35 °C for 30 min, and imine **2h** (1.25 mmol) was added at 35 °C and the IR data collection was started. The React IR spectra were recorded over the process of the reaction. ConclIRT Spectrum of the **3h** with peak at 1502 cm<sup>-1</sup> was selected to acquire kinetic data.

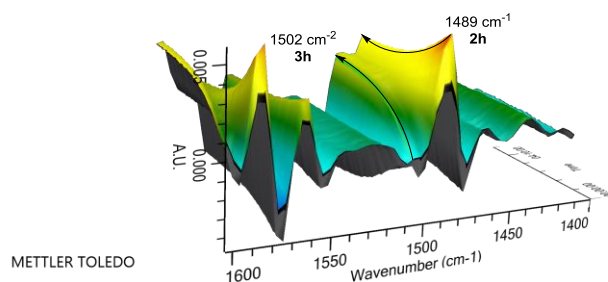

Figure S4. 3D ATR-FTIR Profile of the Recorded over the Reaction of **2h** and **3h**

## 1. Dependence of the reaction rate on concentration of **L-Ra(OiBu)<sub>2</sub>/Yb(OTf)<sub>3</sub>** catalyst

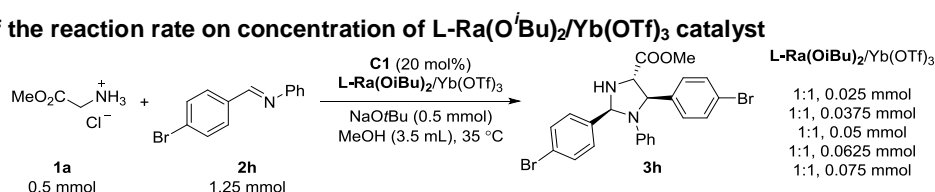

Kinetic profiles of different initial concentration of **L-Ra(OiBu)<sub>2</sub>/Yb(OTf)<sub>3</sub>** (from 0.007142857 M to 0.021428571 M), The plot of  $k_{obs}$  vs **[L-Ra(OiBu)<sub>2</sub>/Yb(OTf)<sub>3</sub>]** displayed a liner relationship in **[L-Ra(OiBu)<sub>2</sub>/Yb(OTf)<sub>3</sub>]**, which indicates a first-order kinetic dependence in **[L-Ra(OiBu)<sub>2</sub>/Yb(OTf)<sub>3</sub>]**.

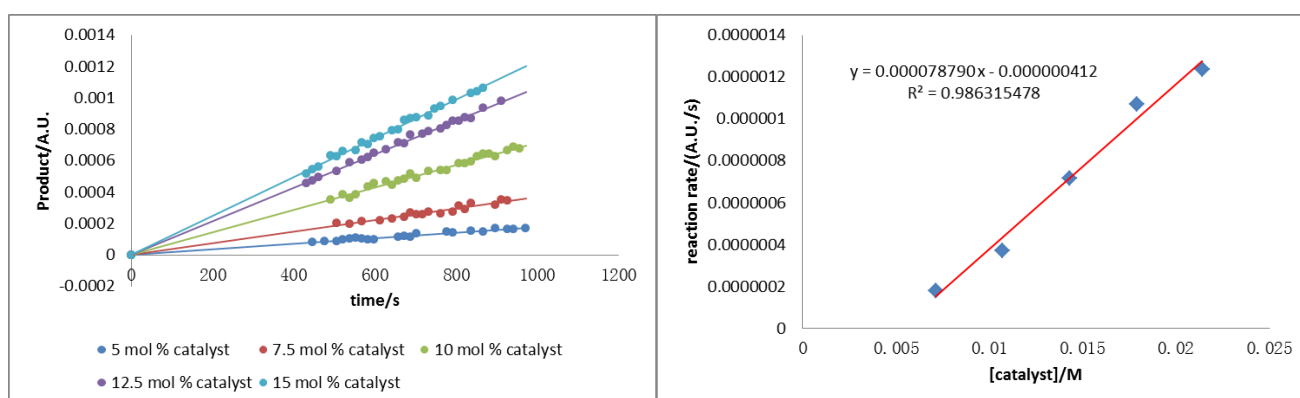

| <b>[L-Ra(OiBu)<sub>2</sub>/Yb(OTf)<sub>3</sub>]/M</b> | reaction rate/(A.U./s) |
|-------------------------------------------------------|------------------------|
| 0.007142857                                           | 0.00000178             |
| 0.010714286                                           | 0.00000369             |
| 0.014285714                                           | 0.00000717             |
| 0.017857142                                           | 0.00001068             |
| 0.021428571                                           | 0.00001235             |

## 2. Dependence of the reaction rate on concentration of picolinaldehyde (**C1**)



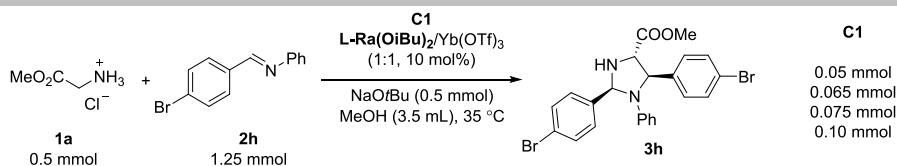

Kinetic profiles of different initial concentration of **C1** (from 0.014285714 M to 0.028571429 M), The plot of  $k_{obs}$  vs **[C1]** displayed a liner relationship in **[C1]**, which indicates a first-order kinetic dependence in **[C1]**.

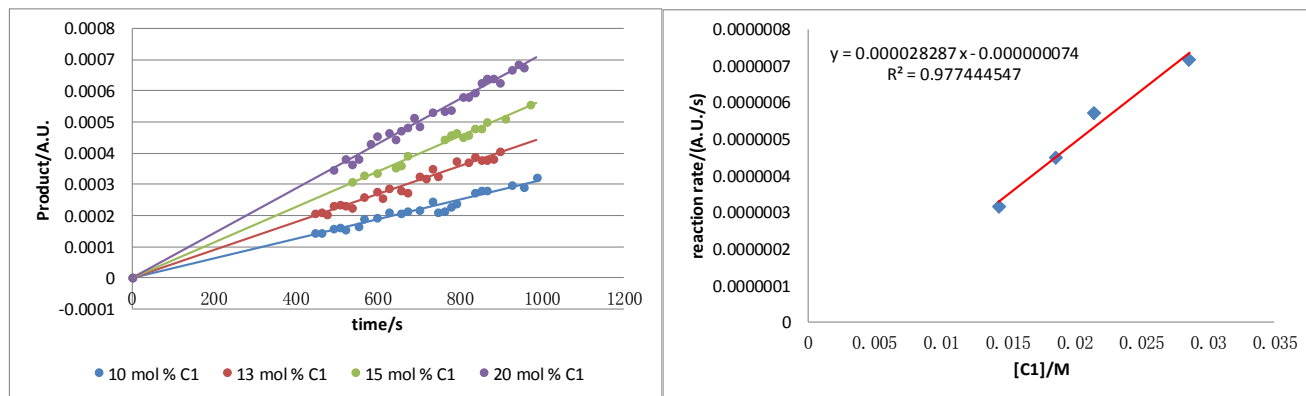

| <b>[C1]/M</b> | reaction rate/(A.U./s) |
|---------------|------------------------|
| 0.014285714   | 0.000000314            |
| 0.018571429   | 0.000000448            |
| 0.021428571   | 0.000000570            |
| 0.028571429   | 0.000000717            |

### 3. Dependence of the reaction rate on concentration of **1a**

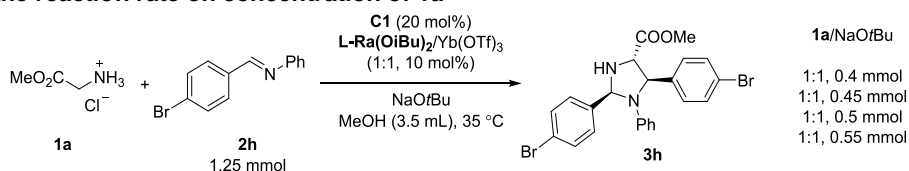

Kinetic profiles of different initial concentration of **1a** (from 0.114285714 M to 0.157142857 M), The plot of  $k_{obs}$  vs **[1a]** displayed a liner relationship in **[1a]**, which indicates a first-order kinetic dependence in **[1a]**.

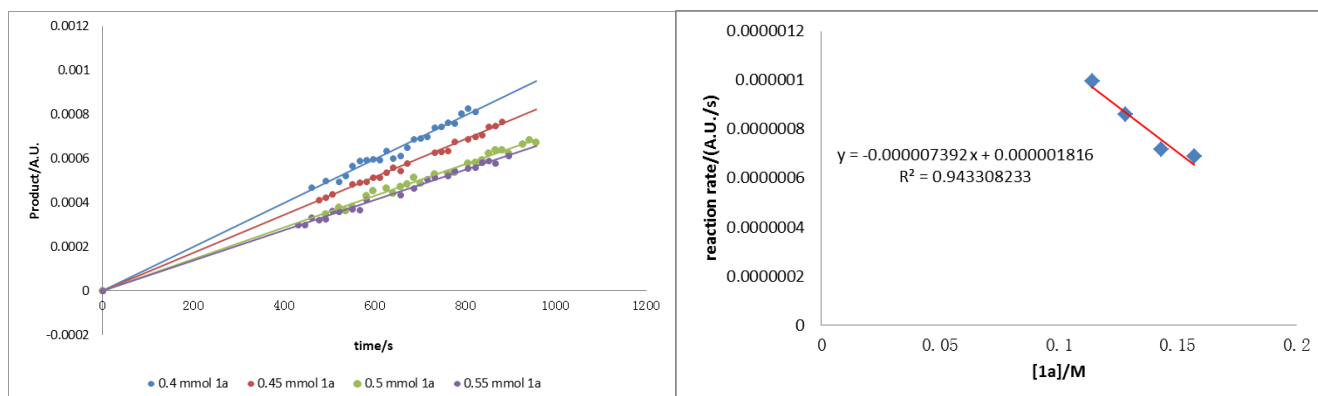

| <b>[1a]/M</b> | reaction rate/(A.U./s) |
|---------------|------------------------|
| 0.114285714   | 0.000000995            |
| 0.128571429   | 0.000000859            |

|             |             |
|-------------|-------------|
| 0.142857143 | 0.000000717 |
| 0.157142857 | 0.000000688 |

#### 4. Dependence of the reaction rate on concentration of **2h**

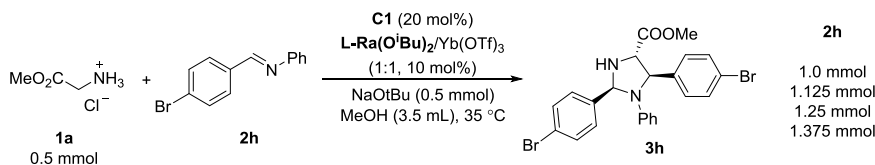

Kinetic profiles of different initial concentration of **2h** (from 0.285714286 M to 0.392857143 M), The plot of  $k_{obs}$  vs [**2h**] displayed a liner relationship in [**2h**], which indicates a first-order kinetic dependence in [**2h**].

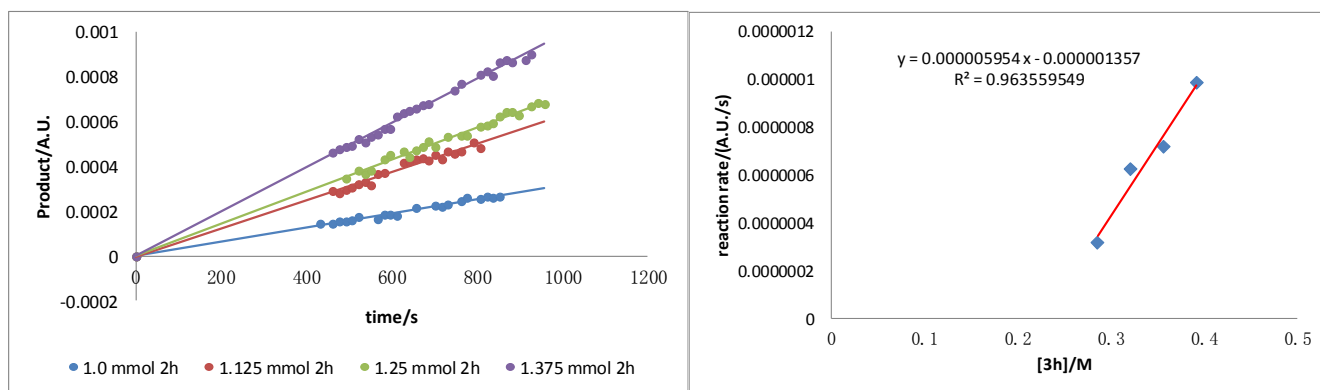

| [ <b>2h</b> ]/M | reaction rate/(A.U./s) |
|-----------------|------------------------|
| 0.285714286     | 0.000000316            |
| 0.321428571     | 0.000000623            |
| 0.357142857     | 0.000000717            |
| 0.392857143     | 0.000000988            |

## (H) Control Experiments and HRMS Analysis

### 1. Control experiments

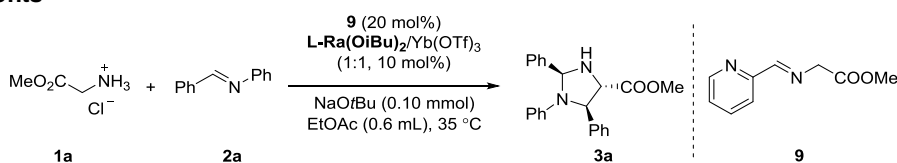

The reaction was conducted with **1a** (12.6 mg, 0.10 mmol), Yb(OTf)<sub>3</sub> (6.2 mg, 10 mol%), **L-Ra(O<sup>i</sup>Bu)<sub>2</sub>** (8.2 mg, 10 mol%), **9** (20 mol%), NaO<sup>t</sup>Bu (9.6 mg, 0.10 mmol) and EtOAc (0.60 mL). The mixture was stirred at 35 °C for 15 min, and imine **2a** (36.0 mg, 0.20 mmol) was added at 35 °C. The resulting mixture was stirred at 35 °C for 24 hours. The reaction mixture was subjected to column chromatography on silica gel to afford the corresponding product **3a**.

The results of the reaction suggested that Schiff-base **9** was probably a key intermediate in this reaction.

| entry | condition                               | yield (%) <sup>b</sup> | dr <sup>c</sup> | ee (%) <sup>c</sup> |
|-------|-----------------------------------------|------------------------|-----------------|---------------------|
| 1     | none                                    | 31                     | 93:7            | 96                  |
| 2     | at 50 °C                                | 41                     | 80:20           | 79/80               |
| 3     | with 5 μL (26.0 equiv) H <sub>2</sub> O | 39                     | 84:16           | 96/91               |

4 with 5  $\mu$ L (8.0 equiv) EtOH 42 92:8 96

<sup>a</sup> Unless otherwise noted, all reactions were carried out with **1a** (0.10 mmol), **2a** (0.20 mmol), NaOtBu (0.10 mmol), **9**, and **L-Ra(OiBu)<sub>2</sub>/Yb(OTf)<sub>3</sub>** (1:1, 10 mol%) in EtOAc (0.60 mL) at 35 °C for 24 h. <sup>b</sup> Isolated yield of **3a** based on **1a**. <sup>c</sup> Determined by HPLC on a chiral stationary phase.

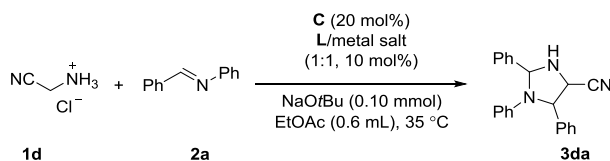

The change from ester group to nitrile group performed poor results, highlighting the significant role of the carboxylate in mediating the reactivity.

| entry                | Carbonyl catalyst | L/metal salt                                                 | yield (%) <sup>b</sup> | dr <sup>c</sup> |
|----------------------|-------------------|--------------------------------------------------------------|------------------------|-----------------|
| 1                    | <b>C1</b>         | <b>L-Pi(O<sup>i</sup>Bu)<sub>2</sub>/Yb(OTf)<sub>3</sub></b> | <3                     | N.D.            |
| 2                    | <b>C1</b>         | <b>L-Ra(O<sup>i</sup>Bu)<sub>2</sub>/Yb(OTf)<sub>3</sub></b> | <3                     | N.D.            |
| <b>3<sup>d</sup></b> | <b>C9</b>         | <b>rac-PiPr<sub>2</sub>/Yb(OTf)<sub>3</sub></b>              | 10                     | 85:15           |

<sup>a</sup> Unless otherwise noted, all reactions were carried out with **1d** (0.10 mmol), **2a** (0.20 mmol), NaOtBu (0.10 mmol), **C** (10 mol%) and **L/metal salt** (1:1, 10 mol%) in EtOAc (0.60 mL) at 35 °C for 48 h; N.D. = no determined. <sup>b</sup> Isolated yield of **3da** based on **1d**. <sup>c</sup> Determined by <sup>1</sup>H NMR. <sup>d</sup> Et<sub>3</sub>N (0.11 mmol) was used in CH<sub>2</sub>Cl<sub>2</sub> (0.60 mL) for 24 h..

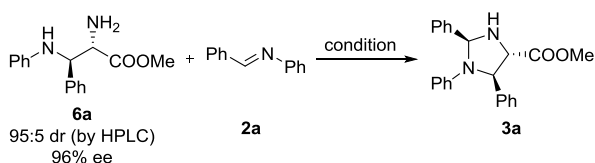

The reaction was conducted with **6a** (27.0 mg, 0.10 mmol), imine **2a** (18.0 mg, 0.10 mmol), dissolved in EtOAc (0.60 mL). The resulting mixture was stirred at 35 °C for 24 hours. The reaction mixture was subjected to column chromatography on silica gel to afford the corresponding product **3a**.

| entry | conditions                                         | yield (%) <sup>a</sup> | dr <sup>b</sup> | ee (%) <sup>c</sup> |
|-------|----------------------------------------------------|------------------------|-----------------|---------------------|
| 1     | none                                               | 46                     | 94:6            | 96                  |
| 2     | with 10 mol% Yb(OTf) <sub>3</sub>                  | 64                     | 94:6            | 96                  |
| 3     | with 10 mol% <b>L-Ra(OiBu)<sub>2</sub>/Yb(OTf)</b> | 51                     | 96:4            | 97                  |

<sup>a</sup> Isolated yield of **3a** based on **1a**. <sup>b</sup> Determined by HPLC on a chiral stationary phase.

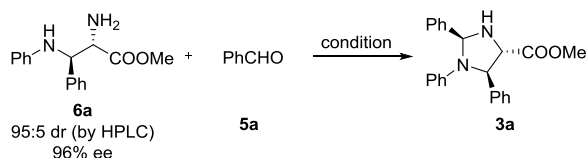

The reaction was conducted with **6a** (27.0 mg, 0.10 mmol), benzaldehyde **5a** (10.0  $\mu$ L, 0.10 mmol), dissolved in EtOAc (0.60 mL). The resulting mixture was stirred at 35 °C for 24 hours. The reaction mixture was subjected to column chromatography on silica gel to afford the corresponding product **3a**.

These results clearly indicated that imidazolidine **3a** was yielded through the condensation of initial Mannich product **6a** with benzaldehyde generated from the decomposition of imine **2a** in the catalytic reaction.

| entry | condition | yield (%) <sup>a</sup> | dr <sup>b</sup> | ee (%) <sup>b</sup> |
|-------|-----------|------------------------|-----------------|---------------------|
| 1     | none      | 26                     | 95:5            | 96                  |

|   |                                                     |    |      |    |
|---|-----------------------------------------------------|----|------|----|
| 2 | with 10 mol% Yb(OTf) <sub>3</sub>                   | 37 | 95:5 | 96 |
| 3 | with 10 mol% <b>L-Ra(OiBu)<sub>2</sub></b> /Yb(OTf) | 90 | 95:5 | 97 |

<sup>a</sup> Isolated yield of **3a** based on **1a**. <sup>b</sup> Determined by HPLC on a chiral stationary phase.

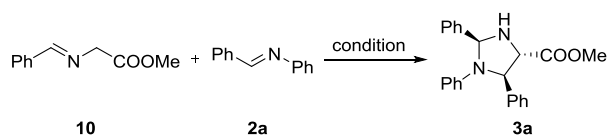

The reaction was conducted with **10** (17.7 mg, 0.10 mmol), Yb(OTf)<sub>3</sub> (6.2 mg, 10 mol%), **L-Ra(OiBu)<sub>2</sub>** (8.2 mg, 10 mol%) and EtOAc (0.60 mL). The mixture was stirred at 35 °C for 15 min, and imine **2a** (18.0 mg, 0.10 mmol) was added at 35 °C. The resulting mixture was stirred at 35 °C for 24 hours. The reaction mixture was subjected to column chromatography on silica gel to afford the corresponding product **3a**.

The results indicated that the [3+2] cycloaddition pathway was disfavored in this reaction condition.

| entry | condition              | yield (%) <sup>a</sup> | dr <sup>b</sup> | ee (%) <sup>b</sup> |
|-------|------------------------|------------------------|-----------------|---------------------|
| 1     | none                   | N.R.                   |                 |                     |
| 2     | with 1.0 equiv. NaOtBu | N.R.                   |                 |                     |

<sup>a</sup> Isolated yield of **3a** based on **1a**. <sup>b</sup> Determined by HPLC on a chiral stationary phase.

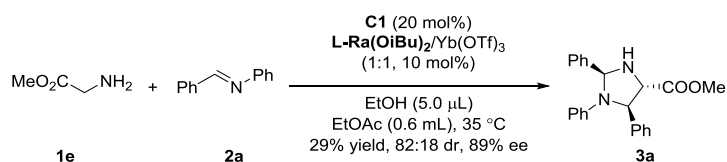

The reaction was conducted with **1e** (8.9 mg, 0.10 mmol), Yb(OTf)<sub>3</sub> (6.2 mg, 10 mol%), **L-Ra(OiBu)<sub>2</sub>** (8.2 mg, 10 mol%), **C1** (20 mol%), EtOH (5.0 μL, 8.0 equiv) and EtOAc (0.60 mL). The mixture was stirred at 35 °C for 15 min, and imine **2a** (36.0 mg, 0.20 mmol) was added at 35 °C. The resulting mixture was stirred at 35 °C for 24 hours. The reaction mixture was subjected to column chromatography on silica gel to afford the corresponding product **3a**.

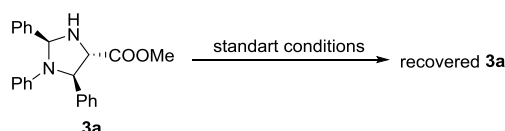

The reaction was conducted with **3a** (35.6 mg, 0.10 mmol), Yb(OTf)<sub>3</sub> (6.2 mg, 10 mol%), **L-Ra(OiBu)<sub>2</sub>** (8.2 mg, 10 mol%), EtOH (5.0 μL, 8.0 equiv) and EtOAc (0.60 mL). The mixture was stirred at 35 °C for 24 hours. The reaction mixture was subjected to column chromatography on silica gel to afford the recovered product **3a**.

The results indicated that the imidazolidine was instable under reaction conditions.

| entry | condition                      | recovery (%) <sup>a</sup> | dr <sup>b</sup> | ee (%) <sup>b</sup> |
|-------|--------------------------------|---------------------------|-----------------|---------------------|
| 1     | none                           | 80                        | 94:6            | 97                  |
| 2     | with Yb(OTf) <sub>3</sub> only | 67                        | 96:4            | 96                  |
| 3     | with 1.0 equiv. NaOtBu         | 85                        | 96:4            | 97                  |

<sup>a</sup> Isolated recovery of **3a** based on **1a**. <sup>b</sup> Determined by HPLC on a chiral stationary phase.

## 2. HRMS analysis of the reaction mixture

### 2.1 HRMS analysis of the reaction mixture

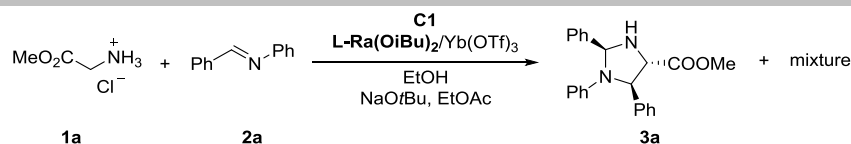

The reaction was conducted with Yb(OTf)<sub>3</sub> (6.2 mg, 10 mol%), L-Ra(OiBu)<sub>2</sub> (8.2 mg, 10 mol%), NaO<sup>t</sup>Bu (9.6 mg, 0.10 mmol), methyl glycine hydrochloride **1a** (12.6 mg, 0.10 mmol), and EtOH (5.0 μL). Picolinaldehyde (**C1**, 20 mol%) and EtOAc (0.60 mL) were added in succession. The mixture was stirred at 35 °C for 15 min, and imine **2a** (54.0 mg, 0.30 mmol) was added at 35 °C. The resulting mixture was stirred at 35 °C for 24 hours. Finally, the solution was purified by flash filtration with a thin silica gel and the mixture was directly analyzed by HRMS.

### Results:

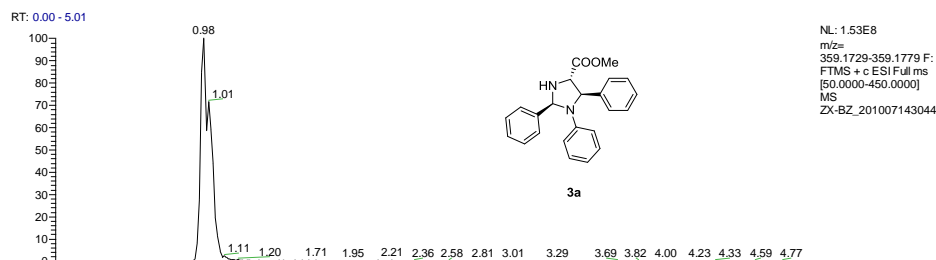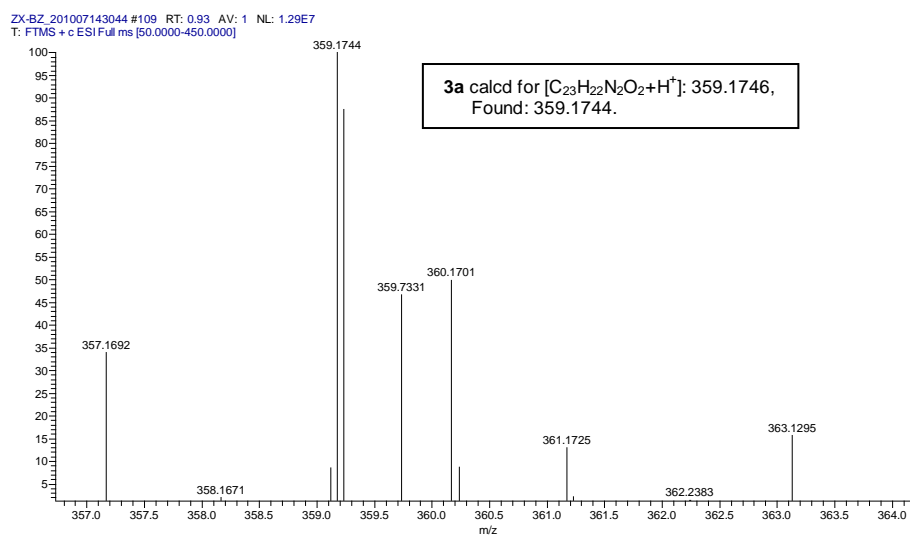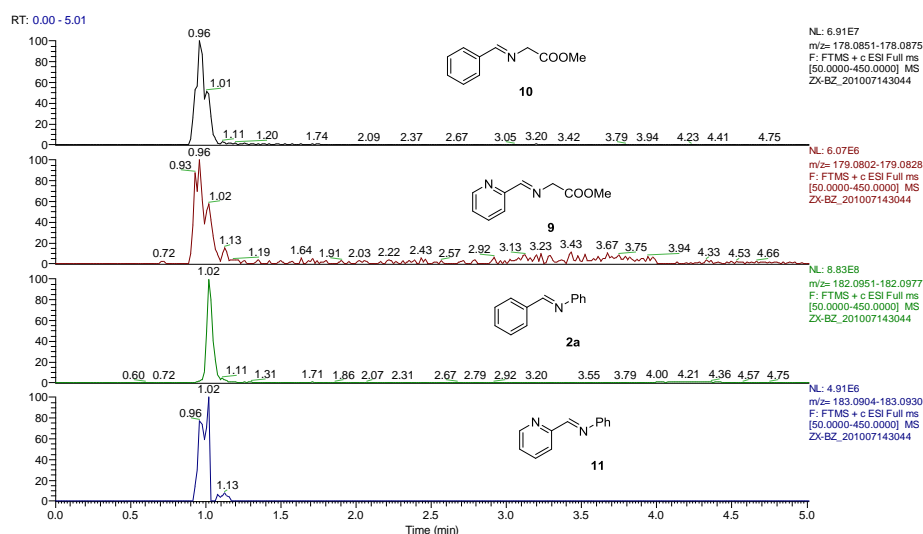

ZX-BZ\_201007143044 #111 RT: 0.95 AV: 1 NL: 3.94E7  
T: FTMS + c ESI Full ms [50.0000-450.0000]

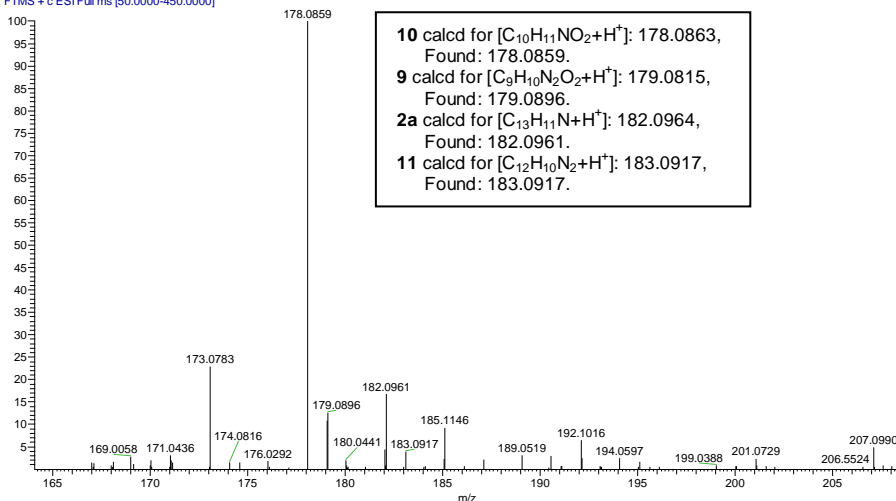

**Possible side reactions:**

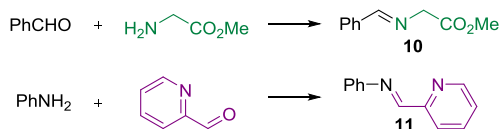

According to HRMS analysis of the reaction mixture, Schiff base **10** and picolinaldehyde-derived imine **11** might exist in the reaction system. The mass balance of imines, amines and aldehydes might be the reason for low yield.

**2.2 HRMS analysis of recycle product system**

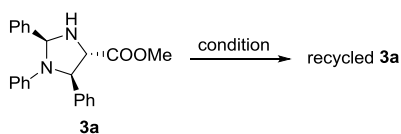

The reaction was conducted with **3a** (35.6 mg, 0.10 mmol),  $\text{Yb}(\text{OTf})_3$  (6.2 mg, 10 mol%), **L-Ra(OiBu)<sub>2</sub>** (8.2 mg, 10 mol%),  $\text{NaOtBu}$  (9.6 mg, 0.10 mmol), EtOH (5.0  $\mu\text{L}$ , 8.0 equiv) and EtOAc (0.60 mL). The mixture was stirred at 35 °C for 24 hours. Finally, the solution was purified by flash filtration with a thin silica gel and the mixture was directly analyzed by HRMS.

**Results:**

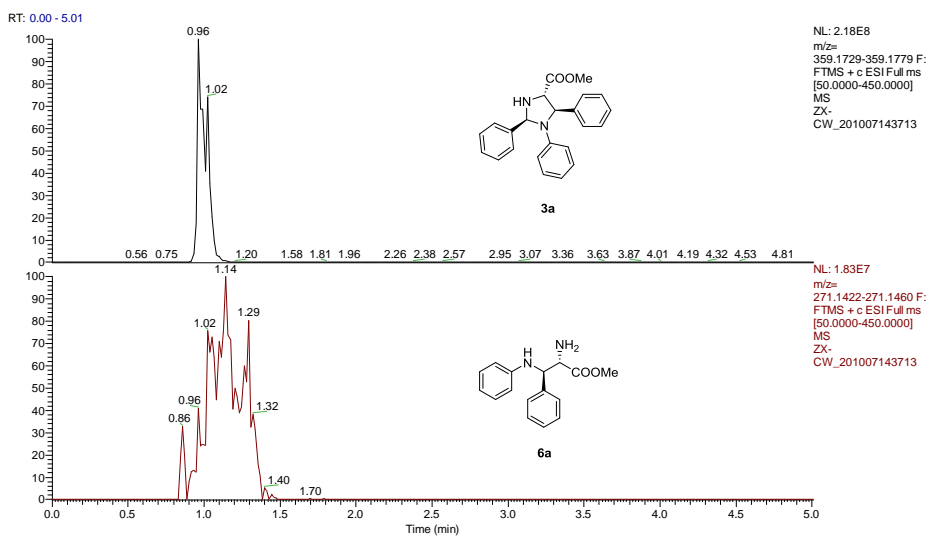

ZX-CW\_201007143713 #115 RT: 0.98 AV: 1 NL: 1.50E8  
T: FTMS + c ESI Full ms [50.0000-450.0000]

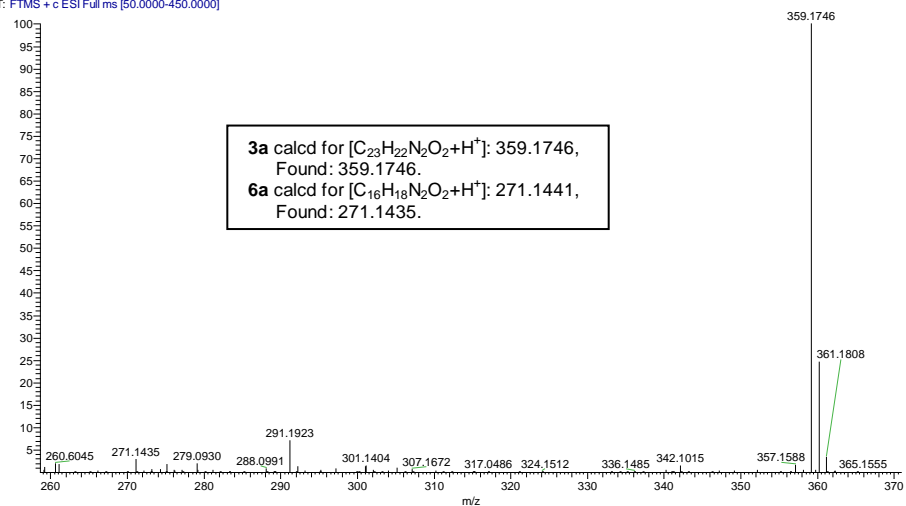

RT: 0.00 - 5.01

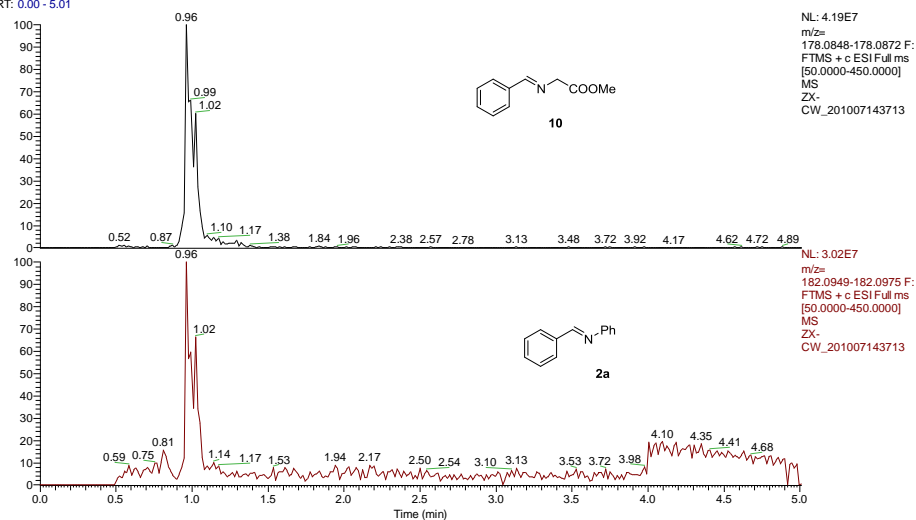

ZX-CW\_201007143713 #117 RT: 0.99 AV: 1 NL: 2.78E7  
T: FTMS + c ESI Full ms [50.0000-450.0000]

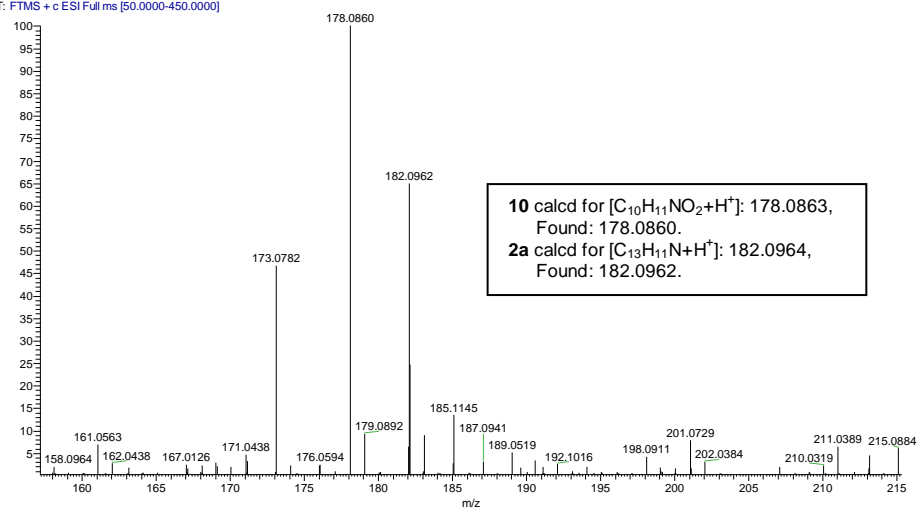

According to HRMS analysis, the product could be decomposed under the reaction and might be converted into raw material.

## (I) IR Analysis and Deuterium Labeling Experiment

### 1. IR analysis of **9**

1.1. IR spectra of **9**+Yb(OTf)<sub>3</sub> (1:1, red line) and **9** (blue line)

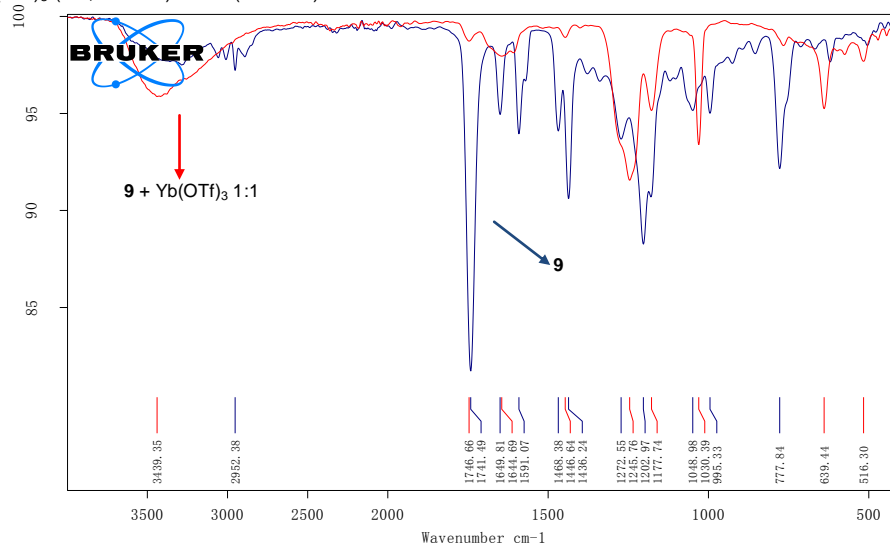

1.2. IR spectra of **9**+Yb(OTf)<sub>3</sub> (10:1, blue line) and **9** (red line)

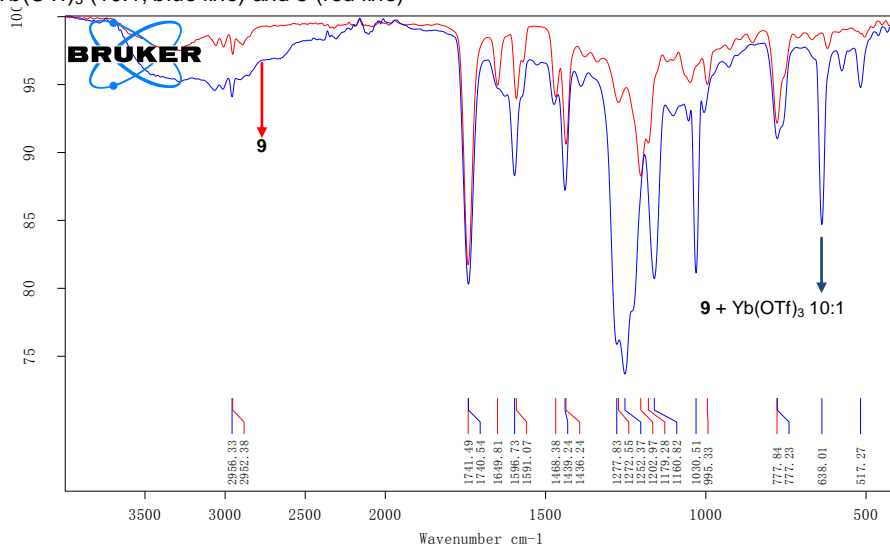

We speculated that Yb(OTf)<sub>3</sub> promote the enolization process of ester group.

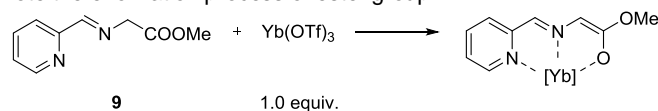

### 2. Deuterium labeling experiment

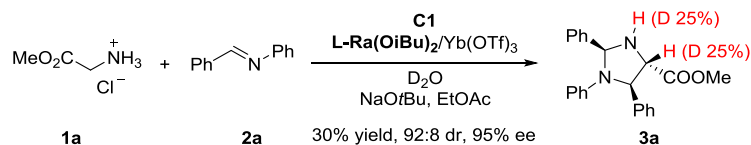

The reaction was conducted with Yb(OTf)<sub>3</sub> (6.2 mg, 10 mol%), **L-Ra(OiBu)<sub>2</sub>** (8.2 mg, 10 mol%), NaO<sup>t</sup>Bu (9.6 mg, 0.10 mmol), methyl glycine hydrochloride **1a** (12.6 mg, 0.10 mmol), and D<sub>2</sub>O (5.0 μL). Picinaldehyde (**C1**, 20 mol%) and EtOAc (0.60 mL) were added in succession. The mixture was stirred at 35 °C for 15 min, and imine **2a** (54.0 mg, 0.30 mmol) was added at 35 °C. The resulting mixture was stirred at 35 °C for 24 hours. The reaction mixture was subjected to column chromatography on silica gel to afford the corresponding product **3a**. The deuterium-labelled ratios the products were detected by <sup>1</sup>H NMR.



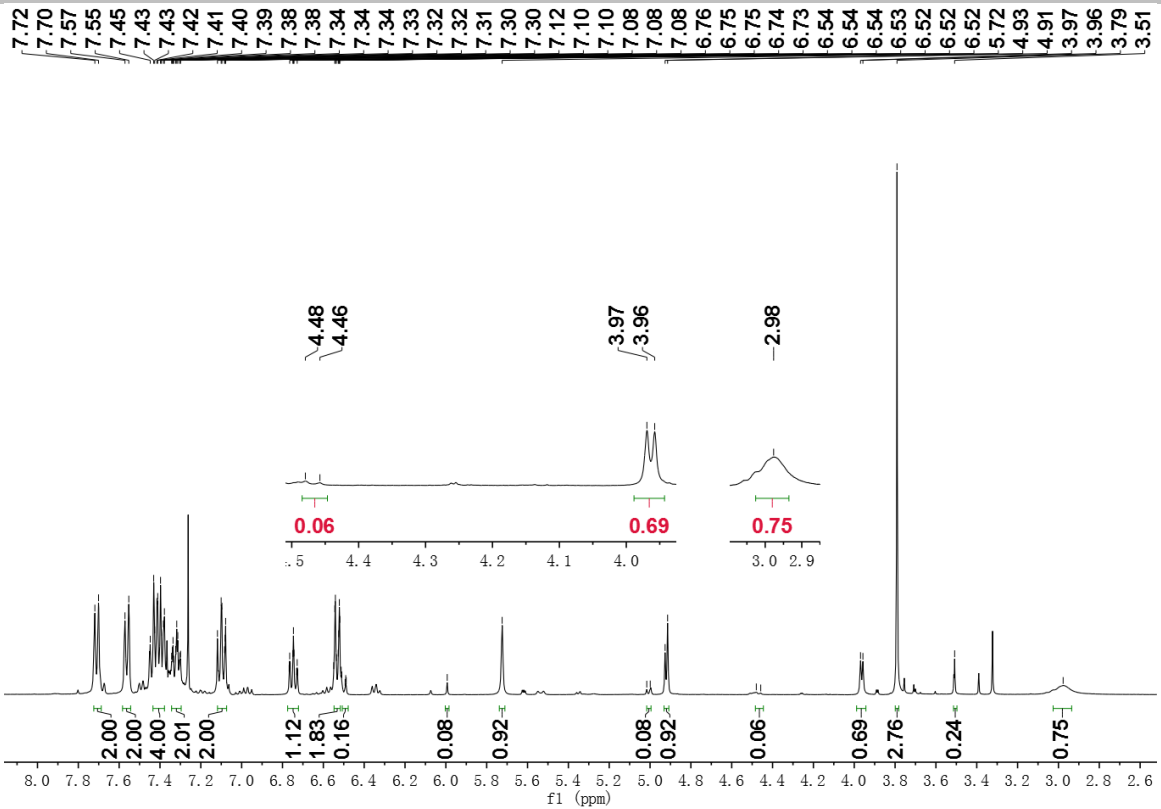

## (J) HRMS Analysis

1 The mixture of **L-Ra(OiBu)<sub>2</sub>**, Yb(OTf)<sub>3</sub> (1:1) in MeOH

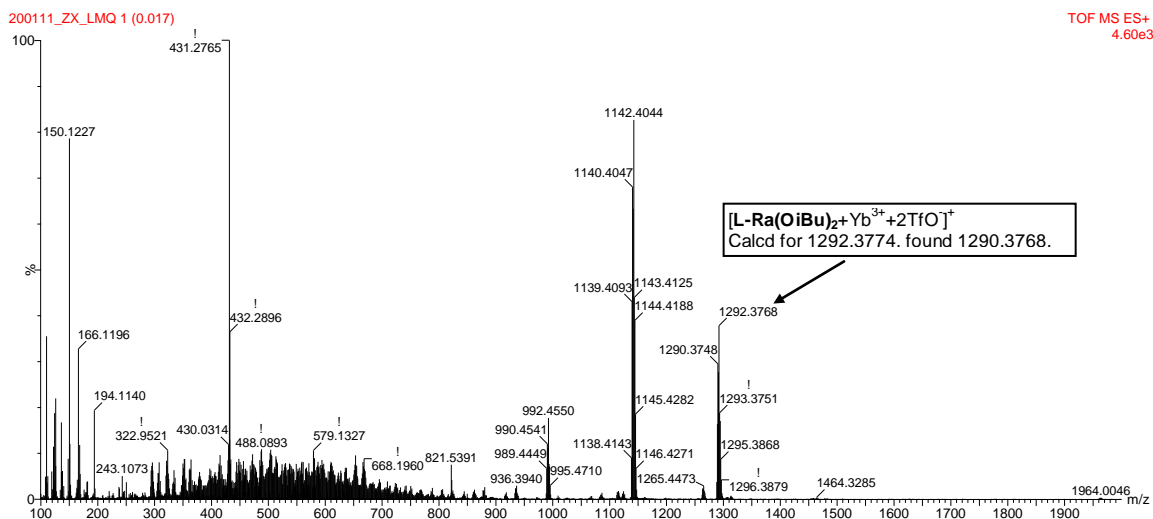

2 The mixture of **L-Ra(OiBu)<sub>2</sub>**, Yb(OTf)<sub>3</sub>, **C1, 1a**, NaOtBu (1:1:1:1) in MeOH

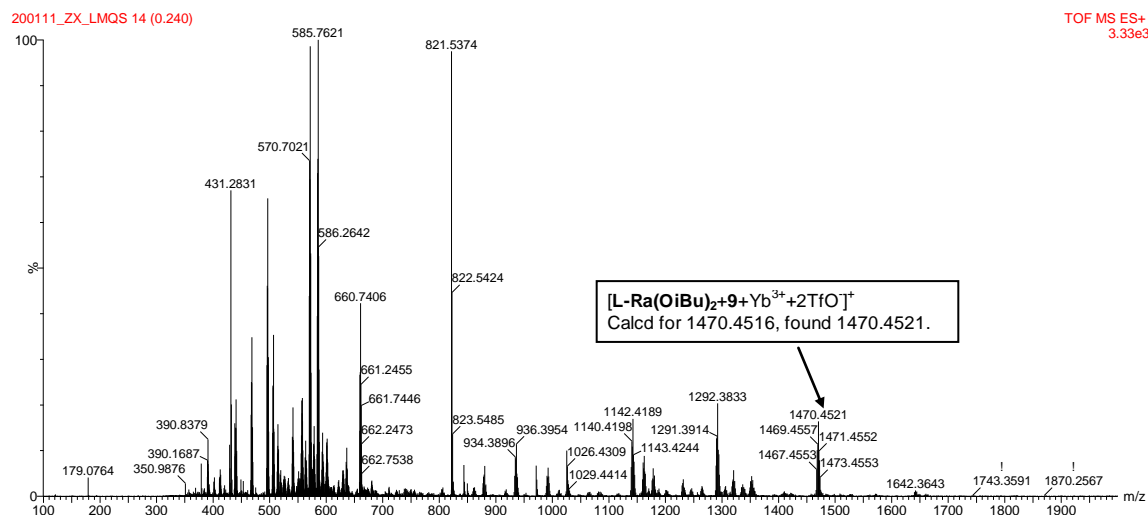

## (K) Computational Details

All the geometry optimizations and related single point energy calculations were performed by Gaussian 09<sup>4</sup> at the B3LYP<sup>5</sup> level of density functional theory with consideration of the Grimme's dispersion correction<sup>6</sup>. For basis set, the relativistic effective core potential MWB59<sup>7</sup> for Ytterbium atom, and the rest atoms C, H, O, N, F and S were used in the 6-31G(d) basis set<sup>8</sup>. Frequency calculations on the same theoretical level were obtained to confirm local minimum structures (no imaginary frequency) or transition states (only one imaginary frequency). The single point energies were further estimated using relativistic effective core potential MWB59 for Ytterbium atom and a larger basis set 6-311+G(d,p) for all other atoms with the SMD solvation model.<sup>9</sup> The experimental solvent ethanol was used in our solvent correction. The CYLview software<sup>10</sup> were used to illustrate all the 3D structures.

**Table S10.** Electronic Energy and imaginary vibrational frequency of calculated structures. E: Optimized electronic energy. E<sub>SMD</sub>: Single point energy with SMD model. The unit of energy and frequency is in Hartree and cm<sup>-1</sup>, respectively.

|                                                                                     |                                                                           |
|-------------------------------------------------------------------------------------|---------------------------------------------------------------------------|
| 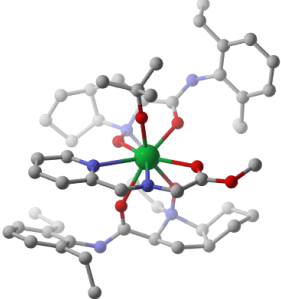   | E= -2920.801507<br>E <sub>SMD</sub> = -2921.738239                        |
| -----                                                                               |                                                                           |
|   | E= -2920.807476<br>E <sub>SMD</sub> = -2921.73952                         |
| -----                                                                               |                                                                           |
|  | E= -3711.308938<br>E <sub>SMD</sub> = -3712.46462<br>Frequency = -147.96  |
| -----                                                                               |                                                                           |
|  | E= -3711.267676<br>E <sub>SMD</sub> = -3712.443761<br>Frequency = -201.63 |
| -----                                                                               |                                                                           |

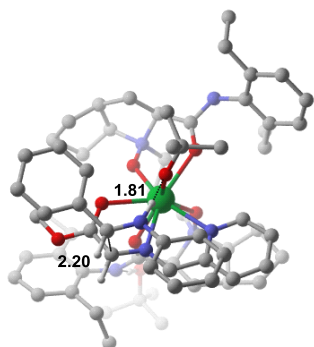

**2S3S-TS**

E= -3711.298452  
E<sub>SMD</sub>= -3712.459719  
Frequency = -181.23

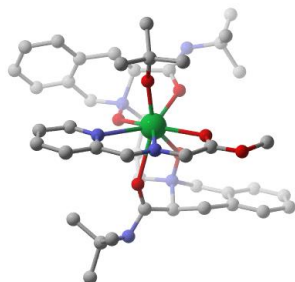

**L-TQfBu/Yb-Re**

E= -2608.696608  
E<sub>SMD</sub>= -2609.55191

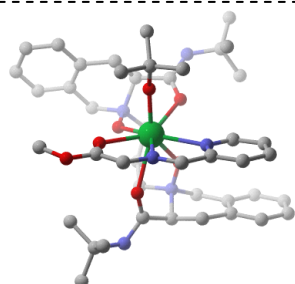

**L-TQfBu/Yb-Si**

E= -2608.693725  
E<sub>SMD</sub>= -2609.54919

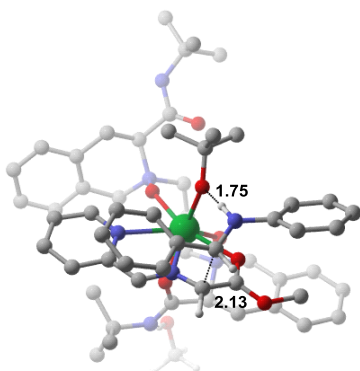

**2R3S-TS-dis**

E= -3281.195274  
E<sub>SMD</sub>= -3282.250327  
Frequency = -227.23

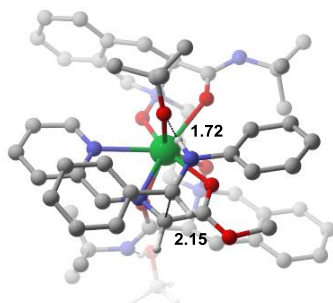

**2R3S-TS-co**

E= -3281.204233  
E<sub>SMD</sub>= -3282.253999  
Frequency = -167.42

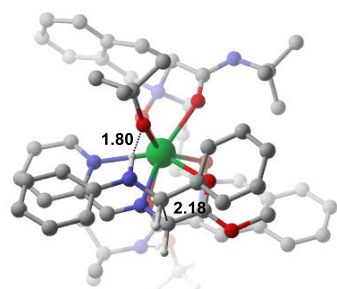

**2R3R-TS-co**

$E = -3281.195765$   
 $E_{\text{SMD}} = -3281.195765$   
 Frequency = -201.36

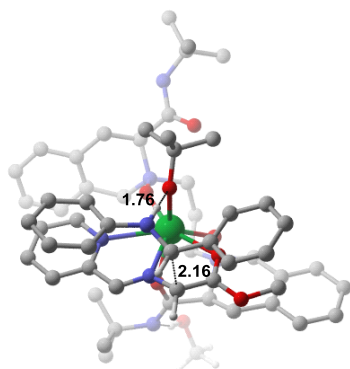

**2R3R-TS-dis**

$E = -3281.192563$   
 $E_{\text{SMD}} = -3282.249692$   
 Frequency = -221.04

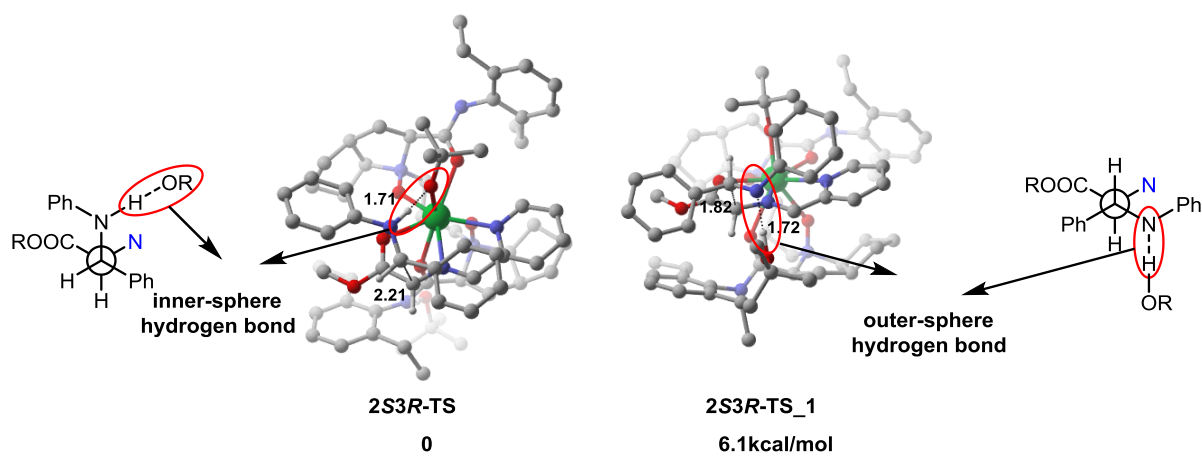

**Figure S5.** Relative free energy calculations for inner and outer-sphere hydrogen bond interaction in the transition state **2S3R-TS** by using **L-RaEt<sub>2</sub>**.

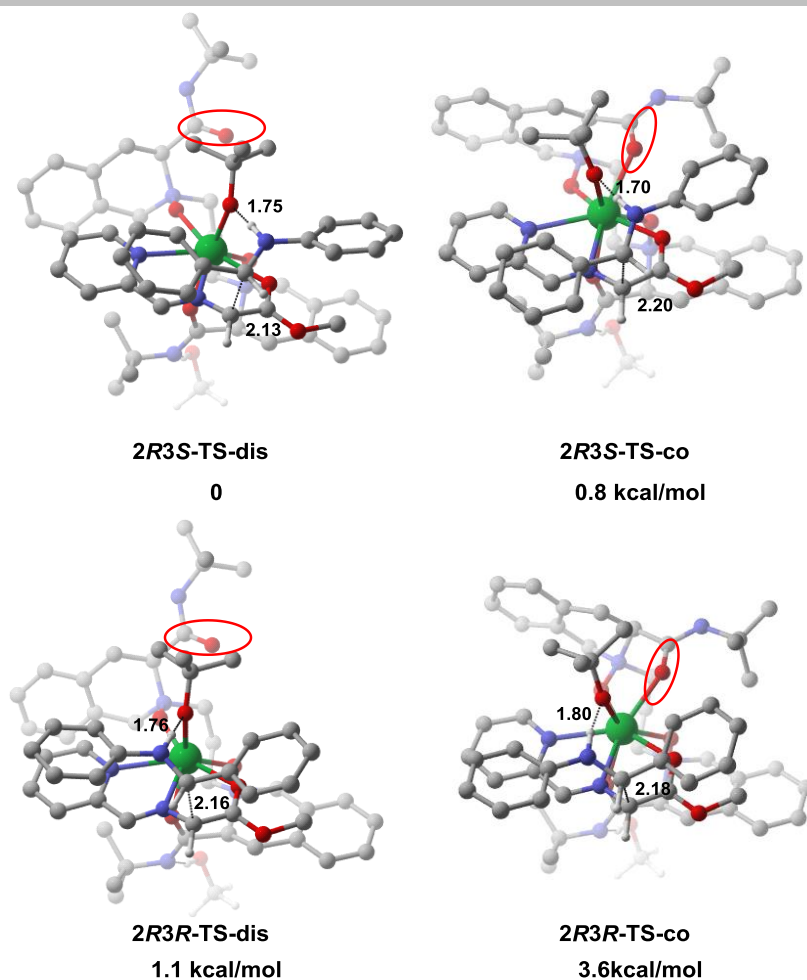

Figure S6. Relative free energy calculations for dissociation and coordination modes of the transition state **2R3S-TS** and **2R3R-TS** by using L-TQ<sup>4</sup>Bu.

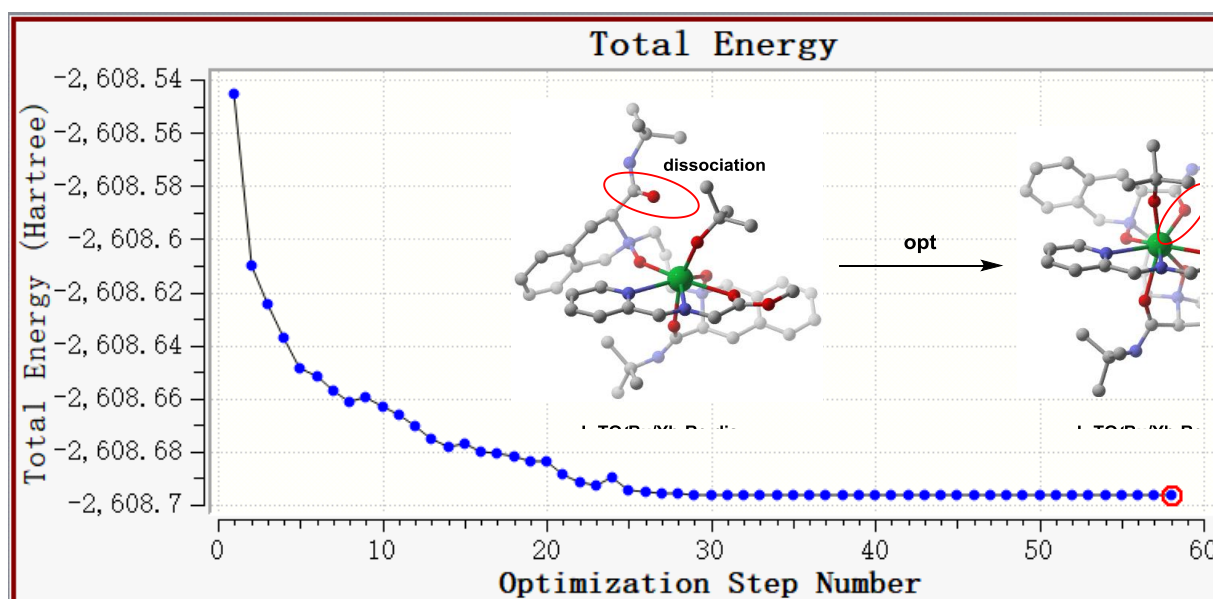

Total Energy(Hartree) curve during optimization

Figure S7. Structure optimization based on **2R3S-TS-dis** when the protonated aldimine is removed, indicating the ligand dissociation can be recovered to bind with Yb<sup>III</sup> center.

---

**Cartesian coordinates of calculated structures****L-RaEt<sub>2</sub>/Yb-Si**

---

|    |             |             |             |
|----|-------------|-------------|-------------|
| Yb | -0.00733800 | -0.16747400 | 0.56089800  |
| O  | 0.14023200  | -1.78747300 | -0.99634600 |
| O  | -2.17065300 | -0.23087000 | -0.60353000 |
| O  | -0.11574800 | 1.38917800  | -1.42860300 |
| O  | 2.23474300  | 0.31786300  | -0.48633700 |
| N  | -0.62024600 | -2.12662900 | -2.07656500 |
| N  | -4.11443400 | -1.31276100 | -1.02853400 |
| H  | -4.52793900 | -2.18587700 | -1.33197900 |
| N  | 0.69408700  | 1.93255300  | -2.38176400 |
| N  | 4.14878300  | 1.32453100  | -1.13857500 |
| C  | -0.57442900 | -1.03899300 | -3.13822700 |
| H  | -1.22191400 | -0.25400700 | -2.75632500 |
| H  | -0.99338100 | -1.45874200 | -4.05785000 |
| C  | 0.82970800  | -0.45439300 | -3.32833700 |
| H  | 1.39388500  | -0.62778200 | -2.41445300 |
| H  | 1.35420900  | -0.95205700 | -4.15043500 |
| C  | 0.77953500  | 1.04702700  | -3.62542300 |
| H  | 1.65787900  | 1.37112500  | -4.19114000 |
| H  | -0.10630400 | 1.29748700  | -4.21518200 |
| C  | -0.16422800 | -3.53384800 | -2.52481600 |
| H  | -0.63493300 | -3.70644700 | -3.49734600 |
| C  | 1.36051200  | -3.72518000 | -2.53494300 |
| H  | 1.83165300  | -2.83321600 | -2.12303900 |
| H  | 1.74670200  | -3.89327600 | -3.54475800 |
| C  | 1.61572000  | -4.91375800 | -1.57741000 |
| H  | 1.54383200  | -5.86385000 | -2.12209100 |
| H  | 2.61280800  | -4.86885500 | -1.12835200 |
| C  | 0.48480900  | -4.80467200 | -0.54092000 |
| H  | 0.69480900  | -3.98647600 | 0.15520500  |
| H  | 0.33619600  | -5.72597500 | 0.03106200  |
| C  | -0.74139700 | -4.44164900 | -1.39998200 |
| H  | -1.14760700 | -5.34706900 | -1.86465200 |
| C  | -1.86725200 | -3.62842900 | -0.71165300 |
| H  | -2.80171800 | -4.18726500 | -0.60871400 |
| H  | -1.56352900 | -3.26160000 | 0.27290700  |
| C  | -2.05570300 | -2.42424200 | -1.64625500 |
| H  | -2.58534000 | -2.71937800 | -2.56105100 |
| C  | -2.76624300 | -1.22135500 | -1.03311300 |
| C  | -4.96931600 | -0.38304600 | -0.33237900 |
| C  | -5.60980600 | -0.82998800 | 0.83627600  |
| C  | -6.42468000 | 0.07553500  | 1.52475800  |
| H  | -6.92016300 | -0.24765900 | 2.43614400  |
| C  | -6.58770400 | 1.38098300  | 1.06624400  |
| H  | -7.21595200 | 2.07524100  | 1.61677500  |
| C  | -5.94583500 | 1.79618900  | -0.09992800 |
| H  | -6.08285000 | 2.81214600  | -0.46157200 |
| C  | -5.12866300 | 0.92292800  | -0.82804600 |
| C  | -5.44927100 | -2.25228800 | 1.32571400  |
| H  | -5.64842300 | -2.28597900 | 2.40187600  |
| H  | -4.40865800 | -2.57023600 | 1.20173900  |
| C  | -6.39055000 | -3.23953200 | 0.61055100  |
| H  | -6.25067200 | -4.25647500 | 0.99218400  |
| H  | -6.22003400 | -3.26452600 | -0.47466000 |
| H  | -7.43789400 | -2.95776200 | 0.76046100  |
| C  | -4.47815100 | 1.38465800  | -2.11468800 |
| H  | -3.41469000 | 1.13079200  | -2.10142800 |
| H  | -4.52790100 | 2.47904600  | -2.15915200 |
| C  | -5.14149600 | 0.79905200  | -3.37356900 |
| H  | -4.64879600 | 1.17009500  | -4.27967500 |
| H  | -6.19942500 | 1.07674100  | -3.42504000 |
| H  | -5.08244100 | -0.29486800 | -3.37937300 |
| C  | 0.15568200  | 3.33488200  | -2.80550800 |
| H  | 0.64864400  | 3.55581900  | -3.75704000 |
| C  | -1.37366900 | 3.39781800  | -2.87793300 |
| H  | -1.76306600 | 2.48915800  | -2.41402600 |
| H  | -1.74588800 | 3.46551100  | -3.90452400 |
| C  | -1.75272900 | 4.61929400  | -2.00776600 |
| H  | -1.71548100 | 5.53984800  | -2.60400600 |
| H  | -2.76376100 | 4.53300000  | -1.59673800 |
| C  | -0.67358900 | 4.63925100  | -0.91432000 |
| H  | -0.60682500 | 5.59590700  | -0.38777500 |
| H  | -0.88620200 | 3.86231000  | -0.17940400 |
| C  | 0.61809000  | 4.28244500  | -1.67056200 |
| H  | 1.04591400  | 5.18312800  | -2.12467000 |
| C  | 1.70316100  | 3.51022700  | -0.88661700 |
| H  | 2.59425100  | 4.10714600  | -0.67321300 |
| H  | 1.31737600  | 3.12479300  | 0.05961900  |
| C  | 2.05653900  | 2.33636600  | -1.81153400 |
| H  | 2.64379600  | 2.69717500  | -2.66411500 |
| C  | 2.80137100  | 1.22033300  | -1.09889700 |
| C  | 5.03156200  | 0.52261300  | -0.32680900 |
| C  | 5.62560600  | 1.12961000  | 0.79114100  |
| C  | 6.52763600  | 0.37158700  | 1.54469000  |

---

|   |             |             |             |
|---|-------------|-------------|-------------|
| H | 6.99711400  | 0.81795200  | 2.41712700  |
| C | 6.81087000  | -0.94587000 | 1.19664600  |
| H | 7.51443900  | -1.52336800 | 1.78945500  |
| C | 6.17916700  | -1.53649800 | 0.10256600  |
| H | 6.39945700  | -2.56998600 | -0.14072100 |
| C | 5.26589900  | -0.81910400 | -0.67751400 |
| C | 5.30178100  | 2.55564300  | 1.18319000  |
| H | 5.50702800  | 2.68036400  | 2.25212000  |
| H | 4.22738200  | 2.73914000  | 1.05676200  |
| C | 6.10982300  | 3.60546900  | 0.39897900  |
| H | 5.85600000  | 4.61981900  | 0.72565600  |
| H | 5.92376500  | 3.54942100  | -0.68189600 |
| H | 7.18461400  | 3.45768600  | 0.54618600  |
| C | 4.50677700  | -1.45078000 | -1.82834500 |
| H | 3.45461700  | -1.50929200 | -1.52277300 |
| H | 4.53054500  | -0.76763300 | -2.68864000 |
| C | 4.97875000  | -2.83820200 | -2.26913300 |
| H | 4.38843700  | -3.18028700 | -3.12561200 |
| H | 4.85410500  | -3.57925800 | -1.47151800 |
| H | 6.03323000  | -2.83496500 | -2.56575200 |
| O | -1.21613300 | -1.26813000 | 1.82964200  |
| C | -0.32043400 | 2.71278000  | 2.29194800  |
| C | -0.85606100 | 3.91808300  | 2.79991700  |
| C | -2.17030700 | 4.25838400  | 2.51968200  |
| C | -2.95060500 | 3.40000500  | 1.73250100  |
| C | -2.35366000 | 2.24425900  | 1.24129300  |
| N | -1.07676500 | 1.90859500  | 1.48507000  |
| H | -2.59135800 | 5.17754400  | 2.91824300  |
| H | -0.23608200 | 4.55251100  | 3.42639900  |
| H | -3.99101300 | 3.60877300  | 1.50958700  |
| H | -2.90495000 | 1.54611200  | 0.62367400  |
| C | 1.00695300  | 2.26867800  | 2.63402500  |
| H | 1.61447400  | 2.87815900  | 3.30659300  |
| N | 1.39915600  | 1.07146900  | 2.24228300  |
| C | 2.52105800  | 0.43908400  | 2.59456700  |
| H | 3.26758100  | 0.87037900  | 3.25775900  |
| C | 2.63050400  | -0.90652300 | 2.14269400  |
| O | 1.76993100  | -1.48580600 | 1.43138800  |
| O | 3.73571700  | -1.55572300 | 2.55148600  |
| C | 3.83645300  | -2.92877300 | 2.15641500  |
| H | 4.78713500  | -3.27819400 | 2.56028500  |
| H | 3.00661300  | -3.51176000 | 2.56699600  |
| H | 3.83293900  | -3.01854000 | 1.06636600  |
| C | -1.57997800 | -1.60881300 | 3.14243600  |
| C | -0.38944700 | -1.38766900 | 4.09403700  |
| H | 0.45776100  | -2.00360400 | 3.77621700  |
| H | -0.07454500 | -0.33929700 | 4.05798500  |
| H | -0.64240500 | -1.64105300 | 5.13082800  |
| C | -2.76122300 | -0.71914000 | 3.57248000  |
| H | -3.58523800 | -0.81894100 | 2.85842300  |
| H | -3.12851600 | -0.97648100 | 4.57391100  |
| H | -2.45198600 | 0.33170300  | 3.57406800  |
| C | -1.98652900 | -3.09331500 | 3.17371400  |
| H | -2.27617600 | -3.41914100 | 4.18012000  |
| H | -2.83330800 | -3.27108600 | 2.50104400  |
| H | -1.14710200 | -3.71257900 | 2.83623600  |
| H | 4.55012100  | 2.13245500  | -1.59821100 |

### L-RaEt<sub>2</sub>/Yb-Re

|    |             |             |             |
|----|-------------|-------------|-------------|
| Yb | -0.11766100 | 0.10730800  | 0.71892900  |
| O  | 0.32255600  | -1.43154500 | -0.97067800 |
| O  | -2.15682600 | -0.27389000 | -0.47667800 |
| O  | -0.21300400 | 1.75830000  | -1.28170600 |
| O  | 2.10666900  | 0.90598200  | -0.01600100 |
| N  | -0.33036400 | -1.71012000 | -2.14274700 |
| N  | -3.95021500 | -1.38119500 | -1.30183700 |
| H  | -4.24793100 | -2.19803200 | -1.82002600 |
| N  | 0.62419600  | 2.44040900  | -2.11228400 |
| N  | 3.96916600  | 1.55274800  | -1.11897600 |
| C  | -0.37146300 | -0.50411900 | -3.05988200 |
| H  | -1.05318000 | 0.19395700  | -2.58141400 |
| H  | -0.77720200 | -0.83504200 | -4.02103600 |
| C  | 0.99428100  | 0.16884300  | -3.19528700 |
| H  | 1.55112100  | -0.02892500 | -2.28044400 |
| H  | 1.56026900  | -0.25247100 | -4.03243500 |
| C  | 0.85538600  | 1.67787100  | -3.40873000 |
| H  | 1.74337800  | 2.10014800  | -3.88812300 |
| H  | -0.00780700 | 1.90499400  | -4.04028100 |
| C  | 0.31400000  | -2.96790300 | -2.76940700 |
| H  | -0.02716700 | -2.98546300 | -3.80818700 |
| C  | 1.84259700  | -3.03332000 | -2.63758400 |
| H  | 2.17122200  | -2.24938100 | -1.95305500 |
| H  | 2.34607900  | -2.88936800 | -3.59776900 |
| C  | 2.11994400  | -4.42006900 | -2.01103700 |
| H  | 2.18303300  | -5.18514700 | -2.79490100 |
| H  | 3.06647000  | -4.43986300 | -1.46085300 |



|   |             |             |             |
|---|-------------|-------------|-------------|
| C | 0.89808800  | -4.68487800 | -1.11295900 |
| H | 0.98219900  | -4.12491000 | -0.17665800 |
| H | 0.77814700  | -5.74237500 | -0.85895900 |
| C | -0.28478400 | -4.13720600 | -1.93272100 |
| H | -0.64086600 | -4.90708900 | -2.62609000 |
| C | -1.47313100 | -3.53926700 | -1.14235300 |
| H | -2.35929000 | -4.17929600 | -1.13782000 |
| H | -1.19524900 | -3.31610000 | -0.11063300 |
| C | -1.74686600 | -2.21982500 | -1.87174300 |
| H | -2.18151500 | -2.41880700 | -2.85969600 |
| C | -2.62093300 | -1.20003800 | -1.14101900 |
| C | -4.97183800 | -0.67474900 | -0.57223300 |
| C | -5.86335700 | -1.45681100 | 0.18963800  |
| C | -6.85357300 | -0.80305300 | 0.92845500  |
| H | -7.54245800 | -1.39416800 | 1.52582200  |
| C | -6.95161300 | 0.58586500  | 0.91718100  |
| H | -7.71697900 | 1.08361800  | 1.50546600  |
| C | -6.07329500 | 1.33410300  | 0.13787800  |
| H | -6.16832200 | 2.41642400  | 0.11077800  |
| C | -5.07352200 | 0.72969600  | -0.63702200 |
| C | -5.80087900 | -2.97062200 | 0.19123900  |
| H | -6.26789900 | -3.34274800 | 1.10909900  |
| H | -4.76027400 | -3.31008800 | 0.22883300  |
| C | -6.51827600 | -3.59702500 | -1.02050600 |
| H | -6.46732600 | -4.69052800 | -0.98384300 |
| H | -6.08301800 | -3.27464100 | -1.97710500 |
| H | -7.57257400 | -3.30283500 | -1.04059000 |
| C | -4.20280400 | 1.60691400  | -1.51487100 |
| H | -3.16173700 | 1.53368800  | -1.18865000 |
| H | -4.50384800 | 2.64800500  | -1.35031600 |
| C | -4.31652400 | 1.30569700  | -3.02030300 |
| H | -3.72877100 | 2.02642000  | -3.59975700 |
| H | -5.35656600 | 1.37271500  | -3.35725300 |
| H | -3.95253500 | 0.30265400  | -3.26556600 |
| C | 0.04969100  | 3.85183300  | -2.42537600 |
| H | 0.62820400  | 4.21516600  | -3.28073200 |
| C | -1.46367000 | 3.85192300  | -2.66443600 |
| H | -1.84254700 | 2.86021200  | -2.41044000 |
| H | -1.72513500 | 4.08085300  | -3.70175300 |
| C | -2.01354900 | 4.88437900  | -1.65197400 |
| H | -1.97832100 | 5.89437200  | -2.07984800 |
| H | -3.05468700 | 4.67933700  | -1.38257700 |
| C | -1.05102000 | 4.76698600  | -0.45998300 |
| H | -1.11656300 | 5.60519100  | 0.24061700  |
| H | -1.25454900 | 3.83896000  | 0.07806300  |
| C | 0.32919900  | 4.65312800  | -1.12965900 |
| H | 0.69590600  | 5.64763400  | -1.40690300 |
| C | 1.42187100  | 3.86560000  | -0.36615300 |
| H | 2.24627400  | 4.49199900  | -0.01504700 |
| H | 1.00505200  | 3.33304900  | 0.49212300  |
| C | 1.92507100  | 2.85249500  | -1.40057800 |
| H | 2.53656600  | 3.35494500  | -2.15890800 |
| C | 2.66290600  | 1.67658500  | -0.79812900 |
| C | 4.83302100  | 0.54475600  | -0.55436000 |
| C | 5.20393600  | 0.63323900  | 0.79779600  |
| C | 6.05799500  | -0.35738700 | 1.29538600  |
| H | 6.35356000  | -0.31893500 | 2.33945600  |
| C | 6.52030300  | -1.38589500 | 0.47994300  |
| H | 7.18324100  | -2.14387000 | 0.88751000  |
| C | 6.13427900  | -1.45121100 | -0.85846900 |
| H | 6.50242200  | -2.26122800 | -1.47830200 |
| C | 5.27827300  | -0.48772000 | -1.40107600 |
| C | 4.73684700  | 1.75642700  | 1.69968600  |
| H | 4.96228900  | 1.48036700  | 2.73532500  |
| H | 3.64725200  | 1.84577900  | 1.65342900  |
| C | 5.39908900  | 3.10978300  | 1.38700600  |
| H | 5.04812200  | 3.87926400  | 2.08325000  |
| H | 5.16714500  | 3.44722100  | 0.37039300  |
| H | 6.48886500  | 3.04384200  | 1.47435900  |
| C | 4.82365700  | -0.52564400 | -2.85044000 |
| H | 3.73202900  | -0.42409700 | -2.87225700 |
| H | 5.20854200  | 0.36291000  | -3.37464300 |
| C | 5.22120700  | -1.77318100 | -3.64364200 |
| H | 4.80596200  | -1.72556900 | -4.65597100 |
| H | 4.84356900  | -2.68430600 | -3.16658800 |
| H | 6.30802400  | -1.86626700 | -3.73771600 |
| O | -1.01337800 | -1.19189800 | 2.00167200  |
| C | 2.33740900  | -0.46635600 | 3.00308400  |
| C | 3.36842800  | -1.09151400 | 3.73647800  |
| C | 3.94651600  | -2.25641200 | 3.25216600  |
| C | 3.50806800  | -2.78064100 | 2.03123700  |
| C | 2.48560900  | -2.10912200 | 1.36665100  |
| N | 1.89970100  | -1.00341100 | 1.83248700  |
| H | 4.73639100  | -2.74852500 | 3.81314700  |
| H | 3.69176900  | -0.65667300 | 4.67784300  |
| H | 3.94496800  | -3.67778800 | 1.60607700  |
| H | 2.10066900  | -2.46163800 | 0.41548500  |
| C | 1.70033400  | 0.74153900  | 3.47581500  |

|   |             |             |             |
|---|-------------|-------------|-------------|
| H | 2.00779900  | 1.15289000  | 4.44050000  |
| N | 0.71377200  | 1.26774600  | 2.79277400  |
| C | -0.05068000 | 2.30475000  | 3.18796200  |
| H | 0.09939100  | 2.82481600  | 4.13116800  |
| C | -1.19729600 | 2.53306700  | 2.39937800  |
| O | -1.45899400 | 1.90268200  | 1.32963500  |
| O | -2.04934000 | 3.47756900  | 2.84744100  |
| C | -3.32315500 | 3.54571800  | 2.19035000  |
| H | -3.90884800 | 4.25944400  | 2.77153200  |
| H | -3.21922500 | 3.89660800  | 1.15956400  |
| H | -3.81132400 | 2.56663100  | 2.17923400  |
| C | -1.62715400 | -2.08224800 | 2.88070300  |
| C | -2.99581100 | -2.49732500 | 2.31405200  |
| H | -3.60758400 | -1.60853000 | 2.12834800  |
| H | -2.85985500 | -3.02210400 | 1.36131800  |
| H | -3.53867700 | -3.16618600 | 2.99327600  |
| C | -0.72367300 | -3.31811200 | 3.05527500  |
| H | -0.56529600 | -3.81012300 | 2.08690000  |
| H | 0.25594500  | -3.00980000 | 3.43500200  |
| H | -1.15565000 | -4.05133100 | 3.74749200  |
| C | -1.81721200 | -1.37584000 | 4.23613500  |
| H | -2.29218300 | -2.02731500 | 4.98014800  |
| H | -0.84352100 | -1.05352100 | 4.62071200  |
| H | -2.43882500 | -0.48377400 | 4.10109200  |
| H | 4.36288900  | 2.19013300  | -1.80004200 |

## 2S3R-TS

|    |             |             |             |
|----|-------------|-------------|-------------|
| Yb | 0.48472000  | 0.16611300  | 0.09757800  |
| O  | -0.00435000 | -0.25448600 | -2.06456400 |
| O  | 2.25835200  | -1.24807900 | -0.87347300 |
| O  | -0.09108800 | -2.15925900 | 0.52297900  |
| O  | -1.81980100 | 0.04842200  | 0.41091200  |
| N  | 0.25180200  | -1.28014900 | -2.93399500 |
| N  | 3.71886000  | -2.27978100 | -2.26820600 |
| H  | 3.94303800  | -2.47566800 | -3.23601200 |
| N  | -1.24781200 | -2.89728000 | 0.69547700  |
| N  | -4.00862600 | -0.71556800 | 0.23575600  |
| H  | -4.71243100 | -2.34860000 | -0.12984700 |
| C  | -0.18382400 | -2.62539600 | -2.39064400 |
| H  | 0.51460900  | -2.84019700 | -1.58621900 |
| H  | -0.05518900 | -3.35230100 | -3.19892900 |
| C  | -1.59306800 | -2.62782300 | -1.80881500 |
| H  | -1.85204200 | -1.61452700 | -1.50767400 |
| H  | -2.33385600 | -2.94778900 | -2.54701100 |
| C  | -1.67448400 | -3.56504900 | -0.60268900 |
| H  | -2.70081400 | -3.91276200 | -0.46154700 |
| H  | -1.01066600 | -4.42623900 | -0.72743100 |
| C  | -0.35420100 | -0.89709500 | -4.30128400 |
| H  | -0.35672200 | -1.81837000 | -4.89093800 |
| C  | -1.73034200 | -0.22233400 | -4.21259800 |
| H  | -1.93392800 | 0.02171500  | -3.16878700 |
| H  | -2.53162900 | -0.86257100 | -4.58763800 |
| C  | -1.56851900 | 1.09107000  | -5.00941600 |
| H  | -1.72770400 | 0.91529900  | -6.08105900 |
| H  | -2.28638500 | 1.85299800  | -4.69051500 |
| C  | -0.10889500 | 1.49529100  | -4.74429200 |
| H  | -0.01933300 | 1.89497200  | -3.72857100 |
| H  | 0.26634200  | 2.24499000  | -5.44826200 |
| C  | 0.65208200  | 0.15880200  | -4.84246800 |
| H  | 0.86414100  | -0.06983700 | -5.89260000 |
| C  | 1.93712400  | 0.02094100  | -3.98824900 |
| H  | 2.85780900  | 0.01131700  | -4.57743700 |
| H  | 2.00028600  | 0.82384600  | -3.25639100 |
| C  | 1.73402200  | -1.31480200 | -3.26006300 |
| H  | 1.86579800  | -2.14490600 | -3.96519600 |
| C  | 2.58105300  | -1.59476900 | -2.01627600 |
| C  | 4.74346100  | -2.53087900 | -1.28782500 |
| C  | 5.99675900  | -1.91971800 | -1.46961500 |
| C  | 6.97267600  | -2.12262700 | -0.48738300 |
| H  | 7.94491200  | -1.65190500 | -0.60551700 |
| C  | 6.70933700  | -2.90906800 | 0.63138500  |
| H  | 7.47346900  | -3.04708400 | 1.39078000  |
| C  | 5.47158000  | -3.53672000 | 0.76468000  |
| H  | 5.28130700  | -4.18119600 | 1.61930300  |
| C  | 4.46726800  | -3.37598900 | -0.19738200 |
| C  | 6.32770100  | -1.12965300 | -2.71775300 |
| H  | 7.13429700  | -0.42376900 | -2.49228300 |
| H  | 5.47165800  | -0.52300400 | -3.02811800 |
| C  | 6.76692600  | -2.04212100 | -3.87946200 |
| H  | 7.00742200  | -1.45288000 | -4.77062400 |
| H  | 5.98360600  | -2.76188600 | -4.15399500 |
| H  | 7.65137300  | -2.62542600 | -3.60381300 |
| C  | 3.16976700  | -4.14525400 | -0.07016800 |
| H  | 2.31430700  | -3.46638100 | -0.12263500 |
| H  | 3.13501000  | -4.59798400 | 0.92680300  |
| C  | 3.00826100  | -5.25783000 | -1.12079200 |

|   |             |             |             |
|---|-------------|-------------|-------------|
| H | 2.06811900  | -5.79846800 | -0.96108600 |
| H | 3.82927400  | -5.97976600 | -1.06164100 |
| H | 2.99297300  | -4.84942100 | -2.13691300 |
| C | -1.06836700 | -3.98745300 | 1.79057000  |
| H | -1.77214100 | -4.77574300 | 1.51346400  |
| C | 0.35806700  | -4.50375300 | 1.96045200  |
| H | 1.02848000  | -3.72513200 | 1.59818300  |
| H | 0.55730000  | -5.42495100 | 1.40336500  |
| C | 0.51701300  | -4.65354000 | 3.48674500  |
| H | 0.04916300  | -5.58322800 | 3.83508600  |
| H | 1.56836900  | -4.68185000 | 3.79354900  |
| C | -0.23892700 | -3.43324800 | 4.04300600  |
| H | -0.49919600 | -3.53462300 | 5.10120300  |
| H | 0.37957900  | -2.53808700 | 3.94050600  |
| C | -1.47676100 | -3.31537800 | 3.13436600  |
| H | -2.30891300 | -3.88505700 | 3.56222700  |
| C | -1.96748700 | -1.90915300 | 2.75017300  |
| H | -2.80377900 | -1.55594300 | 3.35953400  |
| H | -1.16564400 | -1.17109800 | 2.80276200  |
| C | -2.40585200 | -2.09236000 | 1.30375400  |
| H | -3.25848100 | -2.76815200 | 1.26275800  |
| C | -2.74999100 | -0.81359000 | 0.56926300  |
| C | -4.54815400 | 0.50220100  | -0.24310400 |
| C | -4.72119000 | 1.59726400  | 0.63308000  |
| C | -5.37682900 | 2.74073000  | 0.16374000  |
| H | -5.51242000 | 3.58290700  | 0.83855900  |
| C | -5.85314400 | 2.81415800  | -1.14241700 |
| H | -6.36271100 | 3.70836800  | -1.49145300 |
| C | -5.67921000 | 1.72729100  | -2.00050100 |
| H | -6.05992800 | 1.78982800  | -3.01484100 |
| C | -5.03985800 | 0.55995800  | -1.56937200 |
| C | -4.28133100 | 1.52044500  | 2.08055800  |
| H | -4.24010400 | 2.53697700  | 2.49239600  |
| H | -3.26457400 | 1.12073600  | 2.14405500  |
| C | -5.22533800 | 0.66330600  | 2.94266400  |
| H | -4.87388200 | 0.61026900  | 3.98062100  |
| H | -5.28547400 | -0.35458400 | 2.54531300  |
| H | -6.23758700 | 1.08201400  | 2.94784500  |
| C | -4.87893700 | -0.65324200 | -2.46736500 |
| H | -3.83214000 | -0.97184800 | -2.43596900 |
| H | -5.43009800 | -1.49709500 | -2.03456800 |
| C | -5.30507400 | -0.47217100 | -3.92598800 |
| H | -5.11568400 | -1.39093500 | -4.49295700 |
| H | -4.75556500 | 0.34329900  | -4.41206600 |
| H | -6.37450700 | -0.25046500 | -4.01199500 |
| O | 2.22700700  | 1.61757700  | -0.01118500 |
| C | 1.07040300  | 0.22752700  | 3.44347100  |
| C | 1.59418500  | -0.06182800 | 4.71372500  |
| C | 2.57857900  | -1.03808200 | 4.83767700  |
| C | 3.00755700  | -1.71977200 | 3.69591800  |
| C | 2.42024000  | -1.39497400 | 2.47435500  |
| N | 1.48353000  | -0.44911100 | 2.34125100  |
| H | 3.00506700  | -1.26448000 | 5.81055300  |
| H | 1.24501100  | 0.49733500  | 5.57561200  |
| H | 3.77702500  | -2.48275300 | 3.74171300  |
| H | 2.71479700  | -1.89376400 | 1.55862200  |
| C | 0.10474300  | 1.30425100  | 3.24572100  |
| H | -0.27793700 | 1.82818000  | 4.12399400  |
| N | -0.23175100 | 1.63300700  | 2.03508900  |
| C | -1.00405300 | 2.71088400  | 1.70975300  |
| H | -1.68607900 | 3.15712200  | 2.42919400  |
| C | -1.31453700 | 2.78673600  | 0.28873600  |
| O | -0.65584600 | 2.17086600  | -0.56589900 |
| O | -2.24264800 | 3.67845100  | -0.02716800 |
| C | -2.55430200 | 3.80092200  | -1.43523000 |
| H | -3.34579900 | 4.54578100  | -1.48450700 |
| H | -1.66806200 | 4.12425700  | -1.98523100 |
| H | -2.91810300 | 2.84208500  | -1.80985400 |
| N | 1.16514400  | 4.12054300  | 0.44408500  |
| C | 0.47341500  | 4.35124000  | 1.58335200  |
| H | -0.27654600 | 5.13499900  | 1.51172300  |
| C | 0.90174800  | 4.77992800  | -0.77497800 |
| C | 0.41705900  | 6.09527800  | -0.82274600 |
| C | 1.17430900  | 4.10137800  | -1.97531400 |
| C | 0.17758000  | 6.70634100  | -2.05434900 |
| H | 0.24918400  | 6.65396400  | 0.09275500  |
| C | 0.95425700  | 4.73081300  | -3.19671300 |
| H | 1.51808600  | 3.07539500  | -1.91842100 |
| C | 0.44528000  | 6.03269900  | -3.24736100 |
| H | -0.20175900 | 7.72402500  | -2.07645300 |
| H | 1.16915700  | 4.19499700  | -4.11685500 |
| H | 0.26888200  | 6.51805500  | -4.20251100 |
| C | 1.03903200  | 4.16349400  | 2.92036000  |
| C | 2.11511100  | 3.29562100  | 3.17633400  |
| C | 0.44937200  | 4.84750800  | 4.00089600  |
| C | 2.63276700  | 3.17273200  | 4.46706900  |
| H | 2.53172100  | 2.71269100  | 2.36560000  |
| C | 0.95288700  | 4.70563000  | 5.29000700  |

|   |             |             |             |
|---|-------------|-------------|-------------|
| H | -0.39843700 | 5.50458600  | 3.82078400  |
| C | 2.05616000  | 3.87441600  | 5.52539800  |
| H | 3.47399500  | 2.50862000  | 4.64214500  |
| H | 0.49820300  | 5.25297300  | 6.11050900  |
| H | 2.45851500  | 3.77808900  | 6.52987700  |
| H | 1.64431000  | 3.18962300  | 0.34203800  |
| C | 3.64283600  | 1.73829100  | -0.15158300 |
| C | 4.35503500  | 0.75117900  | 0.78860500  |
| H | 4.06483600  | 0.94259600  | 1.82755600  |
| H | 4.07946600  | -0.27535700 | 0.53841800  |
| H | 5.44595500  | 0.83678300  | 0.71552200  |
| C | 4.06500400  | 1.45858700  | -1.60504700 |
| H | 3.79582500  | 0.44548000  | -1.89445700 |
| H | 3.57551500  | 2.16167400  | -2.28696700 |
| H | 5.14850200  | 1.56656200  | -1.73123800 |
| C | 4.13604200  | 3.17233500  | 0.15905000  |
| H | 5.22190400  | 3.23076600  | 0.02224800  |
| H | 3.67799500  | 3.90244500  | -0.51593400 |
| H | 3.92367500  | 3.47898000  | 1.18541500  |
| C | -6.07428500 | -3.69313600 | 0.39836800  |
| C | -5.78451200 | -3.70038700 | 1.90912800  |
| H | -4.95492100 | -4.38348700 | 2.13073600  |
| H | -5.50874600 | -2.69538500 | 2.24929900  |
| H | -6.65828900 | -4.02583300 | 2.48503400  |
| C | -6.41411400 | -5.10114700 | -0.09217800 |
| H | -7.31066500 | -5.48682100 | 0.40490500  |
| H | -6.58921100 | -5.09003000 | -1.17297300 |
| H | -5.58194200 | -5.78460000 | 0.11255400  |
| C | -7.20880100 | -2.70865600 | 0.07630400  |
| H | -6.93249500 | -1.69099900 | 0.37664200  |
| H | -7.41004900 | -2.70450200 | -1.00041600 |
| H | -8.13239800 | -2.98106200 | 0.59962000  |
| O | -4.89007400 | -3.30822200 | -0.31824600 |

## 2S3R-TS\_1

|    |             |             |             |
|----|-------------|-------------|-------------|
| Yb | 0.83337800  | -0.28084400 | -0.48899600 |
| O  | 1.81351900  | -2.28241200 | -0.74779300 |
| O  | 3.20995000  | 0.12096300  | -0.37954800 |
| O  | 1.87825700  | -0.54610300 | 1.83103100  |
| O  | -0.51760500 | -1.73002300 | 1.15831500  |
| N  | 3.07249800  | -2.77562400 | -0.59499200 |
| N  | 5.42554000  | 0.03242100  | -0.75966100 |
| H  | 6.21541400  | -0.52796800 | -1.05211100 |
| N  | 1.67278000  | -1.15907500 | 3.03186900  |
| N  | -1.78556100 | -2.45359800 | 2.88678900  |
| H  | -1.93320800 | -2.39646500 | 3.88736400  |
| C  | 3.45340700  | -2.87023000 | 0.87313400  |
| H  | 3.73226100  | -1.85628600 | 1.15162900  |
| H  | 4.32546400  | -3.52718200 | 0.94401500  |
| C  | 2.29421000  | -3.30668100 | 1.77249000  |
| H  | 1.36088400  | -3.10642800 | 1.24950200  |
| H  | 2.34361500  | -4.37912800 | 1.98641400  |
| C  | 2.32051000  | -2.54502100 | 3.09835000  |
| H  | 1.81102400  | -3.10020100 | 3.89063300  |
| H  | 3.34961600  | -2.37266800 | 3.42512800  |
| C  | 3.14053300  | -4.08592800 | -1.40951800 |
| H  | 4.07262300  | -4.57682300 | -1.11377300 |
| C  | 1.89860700  | -4.97945600 | -1.25778300 |
| H  | 1.16160300  | -4.46378600 | -0.64058600 |
| H  | 2.14082700  | -5.93759200 | -0.78840200 |
| C  | 1.34539900  | -5.13268700 | -2.69644500 |
| H  | 1.81696100  | -5.99037400 | -3.19257900 |
| H  | 0.26460600  | -5.30670800 | -2.70213400 |
| C  | 1.74452900  | -3.82473400 | -3.40047200 |
| H  | 1.08159000  | -3.01234900 | -3.08730000 |
| H  | 1.71225100  | -3.90067500 | -4.49195000 |
| C  | 3.16836200  | -3.55764700 | -2.87324500 |
| H  | 3.89075500  | -4.15518900 | -3.44026000 |
| C  | 3.62028300  | -2.07448100 | -2.80117300 |
| H  | 4.42240300  | -1.82840800 | -3.50158000 |
| H  | 2.78495700  | -1.38952000 | -2.96245600 |
| C  | 4.09649800  | -1.92271500 | -1.35363400 |
| H  | 5.05902300  | -2.42842300 | -1.20523400 |
| C  | 4.18699200  | -0.50625800 | -0.79367800 |
| C  | 5.67240800  | 1.32315400  | -0.16404500 |
| C  | 5.31425600  | 2.48770100  | -0.86429900 |
| C  | 5.53720400  | 3.71677800  | -0.23014000 |
| H  | 5.27371700  | 4.63234000  | -0.75306900 |
| C  | 6.08661500  | 3.77977600  | 1.05036600  |
| H  | 6.25115400  | 4.74379600  | 1.52332500  |
| C  | 6.42528400  | 2.60722600  | 1.72415800  |
| H  | 6.85124900  | 2.65596900  | 2.72295700  |
| C  | 6.22015500  | 1.35638900  | 1.12977000  |
| C  | 4.70710000  | 2.43280900  | -2.24918100 |
| H  | 4.28717500  | 3.41674300  | -2.48590900 |
| H  | 3.86041000  | 1.73799500  | -2.25667500 |

|   |             |             |             |
|---|-------------|-------------|-------------|
| C | 5.71851500  | 2.04452900  | -3.34162700 |
| H | 5.23744600  | 2.04530400  | -4.32505400 |
| H | 6.12716400  | 1.04236400  | -3.16984200 |
| H | 6.55694700  | 2.74856900  | -3.37107800 |
| C | 6.61343000  | 0.08830200  | 1.85766800  |
| H | 5.85510000  | -0.68854500 | 1.69751700  |
| H | 6.62703700  | 0.28648600  | 2.93510000  |
| C | 7.99322800  | -0.44173000 | 1.42728800  |
| H | 8.25483300  | -1.35196000 | 1.97778200  |
| H | 8.77060500  | 0.30605800  | 1.61372100  |
| H | 8.02277800  | -0.67758600 | 0.35609600  |
| C | 2.24860400  | -0.27997000 | 4.18043900  |
| H | 2.34872400  | -0.95243900 | 5.03782800  |
| C | 3.55576400  | 0.42764300  | 3.80412000  |
| H | 3.68937600  | 0.34052800  | 2.72242400  |
| H | 4.42671500  | -0.00262800 | 4.30768500  |
| C | 3.31059500  | 1.90940100  | 4.17189500  |
| H | 3.54085900  | 2.08429300  | 5.23056700  |
| H | 3.93825700  | 2.58315000  | 3.57972000  |
| C | 1.80849700  | 2.11027500  | 3.90910800  |
| H | 1.39894000  | 3.00012200  | 4.39638300  |
| H | 1.63665400  | 2.20402300  | 2.83640000  |
| C | 1.16712100  | 0.80509700  | 4.41466700  |
| H | 0.97602800  | 0.87680800  | 5.49096000  |
| C | -0.10093300 | 0.30776500  | 3.68187600  |
| H | -1.01659700 | 0.41877900  | 4.26859100  |
| H | -0.23999000 | 0.82557900  | 2.73329100  |
| C | 0.19317700  | -1.17386300 | 3.41342000  |
| H | 0.13167900  | -1.73552700 | 4.35299000  |
| C | -0.71251800 | -1.81473100 | 2.37243300  |
| C | -2.91522700 | -2.86754500 | 2.08929400  |
| C | -4.05757200 | -2.05214200 | 2.11223700  |
| C | -5.17090300 | -2.47392900 | 1.37706600  |
| H | -6.05749600 | -1.84823600 | 1.35428000  |
| C | -5.13589400 | -3.66417700 | 0.65720500  |
| H | -6.00578500 | -3.97299500 | 0.08497400  |
| C | -3.97857300 | -4.44418300 | 0.63685100  |
| H | -3.96713700 | -5.35985600 | 0.05574600  |
| C | -2.83288000 | -4.05179700 | 1.33642900  |
| C | -4.09078500 | -0.75295800 | 2.88639600  |
| H | -4.74563700 | -0.03925900 | 2.38098600  |
| H | -3.10063300 | -0.28110500 | 2.86938100  |
| C | -4.55078900 | -0.93016600 | 4.34345900  |
| H | -4.57902100 | 0.03572700  | 4.85955900  |
| H | -3.88741400 | -1.59750300 | 4.91182900  |
| H | -5.55449600 | -1.36622400 | 4.38345600  |
| C | -1.52341900 | -4.81658000 | 1.26660600  |
| H | -0.79532900 | -4.17089500 | 0.75667900  |
| H | -1.13491200 | -4.95215700 | 2.28547400  |
| C | -1.56774300 | -6.17291500 | 0.55870700  |
| H | -0.58094900 | -6.64710500 | 0.59298100  |
| H | -1.84459300 | -6.07096500 | -0.49681100 |
| H | -2.28475000 | -6.85390600 | 1.02972800  |
| O | 1.27101500  | 0.36662700  | -2.40098900 |
| C | -0.35025000 | 2.60947600  | 0.77847400  |
| C | -0.44326500 | 3.91723400  | 1.27166500  |
| C | 0.69721600  | 4.71761700  | 1.28946600  |
| C | 1.90677300  | 4.18748600  | 0.83848100  |
| C | 1.92722300  | 2.86662800  | 0.38868700  |
| N | 0.83612100  | 2.09250600  | 0.35545600  |
| H | 0.63913500  | 5.74218300  | 1.64503400  |
| H | -1.40564700 | 4.29749500  | 1.59281100  |
| H | 2.82268900  | 4.76849700  | 0.83744000  |
| H | 2.84461700  | 2.39548300  | 0.05841000  |
| C | -1.53204700 | 1.76059000  | 0.63857300  |
| H | -2.46105700 | 2.05749800  | 1.11932900  |
| N | -1.40517900 | 0.67497300  | -0.07054400 |
| C | -2.53979300 | -0.03040900 | -0.48191900 |
| H | -3.32599100 | -0.18508500 | 0.25638200  |
| C | -2.11534200 | -1.28098800 | -1.16171800 |
| O | -0.95023000 | -1.49870400 | -1.53590300 |
| O | -3.09648400 | -2.13400600 | -1.40436000 |
| C | -2.77098000 | -3.28077900 | -2.20764900 |
| H | -3.70366800 | -3.83331400 | -2.30433700 |
| H | -2.40464300 | -2.96130100 | -3.18647400 |
| H | -2.00831100 | -3.88610400 | -1.71086400 |
| N | -3.64541300 | 2.24483800  | -1.02388200 |
| C | -3.44863300 | 1.03876500  | -1.64952400 |
| H | -2.76554200 | 1.04757200  | -2.50429100 |
| C | -3.08465800 | 3.41105800  | -1.51424700 |
| C | -2.52053700 | 3.58387100  | -2.80192400 |
| C | -3.12633500 | 4.55749300  | -0.67792100 |
| C | -2.00435500 | 4.81600700  | -3.20132900 |
| H | -2.50556700 | 2.76047700  | -3.50792200 |
| C | -2.61701600 | 5.78320100  | -1.08955200 |
| H | -3.56752100 | 4.44944000  | 0.30832800  |
| C | -2.03896600 | 5.92679600  | -2.35583300 |
| H | -1.57839300 | 4.90824400  | -4.19791400 |

|   |             |             |             |
|---|-------------|-------------|-------------|
| H | -2.67235100 | 6.63598100  | -0.41594000 |
| H | -1.64263300 | 6.88424000  | -2.68088900 |
| C | -4.68470000 | 0.23908700  | -1.98642700 |
| C | -5.71939000 | 0.04565600  | -1.06152800 |
| C | -4.79172200 | -0.34692300 | -3.25285300 |
| C | -6.83086300 | -0.72557100 | -1.39796800 |
| H | -5.64558200 | 0.50020300  | -0.07974300 |
| C | -5.90439800 | -1.12051000 | -3.59075100 |
| H | -3.99596600 | -0.19866900 | -3.98034300 |
| C | -6.92775700 | -1.31629600 | -2.66162100 |
| H | -7.62934500 | -0.86291500 | -0.67219900 |
| H | -5.97365000 | -1.56360600 | -4.58095700 |
| H | -7.79747000 | -1.91335100 | -2.92255300 |
| H | -4.46606000 | 2.23576200  | 0.48917200  |
| C | 0.98549100  | 0.99963100  | -3.62463500 |
| C | -0.34541800 | 0.46356200  | -4.17849200 |
| H | -0.28639400 | -0.62305100 | -4.30566000 |
| H | -1.14601700 | 0.67294900  | -3.46616400 |
| H | -0.60321700 | 0.92181900  | -5.14102400 |
| C | 0.89134600  | 2.51610100  | -3.38591500 |
| H | 1.84456300  | 2.89567900  | -3.00132900 |
| H | 0.64785000  | 3.06207900  | -4.30531900 |
| H | 0.11449300  | 2.73346900  | -2.64777100 |
| C | 2.10625800  | 0.69738900  | -4.63766700 |
| H | 1.95397800  | 1.24200500  | -5.57690800 |
| H | 3.07929500  | 0.98738500  | -4.22747800 |
| H | 2.13773600  | -0.37334400 | -4.87122100 |
| C | -5.90353800 | 2.86320700  | 1.78460800  |
| C | -6.59139800 | 3.40501100  | 0.52279200  |
| H | -5.91381300 | 4.04725200  | -0.04908900 |
| H | -6.90451600 | 2.58422700  | -0.13073900 |
| H | -7.47750200 | 3.99265900  | 0.78826100  |
| C | -6.85909200 | 1.94797000  | 2.56278600  |
| H | -7.18118800 | 1.11208800  | 1.93071200  |
| H | -6.35697700 | 1.53667200  | 3.44653200  |
| H | -7.75048900 | 2.49110500  | 2.89637500  |
| C | -5.43218500 | 4.01606400  | 2.68495200  |
| H | -4.88877500 | 3.61494500  | 3.54824600  |
| H | -4.75771800 | 4.68223400  | 2.13576300  |
| H | -6.27584100 | 4.61314900  | 3.05085700  |
| O | -4.76086200 | 2.06564500  | 1.43730500  |

## 2S3S-TS

|    |             |             |             |
|----|-------------|-------------|-------------|
| Yb | 0.46178100  | 0.12551500  | -0.02965900 |
| O  | -0.25051500 | -0.62173400 | -2.03950100 |
| O  | 2.01043300  | -1.60051100 | -0.88057600 |
| O  | -0.26057600 | -2.02114200 | 0.84432400  |
| O  | -1.80897500 | 0.29122200  | 0.45395800  |
| N  | -0.16274600 | -1.79176500 | -2.74149300 |
| N  | 3.25040200  | -2.99028700 | -2.17483900 |
| H  | 3.36216000  | -3.37208200 | -3.10591000 |
| N  | -1.45547000 | -2.60445900 | 1.22550400  |
| N  | -4.05882800 | -0.29495000 | 0.53248000  |
| H  | -4.93495300 | -1.89116800 | 0.56621300  |
| C  | -0.65122800 | -2.98264600 | -1.94184200 |
| H  | 0.10256300  | -3.12517000 | -1.17186200 |
| H  | -0.65972400 | -3.84254500 | -2.61920700 |
| C  | -1.99253000 | -2.75208900 | -1.25570800 |
| H  | -2.13666600 | -1.68212800 | -1.12131800 |
| H  | -2.82400000 | -3.11967600 | -1.86354700 |
| C  | -2.03563500 | -3.45211300 | 0.10320300  |
| H  | -3.06832300 | -3.68080900 | 0.37801500  |
| H  | -1.44806800 | -4.37552800 | 0.09235800  |
| C  | -0.86141200 | -1.56675900 | -4.09999200 |
| H  | -0.98554600 | -2.56144000 | -4.53805900 |
| C  | -2.16780400 | -0.76549000 | -4.00613100 |
| H  | -2.27092700 | -0.38005400 | -2.99100300 |
| H  | -3.04415400 | -1.37197300 | -4.24468700 |
| C  | -1.96507400 | 0.42665100  | -4.96943400 |
| H  | -2.23610300 | 0.14482000  | -5.99501600 |
| H  | -2.58423800 | 1.28453000  | -4.68982600 |
| C  | -0.45831500 | 0.71693600  | -4.87399000 |
| H  | -0.24124100 | 1.21627200  | -3.92334500 |
| H  | -0.08403700 | 1.33978100  | -5.69301000 |
| C  | 0.16792300  | -0.69220000 | -4.87046500 |
| H  | 0.24116100  | -1.06601000 | -5.89748300 |
| C  | 1.52289100  | -0.85133500 | -4.13549100 |
| H  | 2.35999700  | -1.07261500 | -4.80304400 |
| H  | 1.76014000  | 0.04760700  | -3.56928000 |
| C  | 1.27268900  | -2.02093100 | -3.17175400 |
| H  | 1.27202800  | -2.96601900 | -3.72881800 |
| C  | 2.20119900  | -2.16707500 | -1.96382900 |
| C  | 4.34394600  | -3.17681800 | -1.25669200 |
| C  | 5.61814700  | -2.74385000 | -1.66496300 |
| C  | 6.67980200  | -2.89043200 | -0.76596000 |
| H  | 7.67098800  | -2.55590000 | -1.06020000 |

|   |             |             |             |
|---|-------------|-------------|-------------|
| C | 6.47544600  | -3.44209100 | 0.49638700  |
| H | 7.30677900  | -3.53745400 | 1.18877700  |
| C | 5.20610000  | -3.88402600 | 0.86568500  |
| H | 5.05523600  | -4.33742500 | 1.84199900  |
| C | 4.11469500  | -3.77630500 | -0.00458500 |
| C | 5.86274600  | -2.17675800 | -3.04725500 |
| H | 6.75386900  | -1.54050300 | -3.01867700 |
| H | 5.03428100  | -1.52472000 | -3.34346600 |
| C | 6.06719400  | -3.27678800 | -4.10679100 |
| H | 6.24909600  | -2.84002900 | -5.09440200 |
| H | 5.19386100  | -3.93834800 | -4.18941300 |
| H | 6.92148500  | -3.91075100 | -3.84866100 |
| C | 2.76770300  | -4.33305500 | 0.40456300  |
| H | 1.99636900  | -3.56251500 | 0.32252000  |
| H | 2.81583600  | -4.60252600 | 1.46560000  |
| C | 2.34054300  | -5.57613100 | -0.39594000 |
| H | 1.37320500  | -5.94633200 | -0.03653200 |
| H | 3.07242200  | -6.38385100 | -0.29201800 |
| H | 2.23885100  | -5.35156900 | -1.46304400 |
| C | -1.28165800 | -3.49642100 | 2.48971500  |
| H | -2.04781900 | -4.26828900 | 2.38970400  |
| C | 0.11561400  | -4.08011900 | 2.68385300  |
| H | 0.81645500  | -3.42452500 | 2.16770100  |
| H | 0.22446400  | -5.09154800 | 2.27903800  |
| C | 0.34007700  | -3.99623000 | 4.20695200  |
| H | -0.16734100 | -4.82487300 | 4.71720600  |
| H | 1.40132000  | -4.05180100 | 4.47390800  |
| C | -0.30865100 | -2.65405800 | 4.59386200  |
| H | -0.53539200 | -2.58119600 | 5.66202000  |
| H | 0.36585300  | -1.83110100 | 4.34508600  |
| C | -1.56946800 | -2.57588600 | 3.71256500  |
| H | -2.43058500 | -2.98379700 | 4.25299500  |
| C | -1.95112800 | -1.21425200 | 3.10830200  |
| H | -2.70833900 | -0.67679500 | 3.68550700  |
| H | -1.08239600 | -0.56541100 | 2.98694100  |
| C | -2.49926500 | -1.60159700 | 1.74313300  |
| H | -3.40269400 | -2.19470200 | 1.86918000  |
| C | -2.79184300 | -0.44303000 | 0.81275100  |
| C | -4.53562800 | 0.85378600  | -0.14238900 |
| C | -4.52342300 | 2.11735600  | 0.49031900  |
| C | -5.11314300 | 3.20504700  | -0.16367400 |
| H | -5.10199800 | 4.17829900  | 0.32171900  |
| C | -5.71079300 | 3.05996700  | -1.41240400 |
| H | -6.16926300 | 3.91397500  | -1.90394900 |
| C | -5.72817500 | 1.80620500  | -2.02524100 |
| H | -6.20641200 | 1.69903600  | -2.99344800 |
| C | -5.15515000 | 0.69051600  | -1.40605400 |
| C | -3.96063500 | 2.29486400  | 1.88574500  |
| H | -3.80884600 | 3.36600000  | 2.07115700  |
| H | -2.97451900 | 1.82644700  | 1.95794000  |
| C | -4.88577800 | 1.72248500  | 2.97496400  |
| H | -4.44760100 | 1.84996100  | 3.97266200  |
| H | -5.05924800 | 0.65502300  | 2.80733400  |
| H | -5.85868700 | 2.22577100  | 2.96440800  |
| C | -5.19905500 | -0.69130300 | -2.03287400 |
| H | -4.18777100 | -1.10993900 | -2.02421300 |
| H | -5.77319700 | -1.36301100 | -1.38334800 |
| C | -5.76213100 | -0.76902900 | -3.45396500 |
| H | -5.70892300 | -1.79853700 | -3.82619400 |
| H | -5.20402500 | -0.12986200 | -4.14905300 |
| H | -6.81312600 | -0.46205400 | -3.49171100 |
| O | 2.39403500  | 1.30927100  | -0.24993500 |
| C | 1.11216800  | 0.94040200  | 3.20266100  |
| C | 1.64124000  | 0.92932600  | 4.50094100  |
| C | 2.54398000  | -0.06963900 | 4.85786900  |
| C | 2.88917100  | -1.04102700 | 3.91672100  |
| C | 2.28864400  | -0.98533400 | 2.65816700  |
| N | 1.42340800  | -0.02978300 | 2.30625900  |
| H | 2.97878200  | -0.08315700 | 5.85285300  |
| H | 1.37705600  | 1.71941300  | 5.19585500  |
| H | 3.59771500  | -1.82943700 | 4.14660700  |
| H | 2.50929600  | -1.72468300 | 1.89537800  |
| C | 0.27822200  | 2.04419300  | 2.72996200  |
| H | 0.01321100  | 2.83035400  | 3.44201100  |
| N | -0.05778600 | 2.09424600  | 1.48361700  |
| C | -0.69964000 | 3.15097900  | 0.88886500  |
| H | -1.32008600 | 3.82230700  | 1.47920800  |
| C | -1.10214000 | 2.85687700  | -0.47748100 |
| O | -0.55634900 | 1.97227300  | -1.16217400 |
| O | -2.00993800 | 3.68411400  | -0.97015000 |
| C | -2.41741100 | 3.44681700  | -2.33496000 |
| H | -3.14361800 | 4.22700800  | -2.55362400 |
| H | -1.55294800 | 3.51372100  | -2.99881800 |
| H | -2.89001700 | 2.46493400  | -2.40482400 |
| N | 2.04863500  | 3.82072500  | 1.03240600  |
| C | 1.00593200  | 4.48631100  | 0.47878800  |
| H | 0.61324900  | 5.29343200  | 1.08872700  |
| C | 2.60900400  | 4.10839000  | 2.29261700  |

|   |             |             |             |
|---|-------------|-------------|-------------|
| C | 2.43278500  | 5.34700400  | 2.93257100  |
| C | 3.41919200  | 3.13839900  | 2.90885900  |
| C | 3.03068500  | 5.58803300  | 4.16970100  |
| H | 1.86039900  | 6.13935800  | 2.46191300  |
| C | 4.02532000  | 3.39796700  | 4.13474100  |
| H | 3.54588800  | 2.17464800  | 2.42998700  |
| C | 3.83087800  | 4.62093100  | 4.78103300  |
| H | 2.88202600  | 6.55221100  | 4.64784500  |
| H | 4.64512700  | 2.62996100  | 4.58937500  |
| H | 4.30322800  | 4.82206500  | 5.73758800  |
| C | 0.90930200  | 4.73692300  | -0.97031800 |
| C | 1.46655800  | 3.87829300  | -1.93429200 |
| C | 0.21111100  | 5.88062100  | -1.39646000 |
| C | 1.35211300  | 4.18174300  | -3.28834500 |
| H | 1.93248900  | 2.95543400  | -1.61083600 |
| C | 0.10031200  | 6.18040500  | -2.75239800 |
| H | -0.24207500 | 6.54007100  | -0.66030900 |
| C | 0.67556900  | 5.33280000  | -3.70360500 |
| H | 1.78544400  | 3.50923800  | -4.02414300 |
| H | -0.43075600 | 7.07432800  | -3.06602400 |
| H | 0.59258400  | 5.56712800  | -4.76129700 |
| H | 2.29258300  | 2.90800600  | 0.58777500  |
| C | 3.77545100  | 1.20455400  | -0.59529200 |
| C | 3.91969900  | 0.81308900  | -2.07782900 |
| H | 3.49511300  | -0.17207600 | -2.25655500 |
| H | 3.39655600  | 1.53736200  | -2.71255900 |
| H | 4.97103700  | 0.78681300  | -2.38700500 |
| C | 4.47169000  | 0.15798000  | 0.29303300  |
| H | 4.41717800  | 0.45879600  | 1.34471700  |
| H | 3.98742500  | -0.81350200 | 0.19072400  |
| H | 5.52967800  | 0.04084700  | 0.02920400  |
| C | 4.52303100  | 2.55137200  | -0.43097800 |
| H | 4.57002100  | 2.87935800  | 0.60959500  |
| H | 5.55751700  | 2.44675300  | -0.77767100 |
| H | 4.05512000  | 3.34624400  | -1.01980000 |
| C | -6.33572900 | -2.96236100 | 1.47983800  |
| C | -7.41711100 | -1.95761400 | 1.05427500  |
| H | -7.03410100 | -0.93190800 | 1.11256300  |
| H | -7.72494200 | -2.14950600 | 0.02074200  |
| H | -8.30176000 | -2.02922200 | 1.69719100  |
| C | -6.83179800 | -4.40077800 | 1.32678000  |
| H | -7.11779200 | -4.59138100 | 0.28717600  |
| H | -6.03712300 | -5.10567700 | 1.59724600  |
| H | -7.69791400 | -4.59029800 | 1.96982700  |
| C | -5.89704700 | -2.69180400 | 2.92961100  |
| H | -5.10848200 | -3.39575400 | 3.22393200  |
| H | -5.50729900 | -1.67173500 | 3.02586000  |
| H | -6.73282000 | -2.80321500 | 3.62965500  |
| O | -5.20399500 | -2.84729000 | 0.60210300  |

### L-TQrBu/Yb-Si

|    |             |             |             |
|----|-------------|-------------|-------------|
| Yb | 0.23228900  | 0.12909500  | 0.59933000  |
| O  | 1.51415700  | 0.10821800  | -1.33401800 |
| O  | 0.01415000  | -2.16472700 | -0.34648000 |
| O  | -1.46484400 | -0.08456000 | -1.18390900 |
| O  | -0.66757900 | 2.37641700  | -0.03316300 |
| N  | 1.70855400  | -0.88118100 | -2.26695800 |
| N  | 0.83610500  | -4.19712800 | -0.93302800 |
| H  | 1.57109100  | -4.67962100 | -1.43315800 |
| N  | -1.87272200 | 0.80926000  | -2.13724200 |
| N  | -1.42793600 | 4.20164900  | -1.14739400 |
| H  | -2.12903100 | 4.54679400  | -1.78966900 |
| C  | 0.47520100  | -1.08193000 | -3.14040900 |
| H  | -0.29466800 | -1.44942300 | -2.46988200 |
| H  | 0.73970300  | -1.84530400 | -3.87941800 |
| C  | -0.04529600 | 0.16947100  | -3.85306000 |
| H  | 0.75168100  | 0.66713700  | -4.41601600 |
| H  | -0.74723300 | -0.18744100 | -4.61564400 |
| C  | -0.69930300 | 1.25893700  | -2.99938800 |
| H  | 0.03137200  | 1.65450900  | -2.29949800 |
| H  | -1.06598900 | 2.05899200  | -3.65217800 |
| C  | 2.89539800  | -0.46321200 | -3.11339800 |
| H  | 2.64652400  | 0.53205900  | -3.48040500 |
| H  | 2.95197000  | -1.15199500 | -3.96602300 |
| C  | 4.18467600  | -0.42267600 | -2.33139500 |
| C  | 5.23032200  | 0.37711300  | -2.80604400 |
| H  | 5.08682400  | 0.97538000  | -3.70333400 |
| C  | 6.45123100  | 0.41402100  | -2.13619500 |
| H  | 7.25819800  | 1.03564100  | -2.51244600 |
| C  | 6.62596100  | -0.34378100 | -0.97470900 |
| H  | 7.57184900  | -0.31620600 | -0.44169000 |
| C  | 5.58223600  | -1.13362900 | -0.49779700 |
| H  | 5.70998900  | -1.71584800 | 0.41162000  |
| C  | 4.35634600  | -1.18508400 | -1.17179300 |
| C  | 3.22003800  | -1.99566800 | -0.60760300 |
| H  | 2.79986400  | -1.50639200 | 0.28023000  |



|   |             |             |             |
|---|-------------|-------------|-------------|
| H | 3.56825900  | -2.98189300 | -0.27893100 |
| C | 2.08602600  | -2.22452400 | -1.60814200 |
| H | 2.41576000  | -2.86285600 | -2.43624700 |
| C | 0.87355700  | -2.85538500 | -0.90724700 |
| C | -0.22085400 | -5.05170100 | -0.31165300 |
| C | 0.22181300  | -6.50434000 | -0.53770800 |
| H | 0.31269300  | -6.73521600 | -1.60666700 |
| H | -0.51922900 | -7.18682800 | -0.11224700 |
| H | 1.18227800  | -6.70586200 | -0.04887400 |
| C | -0.32946400 | -4.75997300 | 1.19383700  |
| H | 0.62158500  | -4.96021000 | 1.69599400  |
| H | -1.09255600 | -5.41127400 | 1.63316500  |
| H | -0.60456800 | -3.72125400 | 1.38106500  |
| C | -1.55813300 | -4.78499700 | -1.02537100 |
| H | -1.48132600 | -5.01802500 | -2.09361200 |
| H | -1.85636000 | -3.74021900 | -0.91358800 |
| H | -2.34108800 | -5.41700200 | -0.59358000 |
| C | -2.94368800 | 0.13775400  | -2.96792000 |
| H | -3.17045900 | 0.79407800  | -3.81857400 |
| H | -2.49163600 | -0.77883500 | -3.34588800 |
| C | -4.17235100 | -0.18832900 | -2.15340400 |
| C | -5.01501100 | -1.21513900 | -2.59389300 |
| H | -4.76099400 | -1.77177800 | -3.49345700 |
| C | -6.17408800 | -1.53105500 | -1.88794800 |
| H | -6.82306900 | -2.32768100 | -2.23918000 |
| C | -6.48999300 | -0.82364100 | -0.72495800 |
| H | -7.38758500 | -1.06693400 | -0.16409300 |
| C | -5.64711000 | 0.19286500  | -0.28120400 |
| H | -5.87828900 | 0.72942400  | 0.63545100  |
| C | -4.48709900 | 0.52340800  | -0.98999300 |
| C | -3.54895400 | 1.57719700  | -0.45690000 |
| H | -2.99375100 | 1.17667300  | 0.39519800  |
| H | -4.10395800 | 2.45515600  | -0.10491800 |
| C | -2.53418200 | 2.05049900  | -1.49469100 |
| H | -3.02326000 | 2.58854500  | -2.31438100 |
| C | -1.45573100 | 2.89956900  | -0.82904200 |
| C | -0.47482800 | 5.20834800  | -0.58468500 |
| C | -0.82282300 | 6.54206500  | -1.26053100 |
| H | -1.85006200 | 6.85098800  | -1.03060100 |
| H | -0.70569700 | 6.48177100  | -2.34976500 |
| H | -0.15189600 | 7.32487700  | -0.89615500 |
| C | -0.66983100 | 5.31103600  | 0.93693100  |
| H | -1.70072700 | 5.59556200  | 1.17559900  |
| H | -0.00073100 | 6.07954300  | 1.33785600  |
| H | -0.43623600 | 4.36536500  | 1.43043800  |
| C | 0.96516600  | 4.79175200  | -0.93300300 |
| H | 1.09585300  | 4.72715200  | -2.01975200 |
| H | 1.21841200  | 3.82852800  | -0.48588900 |
| H | 1.66153400  | 5.54578500  | -0.55118200 |
| O | 1.39374700  | -1.08128100 | 1.82485500  |
| C | -2.20489900 | 0.12473200  | 2.93019000  |
| C | -3.35619400 | -0.25366400 | 3.65627900  |
| C | -4.16273500 | -1.27604600 | 3.18257700  |
| C | -3.82846000 | -1.91853300 | 1.98186400  |
| C | -2.68351600 | -1.49747300 | 1.31696200  |
| N | -1.88489800 | -0.51561400 | 1.76477500  |
| H | -5.04867800 | -1.57252200 | 3.73772300  |
| H | -3.59371400 | 0.26303100  | 4.58130100  |
| H | -4.44224400 | -2.71037900 | 1.56733200  |
| H | -2.38164500 | -1.93646400 | 0.37339000  |
| C | -1.34384800 | 1.19172100  | 3.37017200  |
| H | -1.58104000 | 1.71914000  | 4.29657600  |
| N | -0.28453600 | 1.49126100  | 2.65264600  |
| C | 0.61752600  | 2.44229100  | 2.92219600  |
| H | 0.56867200  | 3.08068700  | 3.80174900  |
| C | 1.69515500  | 2.53852300  | 2.00427100  |
| O | 1.82974900  | 1.80749800  | 0.98485900  |
| O | 2.60394900  | 3.49293300  | 2.28333500  |
| C | 3.76892400  | 3.51885700  | 1.44579400  |
| H | 4.40502900  | 4.30238500  | 1.85965500  |
| H | 4.28361900  | 2.55403300  | 1.46876500  |
| H | 3.50216400  | 3.75088600  | 0.41073600  |
| C | 1.91698100  | -1.53251500 | 3.04862800  |
| C | 2.81709000  | -2.75962000 | 2.79938600  |
| H | 2.26690500  | -3.51874400 | 2.23232600  |
| H | 3.70524100  | -2.47646300 | 2.22247100  |
| H | 3.15807800  | -3.20786700 | 3.73992800  |
| C | 2.75521800  | -0.41656500 | 3.69839900  |
| H | 3.54553200  | -0.09943600 | 3.00783000  |
| H | 2.12640200  | 0.45217600  | 3.91245500  |
| H | 3.22153600  | -0.75014100 | 4.63375900  |
| C | 0.75338400  | -1.93026600 | 3.97488000  |
| H | 1.10937000  | -2.30343300 | 4.94292200  |
| H | 0.10850000  | -1.06410600 | 4.15112400  |
| H | 0.14921300  | -2.71153000 | 3.50005900  |

L-TQfBu/Yb-Re

|    |             |             |             |
|----|-------------|-------------|-------------|
| Yb | 0.13671900  | 0.01235800  | 0.61413300  |
| O  | 1.24503300  | -0.23552400 | -1.43415700 |
| O  | -0.27609000 | -2.27793600 | -0.10767700 |
| O  | -1.68599900 | -0.17806800 | -1.04090900 |
| O  | -0.54432600 | 2.28695500  | -0.16690200 |
| N  | 1.28366400  | -1.29680700 | -2.30799200 |
| N  | 0.17042900  | -4.40587500 | -0.74024200 |
| H  | 0.77254200  | -5.00165100 | -1.29290900 |
| N  | -2.10949900 | 0.69682900  | -2.00401600 |
| N  | -1.38590900 | 4.12123100  | -1.21043100 |
| H  | -2.15568600 | 4.47372500  | -1.76414900 |
| C  | -0.03047500 | -1.44729000 | -3.06380200 |
| H  | -0.76763700 | -1.70405100 | -2.30890800 |
| H  | 0.11068200  | -2.27611400 | -3.76529000 |
| C  | -0.51178000 | -0.20599900 | -3.82089000 |
| H  | 0.26627300  | 0.17892100  | -4.48929700 |
| H  | -1.30880100 | -0.55268000 | -4.48903400 |
| C  | -0.99238700 | 0.99234000  | -2.99701200 |
| H  | -0.17022600 | 1.36732200  | -2.39519900 |
| H  | -1.35455900 | 1.77625500  | -3.67171300 |
| C  | 2.43084500  | -1.04034400 | -3.26531000 |
| H  | 2.21475400  | -0.07774600 | -3.72787800 |
| H  | 2.39912800  | -1.81871800 | -4.03783800 |
| C  | 3.75706900  | -0.98848800 | -2.54964100 |
| C  | 4.78913100  | -0.21408500 | -3.09162700 |
| H  | 4.62039300  | 0.34034300  | -4.01223000 |
| C  | 6.02784900  | -0.14370900 | -2.45658300 |
| H  | 6.82463500  | 0.45658200  | -2.88547400 |
| C  | 6.23251800  | -0.84141500 | -1.26265700 |
| H  | 7.19046100  | -0.78460000 | -0.75427100 |
| C  | 5.20154300  | -1.60398500 | -0.71771800 |
| H  | 5.35076400  | -2.13015800 | 0.22179400  |
| C  | 3.95814100  | -1.68959500 | -1.35499000 |
| C  | 2.82858400  | -2.43440700 | -0.69251700 |
| H  | 2.50943800  | -1.89844000 | 0.21280400  |
| H  | 3.15235400  | -3.42923800 | -0.36444100 |
| C  | 1.60395900  | -2.62473200 | -1.58911900 |
| H  | 1.80398800  | -3.34096900 | -2.39405700 |
| C  | 0.40477200  | -3.08464400 | -0.74941000 |
| C  | -0.89528600 | -5.07955800 | 0.06428500  |
| C  | -0.75898800 | -6.58065200 | -0.22578700 |
| H  | -0.90363900 | -6.79753700 | -1.29152000 |
| H  | -1.51804500 | -7.13491500 | 0.33316600  |
| H  | 0.22374800  | -6.95798600 | 0.08233900  |
| C  | -0.67375800 | -4.80095300 | 1.56041000  |
| H  | 0.30453000  | -5.17222600 | 1.88284700  |
| H  | -1.44412300 | -5.31688200 | 2.14342000  |
| H  | -0.72875000 | -3.73187400 | 1.77461900  |
| C  | -2.27329000 | -4.56826100 | -0.39370000 |
| H  | -2.41949700 | -4.75985600 | -1.46329300 |
| H  | -2.37692200 | -3.49732000 | -0.20551300 |
| H  | -3.05939200 | -5.09607100 | 0.15639300  |
| C  | -3.30475000 | 0.08090600  | -2.69794800 |
| H  | -3.52843500 | 0.68865300  | -3.58495300 |
| H  | -2.97174800 | -0.90369800 | -3.02422600 |
| C  | -4.50409700 | -0.04926200 | -1.78867300 |
| C  | -5.50743000 | -0.96085000 | -2.13613600 |
| H  | -5.39109900 | -1.57604100 | -3.02586900 |
| C  | -6.65121800 | -1.08844100 | -1.35076200 |
| H  | -7.42426800 | -1.79813900 | -1.62961700 |
| C  | -6.79364100 | -0.30458400 | -0.20272000 |
| H  | -7.68060000 | -0.39863100 | 0.41681400  |
| C  | -5.79293900 | 0.60027900  | 0.14710100  |
| H  | -5.89701000 | 1.20869600  | 1.04238400  |
| C  | -4.64397000 | 0.73837400  | -0.64019200 |
| C  | -3.53823300 | 1.67212500  | -0.21903400 |
| H  | -2.94253800 | 1.19409300  | 0.56298400  |
| H  | -3.94224300 | 2.60750400  | 0.18550800  |
| C  | -2.60223300 | 2.01800800  | -1.37491400 |
| H  | -3.13484800 | 2.55162100  | -2.17023600 |
| C  | -1.41056800 | 2.82431900  | -0.86854500 |
| C  | -0.38246900 | 5.12800100  | -0.74533500 |
| C  | -0.77350300 | 6.45309400  | -1.41492400 |
| H  | -1.77977300 | 6.77191600  | -1.11563300 |
| H  | -0.73727100 | 6.37466500  | -2.50846000 |
| H  | -0.07451400 | 7.23801600  | -1.11312400 |
| C  | -0.46096000 | 5.25459900  | 0.78481900  |
| H  | -1.46297700 | 5.56951400  | 1.09661400  |
| H  | 0.25676300  | 6.00788600  | 1.12656300  |
| H  | -0.22006500 | 4.30582900  | 1.26819000  |
| C  | 1.02415900  | 4.69883700  | -1.19592900 |
| H  | 1.06278300  | 4.58831100  | -2.28583700 |
| H  | 1.31851900  | 3.75745000  | -0.73146900 |
| H  | 1.74889800  | 5.46581300  | -0.90453600 |
| O  | 1.41278000  | -1.12851900 | 1.79832900  |

|   |             |             |             |
|---|-------------|-------------|-------------|
| C | 2.02180300  | 2.55294900  | 1.84230300  |
| C | 3.06610800  | 3.47993500  | 2.03957600  |
| C | 4.15775000  | 3.48096500  | 1.18328700  |
| C | 4.19870100  | 2.55876200  | 0.13177200  |
| C | 3.12464900  | 1.68490400  | -0.01477100 |
| N | 2.05841600  | 1.67468300  | 0.79851900  |
| H | 4.97106400  | 4.18546800  | 1.33514900  |
| H | 3.00947000  | 4.17376400  | 2.87308000  |
| H | 5.03649600  | 2.50638000  | -0.55503000 |
| H | 3.09781800  | 0.95649700  | -0.81599700 |
| C | 0.89564100  | 2.49893500  | 2.74520400  |
| H | 0.86832100  | 3.19096800  | 3.59057500  |
| N | -0.04791800 | 1.61129000  | 2.55418300  |
| C | -1.13611500 | 1.43212200  | 3.32311200  |
| H | -1.33994000 | 2.01754900  | 4.21655500  |
| C | -1.98444700 | 0.38108700  | 2.91637300  |
| O | -1.77912200 | -0.33243100 | 1.88454800  |
| O | -3.07224500 | 0.16497800  | 3.67797500  |
| C | -3.92072100 | -0.92061900 | 3.27604300  |
| H | -4.72414600 | -0.94633700 | 4.01348800  |
| H | -4.32628300 | -0.75145000 | 2.27351400  |
| H | -3.36976700 | -1.86555400 | 3.27955300  |
| C | 1.97639000  | -1.54297000 | 3.01738300  |
| C | 2.71925900  | -2.87758700 | 2.80699300  |
| H | 2.04403000  | -3.61350800 | 2.35591500  |
| H | 3.57696100  | -2.74052400 | 2.13726100  |
| H | 3.09489100  | -3.28473500 | 3.75304900  |
| C | 2.97228400  | -0.47884200 | 3.51223800  |
| H | 3.72501700  | -0.28786500 | 2.73853700  |
| H | 2.44881400  | 0.46021100  | 3.71271800  |
| H | 3.48405200  | -0.79516000 | 4.42964500  |
| C | 0.85416700  | -1.73990400 | 4.05307700  |
| H | 1.24525400  | -2.08369000 | 5.01858300  |
| H | 0.32116900  | -0.79664800 | 4.20964000  |
| H | 0.13357400  | -2.47929100 | 3.68524600  |

## 2R3S-TS-co

|    |             |             |             |
|----|-------------|-------------|-------------|
| Yb | 0.08656200  | -0.19402800 | 0.13712800  |
| O  | -1.72064500 | -1.46184500 | 1.03984700  |
| O  | -0.40206500 | 0.58816300  | 2.39978500  |
| O  | -1.75462700 | 1.32767800  | 0.09812600  |
| O  | -0.89978400 | -0.38978800 | -1.93172700 |
| N  | -2.59950200 | -1.27863300 | 2.08588400  |
| N  | -1.50720400 | 1.18275300  | 4.28864400  |
| H  | -2.14653900 | 0.86885200  | 5.00663400  |
| N  | -2.85062700 | 1.34660800  | -0.76034200 |
| N  | -2.48155600 | -0.46786800 | -3.66068300 |
| H  | -4.19995500 | -0.03449400 | -3.71795900 |
| C  | -3.51758400 | -0.06815100 | 1.92401800  |
| H  | -2.85025200 | 0.78562500  | 1.85179000  |
| H  | -4.10894400 | -0.02108500 | 2.84389900  |
| C  | -4.42488300 | -0.06854300 | 0.70449800  |
| H  | -5.02385000 | -0.98332200 | 0.63841500  |
| H  | -5.15507200 | 0.73325600  | 0.86567600  |
| C  | -3.72028700 | 0.09852200  | -0.63228300 |
| H  | -3.04340100 | -0.73330100 | -0.79830700 |
| H  | -4.45437100 | 0.14612000  | -1.44059000 |
| C  | -3.42263500 | -2.54179800 | 2.20175700  |
| H  | -3.85304300 | -2.69104600 | 1.21218000  |
| H  | -4.23273400 | -2.34531900 | 2.91519800  |
| C  | -2.59657100 | -3.73569100 | 2.60430900  |
| C  | -3.04417700 | -5.01647700 | 2.26157400  |
| H  | -3.96354800 | -5.13119300 | 1.69229000  |
| C  | -2.31598000 | -6.14334800 | 2.64000400  |
| H  | -2.67233900 | -7.13351400 | 2.37231000  |
| C  | -1.12643600 | -5.99135600 | 3.35865900  |
| H  | -0.55118600 | -6.86362300 | 3.65438000  |
| C  | -0.67509500 | -4.71533000 | 3.69139200  |
| H  | 0.25943400  | -4.59153800 | 4.23256100  |
| C  | -1.40525600 | -3.57993800 | 3.32053800  |
| C  | -0.83839500 | -2.20739100 | 3.58081800  |
| H  | -0.02268800 | -2.02720700 | 2.88243300  |
| H  | -0.41225300 | -2.14288800 | 4.58753200  |
| C  | -1.83778000 | -1.07636700 | 3.40751200  |
| H  | -2.59725800 | -1.10198800 | 4.19604300  |
| C  | -1.17094700 | 0.30955600  | 3.32952500  |
| C  | -1.14159600 | 2.63318900  | 4.30812300  |
| C  | 0.38601400  | 2.79027000  | 4.33492400  |
| H  | 0.82029200  | 2.24111800  | 5.17670200  |
| H  | 0.63490800  | 3.85053200  | 4.44894100  |
| H  | 0.83148700  | 2.42274500  | 3.41072400  |
| C  | -1.74942400 | 3.31726100  | 3.06862600  |
| H  | -1.39217100 | 2.86750300  | 2.13873500  |
| H  | -1.48128600 | 4.37878200  | 3.06553600  |
| H  | -2.84419100 | 3.24771600  | 3.09210800  |
| C  | -1.75434700 | 3.20453800  | 5.59458600  |

|   |             |             |             |
|---|-------------|-------------|-------------|
| H | -1.33299200 | 2.72314700  | 6.48503800  |
| H | -2.84484600 | 3.08208900  | 5.60783100  |
| H | -1.54202300 | 4.27518900  | 5.65978100  |
| C | -3.65251600 | 2.57988200  | -0.44351200 |
| H | -4.61168100 | 2.48050800  | -0.96649100 |
| H | -3.83292300 | 2.56015300  | 0.63185900  |
| C | -2.95373500 | 3.85965100  | -0.83157400 |
| C | -3.35327400 | 5.05151600  | -0.21650100 |
| H | -4.10829700 | 5.02451600  | 0.56666900  |
| C | -2.80140200 | 6.27112300  | -0.60448100 |
| H | -3.12123600 | 7.19054700  | -0.12297000 |
| C | -1.84132900 | 6.30187900  | -1.61904400 |
| H | -1.41323000 | 7.24779500  | -1.93836900 |
| C | -1.43493800 | 5.11313200  | -2.22368100 |
| H | -0.68725800 | 5.13313400  | -3.01335500 |
| C | -1.97573500 | 3.88191400  | -1.83345100 |
| C | -1.47032100 | 2.59008500  | -2.42633300 |
| H | -0.52938200 | 2.33073800  | -1.94630900 |
| H | -1.28142200 | 2.69522600  | -3.50064000 |
| C | -2.43413800 | 1.43192500  | -2.24211900 |
| H | -3.36503100 | 1.60874000  | -2.78153500 |
| C | -1.86892600 | 0.07145400  | -2.65405100 |
| C | -2.11118800 | -1.79786600 | -4.17885800 |
| C | -3.10770800 | -2.10426300 | -5.31094300 |
| H | -3.04482400 | -1.33884600 | -6.09255300 |
| H | -4.13439000 | -2.11097700 | -4.92636500 |
| H | -2.90196600 | -3.08089800 | -5.76428600 |
| C | -0.68032700 | -1.77692600 | -4.74716000 |
| H | -0.60225300 | -1.03380700 | -5.54892600 |
| H | -0.41082400 | -2.75696800 | -5.15974000 |
| H | 0.03254500  | -1.51583900 | -3.96382200 |
| C | -2.24847900 | -2.87437300 | -3.08170400 |
| H | -3.27027700 | -2.87189700 | -2.68180000 |
| H | -1.55451900 | -2.68775500 | -2.26171800 |
| H | -2.04913500 | -3.87138200 | -3.49290900 |
| O | 2.05831100  | -0.54431100 | 1.27987700  |
| C | 1.30885800  | -2.76980200 | -1.74271700 |
| C | 1.53891700  | -4.04175000 | -2.28380300 |
| C | 0.96130700  | -5.15653000 | -1.68167300 |
| C | 0.16018900  | -4.97072900 | -0.55593500 |
| C | -0.02939000 | -3.67200700 | -0.08351000 |
| N | 0.52734600  | -2.59248800 | -0.64671700 |
| H | 1.13069600  | -6.14961800 | -2.08758200 |
| H | 2.16863900  | -4.14006400 | -3.16221100 |
| H | -0.31978700 | -5.80044700 | -0.04813100 |
| H | -0.66825400 | -3.47287400 | 0.76601900  |
| C | 1.91352200  | -1.59017800 | -2.35268800 |
| H | 2.48204700  | -1.72747300 | -3.27505400 |
| N | 1.73529000  | -0.42818300 | -1.81677600 |
| C | 2.29978100  | 0.72383200  | -2.29837500 |
| H | 2.64737000  | 0.80614800  | -3.32576000 |
| C | 1.82675500  | 1.89989000  | -1.60574500 |
| O | 1.17063600  | 1.82938400  | -0.54365000 |
| O | 2.23325500  | 3.06110600  | -2.11113700 |
| C | 1.93596000  | 4.25189400  | -1.34245900 |
| H | 2.23414800  | 5.08107800  | -1.98358900 |
| H | 0.87081900  | 4.30327100  | -1.11339100 |
| H | 2.51644800  | 4.24983800  | -0.41837900 |
| C | 2.71514000  | -1.17004200 | 2.38054100  |
| C | 2.21759800  | -0.59491100 | 3.72546900  |
| H | 1.14369600  | -0.68658700 | 3.84441300  |
| H | 2.70152000  | -1.09594600 | 4.57269900  |
| H | 2.45846500  | 0.47113100  | 3.78021900  |
| C | 2.50251800  | -2.69647200 | 2.29950700  |
| H | 1.44502900  | -2.95530100 | 2.21317300  |
| H | 2.99189400  | -3.09576300 | 1.40432600  |
| H | 2.91668400  | -3.21549900 | 3.17285100  |
| C | 4.24747000  | -0.92102500 | 2.39288300  |
| H | 4.69501400  | -1.43802500 | 3.24940200  |
| H | 4.74683500  | -1.29247400 | 1.49591500  |
| H | 4.47802500  | 0.14352600  | 2.49583400  |
| C | -5.65723200 | 0.89685300  | -4.66501300 |
| H | -5.74343100 | 0.19453900  | -5.50807200 |
| H | -5.05355000 | 1.75651300  | -4.99917100 |
| H | -6.66128600 | 1.26103600  | -4.42301800 |
| O | -5.12448800 | 0.27775900  | -3.50748700 |
| N | 3.96783900  | 0.97151500  | 0.01046600  |
| C | 4.25757800  | 0.73403100  | -1.28948000 |
| H | 4.64737400  | 1.59009900  | -1.83495000 |
| C | 4.10656500  | 2.23629800  | 0.61540100  |
| C | 5.10916600  | 3.13859100  | 0.22796700  |
| C | 3.23831100  | 2.57797300  | 1.66608200  |
| C | 5.21299100  | 4.37905900  | 0.85871700  |
| H | 5.82416900  | 2.86729600  | -0.54253100 |
| C | 3.36707700  | 3.80939500  | 2.30183800  |
| H | 2.45954200  | 1.87435100  | 1.93708600  |
| C | 4.34675100  | 4.72268400  | 1.89825500  |
| H | 5.99164100  | 5.06952100  | 0.54709900  |

|   |            |             |             |
|---|------------|-------------|-------------|
| H | 2.68785200 | 4.06420300  | 3.10958600  |
| H | 4.43958600 | 5.68443300  | 2.39367000  |
| C | 4.69809100 | -0.56905400 | -1.78904000 |
| C | 4.41127000 | -1.77347800 | -1.12185500 |
| C | 5.38737400 | -0.62133200 | -3.01611500 |
| C | 4.85945000 | -2.99132000 | -1.63768200 |
| H | 3.82410400 | -1.74992700 | -0.21393300 |
| C | 5.81546600 | -1.83768300 | -3.53714000 |
| H | 5.59684900 | 0.30094300  | -3.55328100 |
| C | 5.55981600 | -3.02810800 | -2.84281300 |
| H | 4.63760700 | -3.91030100 | -1.10310300 |
| H | 6.35979300 | -1.86141800 | -4.47659000 |
| H | 5.90668400 | -3.97564400 | -3.24518100 |
| H | 3.29215300 | 0.32020000  | 0.48897000  |

## 2R3S-TS-dis

|    |             |             |             |
|----|-------------|-------------|-------------|
| Yb | -0.28572600 | -0.06172100 | 0.14309900  |
| O  | 2.04746600  | -0.13110800 | -0.36596700 |
| O  | 2.44666000  | -1.97892500 | -2.87519400 |
| O  | -0.38464300 | 1.20235900  | -1.73794400 |
| O  | -0.36916500 | 2.04473900  | 0.94377400  |
| N  | 3.07525100  | 0.28130100  | -1.19202200 |
| N  | 4.60795200  | -2.70779000 | -2.92239100 |
| H  | 5.54084400  | -2.54614000 | -2.56778600 |
| N  | -0.18645800 | 2.56625600  | -1.91460000 |
| N  | 0.06373100  | 4.33589300  | 1.05015900  |
| H  | 0.69101600  | 5.51345400  | -0.11803900 |
| C  | 2.54300400  | 0.79641200  | -2.54783700 |
| H  | 1.65396700  | 0.20109500  | -2.71610600 |
| H  | 3.29594100  | 0.53088600  | -3.29363000 |
| C  | 2.26397900  | 2.28975500  | -2.67557800 |
| H  | 3.19057700  | 2.86629800  | -2.57697700 |
| H  | 1.95959200  | 2.43950900  | -3.71767800 |
| C  | 1.26886900  | 2.93400600  | -1.72476000 |
| H  | 1.47548300  | 2.65038600  | -0.69832500 |
| H  | 1.33149200  | 4.02399500  | -1.78940500 |
| C  | 3.87875800  | 1.35245900  | -0.46984200 |
| H  | 3.15621000  | 2.08365900  | -0.12086800 |
| H  | 4.52861100  | 1.82617300  | -1.21378400 |
| C  | 4.70055400  | 0.85274800  | 0.69455500  |
| C  | 5.15824700  | 1.79241800  | 1.62653200  |
| H  | 4.86810000  | 2.83468400  | 1.52750200  |
| C  | 5.98138800  | 1.39961900  | 2.67971000  |
| H  | 6.33476500  | 2.13735000  | 3.39364600  |
| C  | 6.34802000  | 0.05677100  | 2.81212600  |
| H  | 6.99593400  | -0.25616400 | 3.62573800  |
| C  | 5.87671400  | -0.88263100 | 1.89595300  |
| H  | 6.14983200  | -1.93004000 | 2.00064100  |
| C  | 5.05379800  | -0.49298100 | 0.83243400  |
| C  | 4.50339000  | -1.50361600 | -0.13967500 |
| H  | 3.63780800  | -2.02151800 | 0.28367000  |
| H  | 5.25142900  | -2.27453700 | -0.35043100 |
| C  | 4.08892200  | -0.85773900 | -1.46142200 |
| H  | 4.95412700  | -0.33916500 | -1.89203600 |
| C  | 3.60619800  | -1.90198800 | -2.49229000 |
| C  | 4.44865800  | -3.86008400 | -3.85561200 |
| C  | 3.49375800  | -4.89322600 | -3.23522300 |
| H  | 3.87742200  | -5.24424300 | -2.27069900 |
| H  | 3.39647900  | -5.75663900 | -3.90179100 |
| H  | 2.50495100  | -4.45805300 | -3.08126800 |
| C  | 3.91537500  | -3.36266200 | -5.20978800 |
| H  | 2.92773300  | -2.91211900 | -5.09337100 |
| H  | 3.83701700  | -4.20388300 | -5.90656600 |
| H  | 4.59536400  | -2.62091000 | -5.64357200 |
| C  | 5.84888900  | -4.46628600 | -4.02680300 |
| H  | 6.25025300  | -4.81796400 | -3.06814900 |
| H  | 6.54845900  | -3.73964900 | -4.45806300 |
| H  | 5.80132000  | -5.32479200 | -4.70263800 |
| C  | -0.64185600 | 2.91698800  | -3.30809800 |
| H  | -0.21319800 | 3.89883800  | -3.54228200 |
| H  | -0.19204400 | 2.16692100  | -3.95911300 |
| C  | -2.14125500 | 2.93565400  | -3.47626900 |
| C  | -2.66281700 | 2.83857100  | -4.77181900 |
| H  | -1.98950000 | 2.68095400  | -5.61166300 |
| C  | -4.03345100 | 2.94915600  | -4.99523500 |
| H  | -4.42690200 | 2.87418400  | -6.00459200 |
| C  | -4.89426400 | 3.16092400  | -3.91485100 |
| H  | -5.96349400 | 3.26028300  | -4.07874600 |
| C  | -4.37562600 | 3.24598500  | -2.62436200 |
| H  | -5.04177300 | 3.40877900  | -1.78028900 |
| C  | -3.00044900 | 3.12705600  | -2.38874900 |
| C  | -2.45565100 | 3.14082100  | -0.98358600 |
| H  | -2.62622200 | 2.16826200  | -0.52622300 |
| H  | -2.97074200 | 3.88929500  | -0.37009600 |
| C  | -0.97232700 | 3.45269200  | -0.91127400 |
| H  | -0.76887500 | 4.47067400  | -1.24579200 |

|   |             |             |             |
|---|-------------|-------------|-------------|
| C | -0.38463600 | 3.25884900  | 0.49157900  |
| C | 0.70145400  | 4.29107800  | 2.38209100  |
| C | 1.09652000  | 5.74153500  | 2.70966800  |
| H | 0.20814600  | 6.38217500  | 2.73505200  |
| H | 1.77514700  | 6.13613100  | 1.94422100  |
| H | 1.59663600  | 5.80453500  | 3.68304100  |
| C | -0.26839200 | 3.76592800  | 3.45775300  |
| H | -1.17019000 | 4.38792900  | 3.48668900  |
| H | 0.20297300  | 3.80151400  | 4.44744100  |
| H | -0.56297700 | 2.73696100  | 3.24436400  |
| C | 1.97579400  | 3.42047600  | 2.32880700  |
| H | 2.65320200  | 3.81017700  | 1.55757800  |
| H | 1.73351700  | 2.38076200  | 2.09692200  |
| H | 2.50663500  | 3.44686700  | 3.28776100  |
| O | -0.69503800 | -2.17985500 | -0.10669700 |
| C | 0.08101000  | -0.03316700 | 3.57687000  |
| C | 0.64700200  | 0.06718200  | 4.85281400  |
| C | 2.02262900  | -0.09311000 | 5.00214500  |
| C | 2.79165700  | -0.36080200 | 3.87193600  |
| C | 2.14896200  | -0.44036100 | 2.63477100  |
| N | 0.83239700  | -0.27496400 | 2.47262100  |
| H | 2.48183900  | -0.01407600 | 5.98323100  |
| H | 0.00723500  | 0.26316600  | 5.70722800  |
| H | 3.86561700  | -0.49315100 | 3.92560300  |
| H | 2.69386300  | -0.61949800 | 1.72186200  |
| C | -1.35741200 | 0.07116900  | 3.39263100  |
| H | -1.98250300 | 0.19313100  | 4.28041900  |
| N | -1.85865900 | -0.02567100 | 2.20785600  |
| C | -3.21794800 | -0.09322900 | 1.99357900  |
| H | -3.91289900 | 0.24984900  | 2.75908700  |
| C | -3.55962300 | 0.12032000  | 0.60009700  |
| O | -2.70890400 | 0.02644300  | -0.30280700 |
| O | -4.85468300 | 0.31657900  | 0.38178400  |
| C | -5.34421600 | 0.35457600  | -0.98017800 |
| H | -6.12070800 | 1.12004800  | -0.99557900 |
| H | -4.54281100 | 0.60243900  | -1.67456400 |
| H | -5.76476800 | -0.62370900 | -1.21693700 |
| C | -0.13553000 | -3.39186200 | -0.62091600 |
| C | 1.31874800  | -3.48425200 | -0.13643400 |
| H | 1.85093500  | -2.59625400 | -0.47485400 |
| H | 1.34368500  | -3.50978100 | 0.96053500  |
| H | 1.82873600  | -4.37579600 | -0.52011400 |
| C | -0.91172200 | -4.62806600 | -0.12559500 |
| H | -0.92318100 | -4.69101900 | 0.96706000  |
| H | -1.94669600 | -4.62215300 | -0.48127700 |
| H | -0.43869500 | -5.54060200 | -0.50634400 |
| C | -0.20252100 | -3.35886700 | -2.15691500 |
| H | 0.31931900  | -4.21625800 | -2.59771900 |
| H | -1.24278500 | -3.39870800 | -2.49176300 |
| H | 0.25959900  | -2.44735200 | -2.53597800 |
| C | 0.49373400  | 7.27126000  | -0.99006000 |
| H | 0.89409200  | 7.76912600  | -1.87923500 |
| H | 0.75508700  | 7.88031400  | -0.11155000 |
| H | -0.60494800 | 7.25096000  | -1.07540800 |
| O | 1.05715500  | 5.97210300  | -0.92432900 |
| N | -3.29554800 | -2.66724600 | 0.78218100  |
| C | -3.63376500 | -2.18049400 | 2.00689700  |
| C | -4.21828800 | -2.83867100 | -0.27166500 |
| C | -5.53161500 | -3.27473400 | -0.03957800 |
| C | -3.79098200 | -2.60680200 | -1.58885900 |
| C | -6.40565600 | -3.45423000 | -1.11280600 |
| H | -5.86308100 | -3.50309000 | 0.96897900  |
| C | -4.66313700 | -2.81638300 | -2.65389000 |
| H | -2.79032600 | -2.22646800 | -1.74962400 |
| C | -5.97756600 | -3.23430400 | -2.42463000 |
| H | -7.42022800 | -3.79161100 | -0.92028400 |
| H | -4.31731600 | -2.63250900 | -3.66735300 |
| H | -6.65832200 | -3.39076500 | -3.25594300 |
| C | -2.87716900 | -2.54705700 | 3.21551500  |
| C | -1.53032600 | -2.94741800 | 3.16720000  |
| C | -3.50787100 | -2.43277900 | 4.46597000  |
| C | -0.84907800 | -3.26554400 | 4.34094900  |
| H | -1.01300300 | -2.97386700 | 2.21503900  |
| C | -2.82136700 | -2.74327300 | 5.63868100  |
| H | -4.54487200 | -2.10802200 | 4.51672000  |
| C | -1.48977300 | -3.16697400 | 5.57816800  |
| H | 0.19094600  | -3.57469500 | 4.28747900  |
| H | -3.32672700 | -2.66527900 | 6.59695000  |
| H | -0.95664400 | -3.41670400 | 6.49111200  |
| H | -2.30097000 | -2.56196500 | 0.48668700  |
| H | -4.70366100 | -2.06018400 | 2.15876800  |

## 2R3R-TS-co

|    |             |             |             |
|----|-------------|-------------|-------------|
| Yb | -0.08156200 | -0.10808000 | -0.14781100 |
| O  | 0.63772300  | -2.21123900 | -0.99965500 |
| O  | 0.72775200  | 0.19895400  | -2.36933700 |

|   |             |             |             |
|---|-------------|-------------|-------------|
| O | 2.30733700  | 0.06539900  | -0.11471000 |
| O | 0.62652200  | -0.68833600 | 1.99019400  |
| N | 1.49619100  | -2.58561700 | -2.01344200 |
| N | 2.06831500  | 0.12025700  | -4.18570300 |
| H | 2.49912400  | -0.47703200 | -4.87941700 |
| N | 3.20827200  | -0.49665200 | 0.78324900  |
| N | 1.87580400  | -1.46549700 | 3.81935500  |
| H | 3.51687700  | -2.13496800 | 3.89863900  |
| C | 2.94793200  | -2.16080400 | -1.79859200 |
| H | 2.92281800  | -1.07498300 | -1.76746300 |
| H | 3.48838300  | -2.51095300 | -2.68353700 |
| C | 3.62803900  | -2.66288400 | -0.53324100 |
| H | 3.52013300  | -3.74595500 | -0.41165300 |
| H | 4.70254900  | -2.50332600 | -0.68248000 |
| C | 3.16513500  | -2.02065800 | 0.76539400  |
| H | 2.12610400  | -2.27131600 | 0.95381100  |
| H | 3.78503200  | -2.36421600 | 1.59790700  |
| C | 1.41427500  | -4.09193700 | -2.12572900 |
| H | 1.63431500  | -4.46251700 | -1.12524300 |
| H | 2.21096900  | -4.41609200 | -2.80693900 |
| C | 0.06150800  | -4.56686100 | -2.58402800 |
| C | -0.36142000 | -5.85407500 | -2.23391800 |
| H | 0.27070500  | -6.47582300 | -1.60418700 |
| C | -1.58599900 | -6.34128500 | -2.68773400 |
| H | -1.90644200 | -7.34196600 | -2.41385300 |
| C | -2.39725500 | -5.53550800 | -3.49133700 |
| H | -3.35385000 | -5.90602100 | -3.84750200 |
| C | -1.98114000 | -4.24926800 | -3.82991000 |
| H | -2.62009400 | -3.61215000 | -4.43549900 |
| C | -0.75070000 | -3.75491300 | -3.38152300 |
| C | -0.37633200 | -2.31971200 | -3.65000800 |
| H | -0.98284500 | -1.68376100 | -3.01053200 |
| H | -0.60298700 | -2.03353300 | -4.68309500 |
| C | 1.07528200  | -1.97375900 | -3.36314600 |
| H | 1.74352000  | -2.41696400 | -4.10861400 |
| C | 1.28154800  | -0.45090400 | -3.26753700 |
| C | 2.49454500  | 1.55780800  | -4.17796300 |
| C | 1.26360600  | 2.48020700  | -4.19139200 |
| H | 0.60351100  | 2.23474500  | -5.03032200 |
| H | 1.59901600  | 3.51609100  | -4.30856600 |
| H | 0.69837600  | 2.40031400  | -3.26264000 |
| C | 3.36075000  | 1.80820300  | -2.92960600 |
| H | 2.82154000  | 1.57587900  | -2.00803000 |
| H | 3.66738200  | 2.85888900  | -2.89688500 |
| H | 4.27058200  | 1.19618700  | -2.96369100 |
| C | 3.31593100  | 1.75692100  | -5.45937900 |
| H | 2.70785700  | 1.58093300  | -6.35451300 |
| H | 4.18721800  | 1.08985100  | -5.48598300 |
| H | 3.68785100  | 2.78433200  | -5.50207300 |
| C | 4.58172800  | 0.00304300  | 0.42432600  |
| H | 5.29885700  | -0.57959200 | 1.01555600  |
| H | 4.73058600  | -0.22391200 | -0.63173100 |
| C | 4.74641300  | 1.48371400  | 0.66458500  |
| C | 5.74708700  | 2.16924200  | -0.03325100 |
| H | 6.34738100  | 1.63956300  | -0.77023400 |
| C | 5.98833500  | 3.51974400  | 0.21337100  |
| H | 6.77042600  | 4.04059000  | -0.33122300 |
| C | 5.22337700  | 4.19368300  | 1.16871900  |
| H | 5.41007500  | 5.24320500  | 1.37776200  |
| C | 4.21897700  | 3.51345700  | 1.85621700  |
| H | 3.61730000  | 4.03530700  | 2.59698500  |
| C | 3.96285700  | 2.15952900  | 1.60827000  |
| C | 2.81920600  | 1.45176400  | 2.29190600  |
| H | 1.88702700  | 1.74598100  | 1.81324900  |
| H | 2.75542600  | 1.73507500  | 3.34859300  |
| C | 2.93186800  | -0.06164800 | 2.23401000  |
| H | 3.79605700  | -0.41100000 | 2.79903100  |
| C | 1.68427800  | -0.79430400 | 2.72677200  |
| C | 0.80525800  | -2.25642800 | 4.45264900  |
| C | 1.44812800  | -2.94567800 | 5.66953400  |
| H | 1.85983000  | -2.19984400 | 6.35858100  |
| H | 2.26749800  | -3.60050500 | 5.35004300  |
| H | 0.71383100  | -3.55214200 | 6.21235300  |
| C | -0.33344000 | -1.33586900 | 4.92990200  |
| H | 0.04888100  | -0.60354300 | 5.65006000  |
| H | -1.12575700 | -1.91670100 | 5.41788500  |
| H | -0.76202300 | -0.79532400 | 4.08474200  |
| C | 0.27345600  | -3.33536100 | 3.48750800  |
| H | 1.09679200  | -3.98225000 | 3.15986200  |
| H | -0.17934400 | -2.87912400 | 2.60753100  |
| H | -0.47448900 | -3.96454800 | 3.98479100  |
| O | -2.09262300 | 0.47834600  | -1.18609400 |
| C | -2.46251800 | -1.20984700 | 1.94878200  |
| C | -3.36421400 | -2.02376300 | 2.64419900  |
| C | -3.55290800 | -3.34140900 | 2.23120800  |
| C | -2.83447800 | -3.81136700 | 1.13343100  |
| C | -1.94628300 | -2.94234500 | 0.49656500  |
| N | -1.76086400 | -1.67647500 | 0.88564500  |

|   |             |             |             |
|---|-------------|-------------|-------------|
| H | -4.24921000 | -3.98682800 | 2.75833100  |
| H | -3.91438900 | -1.61580800 | 3.48545500  |
| H | -2.94571400 | -4.82808200 | 0.77174000  |
| H | -1.34440900 | -3.26318700 | -0.34732800 |
| C | -2.27558000 | 0.18926100  | 2.34093300  |
| H | -2.85812200 | 0.55505400  | 3.19066700  |
| N | -1.45174600 | 0.93936400  | 1.69654800  |
| C | -1.26473900 | 2.28238800  | 1.94083500  |
| H | -1.45712900 | 2.70095000  | 2.92723900  |
| C | -0.17848900 | 2.82333000  | 1.15371700  |
| O | 0.30988400  | 2.22004200  | 0.17208100  |
| O | 0.21021200  | 4.04729300  | 1.49070700  |
| C | 1.12399200  | 4.70685200  | 0.58264800  |
| H | 1.32866500  | 5.67325900  | 1.04236900  |
| H | 2.04109800  | 4.12564000  | 0.47755500  |
| H | 0.64523600  | 4.83634600  | -0.38925600 |
| C | -2.92883900 | 0.23312400  | -2.31436800 |
| C | -2.19867600 | 0.61065600  | -3.62469800 |
| H | -1.21187600 | 0.16444800  | -3.68620000 |
| H | -2.77793500 | 0.31595100  | -4.50843600 |
| H | -2.05611600 | 1.69620700  | -3.66457100 |
| C | -3.38755400 | -1.24213000 | -2.29727800 |
| H | -2.55481900 | -1.92555700 | -2.12762100 |
| H | -4.08653400 | -1.40525200 | -1.47008800 |
| H | -3.89600700 | -1.53067700 | -3.22591100 |
| C | -4.22173000 | 1.09439100  | -2.31755300 |
| H | -4.77419600 | 0.91724200  | -3.24774500 |
| H | -4.89751900 | 0.84589300  | -1.49651300 |
| H | -3.99603400 | 2.16342000  | -2.26717000 |
| N | -3.67744700 | 2.05036400  | 0.55443200  |
| C | -2.97483400 | 3.15275100  | 0.90923200  |
| H | -3.35856500 | 3.66448800  | 1.78625200  |
| C | -4.80992000 | 1.56358100  | 1.23814600  |
| C | -5.57863300 | 2.37008800  | 2.09315000  |
| C | -5.21114500 | 0.23364300  | 1.02024500  |
| C | -6.69779900 | 1.84092600  | 2.73729400  |
| H | -5.33407100 | 3.41692000  | 2.23884000  |
| C | -6.33778900 | -0.27850800 | 1.65647300  |
| H | -4.61535300 | -0.39808700 | 0.37251800  |
| C | -7.08678000 | 0.51708800  | 2.52759300  |
| H | -7.27850200 | 2.48076400  | 3.39578700  |
| H | -6.62345900 | -1.31096500 | 1.47451600  |
| H | -7.96450600 | 0.11625200  | 3.02497600  |
| C | -2.39107900 | 4.06774600  | -0.09430300 |
| C | -1.88706600 | 3.62849600  | -1.33090500 |
| C | -2.36200700 | 5.43986400  | 0.20834400  |
| C | -1.41506600 | 4.55497500  | -2.25842700 |
| H | -1.84238000 | 2.56339500  | -1.53211600 |
| C | -1.88477100 | 6.36184500  | -0.72172300 |
| H | -2.72930500 | 5.78720200  | 1.17094200  |
| C | -1.41866500 | 5.92217900  | -1.96386100 |
| H | -1.03866300 | 4.20510100  | -3.21576900 |
| H | -1.88401900 | 7.42079700  | -0.48029900 |
| H | -1.05555000 | 6.64035700  | -2.69382200 |
| H | -3.20229900 | 1.41694300  | -0.12911600 |
| C | 5.26617700  | -2.20135600 | 4.80807000  |
| H | 4.92529700  | -2.73869200 | 5.70607600  |
| H | 5.32343800  | -1.12864400 | 5.05540200  |
| H | 6.27682000  | -2.54859000 | 4.56854100  |
| O | 4.43803900  | -2.45611400 | 3.68728500  |

## 2R3R-TS-dis

|    |             |             |             |
|----|-------------|-------------|-------------|
| Yb | 0.33120000  | -0.10602300 | 0.02027300  |
| O  | -1.95995600 | 0.34528200  | 0.35830600  |
| O  | -2.50535500 | -0.28222100 | 3.35693700  |
| O  | 0.58436200  | 1.78925900  | 1.26675100  |
| O  | 0.75263100  | 1.50056400  | -1.52445800 |
| N  | -2.93175000 | 1.15939400  | 0.90602800  |
| N  | -4.72486300 | -0.72942600 | 3.63229100  |
| H  | -5.64421800 | -0.62476700 | 3.22472900  |
| N  | 0.58083400  | 3.12438800  | 0.88417100  |
| N  | 0.67370800  | 3.61110500  | -2.52745300 |
| H  | 0.21969000  | 5.22459000  | -1.95425300 |
| C  | -2.35566700 | 2.12623200  | 1.96390800  |
| H  | -1.54697600 | 1.56494600  | 2.41459500  |
| H  | -3.14655800 | 2.27308600  | 2.70365700  |
| C  | -1.89510400 | 3.49698800  | 1.48611400  |
| H  | -2.73421000 | 4.07592100  | 1.08524800  |
| H  | -1.60004400 | 4.03709700  | 2.39275500  |
| C  | -0.79787900 | 3.56306500  | 0.43849000  |
| H  | -1.02105600 | 2.90789300  | -0.39777200 |
| H  | -0.69892600 | 4.58284000  | 0.05580100  |
| C  | -3.60892800 | 1.92657600  | -0.21889700 |
| H  | -2.80862700 | 2.39191600  | -0.78755700 |
| H  | -4.21556300 | 2.71212800  | 0.24520800  |
| C  | -4.45922500 | 1.07959200  | -1.13309700 |



|   |             |             |             |
|---|-------------|-------------|-------------|
| C | -4.78009600 | 1.59222800  | -2.39614700 |
| H | -4.36945900 | 2.54868600  | -2.70884400 |
| C | -5.61679200 | 0.88141900  | -3.25392600 |
| H | -5.86443500 | 1.28922800  | -4.22924700 |
| C | -6.13042400 | -0.35677900 | -2.85522600 |
| H | -6.78788500 | -0.91461500 | -3.51577500 |
| C | -5.79407300 | -0.87680200 | -1.60608900 |
| H | -6.18062200 | -1.84531000 | -1.29771900 |
| C | -4.96141900 | -0.16317000 | -0.73560900 |
| C | -4.54364300 | -0.74370200 | 0.59043100  |
| H | -3.74789800 | -1.47832600 | 0.44736000  |
| H | -5.37939500 | -1.27727600 | 1.05505100  |
| C | -4.05397500 | 0.32718200  | 1.56568000  |
| H | -4.85811800 | 1.05460500  | 1.73132900  |
| C | -3.65801900 | -0.25862900 | 2.94305100  |
| C | -4.67040100 | -1.36228200 | 4.98162900  |
| C | -3.79151100 | -2.62279400 | 4.92864300  |
| H | -4.18154600 | -3.33411400 | 4.19248200  |
| H | -3.78708100 | -3.11010500 | 5.90934900  |
| H | -2.76483500 | -2.36832200 | 4.65996200  |
| C | -4.11952900 | -0.35237200 | 6.00290600  |
| H | -3.09966300 | -0.06065100 | 5.74341000  |
| H | -4.11072900 | -0.80223200 | 7.00130900  |
| H | -4.74820700 | 0.54460100  | 6.03742500  |
| C | -6.11658800 | -1.73971200 | 5.33335800  |
| H | -6.52934300 | -2.45203600 | 4.60843400  |
| H | -6.76376200 | -0.85432300 | 5.36729900  |
| H | -6.14749100 | -2.21173400 | 6.31947500  |
| C | 1.03498800  | 3.94500700  | 2.06488300  |
| H | 0.71656000  | 4.97666600  | 1.87259100  |
| H | 0.48176700  | 3.55402000  | 2.91940700  |
| C | 2.52136600  | 3.89576300  | 2.32290600  |
| C | 2.98599000  | 4.32759000  | 3.57097800  |
| H | 2.27227900  | 4.60977900  | 4.34208100  |
| C | 4.35229300  | 4.40723700  | 3.83105200  |
| H | 4.70113200  | 4.74531500  | 4.80227300  |
| C | 5.26696200  | 4.05583200  | 2.83478800  |
| H | 6.33447700  | 4.12643900  | 3.02263700  |
| C | 4.80456000  | 3.61585800  | 1.59588300  |
| H | 5.51266500  | 3.33830400  | 0.81835200  |
| C | 3.43279900  | 3.52199600  | 1.32892500  |
| C | 2.93241700  | 2.97380600  | 0.01745200  |
| H | 2.94374800  | 1.88566100  | 0.05431400  |
| H | 3.57671800  | 3.28627900  | -0.81223200 |
| C | 1.52252500  | 3.42865500  | -0.30963400 |
| H | 1.47781100  | 4.51342400  | -0.41355800 |
| C | 0.94336400  | 2.78126800  | -1.57144200 |
| C | 0.05691900  | 3.15573600  | -3.78939100 |
| C | -0.12361400 | 4.41698900  | -4.65218100 |
| H | 0.84611800  | 4.88863100  | -4.84598800 |
| H | -0.75692700 | 5.14774900  | -4.13542900 |
| H | -0.58831100 | 4.17310200  | -5.61454500 |
| C | 0.96573500  | 2.15449200  | -4.52653600 |
| H | 1.94136800  | 2.61093900  | -4.72794100 |
| H | 0.51966400  | 1.86300200  | -5.48522700 |
| H | 1.11983800  | 1.25892700  | -3.92287500 |
| C | -1.32864000 | 2.53328100  | -3.51086600 |
| H | -1.96022600 | 3.26184000  | -2.98496000 |
| H | -1.23790100 | 1.63481700  | -2.89786800 |
| H | -1.83156000 | 2.26639600  | -4.44798000 |
| O | 0.29950800  | -2.13351100 | 0.84380300  |
| C | 0.13226100  | -1.22731800 | -3.22172600 |
| C | -0.35525000 | -1.51754900 | -4.49886100 |
| C | -1.73228400 | -1.56528600 | -4.70629700 |
| C | -2.58063900 | -1.32969400 | -3.62747300 |
| C | -2.01219900 | -1.03429800 | -2.38620700 |
| N | -0.69445500 | -0.97215900 | -2.17715100 |
| H | -2.13157600 | -1.79210500 | -5.69034700 |
| H | 0.34115400  | -1.71907400 | -5.30633500 |
| H | -3.65939200 | -1.35567200 | -3.72790600 |
| H | -2.62045000 | -0.81820200 | -1.52096600 |
| C | 1.56363000  | -1.25223700 | -2.94474500 |
| H | 2.24022500  | -1.51335000 | -3.76382100 |
| N | 1.98332500  | -1.02535300 | -1.75132500 |
| C | 3.30321700  | -1.18190900 | -1.36772700 |
| H | 4.09652500  | -1.19176200 | -2.11440000 |
| C | 3.56834100  | -0.53583600 | -0.10088800 |
| O | 2.65850500  | -0.19825600 | 0.68642200  |
| O | 4.85583200  | -0.38671100 | 0.18691700  |
| C | 5.19188000  | 0.08477300  | 1.51218100  |
| H | 6.26658100  | 0.26243200  | 1.48381000  |
| H | 4.65292400  | 1.00340200  | 1.74376800  |
| H | 4.94996500  | -0.68569800 | 2.24500100  |
| C | -0.32954100 | -2.94049700 | 1.84145800  |
| C | -1.84192800 | -2.93195400 | 1.58359600  |
| H | -2.17144000 | -1.89689600 | 1.55808800  |
| H | -2.06328100 | -3.39631000 | 0.61466700  |
| H | -2.39941800 | -3.46851500 | 2.35959800  |

---

|   |             |             |             |
|---|-------------|-------------|-------------|
| C | 0.16239400  | -4.40202100 | 1.78808600  |
| H | -0.04638800 | -4.85822000 | 0.81496900  |
| H | 1.23523600  | -4.48618500 | 1.98084400  |
| H | -0.35639400 | -4.99590800 | 2.54934500  |
| C | -0.01532200 | -2.34436000 | 3.22477900  |
| H | -0.48260800 | -2.92370700 | 4.03048800  |
| H | 1.06646200  | -2.33683000 | 3.39690100  |
| H | -0.38370800 | -1.31754500 | 3.28718200  |
| C | 0.70565500  | 7.12733100  | -1.77155400 |
| H | 0.35575900  | 7.98702200  | -1.19076000 |
| H | 0.61943400  | 7.37929000  | -2.83923300 |
| H | 1.77297900  | 6.97275600  | -1.54317900 |
| O | -0.09173300 | 6.00876500  | -1.42212000 |
| N | 1.97232700  | -3.62400000 | -0.81528300 |
| C | 3.28071300  | -3.26996900 | -0.79414200 |
| H | 3.84721200  | -3.58154600 | -1.66628900 |
| C | 1.28980300  | -4.19311700 | -1.90858400 |
| C | 1.94335600  | -4.84710300 | -2.96476600 |
| C | -0.11510600 | -4.13333900 | -1.90492100 |
| C | 1.19965000  | -5.39990900 | -4.00810900 |
| H | 3.02371300  | -4.95011200 | -2.97285600 |
| C | -0.84450600 | -4.69967500 | -2.94588400 |
| H | -0.61133500 | -3.60491000 | -1.09972000 |
| C | -0.19508500 | -5.33135100 | -4.00969400 |
| H | 1.72025000  | -5.90379500 | -4.81787000 |
| H | -1.92880600 | -4.63249200 | -2.92966700 |
| H | -0.76535800 | -5.77157300 | -4.82201600 |
| C | 4.04950000  | -3.30001600 | 0.46512100  |
| C | 3.45807900  | -3.02786100 | 1.71008100  |
| C | 5.41552900  | -3.61943500 | 0.41176500  |
| C | 4.20839900  | -3.13170300 | 2.87879100  |
| H | 2.42630300  | -2.70465400 | 1.74821900  |
| C | 6.16652100  | -3.71196000 | 1.58264100  |
| H | 5.88784300  | -3.80971000 | -0.54898900 |
| C | 5.56209900  | -3.47967900 | 2.82095200  |
| H | 3.73564700  | -2.93104800 | 3.83632600  |
| H | 7.21916400  | -3.97382000 | 1.52904100  |
| H | 6.14371700  | -3.56322100 | 3.73457900  |
| H | 1.35723700  | -3.17593800 | -0.10322200 |

---

---

## (L) References

- 1 Y. H. Wen, J. L. Huang, Y. Xiong, B. Qin and X. M. Feng, *Synlett*, **2005**, 2445.
- 2 (a) A. Yanagisawa, H. Saito, M. Harada and T. Arai, *Adv. Synth. Catal.*, 2005, **347**, 1517; (b) J. L. G. Ruano, J. Alemán, I. Alonso, A. Parra, V. Marcos and J. Aguirre, *Chem. -Eur. J.*, 2007, **13**, 6179; (c) S. Hayashi, H. Yorimitsu and K. Oshima, *Angew. Chem., Int. Ed.*, 2009, **48**, 7224; (d) P. Eisenberger, A. M. Bailey and C. M. Crudden, *J. Am. Chem. Soc.*, 2012, **134**, 17384; (e) A. Yanagisawa, Y. Lin, R. Miyake and K. Yoshida, *Org. Lett.*, 2014, **16**, 86.
- 3 J. Chen, X. Gong, J. Li, Y. Li, J. Ma, C. Hou, G. Zhao, W. Yuan and B. Zhao, *Science*, 2018, **360**, 1438.
- 4 M. J. Frisch, G. W. Trucks, H. B. Schlegel, G. E. Scuseria, M. A. Robb, J. R. Cheeseman, G. Scalmani, V. Barone, G. A. Petersson, H. Nakatsuji, X. Li, M. Caricato, A. V. Marenich, J. Bloino, B. G. Janesko, R. Gomperts, B. Mennucci, H. P. Hratchian, J. V. Ortiz, A. F. Izmaylov, J. L. Sonnenberg, Williams, F. Ding, F. Lipparini, F. Egidi, J. Goings, B. Peng, A. Petrone, T. Henderson, D. Ranasinghe, V. G. Zakrzewski, J. Gao, N. Rega, G. Zheng, W. Liang, M. Hada, M. Ehara, K. Toyota, R. Fukuda, J. Hasegawa, M. Ishida, T. Nakajima, Y. Honda, O. Kitao, H. Nakai, T. Vreven, K. Throssell, J. A. Montgomery Jr., J. E. Peralta, F. Ogliaro, M. J. Bearpark, J. J. Heyd, E. N. Brothers, K. N. Kudin, V. N. Staroverov, T. A. Keith, R. Kobayashi, J. Normand, K. Raghavachari, A. P. Rendell, J. C. Burant, S. S. Iyengar, J. Tomasi, M. Cossi, J. M. Millam, M. Klene, C. Adamo, R. Cammi, J. W. Ochterski, R. L. Martin, K. Morokuma, O. Farkas, J. B. Foresman and D. J. Fox, 2013, Gaussian 09, Rev. D.01; Gaussian, Inc.; Wallingford CT.
- 5 P. J. Stephens, F. J. Devlin, C. F. Chabalowski and M. J. Frisch, *J. Phys. Chem.*, 1994, **98**, 11623.
- 6 S. Grimme, S. A. J. Fau-Ehrlich, H. E. S. Fau-Krieg and H. Krieg, *J. Chem. Phys.*, 2010, **132**, 154104.
- 7(a) M. Dolg, H. Stoll and A. Savin, *Theor. Chim. Acta.*, 1989, **75**, 173; (b) M. Dolg, H. Stoll and H. Preuss, *Theor. Chim. Acta.*, 1993, **85**, 441.
- 8 (a) R. Ditchfield, W. J. Hehre and J. A. Pople, *J. Chem. Phys.*, 1971, **54**, 724; (b) W. J. Hehre, R. Ditchfield and J. A. Pople, *J. Chem. Phys.*, 1972, **56**, 2257; (c) P. C. Hariharan and J. A. Pople, *Theor. Chim. Acta.*, 1973, **28**, 213.
- 9 A. V. Marenich, C. J. Cramer and D. G. Truhlar, *J. Phys. Chem. B.*, 2009, **113**, 6378.
10. CYLview, 1.0b; C. Y. Legault, Université de Sherbrooke, 2009. (<http://www.cylview.org>)

## (M) The Analytical and Spectral Characterization Data of the Products

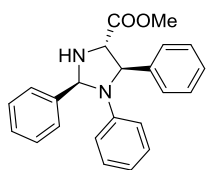

**3a**

$[\text{M}+\text{H}^+] = 359.1754$ , found 359.1754.

**Methyl (2S,4S,5R)-1,2,5-triphenylimidazolidine-4-carboxylate (3a): Procedure A:** 62% yield, Colorless oil;  $R_f = 0.4$  (petroleum ether/ethyl acetate = 7/1); Dissolved in iPrOH for HPLC; **HPLC** (Chiralcel IA, hexane/iPrOH = 90/10, flow rate 1.0 mL/min,  $\lambda = 254$  nm) major isomer:  $t_r$  (major) = 10.26 min,  $t_r$  (minor) = 8.27 min, ee = 97%; minor isomer:  $t_r$  (major) = 7.71 min. dr = 94:6 determined by  $^1\text{H}$  NMR.  $[\alpha]_D^{24} = +26.1$  ( $c = 0.82$ , in tetrahydrofuran).  $^1\text{H}$  NMR (400 MHz,  $\text{CDCl}_3$ )  $\delta$  7.73 – 7.69 (m, 2H), 7.58 – 7.55 (m, 2H), 7.44 – 7.33 (m, 6H), 7.13 – 7.07 (m, 2H), 6.76 – 6.72 (m, 1H), 6.55 – 6.52 (m, 2H), 5.73 (s, 1H), 4.92 (d,  $J = 4.8$  Hz, 1H), 3.96 (d,  $J = 4.4$  Hz, 1H), 3.79 (s, 3H), 2.98 (s, 1H) ppm;  $^{13}\text{C}\{^1\text{H}\}$  NMR (101 MHz,  $\text{CDCl}_3$ )  $\delta$  172.2, 147.0, 142.1, 140.9, 128.9, 128.8, 128.7, 128.3, 127.7, 127.1, 126.3, 118.4, 114.5, 79.9, 69.8, 67.7, 52.5 ppm; **IR** (neat)  $\nu$  ( $\text{cm}^{-1}$ ): 3028, 1739, 1599, 1502, 1451, 1331, 1210, 1135, 1028, 751, 669; **HRMS** (ESI-FT) calcd for  $\text{C}_{23}\text{H}_{23}\text{N}_2\text{O}_2^+$

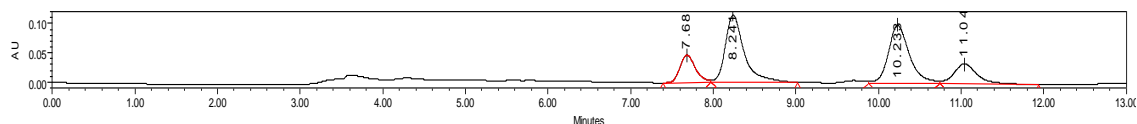

|   | Retention Time | Area    | % Area |
|---|----------------|---------|--------|
| 1 | 7.682          | 627557  | 12.70  |
| 2 | 8.241          | 1837118 | 37.18  |
| 3 | 10.233         | 1786501 | 36.15  |
| 4 | 11.041         | 690451  | 13.97  |

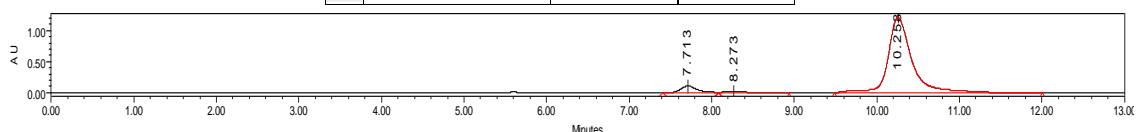

|   | Retention Time | Area     | % Area |
|---|----------------|----------|--------|
| 1 | 7.713          | 1468086  | 5.70   |
| 2 | 8.273          | 321664   | 1.25   |
| 3 | 10.258         | 23979606 | 93.05  |

**Procedure B:** 55% yield, Colorless oil;  $R_f = 0.4$  (petroleum ether/ethyl acetate = 7/1); Dissolved in iPrOH for HPLC; **HPLC** (Chiralcel IA, hexane/iPrOH = 90/10, flow rate 1.0 mL/min,  $\lambda = 254$  nm) major isomer:  $t_r$  (major) = 10.22 min,  $t_r$  (minor) = 8.23 min, ee = 96%; minor isomer:  $t_r$  (major) = 7.68 min. dr = 93:7 determined by  $^1\text{H}$  NMR.  $[\alpha]_D^{24} = +25.0$  ( $c = 0.24$ , in tetrahydrofuran).

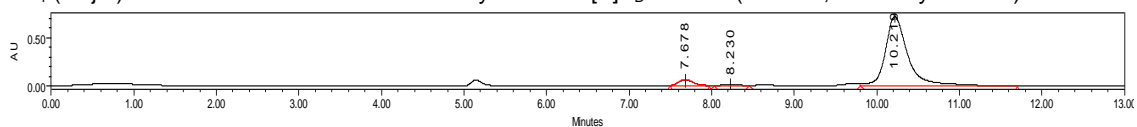

|   | Retention Time | Area     | % Area |
|---|----------------|----------|--------|
| 1 | 7.678          | 740070   | 5.05   |
| 2 | 8.230          | 251502   | 1.72   |
| 3 | 10.219         | 13662953 | 93.23  |

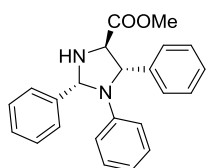

**(2R,4R,5S)-3a**

**Methyl (2R,4R,5S)-1,2,5-triphenylimidazolidine-4-carboxylate [(2R,4R,5S)-3a]: Procedure A:** 50% yield, Colorless oil;  $R_f = 0.4$  (petroleum ether/ethyl acetate = 7/1); Dissolved in iPrOH for HPLC; **HPLC** (Chiralcel IA, hexane/iPrOH = 90/10, flow rate 1.0 mL/min,  $\lambda = 254$  nm) major isomer:  $t_r$  (major) = 8.26 min,  $t_r$  (minor) = 10.27 min, ee = -95%; minor isomer:  $t_r$  (major) = 11.08 min,  $t_r$  (minor) = 7.71 min. dr = 90:10 determined by  $^1\text{H}$  NMR.  $[\alpha]_D^{27} = -36.8$  ( $c = 0.32$ , in tetrahydrofuran).  $^1\text{H}$  NMR (400 MHz,  $\text{CDCl}_3$ )  $\delta$  7.73 – 7.70 (m, 2H), 7.58 – 7.55 (m, 2H), 7.45 – 7.39 (m, 4H), 7.35 – 7.31 (m, 2H), 7.12 – 7.08 (m, 2H), 6.77 – 6.73 (m, 1H), 6.56 – 6.53 (m, 2H), 5.73 (s, 1H), 4.93 (d,  $J = 4.8$  Hz, 1H), 3.97 (d,  $J = 4.4$  Hz, 1H), 3.79 (s, 3H), 2.99 (s, 1H) ppm;  $^{13}\text{C}\{^1\text{H}\}$  NMR (101 MHz,  $\text{CDCl}_3$ )  $\delta$  172.2, 147.0, 142.1, 140.9, 128.90, 128.85, 128.79, 128.7, 128.5, 128.4, 127.7, 127.1,

126.9, 126.3, 118.4, 115.0, 114.5, 79.9, 69.8, 67.7, 52.5 ppm.

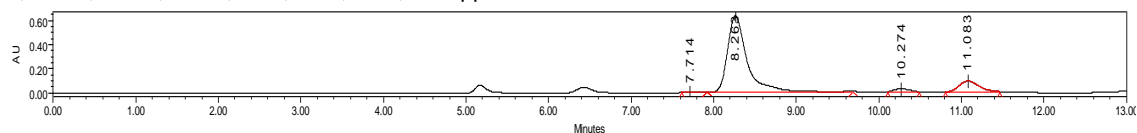

|   | Retention Time | Area     | % Area |
|---|----------------|----------|--------|
| 1 | 7.714          | 48196    | 0.38   |
| 2 | 8.263          | 10661227 | 85.02  |
| 3 | 10.274         | 315843   | 2.52   |
| 4 | 11.083         | 1514176  | 12.08  |

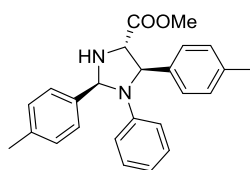

**3b**

**Methyl (2S,4S,5R)-1-phenyl-2,5-di-p-tolylimidazolidine-4-carboxylate (3b): Procedure A:** 46% yield, Colorless oil;  $R_f = 0.4$  (petroleum ether/ethyl acetate = 7/1); Dissolved in iPrOH for HPLC; **HPLC** (Chiralcel IA, hexane/iPrOH = 90/10, flow rate 1.0 mL/min,  $\lambda = 254$  nm) major isomer:  $t_r$  (major) = 8.93 min,  $t_r$  (minor) = 6.83 min, ee = 93%; minor isomer:  $t_r$  (major) = 6.11 min. dr = 93:7 determined by  $^1\text{H NMR}$ .  $[\alpha]_D^{28} = +45.2$  ( $c = 0.25$ , in tetrahydrofuran).  $^1\text{H NMR}$  (400 MHz,  $\text{CDCl}_3$ )  $\delta$  7.60 – 7.57 (m, 2H), 7.46 – 7.43 (m, 2H), 7.24 – 7.19 (m, 4H), 7.11 – 7.07 (m, 2H), 6.75 – 6.71 (m, 1H), 6.55 – 6.49 (m, 2H), 5.68 (s, 1H), 4.88 (d,  $J = 4.4$  Hz, 1H), 3.94 (d,  $J = 4.6$  Hz, 1H), 3.78 (s, 3H), 2.38 (s, 3H), 2.37 (s, 3H) ppm;  $^{13}\text{C}\{^1\text{H}\}$  NMR (101 MHz,  $\text{CDCl}_3$ )  $\delta$  172.3, 147.0, 139.1, 138.0, 137.9, 137.3, 129.5, 129.4, 128.8, 127.0, 126.2, 118.1, 114.4, 79.7, 69.5, 67.7, 52.5, 21.2, 21.1 ppm; IR (neat)  $\nu$  ( $\text{cm}^{-1}$ ): 2953, 1740, 1600, 1502, 1445, 1326, 1207, 1177, 1135, 815, 752, 694; HRMS (ESI-FT) calcd for  $\text{C}_{25}\text{H}_{27}\text{N}_2\text{O}_2^+$  ( $[\text{M}]+\text{H}^+$ ) = 387.2067,

found 387.2060.

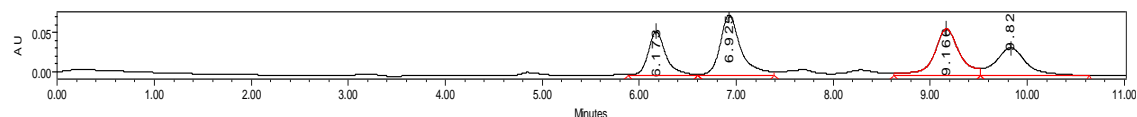

|   | Retention Time | Area    | % Area |
|---|----------------|---------|--------|
| 1 | 6.173          | 696038  | 19.08  |
| 2 | 6.925          | 1131237 | 31.00  |
| 3 | 9.166          | 1068414 | 29.28  |
| 4 | 9.829          | 753188  | 20.64  |

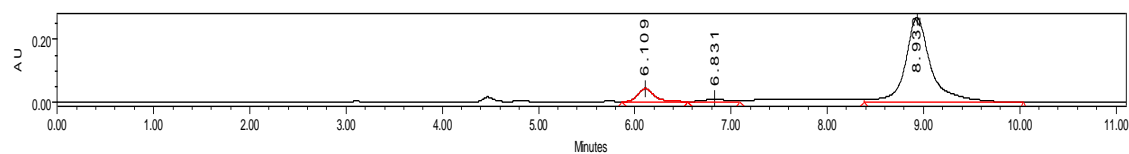

|   | Retention Time | Area    | % Area |
|---|----------------|---------|--------|
| 1 | 6.109          | 552803  | 9.59   |
| 2 | 6.831          | 179704  | 3.12   |
| 3 | 8.932          | 5030252 | 87.29  |

**Procedure B:** 40% yield, Colorless oil;  $R_f = 0.4$  (petroleum ether/ethyl acetate = 7/1); Dissolved in iPrOH for HPLC; **HPLC** (Chiralcel IA, hexane/iPrOH = 90/10, flow rate 1.0 mL/min,  $\lambda = 254$  nm) major isomer:  $t_r$  (major) = 9.19 min,  $t_r$  (minor) = 6.94 min, ee = 88%; minor isomer:  $t_r$  (major) = 6.18 min. dr = 88:12 determined by  $^1\text{H NMR}$ .  $[\alpha]_D^{28} = +39.6$  ( $c = 0.23$ , in tetrahydrofuran).

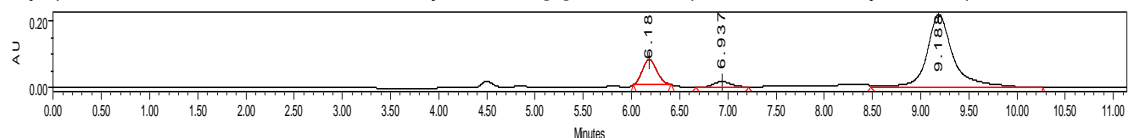

|   | Retention Time | Area    | % Area |
|---|----------------|---------|--------|
| 1 | 6.183          | 795097  | 14.99  |
| 2 | 6.937          | 267500  | 5.04   |
| 3 | 9.188          | 4241378 | 79.97  |

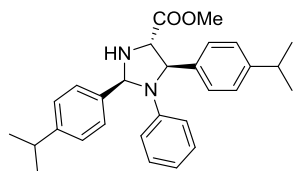

3c

**Methyl (2S,4S,5R)-2,5-bis(4-isopropylphenyl)-1-phenylimidazolidine-4-carboxylate (3c):**

**Procedure A:** 38% yield, Colorless oil;  $R_f = 0.4$  (petroleum ether/ethyl acetate = 8/1); Dissolved in iPrOH for HPLC; **HPLC** (Chiralcel IF, hexane/iPrOH = 98/2, flow rate 1.0 mL/min,  $\lambda = 254$  nm) major isomer:  $t_r$  (major) = 12.83 min,  $t_r$  (minor) = 11.87 min, ee = 93%; minor isomer:  $t_r$  (major) = 17.41 min,  $t_r$  (minor) = 11.54 min. dr = 88:12 determined by  $^1\text{H NMR}$ .  $[\alpha]_D^{29} = +20.1$  ( $c = 0.30$ , in tetrahydrofuran).

$^1\text{H NMR}$  (400 MHz,  $\text{CDCl}_3$ )  $\delta$  7.63 – 7.59 (m, 2H), 7.52 – 7.42 (m, 2H), 7.28 – 7.24 (m, 4H), 7.13 – 7.09 (m, 2H), 6.76 – 6.72 (m, 1H), 6.56 – 6.51 (m, 2H), 5.69 (s, 1H), 4.91 (d,  $J = 4.0$  Hz, 1H), 3.97 (d,  $J = 4.4$  Hz, 1H), 3.79 (s, 3H), 2.99 – 2.85 (m, 3H), 1.29 – 1.26 (m, 12H) ppm;  $^{13}\text{C}\{^1\text{H}\}$  NMR (101 MHz,  $\text{CDCl}_3$ )  $\delta$  172.4, 148.9, 148.2, 147.0, 139.5, 138.1, 128.8, 127.0, 126.9, 126.7, 126.2, 118.1, 114.5, 79.7, 69.5, 67.6, 52.5, 33.8, 33.7, 23.99, 23.97 ppm; **IR** (neat)  $\nu$  ( $\text{cm}^{-1}$ ): 2959, 1741, 1599, 1502, 1461,

1329, 1211, 1132, 828, 751, 693; **HRMS** (ESI-FT) calcd for  $\text{C}_{29}\text{H}_{35}\text{N}_2\text{O}_2^+$  ( $[\text{M}+\text{H}]^+$ ) = 443.2693, found 443.2686.

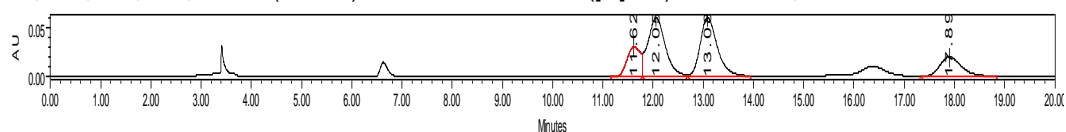

|   | Retention Time | Area    | % Area |
|---|----------------|---------|--------|
| 1 | 11.620         | 562681  | 13.99  |
| 2 | 12.059         | 1454207 | 36.15  |
| 3 | 13.086         | 1399731 | 34.79  |
| 4 | 17.898         | 606276  | 15.07  |

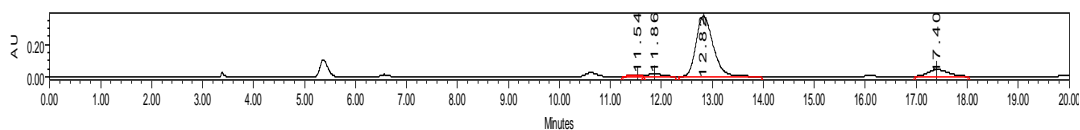

|   | Retention Time | Area    | % Area |
|---|----------------|---------|--------|
| 1 | 11.542         | 157892  | 1.54   |
| 2 | 11.869         | 318090  | 3.10   |
| 3 | 12.826         | 8660043 | 84.38  |
| 4 | 17.406         | 1127486 | 10.99  |

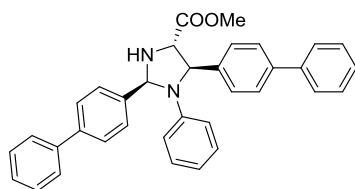

3d

**Methyl (2S,4S,5R)-2,5-di[(1,1'-biphenyl)-4-yl]-1-phenylimidazolidine-4-carboxylate (3d):**

**Procedure A:** 50% yield, Colorless oil;  $R_f = 0.4$  (petroleum ether/ethyl acetate = 6/1); Dissolved in iPrOH for HPLC; **HPLC** (Chiralcel IA, hexane/iPrOH = 90/10, flow rate 1.0 mL/min,  $\lambda = 254$  nm) major isomer:  $t_r$  (major) = 19.58 min,  $t_r$  (minor) = 14.05 min, ee = 93%; minor isomer:  $t_r$  (major) = 10.32 min,  $t_r$  (minor) = 15.37 min. dr = 89:11 determined by  $^1\text{H NMR}$ .  $[\alpha]_D^{25} = +31.8$  ( $c = 0.38$ , in tetrahydrofuran).

$^1\text{H NMR}$  (400 MHz,  $\text{CDCl}_3$ )  $\delta$  7.83 – 7.78 (m, 2H), 7.69 – 7.60 (m, 10H), 7.49 – 7.43 (m, 4H), 7.39 – 7.35 (m, 2H), 7.19 – 7.12 (m, 2H), 6.81 – 6.76 (m, 1H), 6.64 – 6.57 (m, 2H), 5.81 (s, 1H), 4.99 (d,  $J = 4.8$  Hz, 1H), 4.04 (d,  $J = 4.8$  Hz, 1H), 3.83 (s, 3H), 3.08 (s, 1H) ppm;  $^{13}\text{C}\{^1\text{H}\}$  NMR (101 MHz,  $\text{CDCl}_3$ )  $\delta$  172.2, 141.3, 141.0, 140.7, 140.6, 139.9, 128.9,

128.8, 128.7, 127.6, 127.6, 127.5, 127.4, 127.3, 127.1, 127.0, 126.8, 118.5, 114.5, 79.7, 69.6, 67.7, 52.6 ppm; **IR** (neat)  $\nu$  ( $\text{cm}^{-1}$ ): 2928, 1729, 1599, 1502, 1459, 1269, 1253, 1102, 1028, 732 ppm; **HRMS** (ESI-FT) calcd for  $\text{C}_{35}\text{H}_{31}\text{N}_2\text{O}_2^+$  ( $[\text{M}+\text{H}]^+$ ) = 511.2380, found 511.2375.

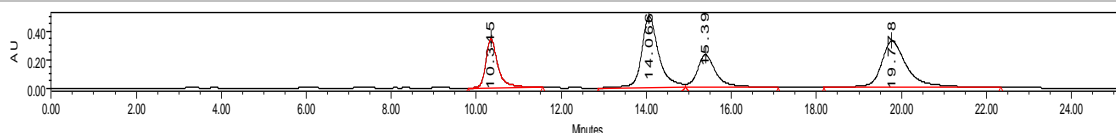

|   | Retention Time | Area     | % Area |
|---|----------------|----------|--------|
| 1 | 10.345         | 6839070  | 16.33  |
| 2 | 14.066         | 14176457 | 33.85  |
| 3 | 15.390         | 7191904  | 17.17  |
| 4 | 19.778         | 13671541 | 32.65  |

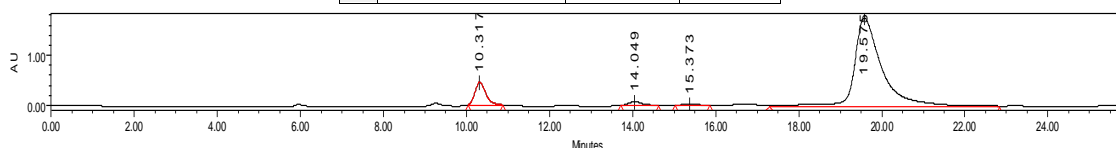

|   | Retention Time | Area     | % Area |
|---|----------------|----------|--------|
| 1 | 10.317         | 8084947  | 8.99   |
| 2 | 14.049         | 1639612  | 1.82   |
| 3 | 15.373         | 801555   | 0.89   |
| 4 | 19.575         | 79441521 | 88.30  |

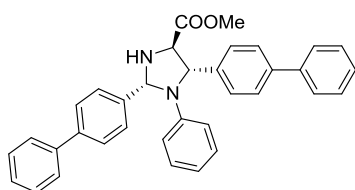

(2R,4R,5S)-3d

128.9, 128.8, 127.63, 127.57, 127.5, 127.4, 127.3, 127.1, 127.04, 126.98, 126.8, 118.5, 114.5, 79.7, 69.6, 67.7, 52.6 ppm.

**Methyl (2R,4R,5S)-2,5-di[(1,1'-biphenyl)-4-yl]-1-phenylimidazolidine-4-carboxylate [(2R,4R,5S)-3d]:** Procedure A: 38% yield, Colorless oil;  $R_f = 0.4$  (petroleum ether/ethyl acetate = 7/1); Dissolved in iPrOH for HPLC; HPLC (Chiralcel IA, hexane/iPrOH = 90/10, flow rate 1.0 mL/min,  $\lambda = 254$  nm) major isomer:  $t_r$  (major) = 13.06 min,  $t_r$  (minor) = 18.18 min, ee = -95%; minor isomer:  $t_r$  (major) = 14.19 min,  $t_r$  (minor) = 9.67. dr = 88:12 determined by  $^1\text{H NMR}$ .  $[\alpha]_D^{29} = -45.7$  ( $c = 0.40$ , in tetrahydrofuran).  $^1\text{H NMR}$  (400 MHz,  $\text{CDCl}_3$ )  $\delta$  7.82 – 7.79 (m, 2H), 7.71 – 7.56 (m, 10H), 7.49 – 7.43 (m, 4H), 7.40 – 7.34 (m, 2H), 7.18 – 7.13 (m, 2H), 6.81 – 6.76 (m, 1H), 6.64 – 6.60 (m, 2H), 5.81 (s, 1H), 4.99 (d,  $J = 4.8$  Hz, 1H), 4.04 (d,  $J = 4.8$  Hz, 1H), 3.83 (s, 3H), 3.08 (s, 1H) ppm;  $^{13}\text{C}\{^1\text{H}\}$  NMR (101 MHz,  $\text{CDCl}_3$ )  $\delta$  172.2, 146.9, 141.3, 141.1, 140.7, 139.9,

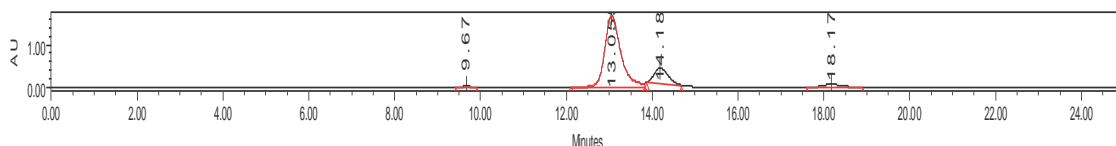

|   | Retention Time | Area     | % Area |
|---|----------------|----------|--------|
| 1 | 9.674          | 475370   | 0.86   |
| 2 | 13.055         | 44468600 | 80.07  |
| 3 | 14.188         | 8197771  | 14.76  |
| 4 | 18.175         | 2394749  | 4.31   |

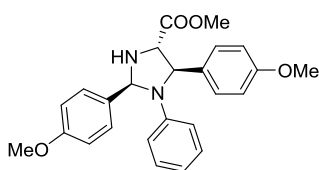

3e

**Methyl (2S,4S,5R)-2,5-bis(4-methoxyphenyl)-1-phenylimidazolidine-4-carboxylate (3e):** Procedure A: 31% yield, Colorless oil;  $R_f = 0.4$  (petroleum ether/ethyl acetate = 3/1); Dissolved in iPrOH for HPLC; HPLC (Chiralcel IF, hexane/iPrOH = 90/10, flow rate 1.0 mL/min,  $\lambda = 254$  nm) major isomer:  $t_r$  (major) = 18.64 min,  $t_r$  (minor) = 16.77 min, ee = 73%; minor isomer:  $t_r$  (major) = 17.80 min,  $t_r$  (minor) = 24.76, ee = 63%. dr = 82:18 determined by  $^1\text{H NMR}$ .  $[\alpha]_D^{23} = +12.4$  ( $c = 0.20$ , in tetrahydrofuran,  $\lambda = 546$  nm).  $^1\text{H NMR}$  (400 MHz,  $\text{CDCl}_3$ )  $\delta$  7.62 – 7.59 (m, 2H), 7.47 – 7.44 (m, 2H), 7.12 – 7.07 (m, 3H), 6.96 – 6.91 (m, 4H), 6.75 – 6.71 (m, 1H), 6.55 – 6.51 (d,  $J = 8.1$  Hz, 2H), 5.65 (s, 1H), 4.84 (d,  $J = 4.8$  Hz, 1H), 3.91 (d,  $J = 4.8$  Hz, 1H), 3.83 (s, 3H), 3.82 (s, 3H), 3.77 (s, 3H). ppm;  $^{13}\text{C}\{^1\text{H}\}$  NMR (101 MHz,  $\text{CDCl}_3$ )  $\delta$  172.3, 159.6, 159.1, 147.0, 134.1, 133.1, 128.8, 128.3, 128.1, 127.5, 118.2, 114.5, 114.3,

114.1, 79.5, 69.2, 67.7, 55.32, 55.29, 52.4 ppm; IR (neat)  $\nu$  (cm<sup>-1</sup>): 2953, 1741, 1605, 1508, 1456, 1302, 1240, 1174, 1033, 832, 752; HRMS (ESI-FT) calcd for C<sub>25</sub>H<sub>27</sub>N<sub>2</sub>O<sub>4</sub><sup>+</sup> ([M]+H<sup>+</sup>) = 419.1965, found 419.1963.

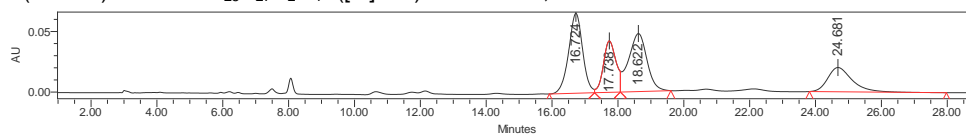

|   | Retention Time | Area    | % Area |
|---|----------------|---------|--------|
| 1 | 16.724         | 1942662 | 32.52  |
| 2 | 17.738         | 1121509 | 18.78  |
| 3 | 18.622         | 1876647 | 31.42  |
| 4 | 24.681         | 1032450 | 17.28  |

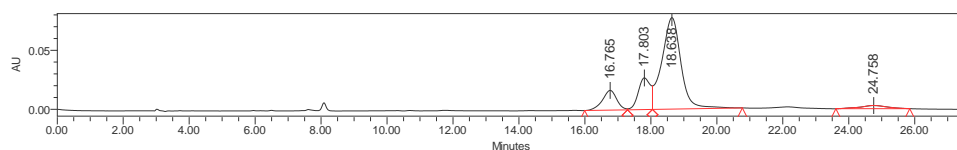

|   | Retention Time | Area    | % Area |
|---|----------------|---------|--------|
| 1 | 16.765         | 504513  | 11.29  |
| 2 | 17.803         | 688150  | 15.40  |
| 3 | 18.638         | 3118901 | 69.80  |
| 4 | 24.758         | 157022  | 3.51   |

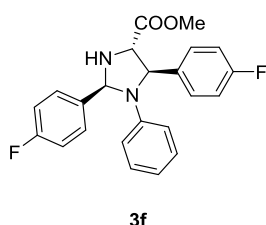

**Methyl (2S,4S,5R)-2,5-bis(4-fluorophenyl)-1-phenylimidazolidine-4-carboxylate (3f): Procedure A:** 53% yield, Colorless oil; R<sub>f</sub> = 0.4 (petroleum ether/ethyl acetate = 6/1); Dissolved in iPrOH for HPLC; **HPLC** (Chiralcel IA, hexane/iPrOH = 90/10, flow rate 1.0 mL/min, λ = 254 nm) major isomer: t<sub>r</sub> (major) = 9.39 min, t<sub>r</sub> (minor) = 7.71 min, ee = 96%; minor isomer: t<sub>r</sub> (major) = 6.95 min, t<sub>r</sub> (minor) = 12.33 min. dr = 94:6 determined by <sup>1</sup>H NMR. [α]<sub>D</sub><sup>24</sup> = +38.9 (c = 0.33, in tetrahydrofuran). **<sup>1</sup>H NMR (400 MHz, CDCl<sub>3</sub>)** δ 7.68 – 7.63 (m, 2H), 7.51 – 7.46 (m, 2H), 7.15 – 7.06 (m, 6H), 6.80 – 6.75 (m, 1H), 6.52 – 6.49 (m, 2H), 5.70 (s, 1H), 4.85 (d, J = 5.2 Hz, 1H), 3.89 – 3.85 (m, 1H), 3.79 (s, 3H), 3.01 (s, 1H) ppm; **<sup>13</sup>C{<sup>1</sup>H} NMR (101 MHz, CDCl<sub>3</sub>)** δ 171.9, 162.7 (d, J<sub>CF</sub> = 247.2 Hz), 162.3 (d, J<sub>CF</sub> = 247.8 Hz), 146.7, 137.52, 137.49, 136.8, 129.0, 128.8 (d, J<sub>CF</sub> = 8.1 Hz), 128.7, 127.9 (d, J<sub>CF</sub> = 8.1 Hz), 118.7, 116.0, 115.7, 115.5, 114.4, 79.3, 69.3, 67.6, 52.6 ppm; **<sup>19</sup>F{<sup>1</sup>H} (376 MHz, CDCl<sub>3</sub>)** δ -113.9, -114.6 ppm; **IR (neat)  $\nu$  (cm<sup>-1</sup>):** 2954, 1739, 1600, 1594, 1504, 1435, 1324, 1221, 1156, 1099, 835, 752, 694; **HRMS (ESI-FT) calcd for C<sub>23</sub>H<sub>21</sub>F<sub>2</sub>N<sub>2</sub>O<sub>2</sub><sup>+</sup> ([M]+H<sup>+</sup>) = 395.1566,**

found 395.1562.

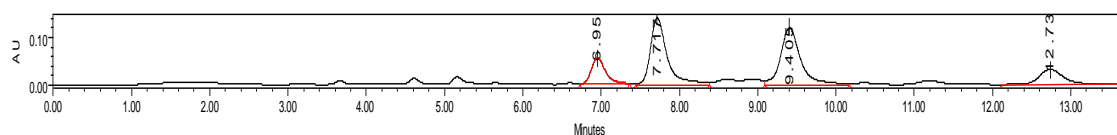

|   | Retention Time | Area    | % Area |
|---|----------------|---------|--------|
| 1 | 6.953          | 674939  | 12.11  |
| 2 | 7.717          | 2110532 | 37.87  |
| 3 | 9.405          | 2123280 | 38.10  |
| 4 | 12.735         | 663995  | 11.92  |



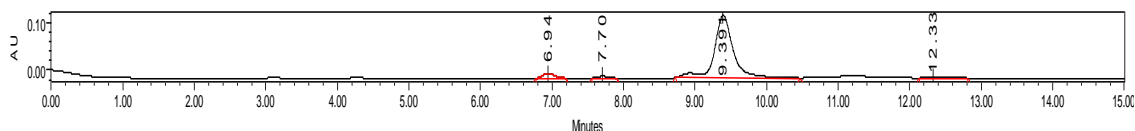

|   | Retention Time | Area    | % Area |
|---|----------------|---------|--------|
| 1 | 6.946          | 108686  | 4.23   |
| 2 | 7.706          | 40879   | 1.59   |
| 3 | 9.391          | 2408537 | 93.69  |
| 4 | 12.331         | 12523   | 0.49   |

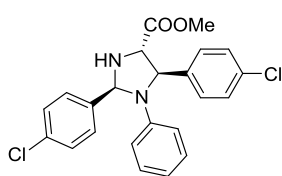

3g

**Methyl (2S,4S,5R)-2,5-bis(4-chlorophenyl)-1-phenylimidazolidine-4-carboxylate (3g): Procedure A:** 55% yield, Colorless oil;  $R_f = 0.4$  (petroleum ether/ethyl acetate = 6/1); Dissolved in iPrOH for HPLC; **HPLC** (Chiralcel IF, hexane/iPrOH = 90/10, flow rate 1.0 mL/min,  $\lambda = 254$  nm) major isomer:  $t_r$  (major) = 9.08 min,  $t_r$  (minor) = 8.63 min, ee = 91%; minor isomer:  $t_r$  (major) = 11.70 min,  $t_r$  (minor) = 27.55 min. dr = 93:7 determined by  $^1\text{H NMR}$ .  $[\alpha]_D^{28} = +71.4$  ( $c = 0.23$ , in tetrahydrofuran).  **$^1\text{H NMR}$  (400 MHz,  $\text{CDCl}_3$ )**  $\delta$  7.68 – 7.59 (m, 2H), 7.45 – 7.34 (m, 6H), 7.15 – 7.10 (m, 2H), 6.81 – 6.76 (m, 1H), 6.51 – 6.47 (m, 2H), 5.69 (s, 1H), 4.83 (d,  $J = 5.2$  Hz, 1H), 3.86 (d,  $J = 4.8$  Hz, 1H), 3.79 (s, 3H), 3.03 (s, 1H) ppm;  **$^{13}\text{C}\{^1\text{H}\}$  NMR (101 MHz,  $\text{CDCl}_3$ )**  $\delta$  171.8, 146.6, 140.242 139.5, 134.2, 133.6, 129.2, 129.1, 129.0, 128.9, 128.6, 127.7, 118.9, 114.3, 79.3, 69.3, 67.6, 52.6 ppm; **IR (neat)  $\nu$  ( $\text{cm}^{-1}$ ):** 2925, 1739, 1599, 1490, 1327, 1210, 1138, 1090, 1013, 824, 751, 694; **HRMS (ESI-FT)** calcd for  $\text{C}_{23}\text{H}_{21}^{35}\text{Cl}_2\text{N}_2\text{O}_2^+$  ( $[\text{M}]+\text{H}^+$ ) = 427.0975, found 427.0975, calcd for  $\text{C}_{23}\text{H}_{21}^{37}\text{Cl}_2\text{N}_2\text{O}_2^+$  ( $[\text{M}]+\text{H}^+$ ) = 429.0945, found 429.0942, calcd for  $\text{C}_{23}\text{H}_{21}^{37}\text{Cl}_2\text{N}_2\text{O}_2^+$  ( $[\text{M}]+\text{H}^+$ ) = 430.0975, found 430.0975.

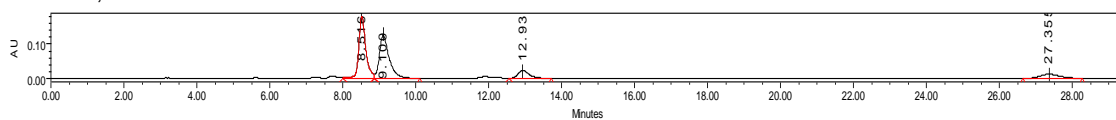

|   | Retention Time | Area    | % Area |
|---|----------------|---------|--------|
| 1 | 8.516          | 2308119 | 42.19  |
| 2 | 9.100          | 2252552 | 41.17  |
| 3 | 12.930         | 450915  | 8.24   |
| 4 | 27.355         | 459318  | 8.40   |

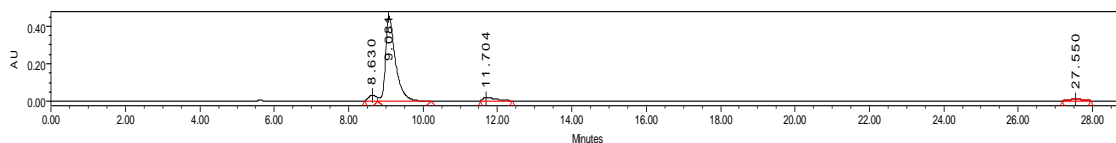

|   | Retention Time | Area    | % Area |
|---|----------------|---------|--------|
| 1 | 8.630          | 437967  | 4.67   |
| 2 | 9.081          | 8280607 | 88.39  |
| 3 | 11.704         | 430458  | 4.59   |
| 4 | 27.550         | 219570  | 2.34   |

**Procedure B:** 53% yield, Colorless oil;  $R_f = 0.4$  (petroleum ether/ethyl acetate = 6/1); Dissolved in iPrOH for HPLC; **HPLC** (Chiralcel IF, hexane/iPrOH = 90/10, flow rate 1.0 mL/min,  $\lambda = 254$  nm) major isomer:  $t_r$  (major) = 9.05 min,  $t_r$  (minor) = 8.61 min, ee = 91%; minor isomer:  $t_r$  (major) = 11.66 min,  $t_r$  (minor) = 27.15 min. dr = 94:6 determined by  $^1\text{H NMR}$ .  $[\alpha]_D^{28} = +61.5$  ( $c = 0.29$ , in tetrahydrofuran).

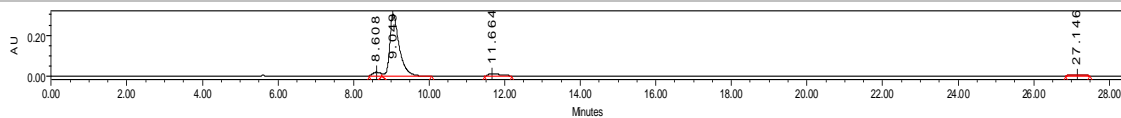

|   | Retention Time | Area    | % Area |
|---|----------------|---------|--------|
| 1 | 8.608          | 241989  | 4.14   |
| 2 | 9.049          | 5256353 | 89.96  |
| 3 | 11.664         | 238290  | 4.08   |
| 4 | 27.146         | 106306  | 1.82   |

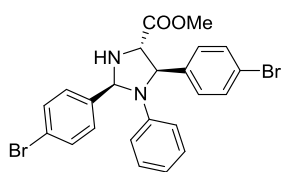

3h

**Methyl (2S,4S,5R)-2,5-bis(4-bromophenyl)-1-phenylimidazolidine-4-carboxylate (3h): Procedure A:** 66% yield, Pale yellow oil;  $R_f = 0.4$  (petroleum ether/ethyl acetate = 6/1); Dissolved in iPrOH for HPLC; **HPLC** (Chiralcel IF, hexane/iPrOH = 90/10, flow rate 1.0 mL/min,  $\lambda = 254$  nm) major isomer:  $t_r$  (major) = 10.44 min,  $t_r$  (minor) = 10.06 min, ee = 96%; minor isomer:  $t_r$  (major) = 34.66 min,  $t_r$  (minor) = 16.29 min. dr = 95:5 determined by  $^1\text{H}$  NMR.  $[\alpha]_D^{24} = +41.4$  ( $c = 0.49$ , in tetrahydrofuran).  $^1\text{H}$  NMR (400 MHz,  $\text{CDCl}_3$ )  $\delta$  7.56 – 7.50 (m, 6H), 7.39 – 7.36 (m, 2H), 7.15 – 7.10 (m, 2H), 6.81 – 6.77 (m, 1H), 6.50 – 6.47 (m, 2H), 5.68 (s, 1H), 4.81 (d,  $J = 5.2$  Hz, 1H), 3.89 – 3.82 (m, 1H), 3.79 (s, 3H), 3.03 (s, 1H) ppm;  $^{13}\text{C}\{^1\text{H}\}$  NMR (101 MHz,  $\text{CDCl}_3$ )  $\delta$  171.7, 146.6, 140.7, 140.0, 132.1, 131.9, 129.1, 128.9, 128.1, 122.4, 121.7, 118.9, 114.3, 79.3, 69.4, 67.5, 52.6 ppm; **IR** (neat)  $\nu(\text{cm}^{-1})$ : 2950, 1739, 1599, 1502, 1487, 1434, 1405, 1328, 1211, 1137, 1071, 1010, 820, 751, 694; **HRMS** (ESI-FT) calcd for  $\text{C}_{23}\text{H}_{21}^{79}\text{Br}^{81}\text{BrN}_2\text{O}_2^+$  ( $[\text{M}+\text{H}]^+$ ) = 514.9954, found 514.9964, calcd for  $\text{C}_{23}\text{H}_{21}^{79}\text{Br}^{81}\text{BrN}_2\text{O}_2^+$  ( $[\text{M}+\text{H}]^+$ ) = 516.994, found 516.9933, calcd for  $\text{C}_{23}\text{H}_{21}^{81}\text{Br}_2\text{N}_2\text{O}_2^+$  ( $[\text{M}+\text{H}]^+$ ) = 518.9923, found 518.9910.

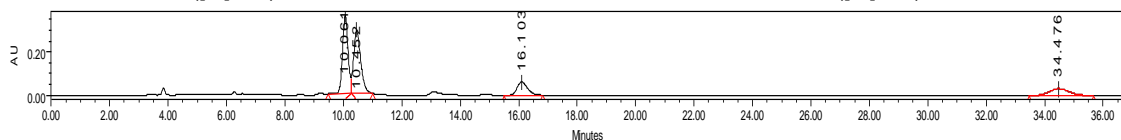

|   | Retention Time | Area    | % Area |
|---|----------------|---------|--------|
| 1 | 10.061         | 4757102 | 37.12  |
| 2 | 10.452         | 4981487 | 38.87  |
| 3 | 16.103         | 1536507 | 11.99  |
| 4 | 34.476         | 1540402 | 12.02  |

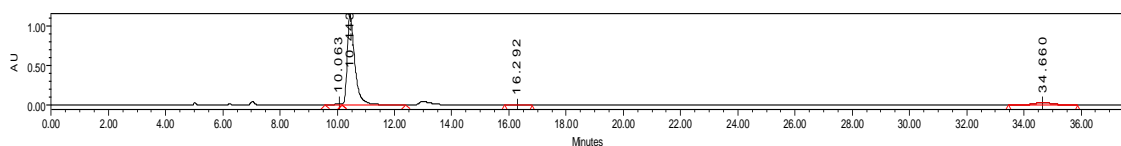

|   | Retention Time | Area     | % Area |
|---|----------------|----------|--------|
| 1 | 10.063         | 357117   | 1.56   |
| 2 | 10.443         | 20957493 | 91.65  |
| 3 | 16.292         | 83617    | 0.37   |
| 4 | 34.660         | 1469577  | 6.43   |

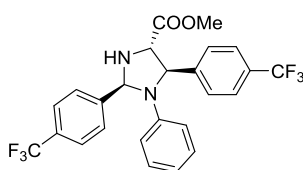

3i

**Methyl (2S,4S,5R)-1-phenyl-2,5-bis[4-(trifluoromethyl)phenyl]imidazolidine-4-carboxylate (3i): Procedure A:** 52% yield, Colorless oil;  $R_f = 0.4$  (petroleum ether/ethyl acetate = 7/1); Dissolved in iPrOH for HPLC; **HPLC** (Chiralcel IA, hexane/iPrOH = 90/10, flow rate 1.0 mL/min,  $\lambda = 254$  nm) major isomer:  $t_r$  (major) = 9.15 min,  $t_r$  (minor) = 8.16 min, ee = 93%; minor isomer:  $t_r$  (major) = 10.55 min,  $t_r$  (minor) = 16.29 min. dr = 92:8 determined by  $^1\text{H}$  NMR.  $[\alpha]_D^{22} = +17.7$  ( $c = 0.30$ , in tetrahydrofuran,  $\lambda = 546$  nm).  $^1\text{H}$  NMR (400 MHz,  $\text{CDCl}_3$ )  $\delta$  7.84 – 7.81 (m, 2H), 7.72 – 7.69 (m, 2H), 7.68 – 7.61 (m), 7.17 – 7.12 (m, 2H), 6.86 – 6.79 (m, 1H), 6.51 – 6.47 (m, 2H), 5.81 (s, 1H), 4.93 (d,  $J = 5.6$  Hz, 1H), 3.88 (d,  $J = 5.6$  Hz, 1H), 3.81 (s, 3H), 3.13 (s, 1H) ppm;  $^{13}\text{C}\{^1\text{H}\}$  NMR (101 MHz,  $\text{CDCl}_3$ )  $\delta$  171.6, 146.5, 145.6, 145.0, 129.2, 127.6, 126.9 (q,  $J_{\text{CF}} = 273.0$  Hz) 126.7, 126.3 (q,  $J_{\text{CF}} = 273.2$  Hz) 126.1 (q,  $J_{\text{CF}} = 3.6$  Hz), 125.8

(q,  $J_{CF} = 3.7$  Hz), 119.2, 114.3, 79.4, 69.6, 67.5, 52.7 ppm;  $^{19}\text{F}\{^1\text{H}\}$  (376 MHz,  $\text{CDCl}_3$ )  $\delta$  -62.53, -62.54 ppm IR (neat)  $\nu$  ( $\text{cm}^{-1}$ ): 2919, 1740, 1600, 1501, 1420, 1320, 1165, 1068, 837, 753; HRMS (ESI-FT) calcd for  $\text{C}_{25}\text{H}_{21}\text{F}_6\text{N}_2\text{O}_2^+$  ( $[\text{M}+\text{H}]^+$ ) = 495.1502, found 495.1503.

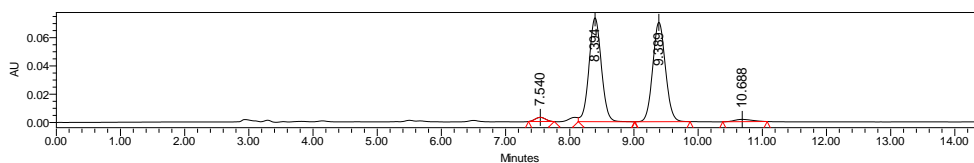

|   | Retention Time | Area   | % Area |
|---|----------------|--------|--------|
| 1 | 7.540          | 33411  | 1.67   |
| 2 | 8.394          | 975548 | 48.64  |
| 3 | 9.389          | 965337 | 48.13  |
| 4 | 10.688         | 31333  | 1.56   |

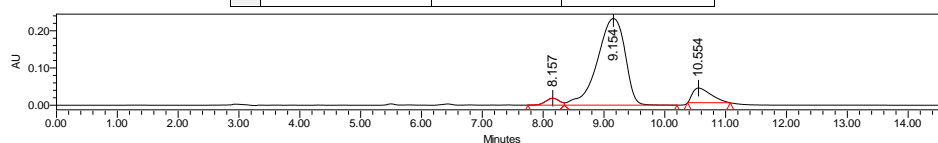

|   | Retention Time | Area    | % Area |
|---|----------------|---------|--------|
| 1 | 8.157          | 290424  | 3.44   |
| 2 | 9.154          | 7334844 | 86.76  |
| 3 | 10.554         | 828927  | 9.80   |

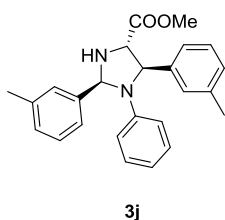

**Methyl (2S,4S,5R)-1-phenyl-2,5-di-*m*-tolylimidazolidine-4-carboxylate (3h): Procedure A:** 43% yield, Colorless oil;  $R_f = 0.4$  (petroleum ether/ethyl acetate = 7/1); Dissolved in iPrOH for HPLC; HPLC (Chiralcel IF, hexane/iPrOH = 90/10, flow rate 1.0 mL/min,  $\lambda = 254$  nm) major isomer:  $t_r$  (major) = 9.94 min,  $t_r$  (minor) = 9.38 min, ee = 92%; minor isomer:  $t_r$  (major) = 12.90 min,  $t_r$  (minor) = 8.93 min. dr = 94:6 determined by  $^1\text{H}$  NMR.  $[\alpha]_D^{26} = +27.5$  ( $c = 0.28$ , in tetrahydrofuran).  $^1\text{H}$  NMR (400 MHz,  $\text{CDCl}_3$ )  $\delta$  7.55 – 7.50 (m, 2H), 7.39 – 7.37 (m, 2H), 7.33 – 7.29 (m, 2H), 7.20 – 7.17 (m, 1H), 7.13 – 7.08 (m, 3H), 6.77 – 6.73 (m, 1H), 6.55 – 6.53 (m, 2H), 5.67 (s, 1H), 4.90 (d,  $J = 4.4$  Hz, 1H), 3.96 (d,  $J = 4.4$  Hz, 1H), 3.79 (s, 3H), 2.92 (s, 1H), 2.40 (s, 3H), 2.37 (s, 3H) ppm;  $^{13}\text{C}\{^1\text{H}\}$  NMR (101 MHz,  $\text{CDCl}_3$ )  $\delta$  172.3, 147.0, 142.2, 140.7, 138.5, 138.4, 129.1, 128.8, 128.7, 128.6, 128.4, 127.8, 126.9, 124.1, 123.4, 118.2, 114.5, 79.9, 69.7, 67.7, 52.5, 21.6, 21.5 ppm; IR (neat)  $\nu$  ( $\text{cm}^{-1}$ ): 2921, 1739, 1600, 1502, 1447, 1329, 1204, 1037, 752, 694; HRMS (ESI-FT) calcd for  $\text{C}_{25}\text{H}_{27}\text{N}_2\text{O}_2^+$  ( $[\text{M}+\text{H}]^+$ ) = 387.2067, found 387.2064.

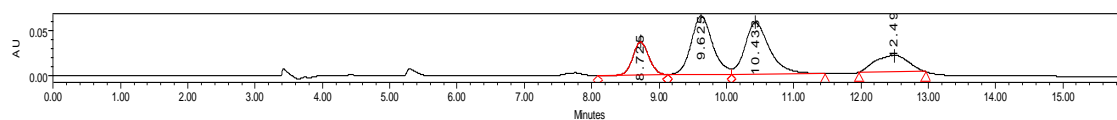

|   | Retention Time | Area    | % Area |
|---|----------------|---------|--------|
| 1 | 8.725          | 607912  | 14.83  |
| 2 | 9.625          | 1435081 | 35.01  |
| 3 | 10.433         | 1440446 | 35.14  |
| 4 | 12.495         | 615945  | 15.03  |

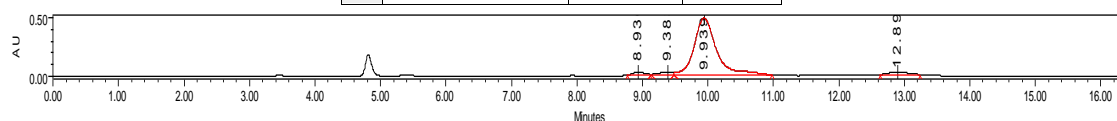

|   | Retention Time | Area | % Area |
|---|----------------|------|--------|
| 1 | 8.919          |      |        |
| 2 | 9.238          |      |        |
| 3 | 9.913          |      |        |
| 4 | 12.268         |      |        |

|   |        |          |       |
|---|--------|----------|-------|
| 1 | 8.930  | 252023   | 1.93  |
| 2 | 9.383  | 471068   | 3.61  |
| 3 | 9.939  | 11897297 | 91.17 |
| 4 | 12.895 | 429023   | 3.29  |

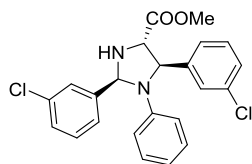

3k

**Methyl (2S,4S,5R)-2,5-bis(3-chlorophenyl)-1-phenylimidazolidine-4-carboxylate (3k): Procedure A:** 62% yield, Pale yellow oil;  $R_f = 0.4$  (petroleum ether/ethyl acetate = 6/1); Dissolved in iPrOH for HPLC; **HPLC** (Chiralcel IA, hexane/iPrOH = 90/10, flow rate 1.0 mL/min,  $\lambda = 254$  nm) major isomer:  $t_r$  (major) = 7.82 min,  $t_r$  (minor) = 6.76 min, ee = 97%; minor isomer:  $t_r$  (major) = 6.31 min,  $t_r$  (minor) = 7.27 min. dr = 94:6 determined by  $^1\text{H NMR}$ .  $[\alpha]_D^{23} = +35.0$  ( $c = 0.39$ , in tetrahydrofuran).  $^1\text{H NMR}$  (400 MHz,  $\text{CDCl}_3$ )  $\delta$  7.71 – 7.69 (m, 1H), 7.60 – 7.55 (m, 1H), 7.51 – 7.49 (m, 1H), 7.42 – 7.31 (m, 5H), 7.17 – 7.13 (m, 2H), 6.83 – 6.79 (m, 1H), 6.53 – 6.50 (m, 2H), 5.69 (d,  $J = 5.6$  Hz, 1H), 4.84 (d,  $J = 5.2$  Hz, 1H), 3.92 – 3.86 (m, 1H), 3.80 (s, 3H), 3.05 (s, 1H) ppm;  $^{13}\text{C}\{^1\text{H}\}$  NMR (101 MHz,  $\text{CDCl}_3$ )  $\delta$  171.7, 146.5, 143.8, 143.0, 134.9, 134.8, 130.3, 130.1, 129.1, 128.6, 128.1, 127.3, 126.5, 125.3, 124.5, 119.0, 114.3, 79.3, 69.4, 67.5, 52.7 ppm; **IR** (neat)  $\nu$  ( $\text{cm}^{-1}$ ): 2952, 1740, 1598, 1575, 1502, 1475, 1434, 1325, 1205, 1077, 1000, 873, 789, 751, 693; **HRMS** (ESI-FT) calcd for  $\text{C}_{23}\text{H}_{21}^{35}\text{Cl}_2\text{N}_2\text{O}_2^+$  ( $[\text{M}+\text{H}]^+$ ) = 427.0975, found 427.0968, calcd for  $\text{C}_{23}\text{H}_{21}^{35}\text{Cl}^{37}\text{Cl}\text{N}_2\text{O}_2^+$  ( $[\text{M}+\text{H}]^+$ ) = 429.0945, found 429.0936, calcd for  $\text{C}_{23}\text{H}_{21}^{37}\text{Cl}_2\text{N}_2\text{O}_2^+$  ( $[\text{M}+\text{H}]^+$ ) = 430.0975, found 430.0970.

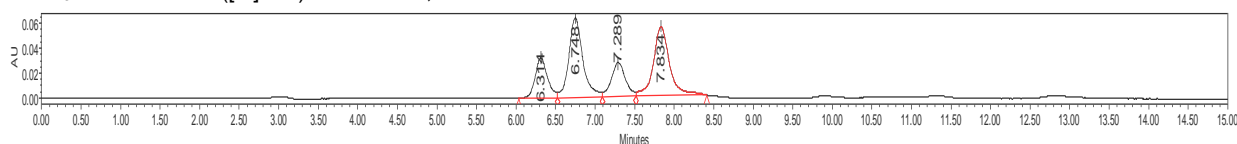

|   | Retention Time | Area   | % Area |
|---|----------------|--------|--------|
| 1 | 6.314          | 349856 | 15.40  |
| 2 | 6.748          | 789522 | 34.76  |
| 3 | 7.289          | 337320 | 14.85  |
| 4 | 7.834          | 794667 | 34.99  |

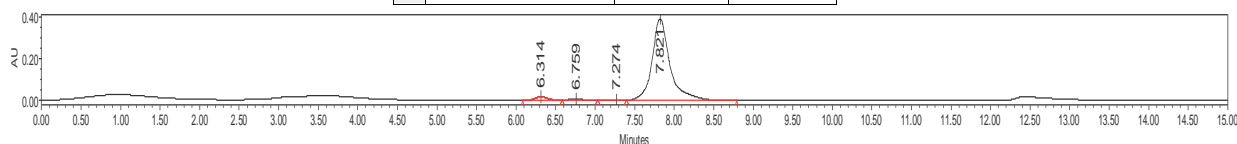

|   | Retention Time | Area    | % Area |
|---|----------------|---------|--------|
| 1 | 6.314          | 202371  | 3.11   |
| 2 | 6.759          | 94301   | 1.45   |
| 3 | 7.274          | 35710   | 0.55   |
| 4 | 7.821          | 6166290 | 94.89  |

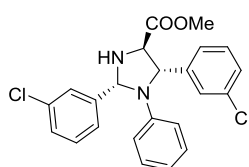

(2R,4R,5S)-3k

**Methyl (2R,4R,5S)-2,5-bis(3-chlorophenyl)-1-phenylimidazolidine-4-carboxylate [(2R,4R,5S)-3k]: Procedure A:** 45% yield, Pale yellow oil;  $R_f = 0.4$  (petroleum ether/ethyl acetate = 7/1); Dissolved in iPrOH for HPLC; **HPLC** (Chiralcel IA, hexane/iPrOH = 90/10, flow rate 1.0 mL/min,  $\lambda = 254$  nm) major isomer:  $t_r$  (major) = 6.68 min,  $t_r$  (minor) = 7.34 min, ee = -90%; minor isomer:  $t_r$  (major) = 7.12 min,  $t_r$  (minor) = 6.28 min. dr = 86:14 determined by  $^1\text{H NMR}$ .  $[\alpha]_D^{28} = -38.8$  ( $c = 0.41$ , in tetrahydrofuran).  $^1\text{H NMR}$  (400 MHz,  $\text{CDCl}_3$ )  $\delta$  7.71 – 7.69 (m, 1H), 7.59 – 7.56 (m, 1H), 7.51 – 7.49 (m, 1H), 7.41 – 7.32 (m, 5H), 7.16 – 7.13 (m, 2H), 6.83 – 6.79 (m, 1H), 6.54 – 6.49 (m, 2H), 5.69 (s, 1H), 4.83 (d,  $J = 5.2$  Hz, 1H), 3.89 (d,  $J = 5.2$  Hz, 1H), 3.80 (s, 3H), 3.05 (s, 1H) ppm;  $^{13}\text{C}\{^1\text{H}\}$  NMR (101 MHz,  $\text{CDCl}_3$ )  $\delta$  171.7, 146.6, 143.9, 143.1, 134.9, 134.8, 130.3, 130.1, 129.1, 128.7, 128.1, 127.3, 126.6, 125.3, 124.5, 119.0, 114.3, 79.4, 69.4, 67.5, 52.7 ppm.

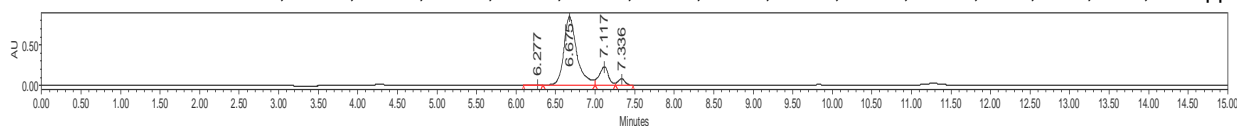

|   | Retention Time | Area | % Area |
|---|----------------|------|--------|
| 1 | 6.277          |      |        |
| 2 | 6.675          |      |        |
| 3 | 7.117          |      |        |
| 4 | 7.336          |      |        |

|   |       |         |       |
|---|-------|---------|-------|
| 1 | 6.277 | 94426   | 0.77  |
| 2 | 6.675 | 9830224 | 79.98 |
| 3 | 7.117 | 1868552 | 15.20 |
| 4 | 7.336 | 498401  | 4.05  |

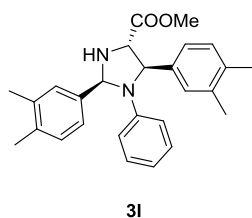

**Methyl (2S,4S,5R)-2,5-bis(3,4-dimethylphenyl)-1-phenylimidazolidine-4-carboxylate (3l): Procedure A:** 39% yield, Colorless oil;  $R_f = 0.4$  (petroleum ether/ethyl acetate = 8/1); Dissolved in iPrOH for HPLC; **HPLC** (Chiralcel IB, hexane/iPrOH = 95/5, flow rate 1.0 mL/min,  $\lambda = 254$  nm) major isomer:  $t_r$  (major) = 7.75 min,  $t_r$  (minor) = 8.50 min, ee = 90%; minor isomer:  $t_r$  (major) = 9.76 min,  $t_r$  (minor) = 10.29 min. dr = 93:7 determined by  $^1\text{H NMR}$ .  $[\alpha]_D^{28} = +18.8$  ( $c = 0.13$ , in tetrahydrofuran).  $^1\text{H NMR}$  (400 MHz,  $\text{CDCl}_3$ )  $\delta$  7.49 – 7.41 (m, 2H), 7.34 – 7.29 (m, 2H), 7.19 – 7.14 (m, 2H), 7.11 – 7.08 (m, 2H), 6.74 – 6.71 (m, 1H), 6.55 – 6.52 (m, 2H), 5.63 (s, 1H), 4.86 (d,  $J = 4.4$  Hz, 1H), 3.94 (d,  $J = 4.0$  Hz, 1H), 3.78 (s, 3H), 3.10 (s, 1H), 2.32 – 2.28 (m, 6H), 2.27 (s, 6H) ppm;  $^{13}\text{C}\{^1\text{H}\}$  NMR (101 MHz,  $\text{CDCl}_3$ )  $\delta$  172.4, 147.1, 139.7, 138.3, 137.0, 136.9, 136.7, 135.9, 130.0, 129.9, 128.8, 128.3, 127.5, 124.4, 123.8, 118.0, 114.4, 79.8, 69.5, 67.8, 52.5, 20.0, 19.9, 19.6, 19.5 ppm; **IR** (neat)  $\nu$  ( $\text{cm}^{-1}$ ): 2920, 1740, 1600, 1502, 1453, 1327, 1202, 1130, 1034, 825, 751, 694; **HRMS** (ESI-FT) calcd for  $\text{C}_{27}\text{H}_{31}\text{N}_2\text{O}_2^+$  ( $[\text{M}+\text{H}]^+$ ) = 415.2380, found 415.2374.

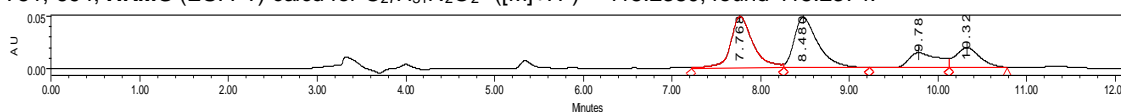

|   | Retention Time | Area   | % Area |
|---|----------------|--------|--------|
| 1 | 7.768          | 858142 | 35.51  |
| 2 | 8.480          | 883921 | 36.57  |
| 3 | 9.782          | 322495 | 13.34  |
| 4 | 10.326         | 352290 | 14.58  |

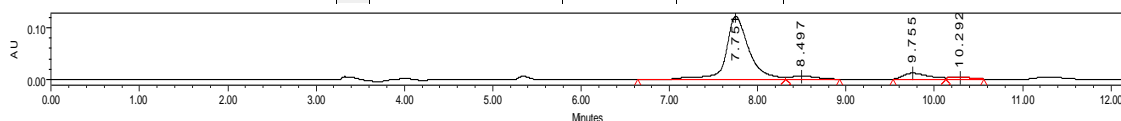

|   | Retention Time | Area    | % Area |
|---|----------------|---------|--------|
| 1 | 7.751          | 2202938 | 84.49  |
| 2 | 8.497          | 125667  | 4.82   |
| 3 | 9.755          | 220742  | 8.47   |
| 4 | 10.292         | 58073   | 2.23   |

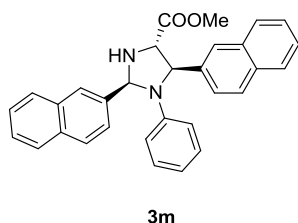

**Methyl (2S,4S,5R)-2,5-di(naphthalen-2-yl)-1-phenylimidazolidine-4-carboxylate (3m): Procedure A:** 50% yield, Pale yellow oil;  $R_f = 0.4$  (petroleum ether/ethyl acetate = 6/1); Dissolved in iPrOH for HPLC; **HPLC** (Chiralcel IC, hexane/iPrOH = 90/10, flow rate 1.0 mL/min,  $\lambda = 254$  nm) major isomer:  $t_r$  (major) = 18.56 min,  $t_r$  (minor) = 11.73 min, ee = 96%; minor isomer:  $t_r$  (major) = 10.74 min,  $t_r$  (minor) = 17.22 min. dr = 93:7 determined by  $^1\text{H NMR}$ .  $[\alpha]_D^{29} = +35.6$  ( $c = 0.33$ , in tetrahydrofuran).  $^1\text{H NMR}$  (400 MHz,  $\text{CDCl}_3$ )  $\delta$  8.28 – 8.26 (m, 1H), 8.14 – 8.12 (m, 1H), 7.98 – 7.90 (m, 5H), 7.88 – 7.81 (m, 2H), 7.73 – 7.69 (m, 1H), 7.55 – 7.49 (m, 4H), 7.13 – 7.08 (m, 2H), 6.78 – 6.74 (m, 1H), 6.67 – 6.64 (m, 2H), 5.95 (s, 1H), 5.14 (d,  $J = 4.8$  Hz, 1H), 4.09 (d,  $J = 4.8$  Hz, 1H), 3.82 (s, 3H), 3.16 (s, 1H) ppm;  $^{13}\text{C}\{^1\text{H}\}$  NMR (101 MHz,  $\text{CDCl}_3$ )  $\delta$  172.2, 147.0, 139.4, 138.3, 133.40, 133.37, 133.3, 133.0, 128.9, 128.7, 128.2, 128.0, 127.74, 127.72, 126.4, 126.32, 126.29, 126.26, 126.0, 125.3, 125.0, 124.4, 118.5, 114.5, 80.2, 70.1, 67.6, 52.6 ppm; **IR** (neat)  $\nu$  ( $\text{cm}^{-1}$ ): 3055, 2958, 1739, 1599, 1501, 1440, 1320, 1208, 1133, 1037, 859, 822, 751, 694; **HRMS** (ESI-FT) calcd for  $\text{C}_{31}\text{H}_{27}\text{N}_2\text{O}_2^+$  ( $[\text{M}+\text{H}]^+$ ) = 459.2067, found 459.2060.

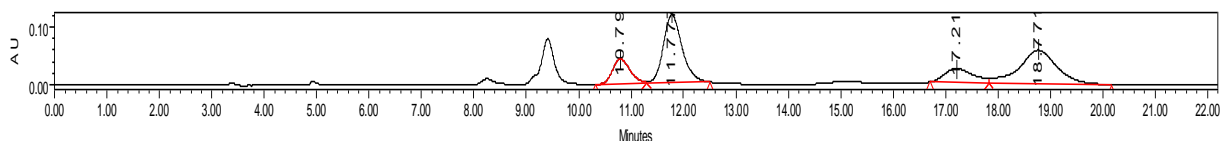

|   | Retention Time | Area    | % Area |
|---|----------------|---------|--------|
| 1 | 11.73          | 125667  | 4.82   |
| 2 | 18.56          | 2202938 | 84.49  |
| 3 | 17.22          | 220742  | 8.47   |
| 4 | 10.74          | 58073   | 2.23   |

|   |        |         |       |
|---|--------|---------|-------|
| 1 | 10.796 | 993419  | 12.93 |
| 2 | 11.777 | 2925697 | 38.07 |
| 3 | 17.211 | 918274  | 11.95 |
| 4 | 18.771 | 2848608 | 37.06 |

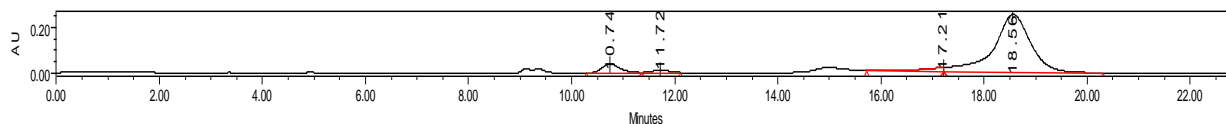

|   | Retention Time | Area     | % Area |
|---|----------------|----------|--------|
| 1 | 10.741         | 942601   | 6.58   |
| 2 | 11.727         | 257395   | 1.80   |
| 3 | 17.217         | 468048   | 3.27   |
| 4 | 18.563         | 12656938 | 88.36  |

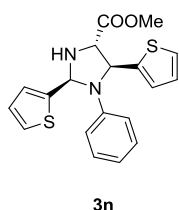

3n

found 371.0875.

**Methyl (2S,4S,5S)-1-phenyl-2,5-di(thiophen-2-yl)imidazolidine-4-carboxylate (3n): Procedure A:** 53% yield, White solid; **m.p.:** 118.5 – 124.0 °C;  $R_f = 0.4$  (petroleum ether/ethyl acetate = 6/1); Dissolved in iPrOH for HPLC; **HPLC** (Chiralcel IB, hexane/iPrOH = 95/5, flow rate 1.0 mL/min,  $\lambda = 254$  nm) major isomer:  $t_r$  (major) = 13.24 min,  $t_r$  (minor) = 14.96 min, ee = 94%. dr = 94:6 determined by  $^1\text{H NMR}$ .  $[\alpha]_D^{29} = +48.5$  ( $c = 0.26$ , in tetrahydrofuran).  $^1\text{H NMR}$  (400 MHz,  $\text{CDCl}_3$ )  $\delta$  7.35 – 7.30 (m, 2H), 7.25 – 7.22 (m, 1H), 7.20 – 7.13 (m, 3H), 7.06 – 7.00 (m, 2H), 6.83 – 6.78 (m, 1H), 6.72 – 6.69 (m, 2H), 5.93 (s, 1H), 5.12 (d,  $J = 5.2$  Hz, 1H), 4.12 (d,  $J = 4.4$  Hz, 1H), 3.80 (s, 3H), 3.23 (s, 1H) ppm;  $^{13}\text{C}\{^1\text{H}\}$  NMR (101 MHz,  $\text{CDCl}_3$ )  $\delta$  171.4, 146.5, 146.2, 145.9, 129.0, 127.2, 127.0, 125.9, 125.7, 124.8, 124.4, 119.1, 114.2, 76.4, 67.9, 65.3, 52.6 ppm; **IR** (neat)  $\nu(\text{cm}^{-1})$ : 2922, 2851, 1738, 1599, 1501, 1437, 1316, 1219, 1125, 1035, 836, 753, 695; **HRMS** (ESI-FT) calcd for  $\text{C}_{19}\text{H}_{19}\text{N}_2\text{O}_2\text{S}_2^+$  ( $[\text{M}+\text{H}]^+$ ) = 371.0882,

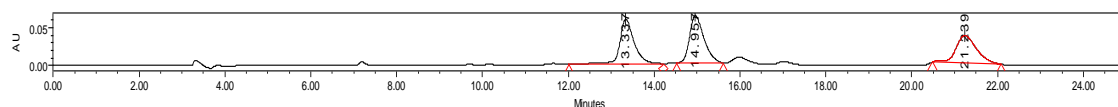

|   | Retention Time | Area    | % Area |
|---|----------------|---------|--------|
| 1 | 13.337         | 1408988 | 34.42  |
| 2 | 14.957         | 1457481 | 35.60  |
| 3 | 21.239         | 1227237 | 29.98  |

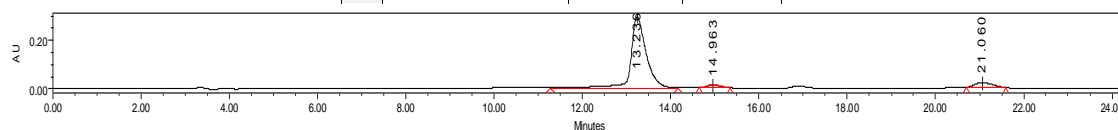

|   | Retention Time | Area    | % Area |
|---|----------------|---------|--------|
| 1 | 13.236         | 7719842 | 91.08  |
| 2 | 14.963         | 218515  | 2.58   |
| 3 | 21.060         | 537577  | 6.34   |

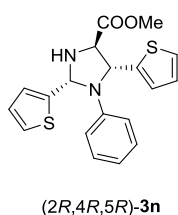

(2R,4R,5R)-3n

**Methyl (2R,4R,5R)-1-phenyl-2,5-di(thiophen-2-yl)imidazolidine-4-carboxylate [(2R,4R,5R)-3n]: Procedure A:** 34% yield, Pale yellow oil;  $R_f = 0.4$  (petroleum ether/ethyl acetate = 6/1); Dissolved in iPrOH for HPLC; **HPLC** (Chiralcel IB, hexane/iPrOH = 95/5, flow rate 1.0 mL/min,  $\lambda = 254$  nm) major isomer:  $t_r$  (major) = 15.42 min,  $t_r$  (minor) = 13.57 min, ee = -95%. dr = 90:10 determined by  $^1\text{H NMR}$ .  $[\alpha]_D^{29} = -49.6$  ( $c = 0.27$ , in tetrahydrofuran).  $^1\text{H NMR}$  (400 MHz,  $\text{CDCl}_3$ )  $\delta$  7.34 – 7.29 (m, 2H), 7.25 – 7.22 (m, 1H), 7.18 – 7.13 (m, 3H), 7.05 – 7.00 (m, 2H), 6.83 – 6.77 (m, 1H), 6.72 – 6.69 (m, 2H), 5.92 (s, 1H), 5.12 (d,  $J = 5.2$  Hz, 1H), 4.11 (d,  $J = 4.8$  Hz, 1H), 3.79 (s, 3H), 3.23 (s, 1H) ppm;  $^{13}\text{C}\{^1\text{H}\}$  NMR (101 MHz,  $\text{CDCl}_3$ )  $\delta$  171.4, 146.5, 146.2, 145.8, 129.0, 127.2, 127.1, 125.9, 125.7, 124.7, 124.4, 119.1, 114.2, 76.4, 67.9, 65.3, 52.6 ppm.

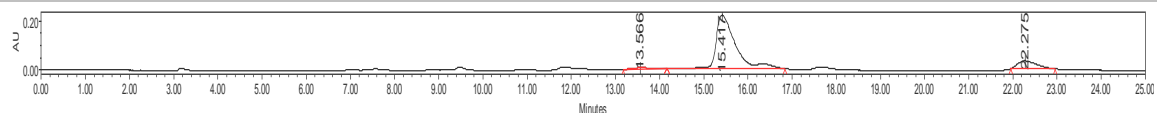

|   | Retention Time | Area    | % Area |
|---|----------------|---------|--------|
| 1 | 13.566         | 202918  | 2.56   |
| 2 | 15.417         | 6765283 | 85.33  |
| 3 | 22.275         | 960204  | 12.11  |

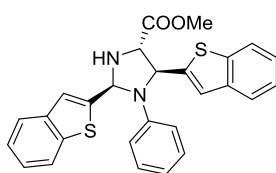

3o

**Methyl (2S,4S,5S)-2,5-bis(benzo[b]thiophen-2-yl)-1-phenylimidazolidine-4-carboxylate (3m):** Procedure A: 56% yield, Pale yellow oil;  $R_f = 0.4$  (petroleum ether/ethyl acetate = 6/1); Dissolved in iPrOH for HPLC; HPLC (Chiralcel IC, hexane/iPrOH = 90/10, flow rate 1.0 mL/min,  $\lambda = 254$  nm) major isomer:  $t_r$  (major) = 18.46 min,  $t_r$  (minor) = 13.45 min, ee = 97%; minor isomer:  $t_r$  (major) = 26.19 min,  $t_r$  (minor) = 16.86 min. dr = 92:8 determined by  $^1\text{H}$  NMR.  $[\alpha]_D^{23} = +78.0$  ( $c = 0.25$ , in tetrahydrofuran).  $^1\text{H}$  NMR (400 MHz,  $\text{CDCl}_3$ )  $\delta$  7.88 – 7.85 (m, 1H), 7.83 – 7.80 (m, 2H), 7.78 – 7.75 (m, 1H), 7.65 – 7.64 (m, 1H), 7.49 – 7.48 (m, 1H), 7.40 – 7.32 (m, 4H), 7.19 – 7.13 (m, 2H), 6.90 – 6.77 (m, 3H), 6.03 (s, 1H), 5.20 (d,  $J = 5.6$  Hz, 1H), 4.26 (s, 1H), 3.83 (s, 3H), 3.36 (s, 1H) ppm;  $^{13}\text{C}\{^1\text{H}\}$  NMR (101 MHz,  $\text{CDCl}_3$ )  $\delta$  171.3, 147.1, 146.5, 146.1, 140.0, 139.8, 139.7, 139.4, 129.1, 124.5, 124.4, 124.34, 124.29, 123.8, 123.5, 122.8, 122.6, 122.6, 121.3, 119.5, 114.4, 77.0, 67.5, 65.9, 52.7 ppm; IR (neat)  $\nu$  ( $\text{cm}^{-1}$ ): 2953,

1738, 1599, 1501, 1458, 1436, 1315, 1211, 1065, 931, 834, 749, 693; HRMS (ESI-FT) calcd for  $\text{C}_{27}\text{H}_{23}\text{N}_2\text{O}_2\text{S}_2^+$  ( $[\text{M}] + \text{H}^+$ ) = 471.1195, found 471.1195.

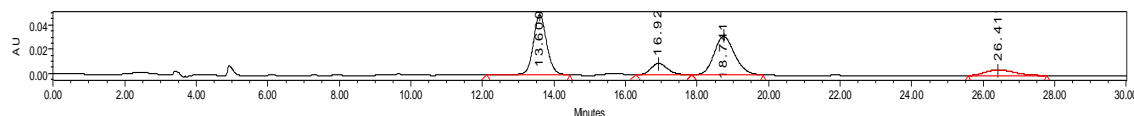

|   | Retention Time | Area    | % Area |
|---|----------------|---------|--------|
| 1 | 13.600         | 1317168 | 40.96  |
| 2 | 16.922         | 326391  | 10.15  |
| 3 | 18.741         | 1290950 | 40.14  |
| 4 | 26.411         | 281495  | 8.75   |

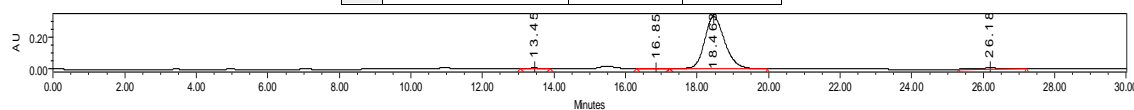

|   | Retention Time | Area     | % Area |
|---|----------------|----------|--------|
| 1 | 13.453         | 207132   | 1.51   |
| 2 | 16.856         | 175573   | 1.28   |
| 3 | 18.463         | 12979622 | 94.45  |
| 4 | 26.189         | 380323   | 2.77   |

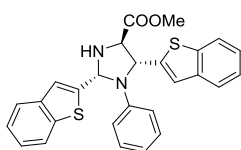

((2R,4R,5R)-3o

**Methyl ((2R,4R,5R)-2,5-bis(benzo[b]thiophen-2-yl)-1-phenylimidazolidine-4-carboxylate ((2R,4R,5R)-3o):** Procedure A: 35% yield, Pale yellow oil;  $R_f = 0.4$  (petroleum ether/ethyl acetate = 6/1); Dissolved in iPrOH for HPLC; HPLC (Chiralcel IC, hexane/iPrOH = 90/10, flow rate 1.0 mL/min,  $\lambda = 254$  nm) major isomer:  $t_r$  (major) = 13.76 min,  $t_r$  (minor) = 19.82 min, ee = -91%; minor isomer:  $t_r$  (major) = 16.52 min,  $t_r$  (minor) = 27.21 min. dr = 95:5 determined by  $^1\text{H}$  NMR.  $[\alpha]_D^{29} = -58.3$  ( $c = 0.29$ , in tetrahydrofuran).  $^1\text{H}$  NMR (400 MHz,  $\text{CDCl}_3$ )  $\delta$  7.88 – 7.84 (m, 1H), 7.83 – 7.79 (m, 2H), 7.77 – 7.74 (m, 1H), 7.64 – 7.62 (m, 1H), 7.49 – 7.47 (m, 1H), 7.44 – 7.32 (m, 4H), 7.18 – 7.13 (m, 2H), 6.86 – 6.78 (m, 3H), 6.03 (s, 1H), 5.20 (d,  $J = 5.6$  Hz, 1H), 4.25 (s, 1H), 3.82 (s, 3H), 3.35 (s, 1H) ppm;  $^{13}\text{C}\{^1\text{H}\}$  NMR (101 MHz,  $\text{CDCl}_3$ )  $\delta$  171.3, 147.1, 146.5, 146.1, 140.0, 139.8, 139.7, 139.4, 129.1, 124.5, 124.41, 124.35, 124.3, 123.8, 123.5, 122.8,

122.61, 122.55, 121.3, 119.5, 114.4, 77.0, 67.5, 65.9, 52.7 ppm.

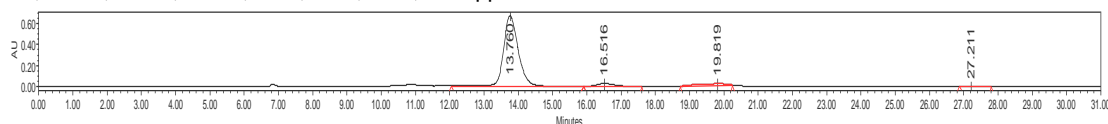

|   | Retention Time | Area     | % Area |
|---|----------------|----------|--------|
| 1 | 13.760         | 20589942 | 91.31  |
| 2 | 16.516         | 1048463  | 4.65   |
| 3 | 19.819         | 870995   | 3.86   |
| 4 | 27.211         | 38898    | 0.17   |

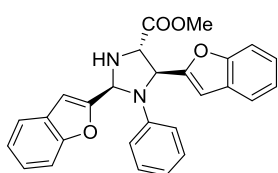

3p

**Methyl (2S,4S,5S)-2,5-di(benzofuran-2-yl)-1-phenylimidazolidine-4-carboxylate (3p): Procedure A:** 56% yield, Pale yellow oil;  $R_f = 0.4$  (petroleum ether/ethyl acetate = 6/1); Dissolved in iPrOH for HPLC; **HPLC** (Chiralcel IC, hexane/iPrOH = 90/10, flow rate 1.0 mL/min,  $\lambda = 254$  nm) major isomer:  $t_r$  (major) = 13.06 min,  $t_r$  (minor) = 11.56 min, ee = 96%; minor isomer:  $t_r$  (major) = 14.91 min,  $t_r$  (minor) = 12.22 min. dr = 90:10 determined by  $^1\text{H NMR}$ .  $[\alpha]_D^{25} = +32.0$  ( $c = 0.48$ , in tetrahydrofuran).  $^1\text{H NMR}$  (400 MHz,  $\text{CDCl}_3$ )  $\delta$  7.61 – 7.48 (m, 4H), 7.36 – 7.29 (m, 2H), 7.26 – 7.22 (m, 2H), 7.21 – 7.15 (m, 2H), 7.08 – 6.93 (m, 2H), 6.91 – 6.48 (m, 4H), 5.96 (d,  $J = 5.6$  Hz, 1H), 5.13 (d,  $J = 4.8$  Hz, 1H), 4.44 – 4.38 (m, 1H), 3.82 (s, 3H), 3.37 (s, 1H) ppm;  $^{13}\text{C}\{^1\text{H}\}$  NMR (101 MHz,  $\text{CDCl}_3$ )  $\delta$  171.2, 156.0, 155.5, 155.3, 155.1, 145.4, 129.2, 128.2, 128.0, 124.6, 124.3, 123.0, 121.3, 121.1, 118.9, 113.6, 111.5, 111.3, 105.8, 105.0, 73.9, 64.7, 62.3, 52.8 ppm; **IR** (neat)  $\nu$  ( $\text{cm}^{-1}$ ): 2954, 1742, 1599, 1502, 1453, 1326, 1253, 1208, 1166, 1065, 812, 750, 692; **HRMS** (ESI-FT) calcd for  $\text{C}_{27}\text{H}_{23}\text{N}_2\text{O}_4^+$  ( $[\text{M}+\text{H}^+]$ ) = 439.1652, found 439.1645.

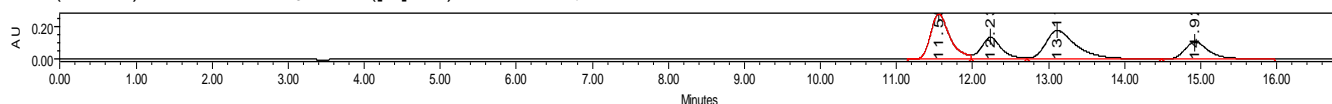

|   | Retention Time | Area    | % Area |
|---|----------------|---------|--------|
| 1 | 11.554         | 4896270 | 32.85  |
| 2 | 12.237         | 2545166 | 17.07  |
| 3 | 13.116         | 5055356 | 33.91  |
| 4 | 14.925         | 2409255 | 16.16  |

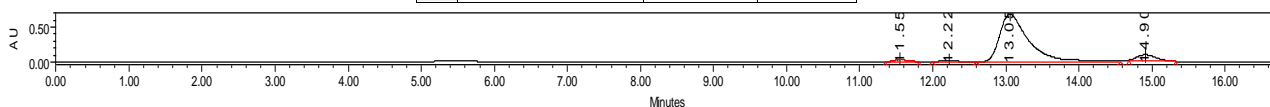

|   | Retention Time | Area     | % Area |
|---|----------------|----------|--------|
| 1 | 11.556         | 413219   | 1.87   |
| 2 | 12.221         | 529674   | 2.39   |
| 3 | 13.055         | 19726805 | 89.05  |
| 4 | 14.909         | 1482964  | 6.69   |

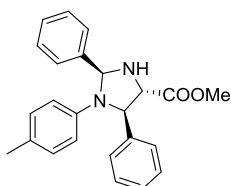

3q

**Methyl (2S,4S,5R)-2,5-diphenyl-1-(p-tolyl)imidazolidine-4-carboxylate (3q): Procedure A:** 41% yield, Colorless oil;  $R_f = 0.4$  (petroleum ether/ethyl acetate = 7/1); Dissolved in iPrOH for HPLC; **HPLC** (Chiralcel IA, hexane/iPrOH = 90/10, flow rate 1.0 mL/min,  $\lambda = 254$  nm) major isomer:  $t_r$  (major) = 8.97 min,  $t_r$  (minor) = 7.52 min, ee = 95%; minor isomer:  $t_r$  (major) = 8.00 min,  $t_r$  (minor) = 11.56 min, dr = 91:9 determined by  $^1\text{H NMR}$ .  $[\alpha]_D^{24} = +42.9$  ( $c = 0.17$ , in tetrahydrofuran).  $^1\text{H NMR}$  (400 MHz,  $\text{CDCl}_3$ )  $\delta$  7.72 – 7.70 (m, 2H), 7.60 – 7.56 (m, 2H), 7.44 – 7.38 (m, 4H), 7.34 – 7.29 (m, 2H), 6.93 – 6.89 (m, 2H), 6.46 – 6.43 (m, 2H), 5.68 (s, 1H), 4.89 (d,  $J = 4.4$  Hz, 1H), 3.96 (d,  $J = 4.4$  Hz, 1H), 3.79 (s, 3H), 2.96 (s, 1H), 2.19 (s, 3H) ppm;  $^{13}\text{C}\{^1\text{H}\}$  NMR (101 MHz,  $\text{CDCl}_3$ )  $\delta$  172.3, 144.8, 142.4, 141.0, 129.4, 128.9, 128.7, 128.4, 128.3, 127.63, 127.60, 127.1, 127.0, 126.3, 114.6, 80.0, 70.0, 67.7, 52.5, 20.2 ppm; **IR** (neat)  $\nu$  ( $\text{cm}^{-1}$ ): 2951, 1741, 1618, 1510, 1452, 1328, 1209, 1143, 1028, 805, 756, 700; **HRMS** (ESI-FT) calcd for  $\text{C}_{24}\text{H}_{25}\text{N}_2\text{O}_2^+$  ( $[\text{M}+\text{H}^+]$ ) = 373.1911, found 373.1911.



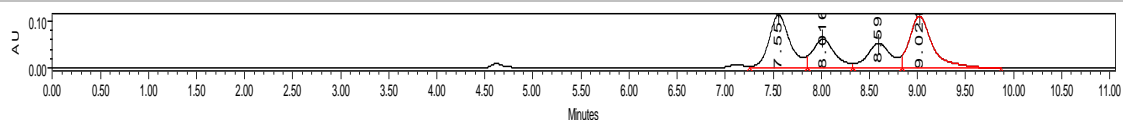

|   | Retention Time | Area    | % Area |
|---|----------------|---------|--------|
| 1 | 7.554          | 1742255 | 32.00  |
| 2 | 8.016          | 972943  | 17.87  |
| 3 | 8.596          | 919034  | 16.88  |
| 4 | 9.021          | 1810454 | 33.25  |

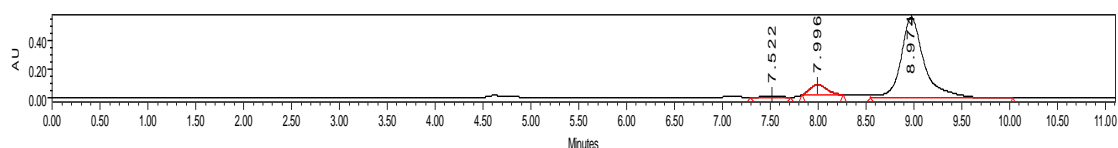

|   | Retention Time | Area    | % Area |
|---|----------------|---------|--------|
| 1 | 7.522          | 260889  | 2.44   |
| 2 | 7.996          | 855914  | 8.02   |
| 3 | 8.974          | 9553861 | 89.53  |

**Procedure B:** 39% yield, Colorless oil;  $R_f = 0.4$  (petroleum ether/ethyl acetate = 7/1); Dissolved in iPrOH for HPLC; **HPLC** (Chiralcel IA, hexane/iPrOH = 90/10, flow rate 1.0 mL/min,  $\lambda = 254$  nm) major isomer:  $t_r$  (major) = 8.96 min,  $t_r$  (minor) = 7.51 min, ee = 93%; minor isomer:  $t_r$  (major) = 7.99 min. dr = 94:6 determined by  $^1\text{H}$  NMR.  $[\alpha]_D^{28} = +37.6$  ( $c = 0.23$ , in tetrahydrofuran).

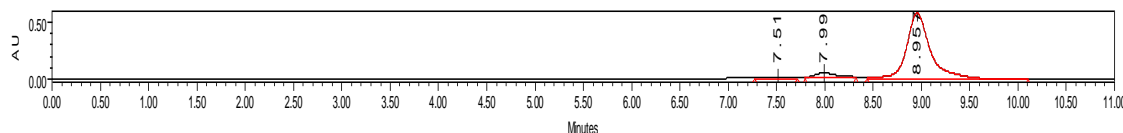

|   | Retention Time | Area     | % Area |
|---|----------------|----------|--------|
| 1 | 7.513          | 393467   | 3.56   |
| 2 | 7.992          | 525864   | 4.76   |
| 3 | 8.957          | 10122621 | 91.67  |

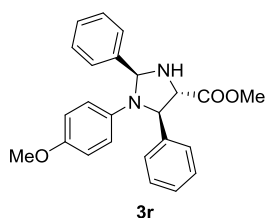

**Methyl (2S,4S,5R)-1-(4-methoxyphenyl)-2,5-diphenylimidazolidine-4-carboxylate (3r): Procedure A:** 35% yield isolated by preparative TLC, Colorless oil;  $R_f = 0.4$  (petroleum ether/ethyl acetate = 3/1); Dissolved in iPrOH for HPLC; **HPLC** (Chiralcel IC, hexane/iPrOH = 90/10, flow rate 1.0 mL/min,  $\lambda = 254$  nm) major isomer:  $t_r$  (major) = 11.50 min,  $t_r$  (minor) = 16.11 min, ee = 95%; minor isomer:  $t_r$  (major) = 23.74 min,  $t_r$  (minor) = 13.26 min. dr = 92:8 determined by  $^1\text{H}$  NMR.  $[\alpha]_D^{24} = +13.7$  ( $c = 0.10$ , in tetrahydrofuran,  $\lambda = 546$  nm).  $^1\text{H}$  NMR (400 MHz,  $d_6$ -Acetone)  $\delta$  7.72 – 7.69 (m, 2H), 7.62 – 7.59 (m, 2H), 7.45 – 7.37 (m, 5H), 7.32 – 7.29 (m, 1H), 6.68 – 6.65 (m, 2H), 6.50 – 6.47 (m, 2H), 5.65 (s, 1H), 4.78 (d,  $J = 5.2$  Hz, 1H), 3.88 (d,  $J = 5.2$  Hz, 1H), 3.73 (s, 3H), 3.63 (s, 3H). ppm;  $^{13}\text{C}\{^1\text{H}\}$  NMR (101 MHz,  $d_6$ -Acetone)  $\delta$  173.3, 153.9, 144.2, 143.4, 142.9, 129.8, 129.6, 129.1, 128.6, 128.5, 127.7, 116.8, 115.3,

81.8, 71.6, 69.1, 55.9, 52.7 ppm; IR (neat)  $\nu$  ( $\text{cm}^{-1}$ ): 2955, 1732, 1641, 1513, 1448, 1346, 1242, 1188, 1065, 928, 847, 762; HRMS (ESI-FT) calcd for  $\text{C}_{24}\text{H}_{25}\text{N}_2\text{O}_3^+$  ( $[\text{M}+\text{H}^+]$ ) = 389.1860, found 389.1859.

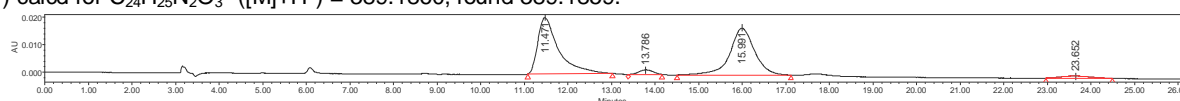

|   | Retention Time | Area   | % Area |
|---|----------------|--------|--------|
| 1 | 11.471         | 681528 | 47.62  |

|   |        |        |       |
|---|--------|--------|-------|
| 2 | 13.786 | 37332  | 2.61  |
| 3 | 15.991 | 676095 | 47.24 |
| 4 | 23.652 | 36190  | 2.53  |

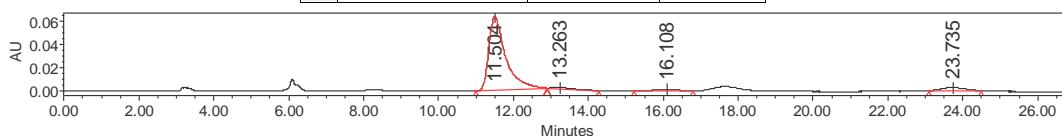

|   | Retention Time | Area    | % Area |
|---|----------------|---------|--------|
| 1 | 11.504         | 1981248 | 89.98  |
| 2 | 13.263         | 36535   | 1.66   |
| 3 | 16.108         | 56501   | 2.57   |
| 4 | 23.735         | 127557  | 5.79   |

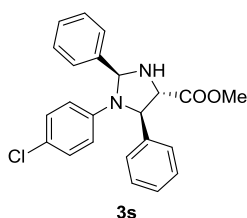

**Methyl (2S,4S,5R)-1-(4-chlorophenyl)-2,5-diphenylimidazolidine-4-carboxylate (3s): Procedure A:** 44% yield, Colorless oil;  $R_f = 0.4$  (petroleum ether/ethyl acetate = 6/1); Dissolved in iPrOH for HPLC; **HPLC** (Chiralcel IC, hexane/iPrOH = 90/10, flow rate 1.0 mL/min,  $\lambda = 254$  nm) major isomer:  $t_r$  (major) = 7.37 min,  $t_r$  (minor) = 10.08 min, ee = 97%; minor isomer:  $t_r$  (major) = 13.14 min,  $t_r$  (minor) = 8.26 min. dr = 90:10 determined by  $^1\text{H NMR}$ .  $[\alpha]_D^{23} = +13.7$  ( $c = 0.21$ , in tetrahydrofuran).  $^1\text{H NMR}$  (400 MHz,  $\text{CDCl}_3$ )  $\delta$  7.70 – 7.66 (m, 2H), 7.55 – 7.52 (m, 2H), 7.44 – 7.40 (m, 4H), 7.35 – 7.31 (m, 2H), 7.04 – 7.01 (m, 2H), 6.46 – 6.43 (m, 2H), 5.67 (s, 1H), 4.88 (d,  $J = 4.8$  Hz, 1H), 3.97 (d,  $J = 4.4$  Hz, 1H), 3.80 (s, 3H), 2.96 (s, 1H) ppm;  $^{13}\text{C}\{^1\text{H}\}$  NMR (101 MHz,  $\text{CDCl}_3$ )  $\delta$  172.1, 145.5, 141.7, 140.3, 129.0, 128.9, 128.7, 128.6, 127.9, 127.0, 126.2, 123.5, 115.6, 80.0, 69.9, 67.7, 52.6 ppm; **IR** (neat)  $\nu$  ( $\text{cm}^{-1}$ ): 2952, 1739, 1598, 1496, 1451, 1333, 1209, 1099, 814, 679; **HRMS** (ESI-FT) calcd for  $\text{C}_{23}\text{H}_{22}^{35}\text{ClN}_2\text{O}_2^+$  ( $[\text{M}+\text{H}]^+$ ) = 393.1364, found 393.1364, calcd for  $\text{C}_{23}\text{H}_{22}^{37}\text{ClN}_2\text{O}_2^+$  ( $[\text{M}+\text{H}]^+$ ) = 395.1335, found 395.1334.

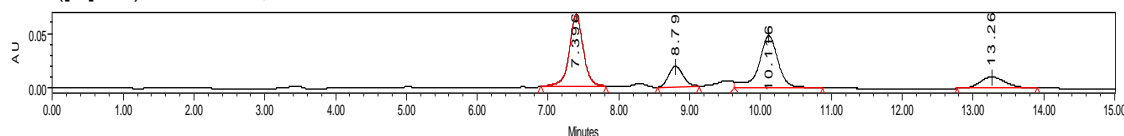

|   | Retention Time | Area   | % Area |
|---|----------------|--------|--------|
| 1 | 7.396          | 900275 | 38.20  |
| 2 | 8.797          | 259447 | 11.01  |
| 3 | 10.116         | 934296 | 39.64  |
| 4 | 13.263         | 262764 | 11.15  |

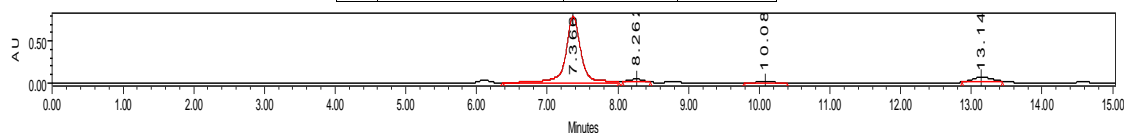

|   | Retention Time | Area     | % Area |
|---|----------------|----------|--------|
| 1 | 7.366          | 12063330 | 88.57  |
| 2 | 8.262          | 384393   | 2.82   |
| 3 | 10.084         | 193259   | 1.42   |
| 4 | 13.140         | 979593   | 7.19   |

**Procedure B:** 44% yield, Colorless oil;  $R_f = 0.4$  (petroleum ether/ethyl acetate = 6/1); Dissolved in iPrOH for HPLC; **HPLC** (Chiralcel IC, hexane/iPrOH = 90/10, flow rate 1.0 mL/min,  $\lambda = 254$  nm) major isomer:  $t_r$  (major) = 7.40 min,  $t_r$  (minor) = 10.16 min, ee = 97%; minor isomer:  $t_r$  (major) = 13.30 min,  $t_r$  (minor) = 8.30 min. dr = 94:6 determined by  $^1\text{H NMR}$ .  $[\alpha]_D^{26} = +14.3$  ( $c = 0.18$ , in tetrahydrofuran).

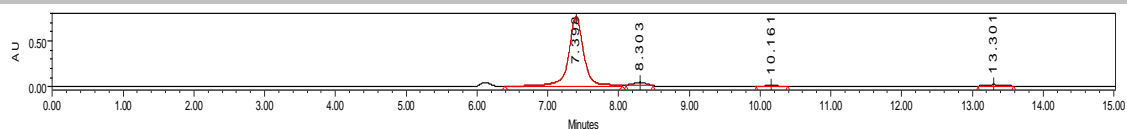

|   | Retention Time | Area     | % Area |
|---|----------------|----------|--------|
| 1 | 7.398          | 11733266 | 93.81  |
| 2 | 8.303          | 381248   | 3.05   |
| 3 | 10.161         | 144656   | 1.16   |
| 4 | 13.301         | 248757   | 1.99   |

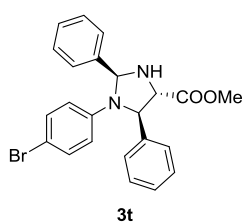

**Methyl (2S,4S,5R)-1-(4-bromophenyl)-2,5-diphenylimidazolidine-4-carboxylate (3t): Procedure A:** 46% yield, Colorless oil;  $R_f = 0.4$  (petroleum ether/ethyl acetate = 6/1); Dissolved in iPrOH for HPLC; **HPLC** (Chiralcel IC, hexane/iPrOH = 90/10, flow rate 1.0 mL/min,  $\lambda = 254$  nm) major isomer:  $t_r$  (major) = 7.25 min,  $t_r$  (minor) = 10.15 min, ee = 97%; minor isomer:  $t_r$  (major) = 8.15 min,  $t_r$  (minor) = 12.53 min. dr = 94:6 determined by  $^1\text{H NMR}$ .  $[\alpha]_D^{27} = +38.6$  ( $c = 0.18$ , in tetrahydrofuran).  $^1\text{H NMR}$  (400 MHz,  $\text{CDCl}_3$ )  $\delta$  7.69 – 7.65 (m, 2H), 7.55 – 7.51 (m, 2H), 7.45 – 7.39 (m, 4H), 7.36 – 7.31 (m, 2H), 7.18 – 7.15 (m, 2H), 6.41 – 6.37 (m, 2H), 5.66 (s, 1H), 4.87 (d,  $J = 4.8$  Hz, 1H), 3.96 (d,  $J = 4.4$  Hz, 1H), 3.80 (s, 3H), 2.96 (s, 1H) ppm;  $^{13}\text{C}\{^1\text{H}\}$  NMR (101 MHz,  $\text{CDCl}_3$ )  $\delta$  172.1, 145.9, 141.6, 140.2, 131.6, 129.0, 128.9, 128.6, 127.9, 127.0, 126.2, 116.1, 110.7, 79.9, 69.8, 67.7, 52.6 ppm; **IR** (neat)  $\nu$  ( $\text{cm}^{-1}$ ): 2952, 1739, 1592, 1493, 1452, 1333,

1210, 1074, 811, 759, 700; **HRMS** (ESI-FT) calcd for  $\text{C}_{23}\text{H}_{22}^{79}\text{Br N}_2\text{O}_2^+$  ( $[\text{M}+\text{H}]^+$ ) = 437.0859, found 437.0860, calcd for  $\text{C}_{23}\text{H}_{22}^{81}\text{Br N}_2\text{O}_2^+$  ( $[\text{M}+\text{H}]^+$ ) = 439.0839, found 439.0839.

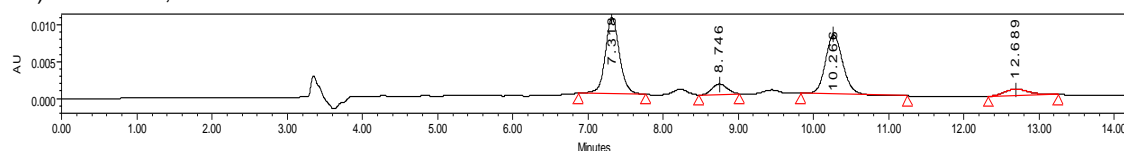

|   | Retention Time | Area   | % Area |
|---|----------------|--------|--------|
| 1 | 7.318          | 136774 | 44.58  |
| 2 | 8.746          | 19641  | 6.40   |
| 3 | 10.266         | 129826 | 42.31  |
| 4 | 12.689         | 20578  | 6.71   |

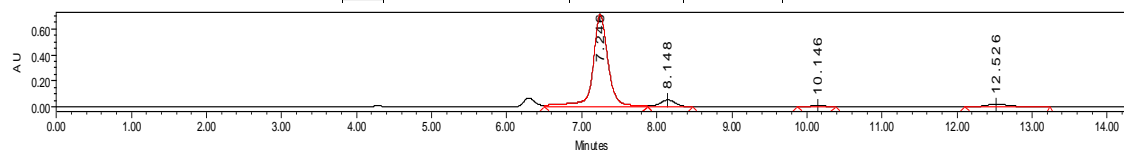

|   | Retention Time | Area     | % Area |
|---|----------------|----------|--------|
| 1 | 7.246          | 10234865 | 89.59  |
| 2 | 8.148          | 779289   | 6.82   |
| 3 | 10.146         | 181145   | 1.59   |
| 4 | 12.526         | 228548   | 2.00   |

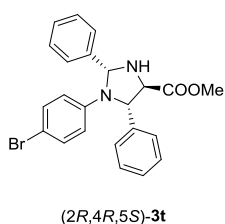

**Methyl (2R,4R,5S)-1-(4-bromophenyl)-2,5-diphenylimidazolidine-4-carboxylate [(2R,4R,5S)-3t]: Procedure A:** 36% yield, Colorless oil;  $R_f = 0.4$  (petroleum ether/ethyl acetate = 6/1); Dissolved in iPrOH for HPLC; **HPLC** (Chiralcel IC, hexane/iPrOH = 90/10, flow rate 1.0 mL/min,  $\lambda = 254$  nm) major isomer:  $t_r$  (major) = 10.55 min,  $t_r$  (minor) = 7.26 min, ee = -91%; minor isomer:  $t_r$  (major) = 8.60 min,  $t_r$  (minor) = 13.10 min. dr = 88:12 determined by  $^1\text{H NMR}$ .  $[\alpha]_D^{29} = -28.6$  ( $c = 0.28$ , in tetrahydrofuran).  $^1\text{H NMR}$  (400 MHz,  $\text{CDCl}_3$ )  $\delta$  7.69 – 7.63 (m, 2H), 7.57 – 7.47 (m, 2H), 7.45 – 7.38 (m, 4H), 7.36 – 7.31 (m, 2H), 7.18 – 7.15 (m, 2H), 6.41 – 6.36 (m, 2H), 5.66 (s, 1H), 4.87 (d,  $J = 4.0$  Hz, 1H), 3.97 (d,  $J = 4.4$  Hz, 1H), 3.80 (s, 3H), 2.96 (s, 1H) ppm;  $^{13}\text{C}\{^1\text{H}\}$  NMR (101 MHz,  $\text{CDCl}_3$ )  $\delta$  172.1, 145.9, 141.6, 140.2, 131.6, 129.0, 128.9, 128.6, 127.9, 127.0, 126.2, 116.1, 110.7, 79.9, 69.8, 67.7, 52.6 ppm.

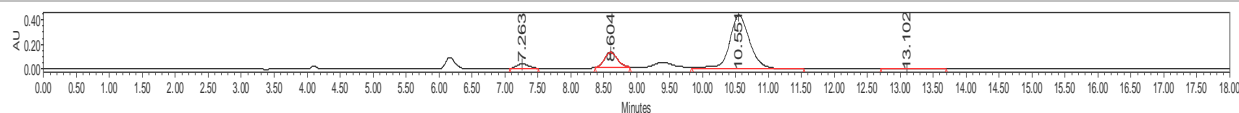

|   | Retention Time | Area    | % Area |
|---|----------------|---------|--------|
| 1 | 7.263          | 436201  | 3.79   |
| 2 | 8.604          | 1641641 | 14.26  |
| 3 | 10.551         | 9339474 | 81.11  |
| 4 | 13.102         | 97066   | 0.84   |

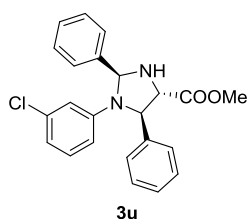

**Methyl (2S,4S,5R)-1-(3-chlorophenyl)-2,5-diphenylimidazolidine-4-carboxylate (3u): Procedure A:** 35% yield, Colorless oil;  $R_f = 0.4$  (petroleum ether/ethyl acetate = 6/1); Dissolved in iPrOH for HPLC; **HPLC** (Chiralcel IC, hexane/iPrOH = 90/10, flow rate 1.0 mL/min,  $\lambda = 254$  nm) major isomer:  $t_r$  (major) = 7.45 min,  $t_r$  (minor) = 8.49 min, ee = 87%; minor isomer:  $t_r$  (major) = 11.91 min,  $t_r$  (minor) = 7.89 min. dr = 92:8 determined by  $^1\text{H NMR}$ .  $[\alpha]_D^{23} = +13.2$  ( $c = 0.18$ , in tetrahydrofuran).  $^1\text{H NMR}$  (400 MHz,  $\text{CDCl}_3$ )  $\delta$  7.70 – 7.66 (m, 2H), 7.56 – 7.51 (m, 2H), 7.47 – 7.40 (m, 4H), 7.36 – 7.30 (m, 2H), 7.02 – 6.97 (m, 1H), 6.73 – 6.70 (m, 1H), 6.53 – 6.51 (m, 1H), 6.43 – 6.36 (m, 1H), 5.70 (s, 1H), 4.89 (d,  $J = 4.4$  Hz, 1H), 3.97 (d,  $J = 4.4$  Hz, 1H), 3.80 (s, 3H), 2.98 (s, 1H) ppm;  $^{13}\text{C}\{^1\text{H}\}$  NMR (101 MHz,  $\text{CDCl}_3$ )  $\delta$  172.0, 148.1, 141.4, 140.2, 134.6, 129.8, 129.0, 128.9, 128.8, 128.6, 127.9, 127.0, 126.3, 118.4, 114.4, 112.6, 79.9, 69.7, 67.7, 52.6 ppm; **IR** (neat)  $\nu$  ( $\text{cm}^{-1}$ ): 2952, 1739, 1563, 1505, 1485, 1452, 1337, 1210, 1097, 1009, 762, 700;

**HRMS** (ESI-FT) calcd for  $\text{C}_{23}\text{H}_{22}^{35}\text{ClN}_2\text{O}_2^+$  ( $[\text{M}+\text{H}^+]$ ) = 393.1364, found 393.1364, calcd for  $\text{C}_{23}\text{H}_{22}^{37}\text{ClN}_2\text{O}_2^+$  ( $[\text{M}+\text{H}^+]$ ) = 395.1335, found 395.1335.

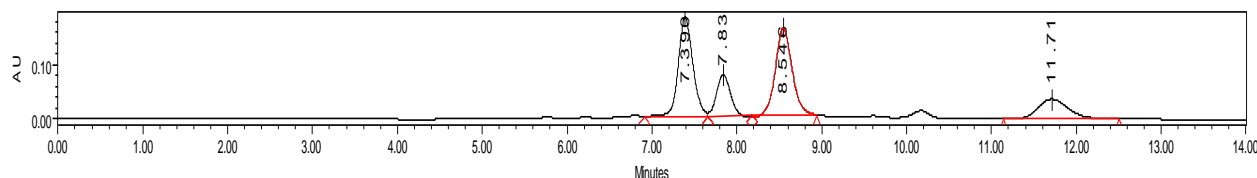

|   | Retention Time | Area    | % Area |
|---|----------------|---------|--------|
| 1 | 7.390          | 2217938 | 35.61  |
| 2 | 7.839          | 879219  | 14.12  |
| 3 | 8.546          | 2207103 | 35.44  |
| 4 | 11.710         | 923456  | 14.83  |

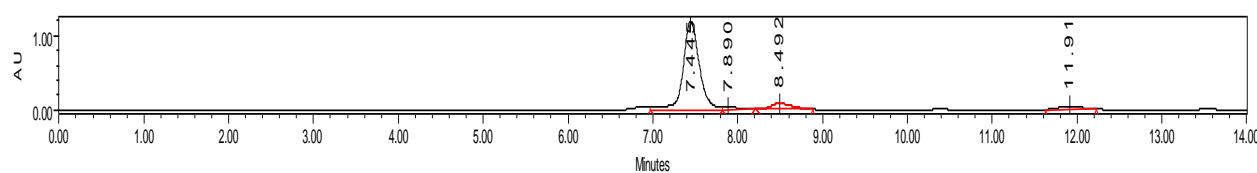

|   | Retention Time | Area     | % Area |
|---|----------------|----------|--------|
| 1 | 7.445          | 15749017 | 85.46  |
| 2 | 7.890          | 461393   | 2.50   |
| 3 | 8.492          | 1427259  | 7.75   |
| 4 | 11.910         | 790344   | 4.29   |

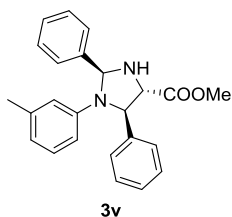

**Methyl (2S,4S,5R)-2,5-diphenyl-1-(*m*-tolyl)imidazolidine-4-carboxylate (3v): Procedure B:** 41% yield, Colorless oil;  $R_f = 0.4$  (petroleum ether/ethyl acetate = 7/1); Dissolved in *i*PrOH for HPLC; HPLC (Chiralcel IH, hexane/*i*PrOH = 90/10, flow rate 1.0 mL/min,  $\lambda = 254$  nm) major isomer:  $t_r$  (major) = 9.46 min,  $t_r$  (minor) = 15.21 min, ee = 98%; minor isomer:  $t_r$  (major) = 11.13 min,  $t_r$  (minor) = 8.05 min. dr = 92:8 determined by  $^1\text{H NMR}$ .  $[\alpha]_D^{28} = +32.1$  ( $c = 0.21$ , in tetrahydrofuran).  $^1\text{H NMR}$  (400 MHz,  $\text{CDCl}_3$ )  $\delta$  7.73 – 7.69 (m, 2H), 7.58 – 7.54 (m, 2H), 7.44 – 7.37 (m, 4H), 7.34 – 7.29 (m, 2H), 7.01 – 6.97 (m, 1H), 6.60 – 6.57 (m, 1H), 6.38 – 6.33 (m, 2H), 5.72 (s, 1H), 4.91 (d,  $J = 4.8$  Hz, 1H), 3.95 (d,  $J = 4.4$  Hz, 1H), 3.79 (s, 3H), 2.98 (s, 1H), 2.17 (s, 3H) ppm;  $^{13}\text{C}\{^1\text{H}\}$  NMR (101 MHz,  $\text{CDCl}_3$ )  $\delta$  172.2, 147.1, 142.1, 140.9, 138.6, 128.9, 128.7, 128.7, 128.3, 127.6, 127.1, 126.3, 119.3, 115.1, 111.6, 79.9, 69.8, 67.7, 52.5, 21.8 ppm; IR (neat)  $\nu$  ( $\text{cm}^{-1}$ ): 3029, 2925, 1739, 1604, 1582, 1494, 1452, 1335, 1210, 1134, 1027, 769, 699; HRMS (ESI-FT) calcd for  $\text{C}_{24}\text{H}_{25}\text{N}_2\text{O}_2^+$  ( $[\text{M}+\text{H}]^+$ ) = 373.1911, found 373.1907.

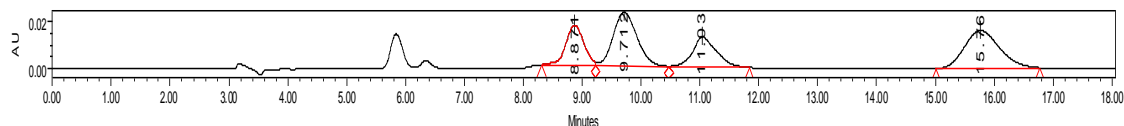

|   | Retention Time | Area   | % Area |
|---|----------------|--------|--------|
| 1 | 8.871          | 357032 | 17.92  |
| 2 | 9.712          | 630025 | 31.63  |
| 3 | 11.036         | 350000 | 17.57  |
| 4 | 15.767         | 654993 | 32.88  |

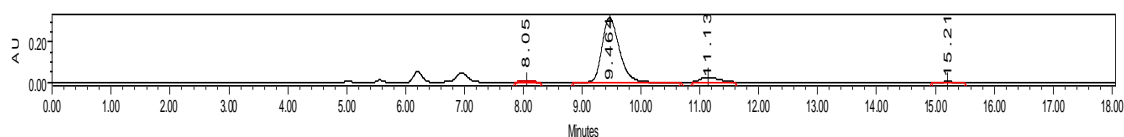

|   | Retention Time | Area    | % Area |
|---|----------------|---------|--------|
| 1 | 8.051          | 81948   | 1.14   |
| 2 | 9.464          | 6555020 | 91.34  |
| 3 | 11.134         | 490773  | 6.84   |
| 4 | 15.212         | 48695   | 0.68   |

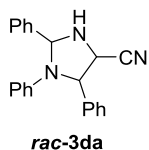

**1,2,5-Triphenylimidazolidine-4-carbonitrile (3da): Procedure A:** 10% yield, White solid; m.p.: 137.3 – 142.5 °C;  $R_f = 0.7$  (petroleum ether/ethyl acetate = 7/1);  $^1\text{H NMR}$  (400 MHz,  $\text{CDCl}_3$ )  $\delta$  7.76 – 7.65 (m, 2H), 7.60 – 7.57 (m, 2H), 7.51 – 7.32 (m, 6H), 7.15 – 7.10 (m, 2H), 6.83 – 6.78 (m, 1H), 6.55 – 6.51 (m, 2H), 5.76 (d,  $J = 8.8$  Hz, 1H), 5.06 (d,  $J = 3.6$  Hz, 1H), 4.15 (dd,  $J = 7.6, 3.6$  Hz, 1H), 2.78 (t,  $J = 8.4$  Hz, 1H) ppm;  $^{13}\text{C}\{^1\text{H}\}$  NMR (101 MHz,  $\text{CDCl}_3$ )  $\delta$  146.3, 140.4, 139.1, 129.3, 129.0, 128.9, 128.8, 128.5, 127.5, 127.0, 126.1, 119.3, 118.5, 114.9, 79.5, 70.8, 55.8 ppm; IR (neat)  $\nu$  ( $\text{cm}^{-1}$ ): 3032, 2923, 1600, 1499, 1453, 1320, 1030, 961, 752, 697; HRMS (ESI-FT) calcd for  $\text{C}_{22}\text{H}_{20}\text{N}_3^+$  ( $[\text{M}+\text{H}]^+$ ) = 326.1652, found 326.1652.

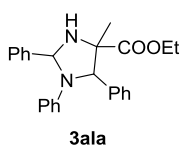

**Ethyl 4-methyl-1,2,5-triphenylimidazolidine-4-carboxylate (3ala): Procedure A:** 13% yield, Colorless oil;  $R_f = 0.6$  (petroleum ether/ethyl acetate = 7/1); dr > 95:5 determined by  $^1\text{H NMR}$ .  $^1\text{H NMR}$  (400 MHz,  $\text{CDCl}_3$ )  $\delta$  7.68 – 7.64 (m, 2H), 7.50 – 7.39 (m, 5H), 7.35 – 7.27 (m, 3H), 7.10 – 7.05 (m, 2H), 6.75 – 6.70 (t,  $J = 7.3$  Hz, 1H), 6.50 – 6.45 (m, 2H), 5.59 (s, 1H), 4.65 (s, 1H), 3.73 – 3.65 (m, 1H), 3.55 – 3.50 (m, 1H), 1.66 (s, 3H), 0.91 (t,  $J = 7.2$  Hz, 3H) ppm;  $^{13}\text{C}\{^1\text{H}\}$  NMR (101 MHz,  $\text{CDCl}_3$ )  $\delta$  171.1, 147.0, 141.1, 138.9, 128.83, 128.78, 128.4, 128.3, 127.9, 127.4, 127.1, 118.3, 114.6, 76.6, 70.3, 61.3, 23.9, 13.6 ppm; IR (neat)  $\nu$  ( $\text{cm}^{-1}$ ): 2922, 1735, 1599, 1499, 1453, 1261, 1153, 1025, 737, 699; HRMS (ESI-FT) calcd for  $\text{C}_{25}\text{H}_{27}\text{N}_2\text{O}_2^+$  ( $[\text{M}+\text{H}]^+$ ) = 387.2067, found 387.2071.

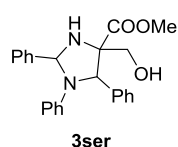

**Methyl 4-(hydroxymethyl)-1,2,5-triphenylimidazolidine-4-carboxylate (3ser): Procedure A:** 13% yield, Colorless oil;  $R_f = 0.3$  (petroleum ether/ethyl acetate = 2/1); dr = 86:14 determined by  $^1\text{H NMR}$ .  $^1\text{H NMR}$  (400 MHz,  $\text{CDCl}_3$ )  $\delta$  7.69 – 7.53 (m, 2H), 7.49 – 7.42 (m, 2H), 7.40 – 7.33 (m, 2H), 7.32 – 7.24 (m, 4H), 7.02 – 6.98 (m, 2H), 6.67 – 6.65 (m, 1H), 6.41 – 6.36 (m, 2H), 5.63 (s, 1H), 4.91 (s, 1H), 3.79 (s, 3H), 3.21 (d,  $J = 11.4$ , 1H), 3.04 (d,  $J = 11.8$  Hz, 1H), 1.81 (s, 1H) ppm;  $^{13}\text{C}\{^1\text{H}\}$  NMR (101 MHz,  $\text{CDCl}_3$ )  $\delta$  173.6, 146.8, 141.6, 138.3, 128.84, 128.81, 128.2, 127.4, 126.7, 118.6, 114.6, 78.3, 72.7, 71.2, 63.7, 53.1 ppm; IR (neat)  $\nu$  ( $\text{cm}^{-1}$ ): 3332, 2921, 1736, 1600, 1500, 1453, 1327, 1217, 1073, 1034, 752, 699; HRMS (ESI-FT) calcd for  $\text{C}_{24}\text{H}_{24}\text{N}_2\text{O}_3^+$  ( $[\text{M}+\text{H}]^+$ ) = 389.1860, found 389.1851.

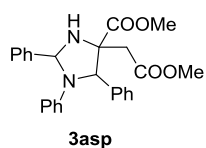

**Methyl 4-(2-methoxy-2-oxoethyl)-1,2,5-triphenylimidazolidine-4-carboxylate (3a1a): Procedure A:** 11% yield, Colorless oil;  $R_f = 0.6$  (petroleum ether/ethyl acetate = 7/1); dr = 94:6 determined by  $^1\text{H NMR}$ .  **$^1\text{H NMR}$  (400 MHz,  $\text{CDCl}_3$ )**  $\delta$  7.58 – 7.55 (m, 2H), 7.41 – 7.38 (m, 2H), 7.35 – 7.30 (m, 3H), 7.27 – 7.21 (m, 3H), 7.03 – 6.98 (m, 2H), 6.69 – 6.65 (m, 1H), 6.43 – 6.40 (m, 2H), 5.53 (s, 1H), 4.60 (s, 1H), 3.63 (s, 3H), 3.24 (d,  $J = 15.6$  Hz, 1H), 3.15 (s, 3H), 2.84 (d,  $J = 15.6$  Hz, 1H) ppm;  **$^{13}\text{C}\{^1\text{H}\}$  NMR (101 MHz,  $\text{CDCl}_3$ )**  $\delta$  170.1, 128.84, 128.75, 128.5, 128.3, 128.1, 127.5, 127.2, 118.7, 114.8, 77.9, 75.0, 71.8, 52.1, 51.9, 41.1 ppm; **IR (neat)  $\nu$  ( $\text{cm}^{-1}$ ):** 2918, 1742, 1599, 1439, 1261, 1202, 752, 698; **HRMS (ESI-FT)** calcd for  $\text{C}_{26}\text{H}_{27}\text{N}_2\text{O}_4^+$  ( $[\text{M}] + \text{H}^+$ ) = 431.1965, found 431.1964.

## (N) Copies of NMR Spectra

$^1\text{H}$  NMR and  $^{13}\text{C}\{^1\text{H}\}$  NMR spectra of compound **L-Ra(OiBu)<sub>2</sub>** in  $\text{CDCl}_3$

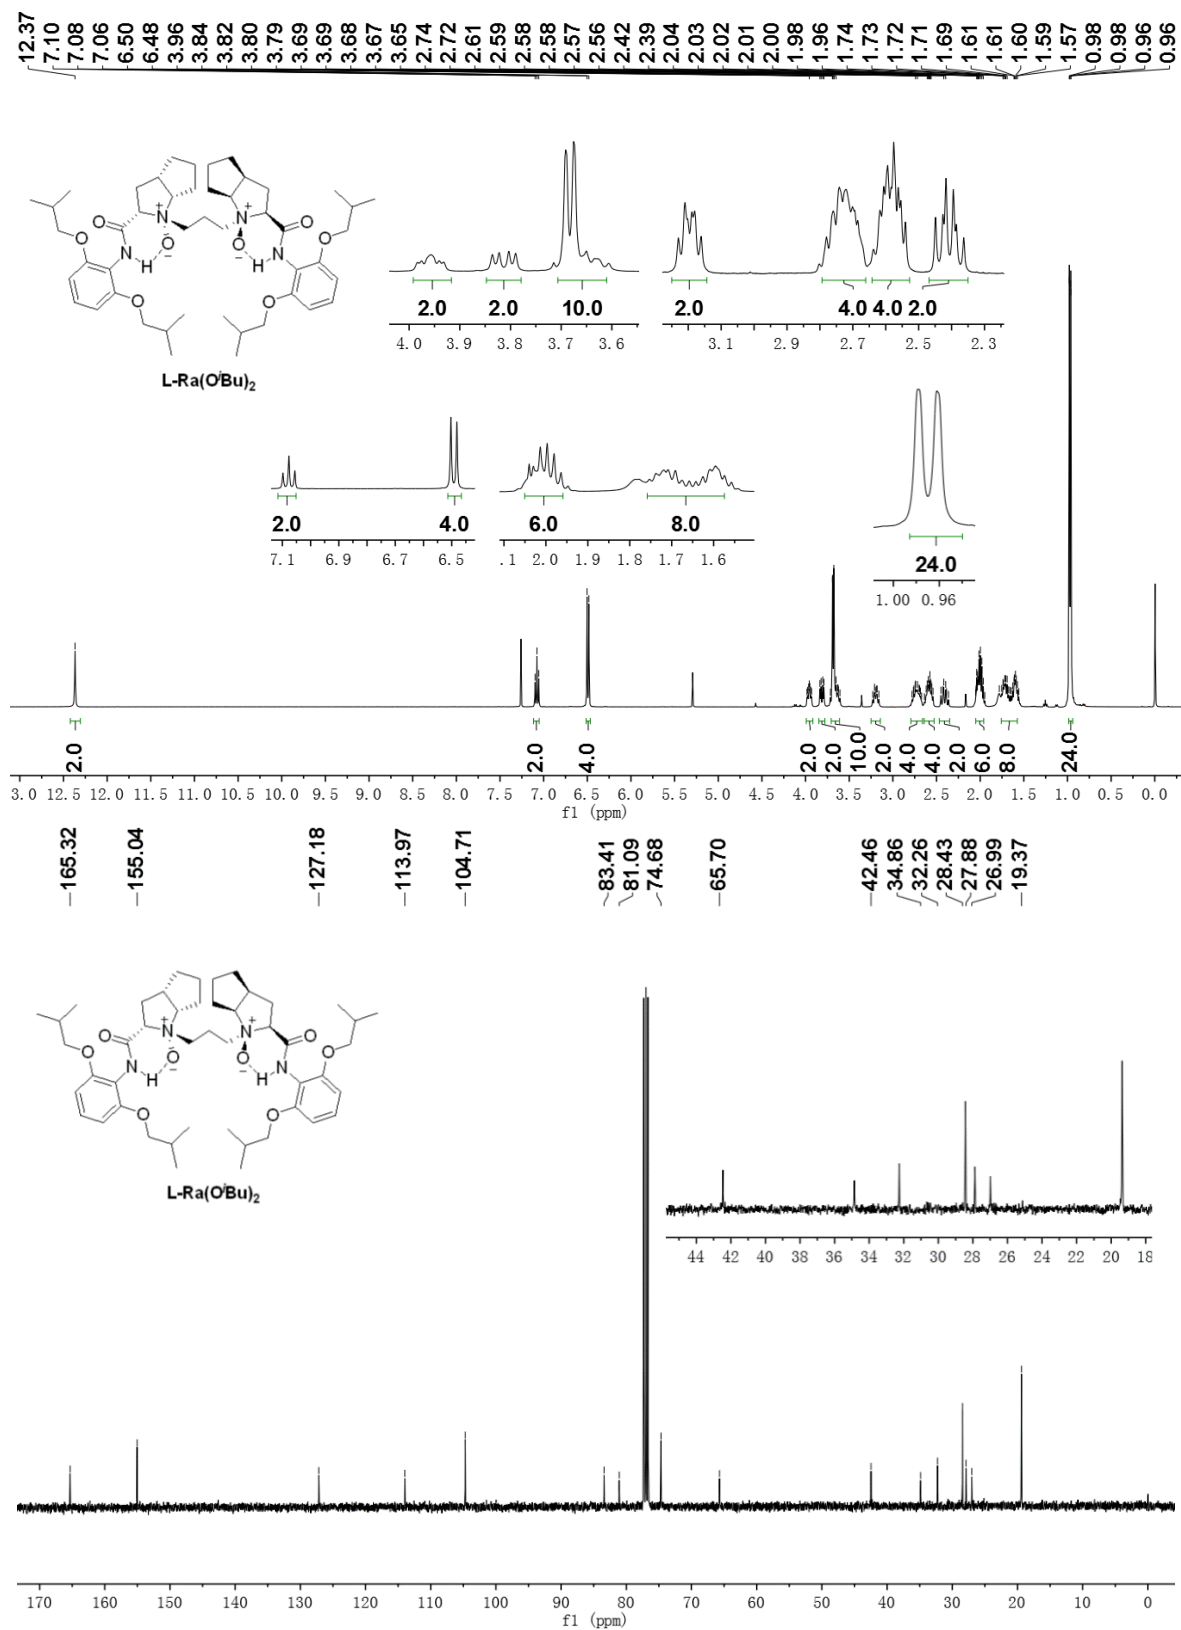

$^1\text{H}$  NMR and  $^{13}\text{C}\{^1\text{H}\}$  NMR spectra of compound **L-Pe(O<sup>i</sup>Bu)<sub>2</sub>** in  $\text{CDCl}_3$

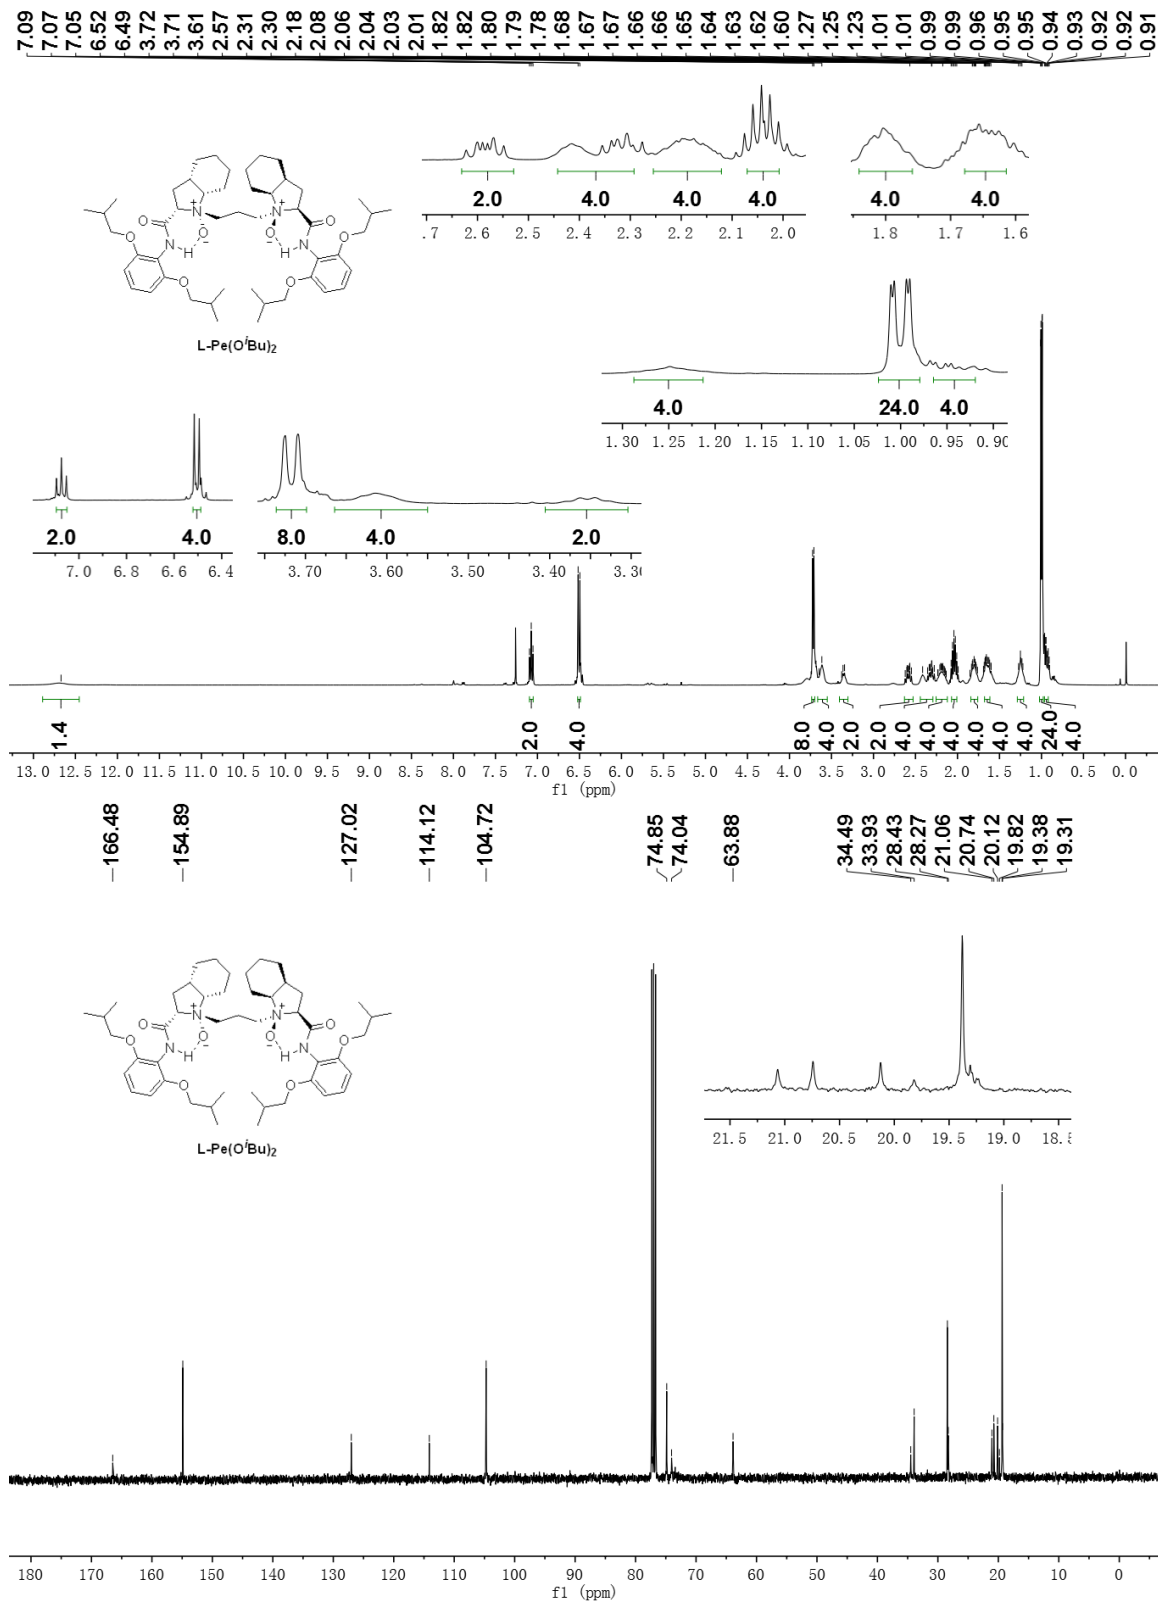



$^1\text{H}$  NMR and  $^{13}\text{C}\{^1\text{H}\}$  NMR spectra of compound of **6a** in  $\text{CDCl}_3$

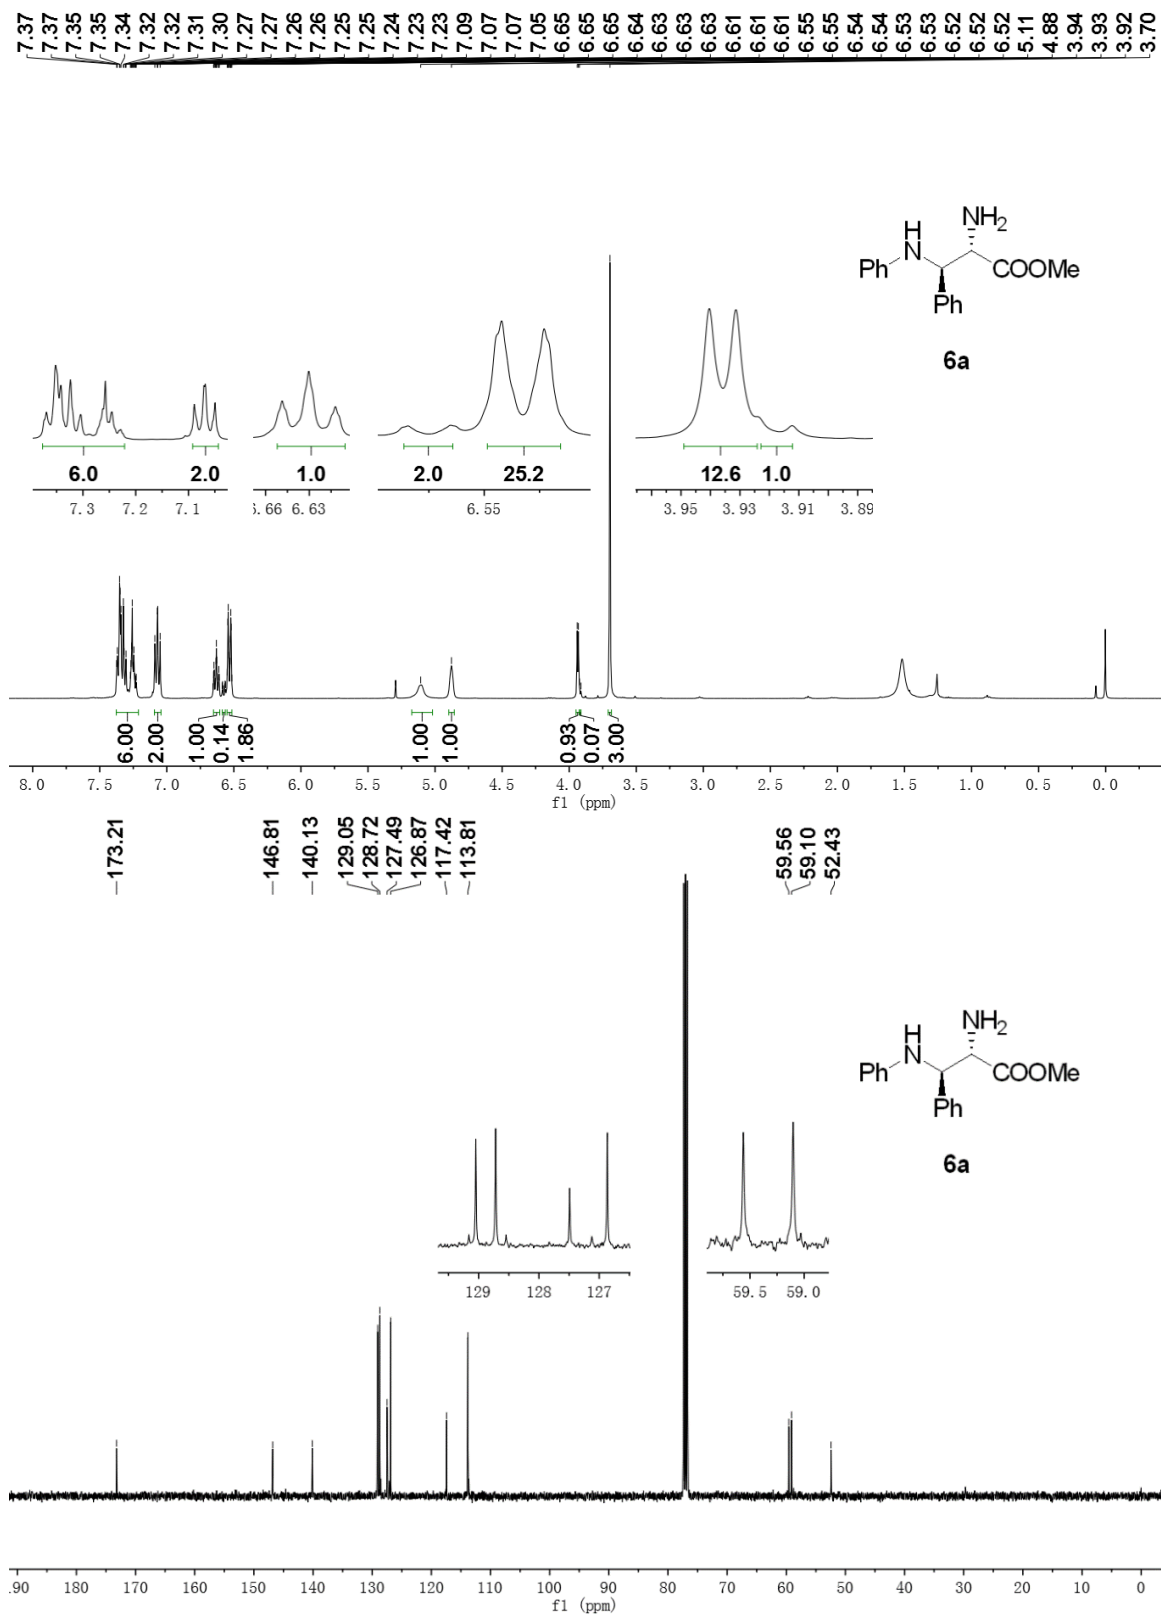

$^1\text{H}$  NMR and  $^{13}\text{C}\{^1\text{H}\}$  NMR spectra of compound of **6b** in  $\text{CDCl}_3$

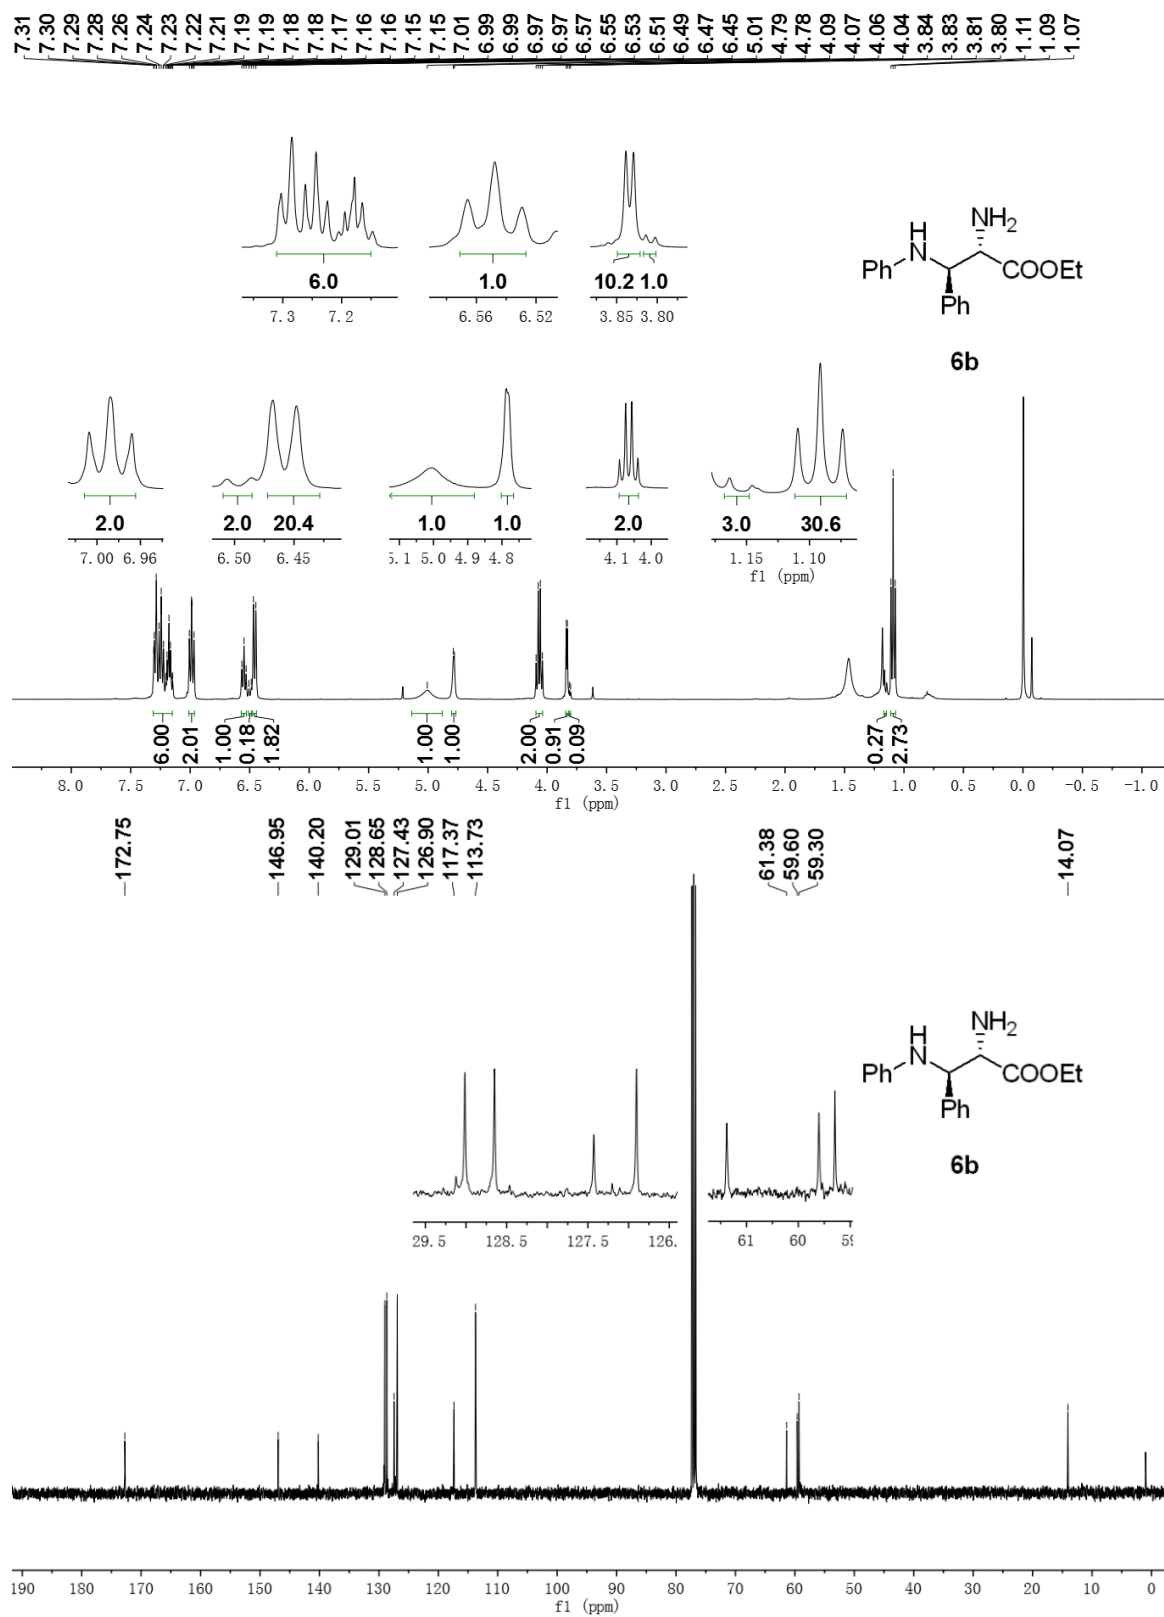

$^1\text{H}$  NMR and  $^{13}\text{C}\{^1\text{H}\}$  NMR spectra of compound of (2*R*,3*S*)-6b in  $\text{CDCl}_3$

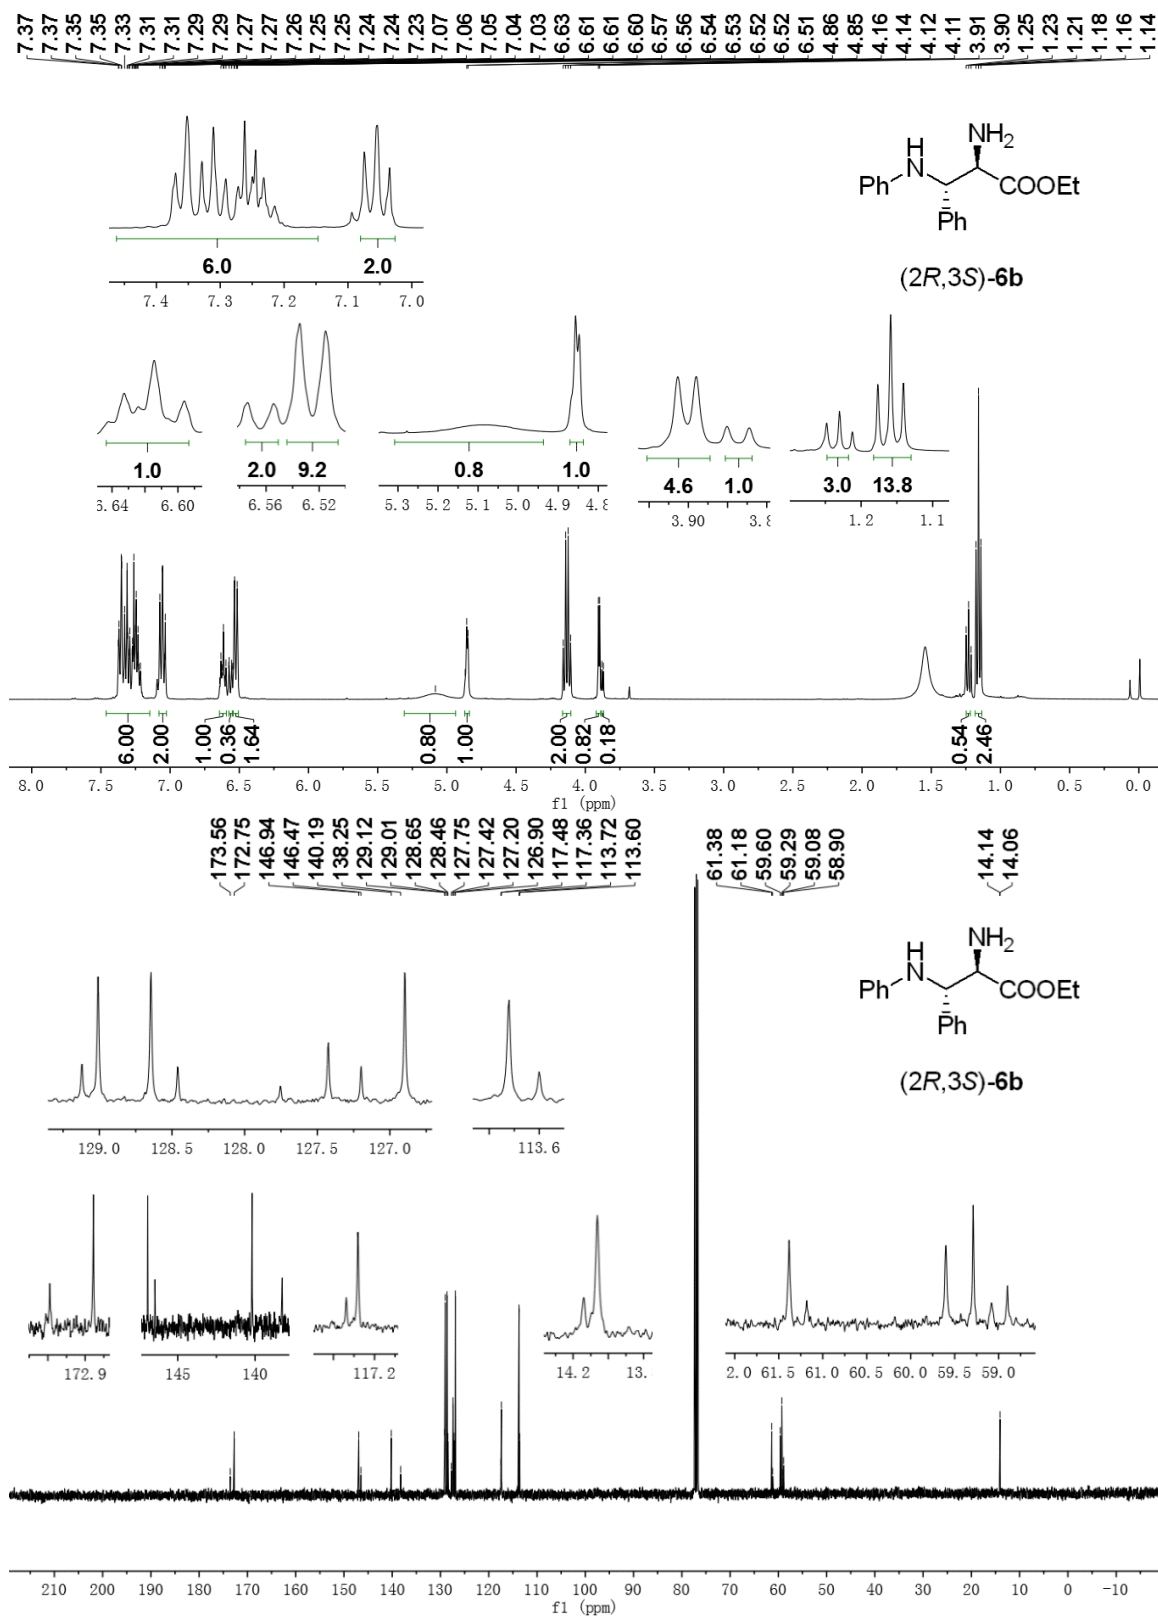

$^1\text{H}$  NMR and  $^{13}\text{C}\{^1\text{H}\}$  NMR spectra of compound of **6c** in  $\text{CDCl}_3$

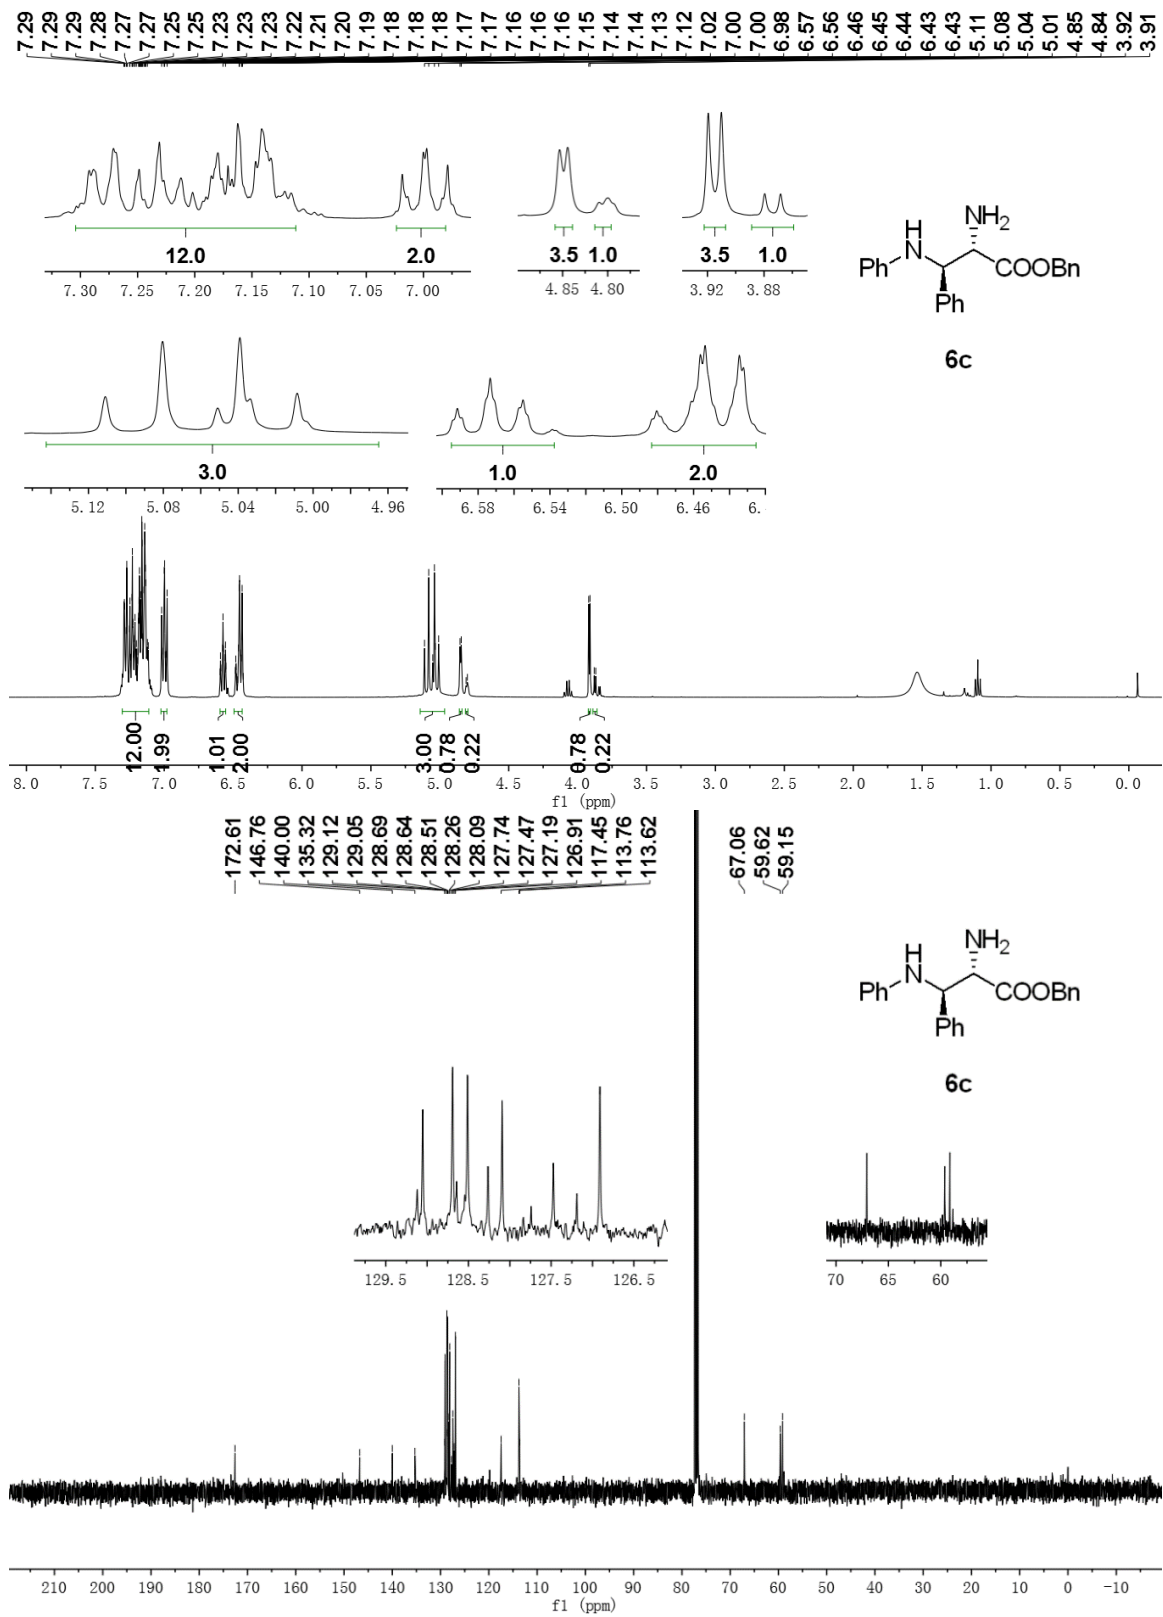

$^1\text{H}$  NMR and  $^{13}\text{C}\{^1\text{H}\}$  NMR spectra of compound of **7a** in  $\text{CDCl}_3$

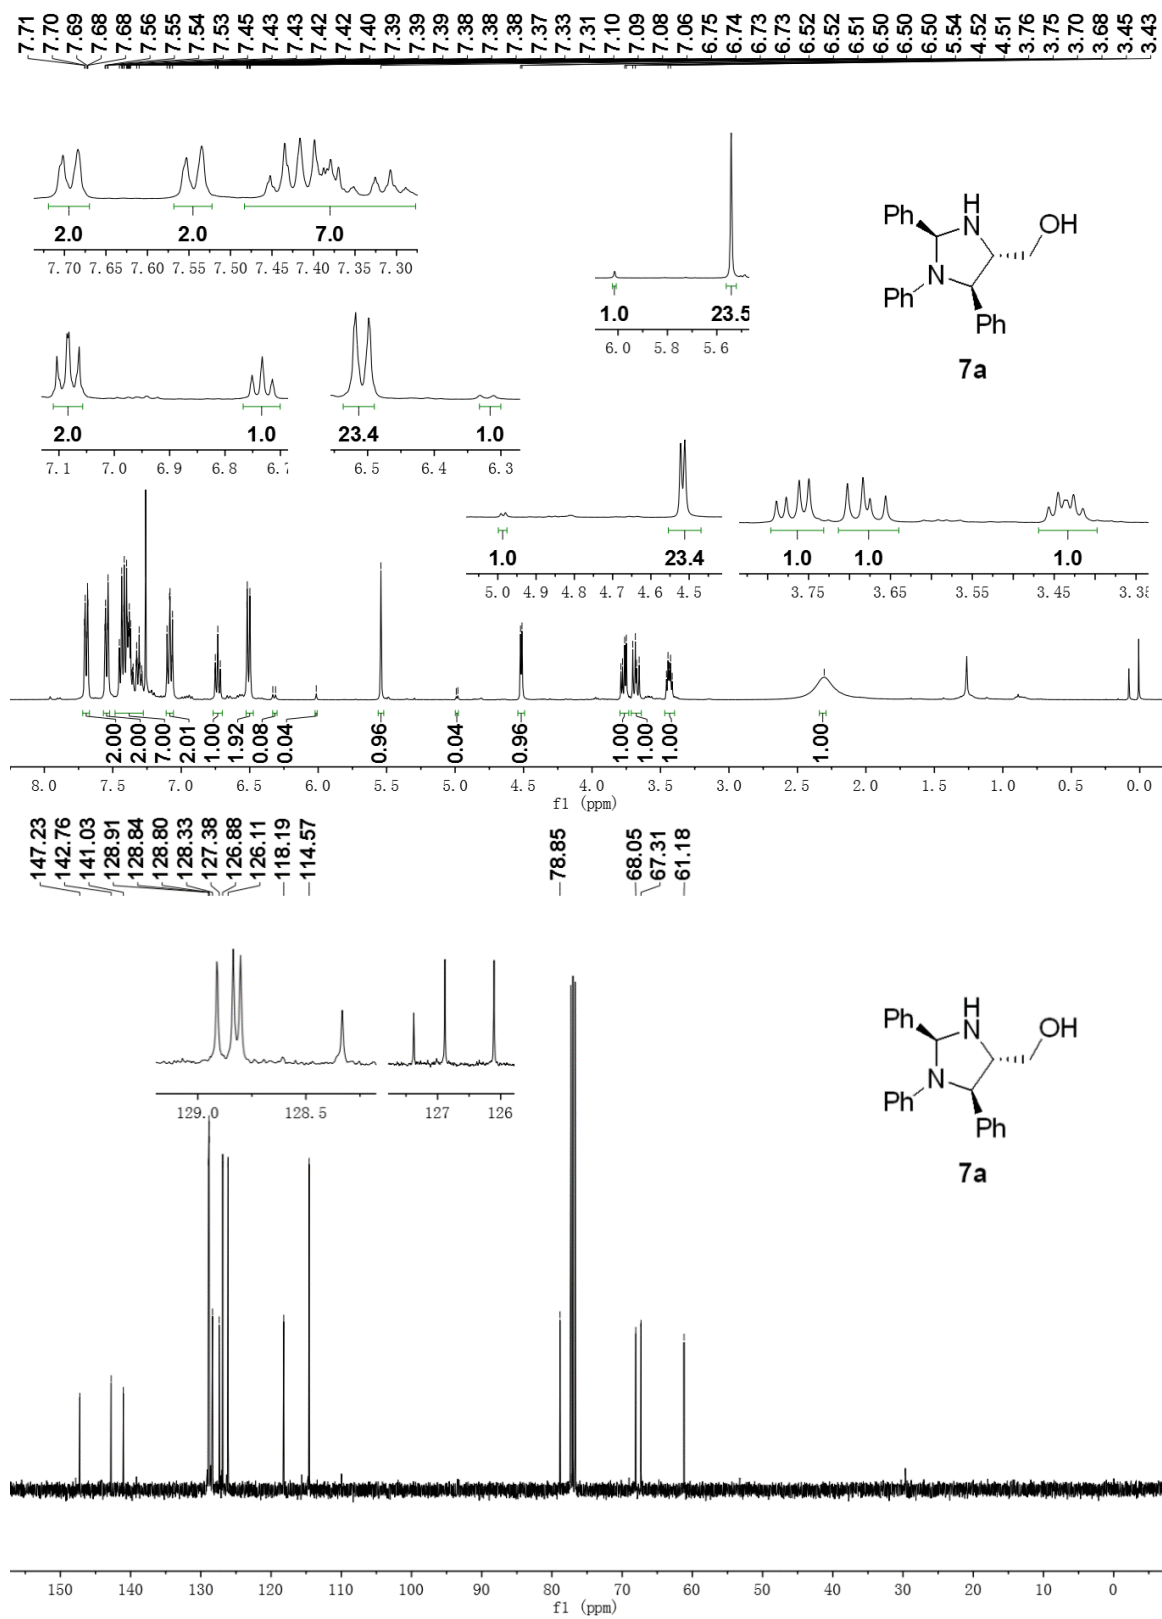

$^1\text{H}$  NMR and  $^{13}\text{C}\{^1\text{H}\}$  NMR spectra of compound of **8a** in  $\text{CDCl}_3$

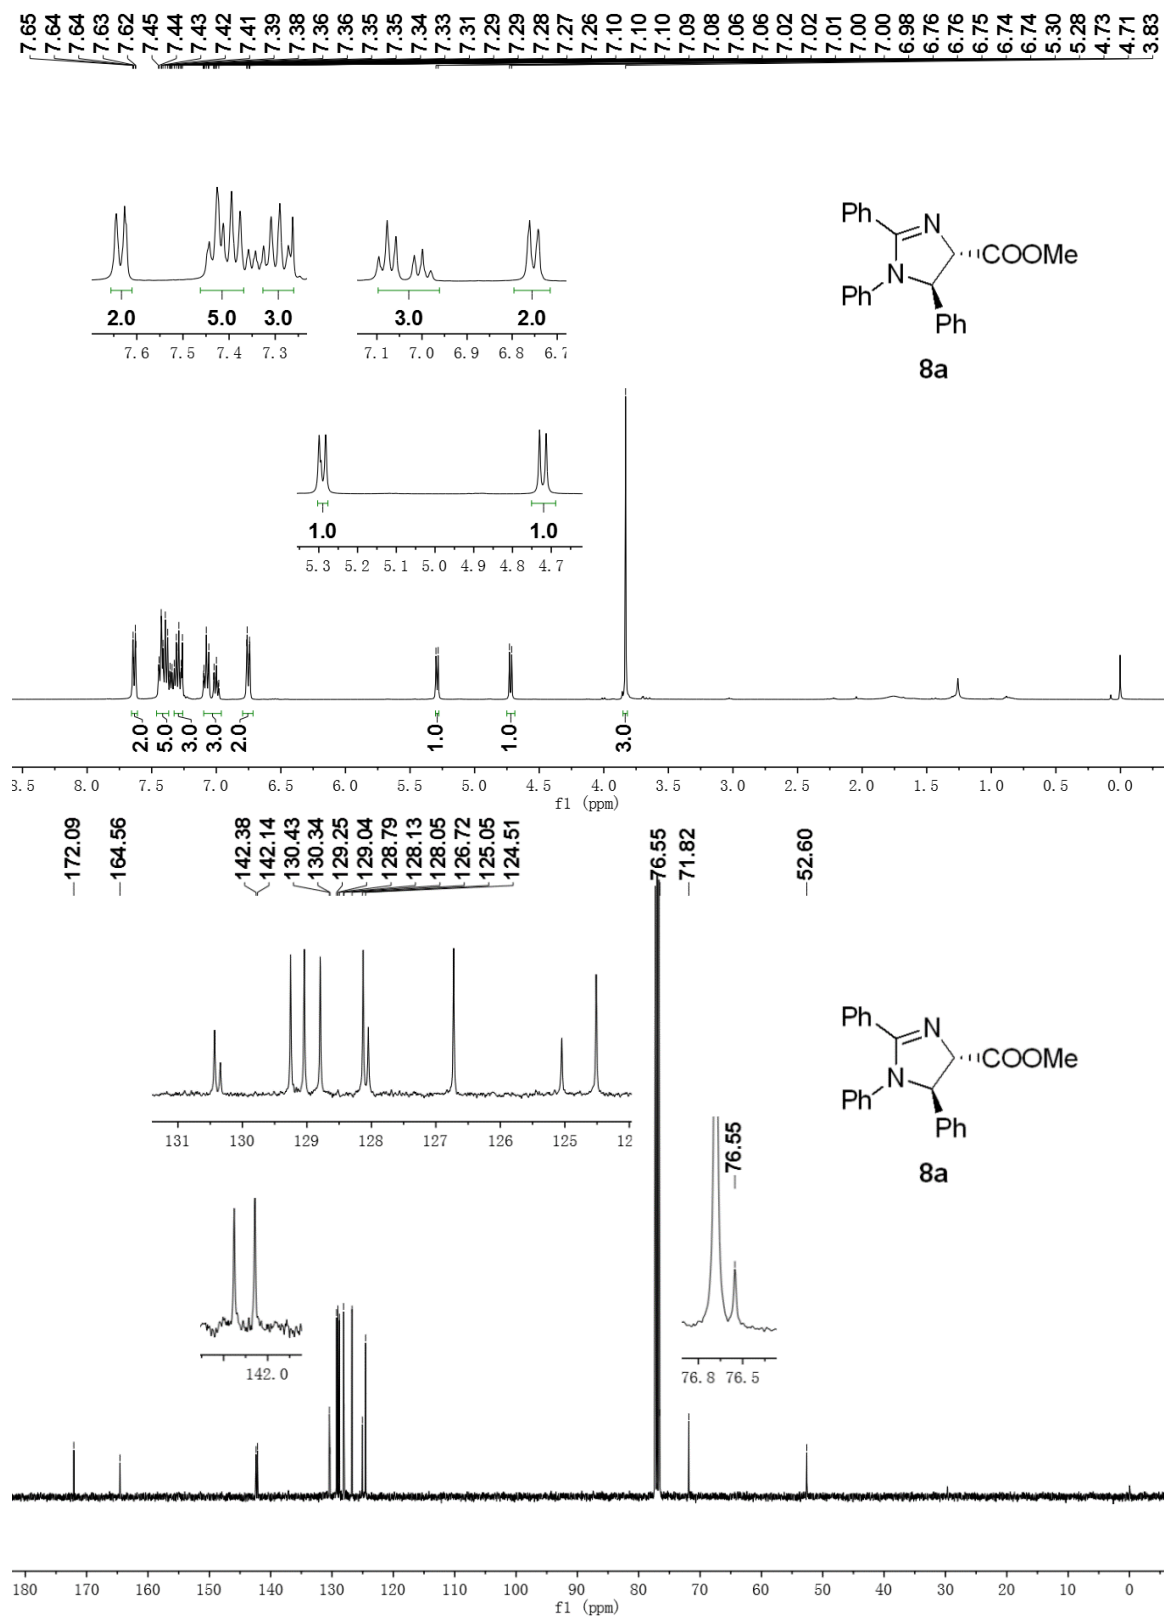

<sup>1</sup>H NMR spectra of compound of **3a** in CDCl<sub>3</sub>

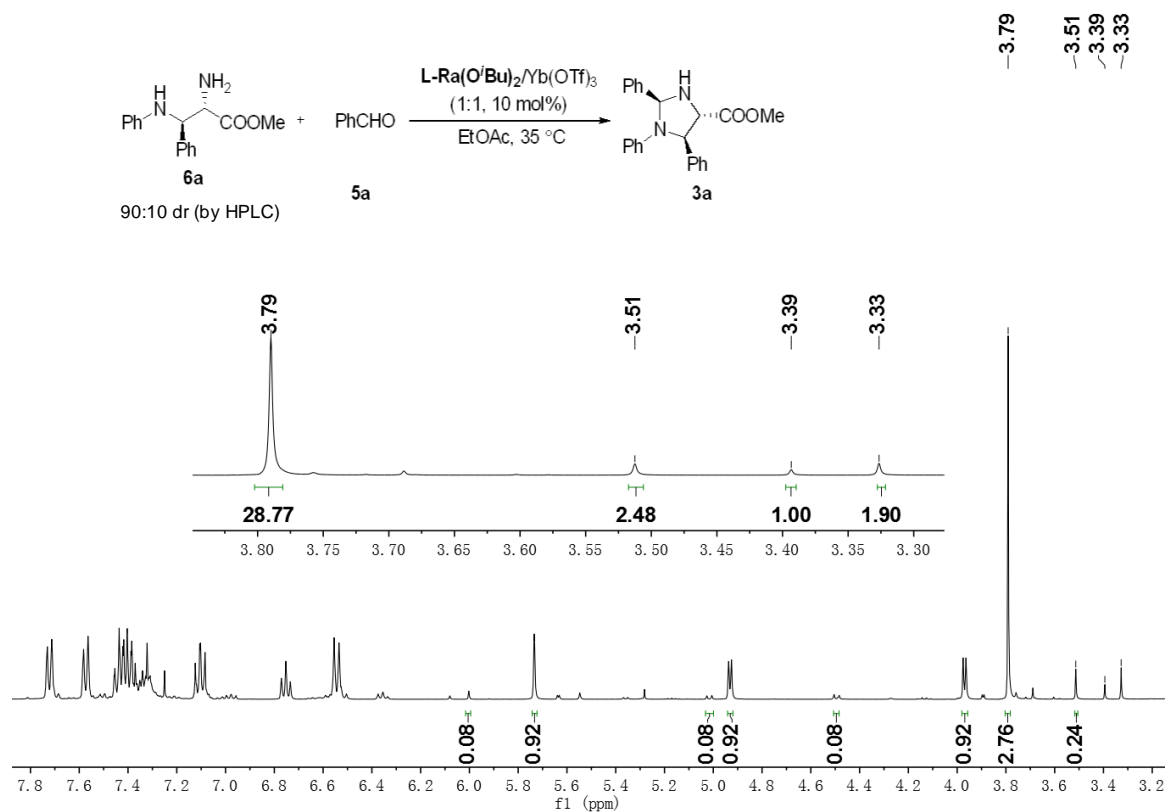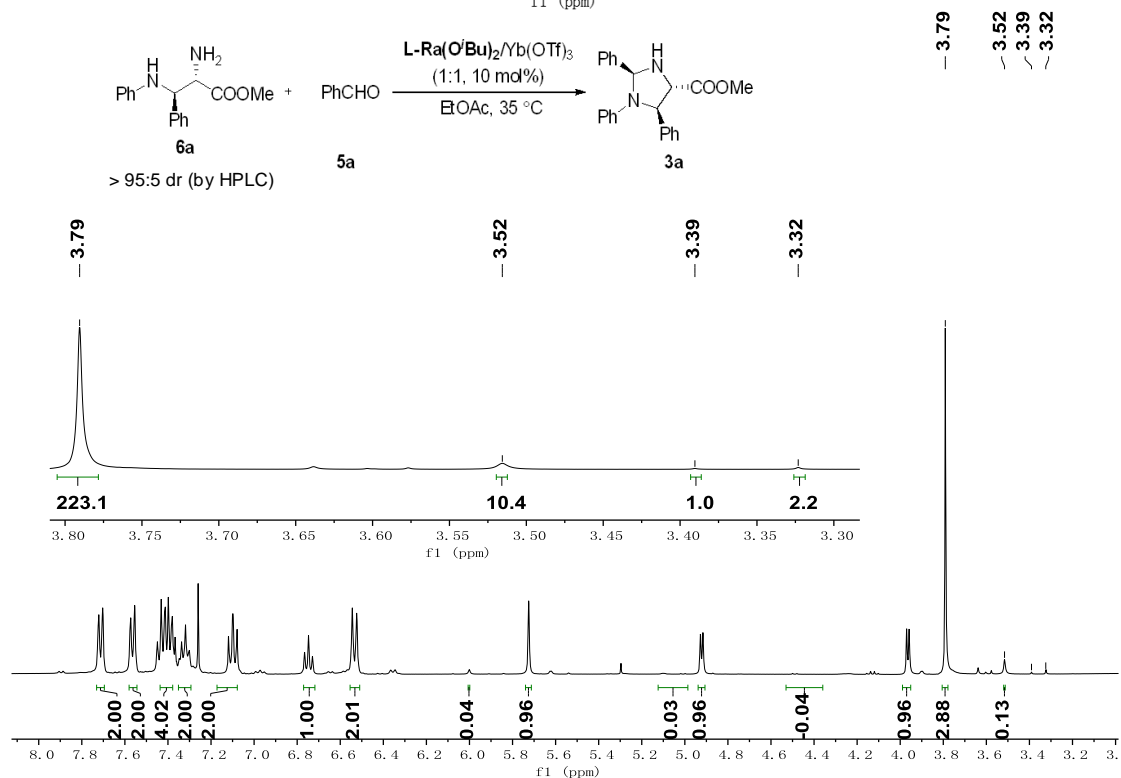

Different dr of **6a** (90:10 and >95:5) were reacted with **5a** to gain product **3a**. As <sup>1</sup>H NMR spectra showed, peak area of peak 3.39 ppm, peak 3.32 ppm were decreased with the increase of dr value. The results proposed that other isomers would produced during condensation step.

$^1\text{H}$  NMR and  $^{13}\text{C}\{^1\text{H}\}$  NMR spectra of compound of **3a** (procedure A) in  $\text{CDCl}_3$

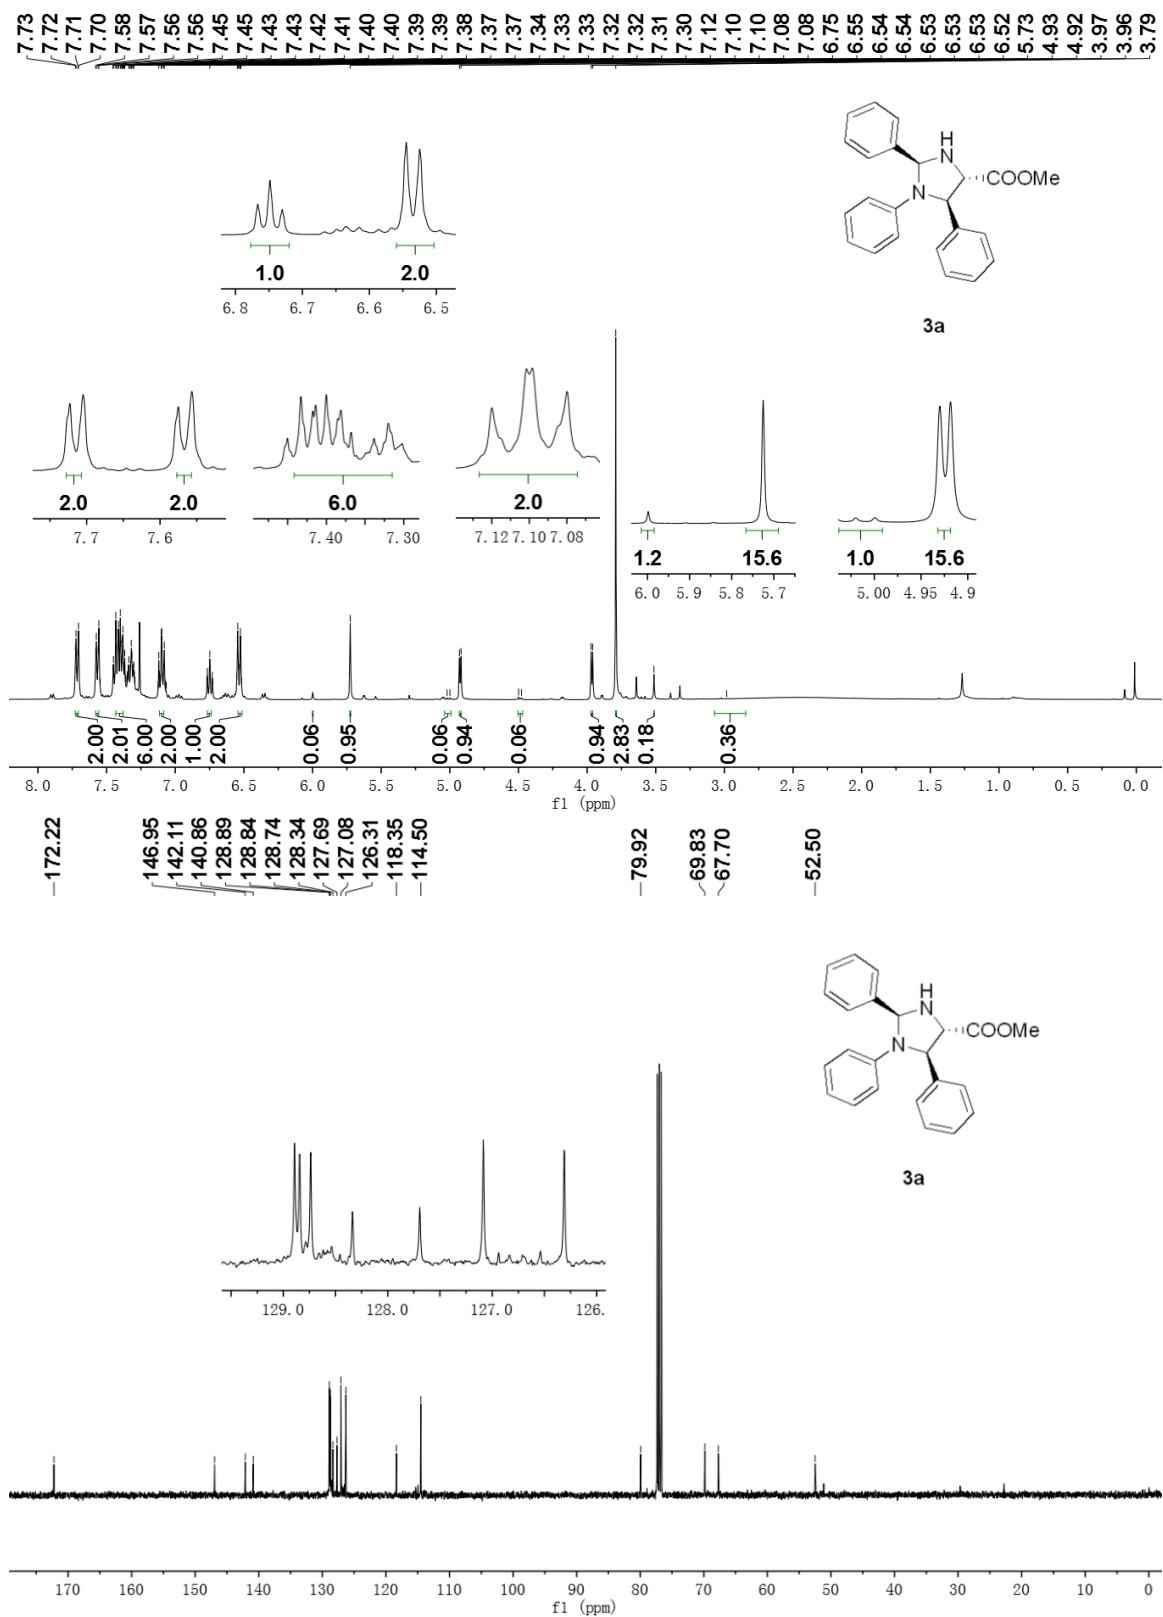



$^1\text{H}$  NMR and  $^{13}\text{C}\{^1\text{H}\}$  NMR spectra of compound of **3a** (procedure B) in  $\text{CDCl}_3$

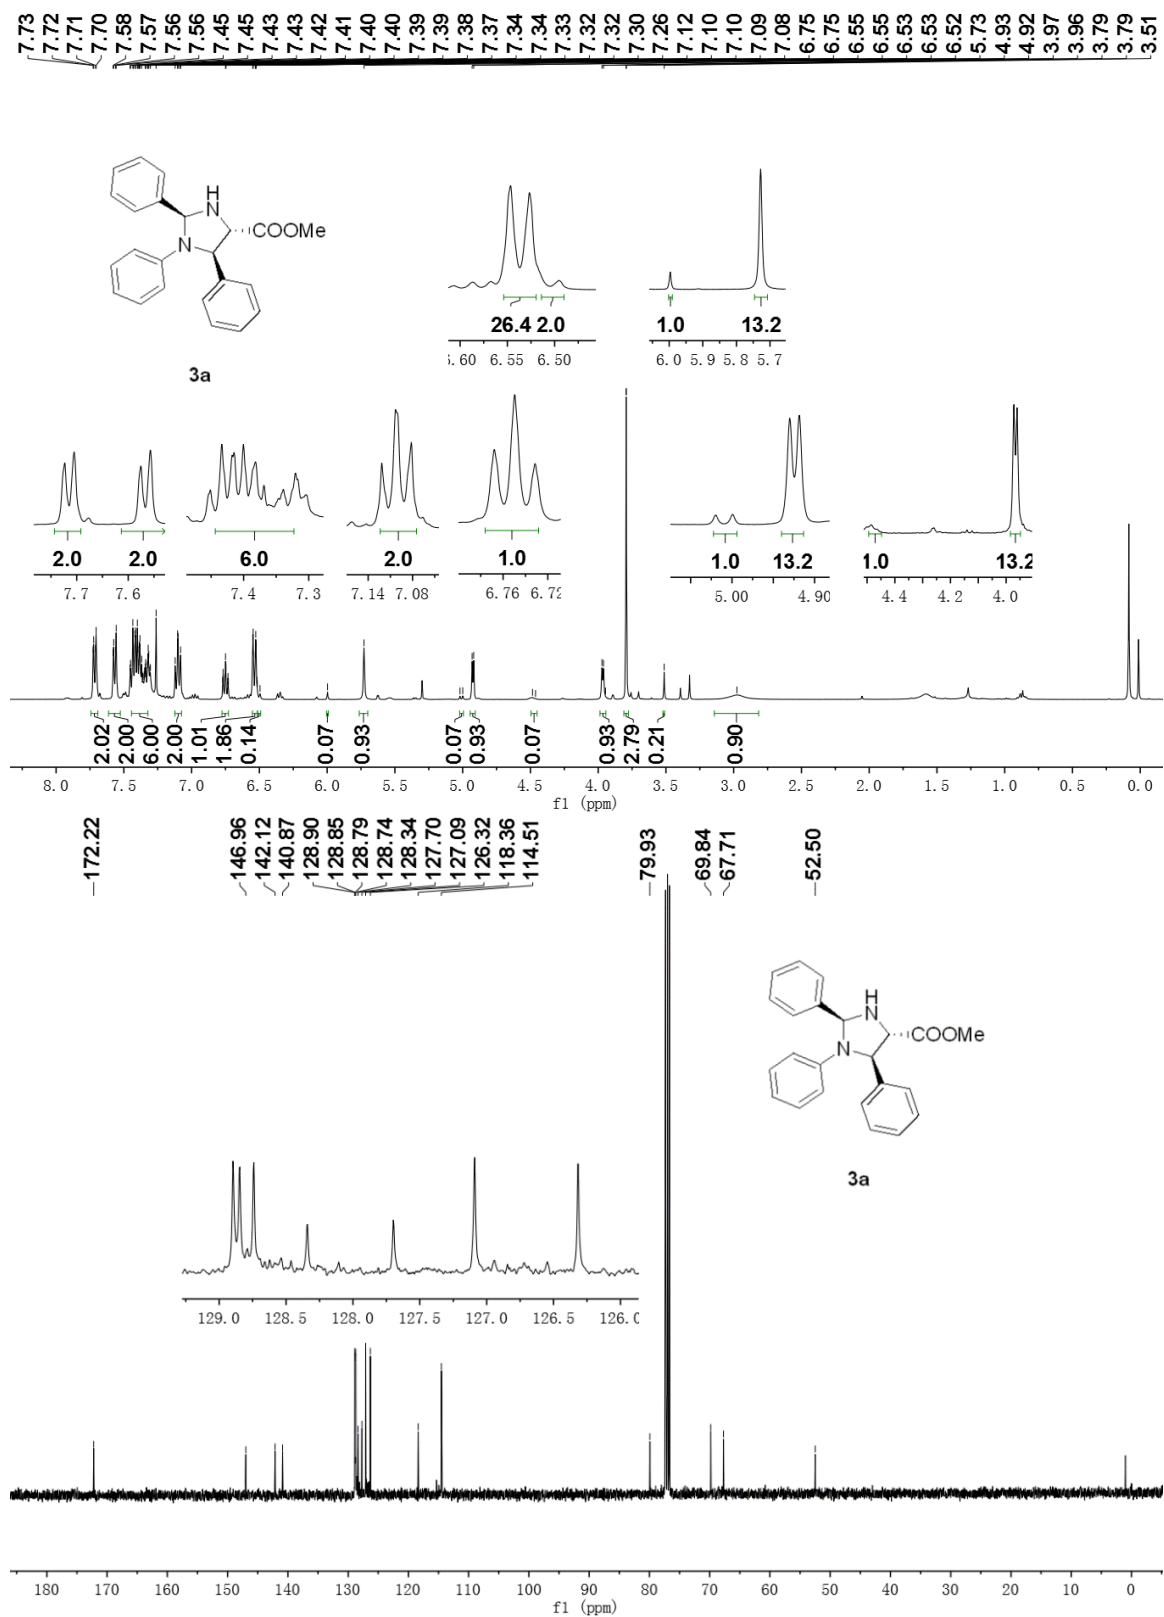

$^1\text{H}$  NMR and  $^{13}\text{C}\{^1\text{H}\}$  NMR spectra of compound of (2*R*,4*R*,5*S*)-**3a** (procedure A) in  $\text{CDCl}_3$

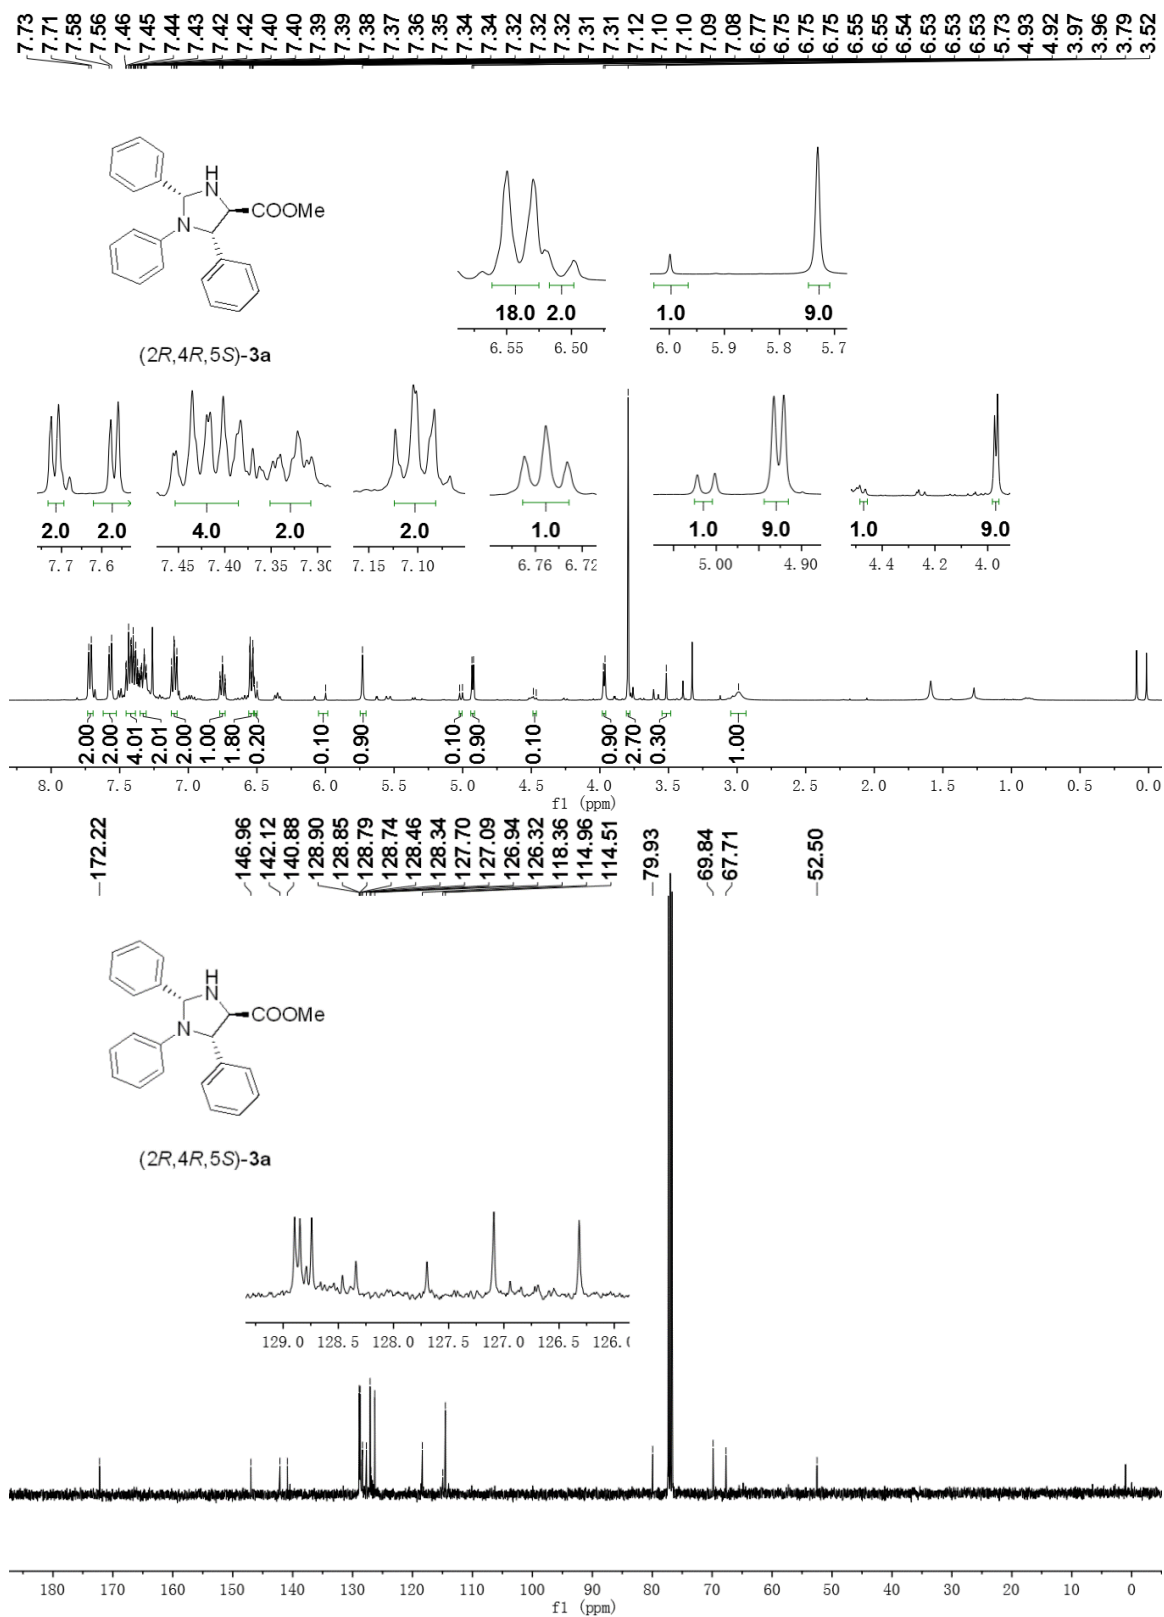

$^1\text{H}$  NMR and  $^{13}\text{C}\{^1\text{H}\}$  NMR spectra of compound of **3b** (procedure A) in  $\text{CDCl}_3$

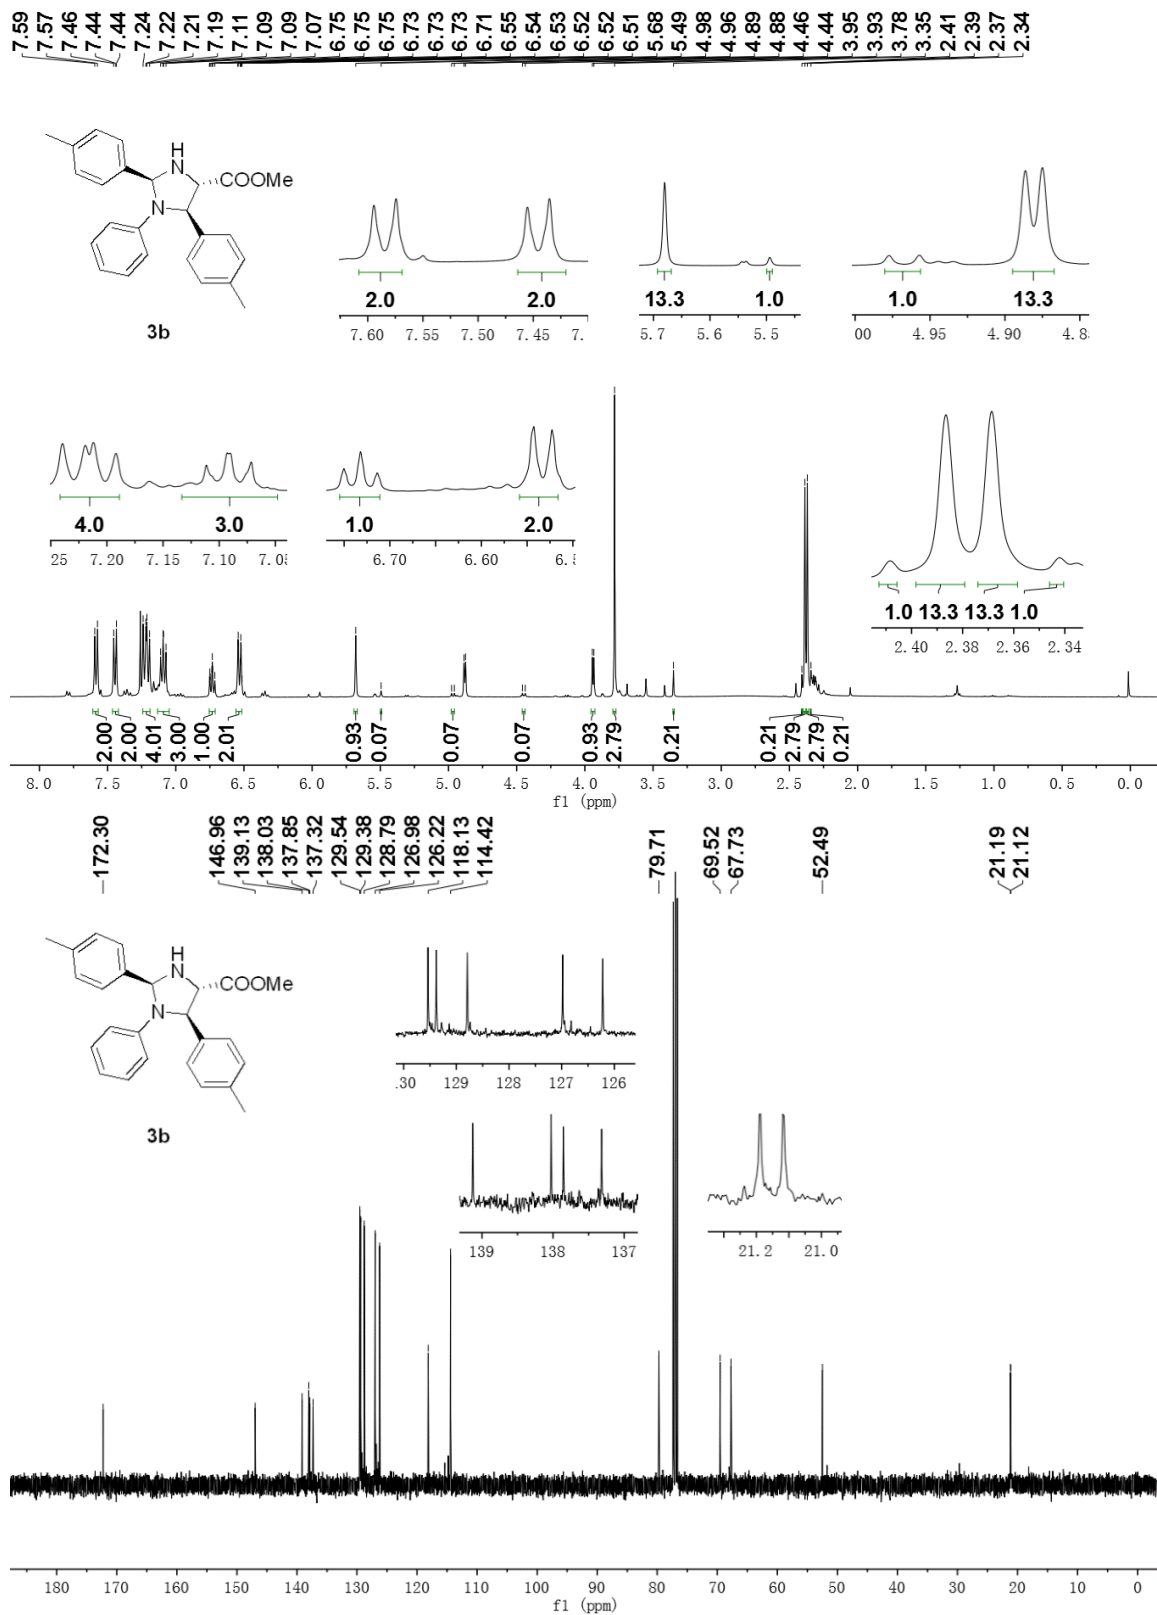

$^1\text{H}$  NMR and  $^{13}\text{C}\{^1\text{H}\}$  NMR spectra of compound of **3b** (procedure B) in  $\text{CDCl}_3$

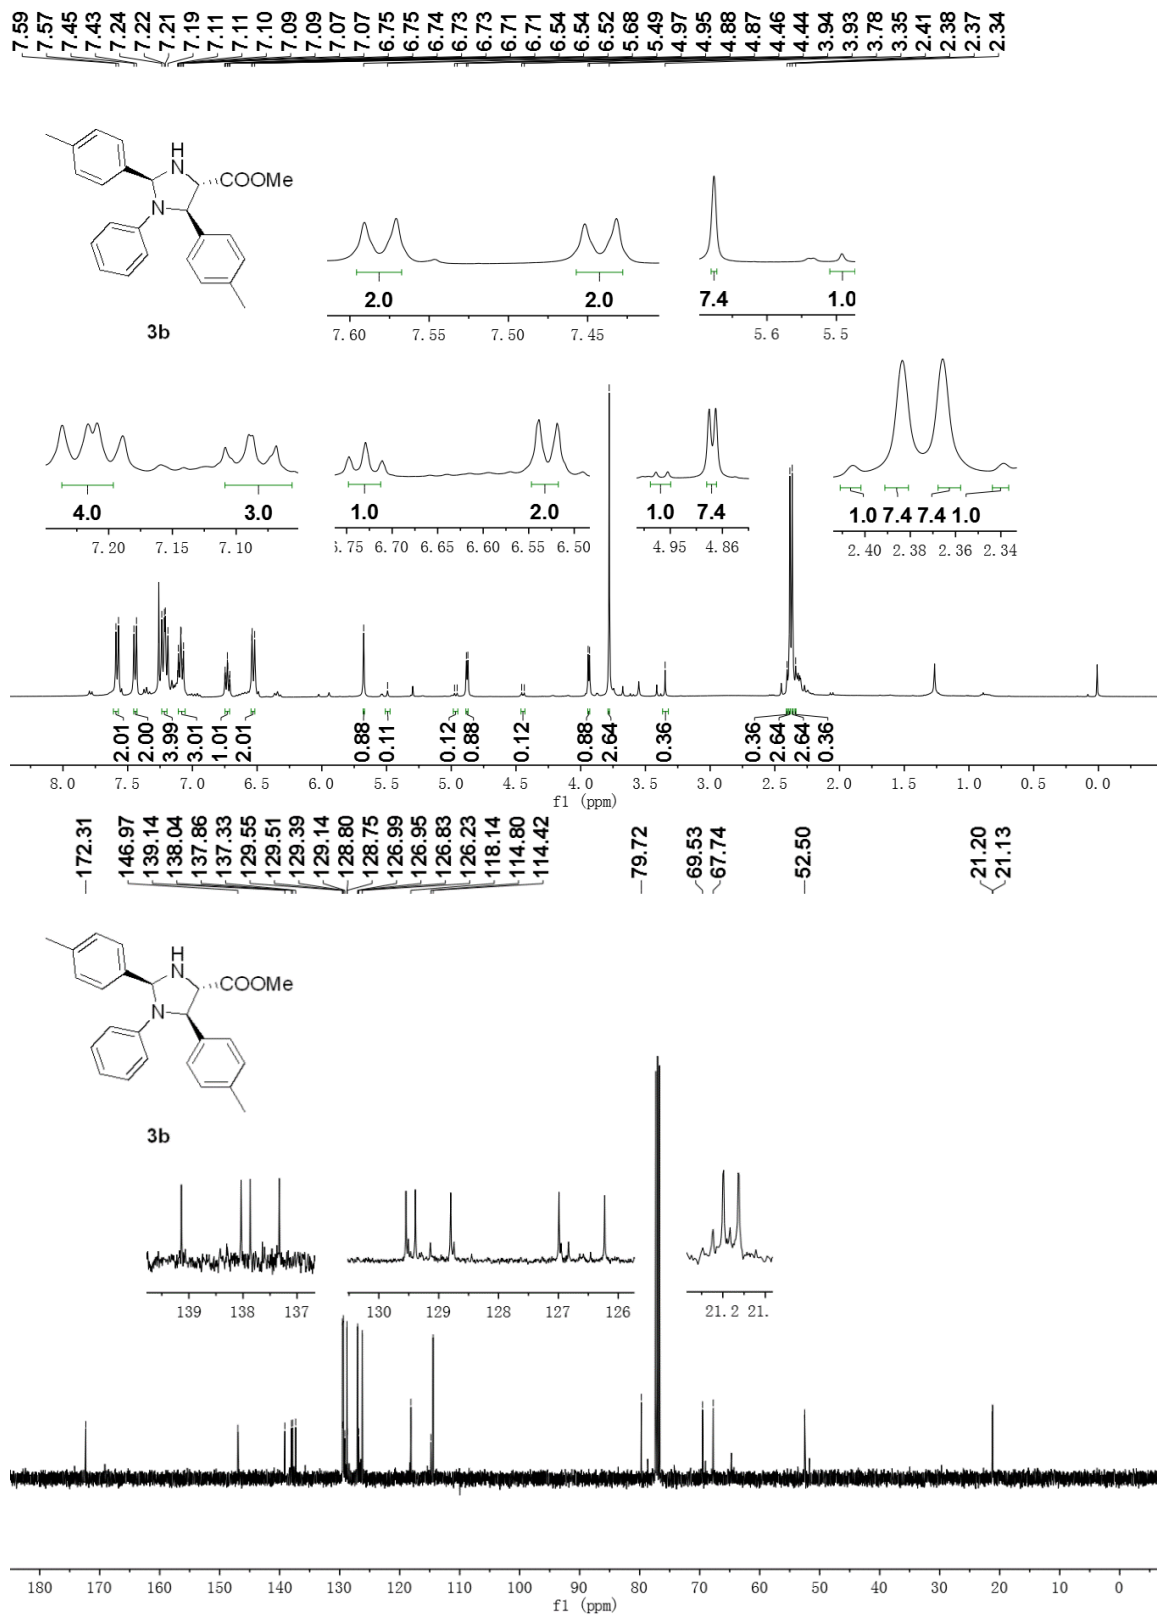

$^1\text{H}$  NMR and  $^{13}\text{C}\{^1\text{H}\}$  NMR spectra of compound of **3c** (procedure A) in  $\text{CDCl}_3$

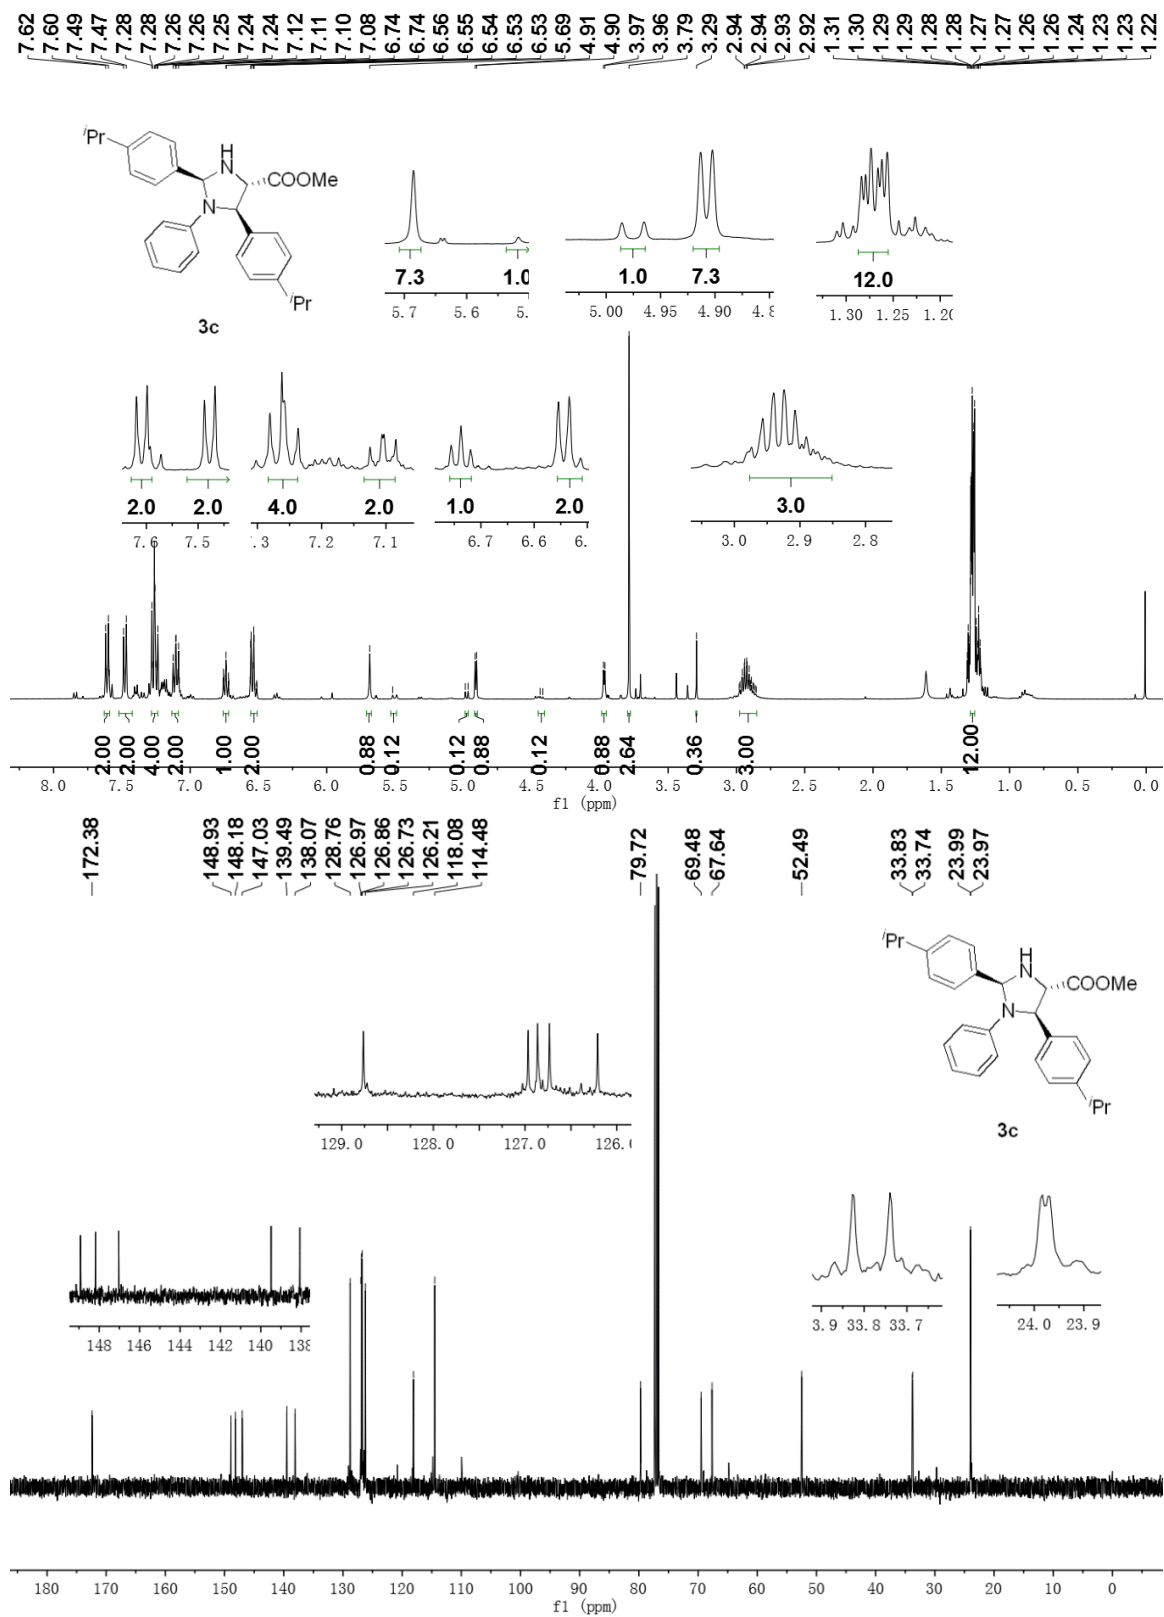

$^1\text{H}$  NMR and  $^{13}\text{C}\{^1\text{H}\}$  NMR spectra of compound of **3d** (procedure A) in  $\text{CDCl}_3$

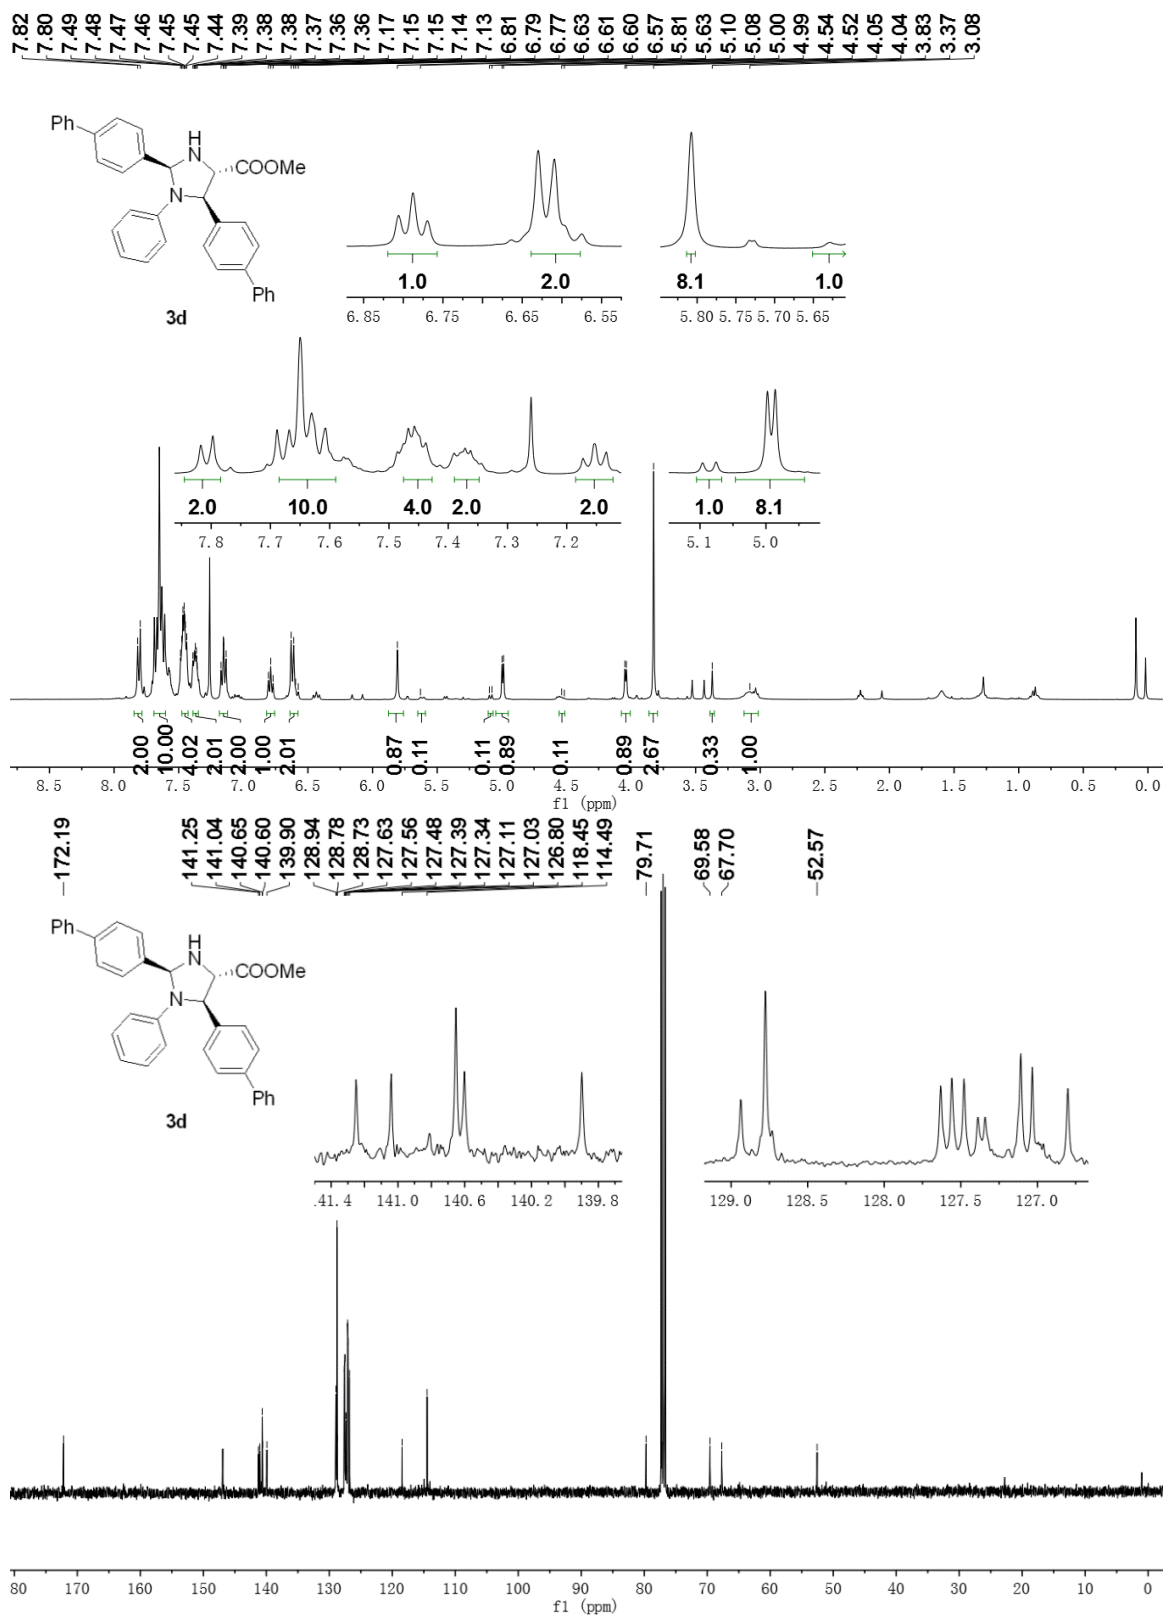

$^1\text{H}$  NMR and  $^{13}\text{C}\{^1\text{H}\}$  NMR spectra of compound of (2*R*,4*R*,5*S*)-**3d** (procedure A) in  $\text{CDCl}_3$

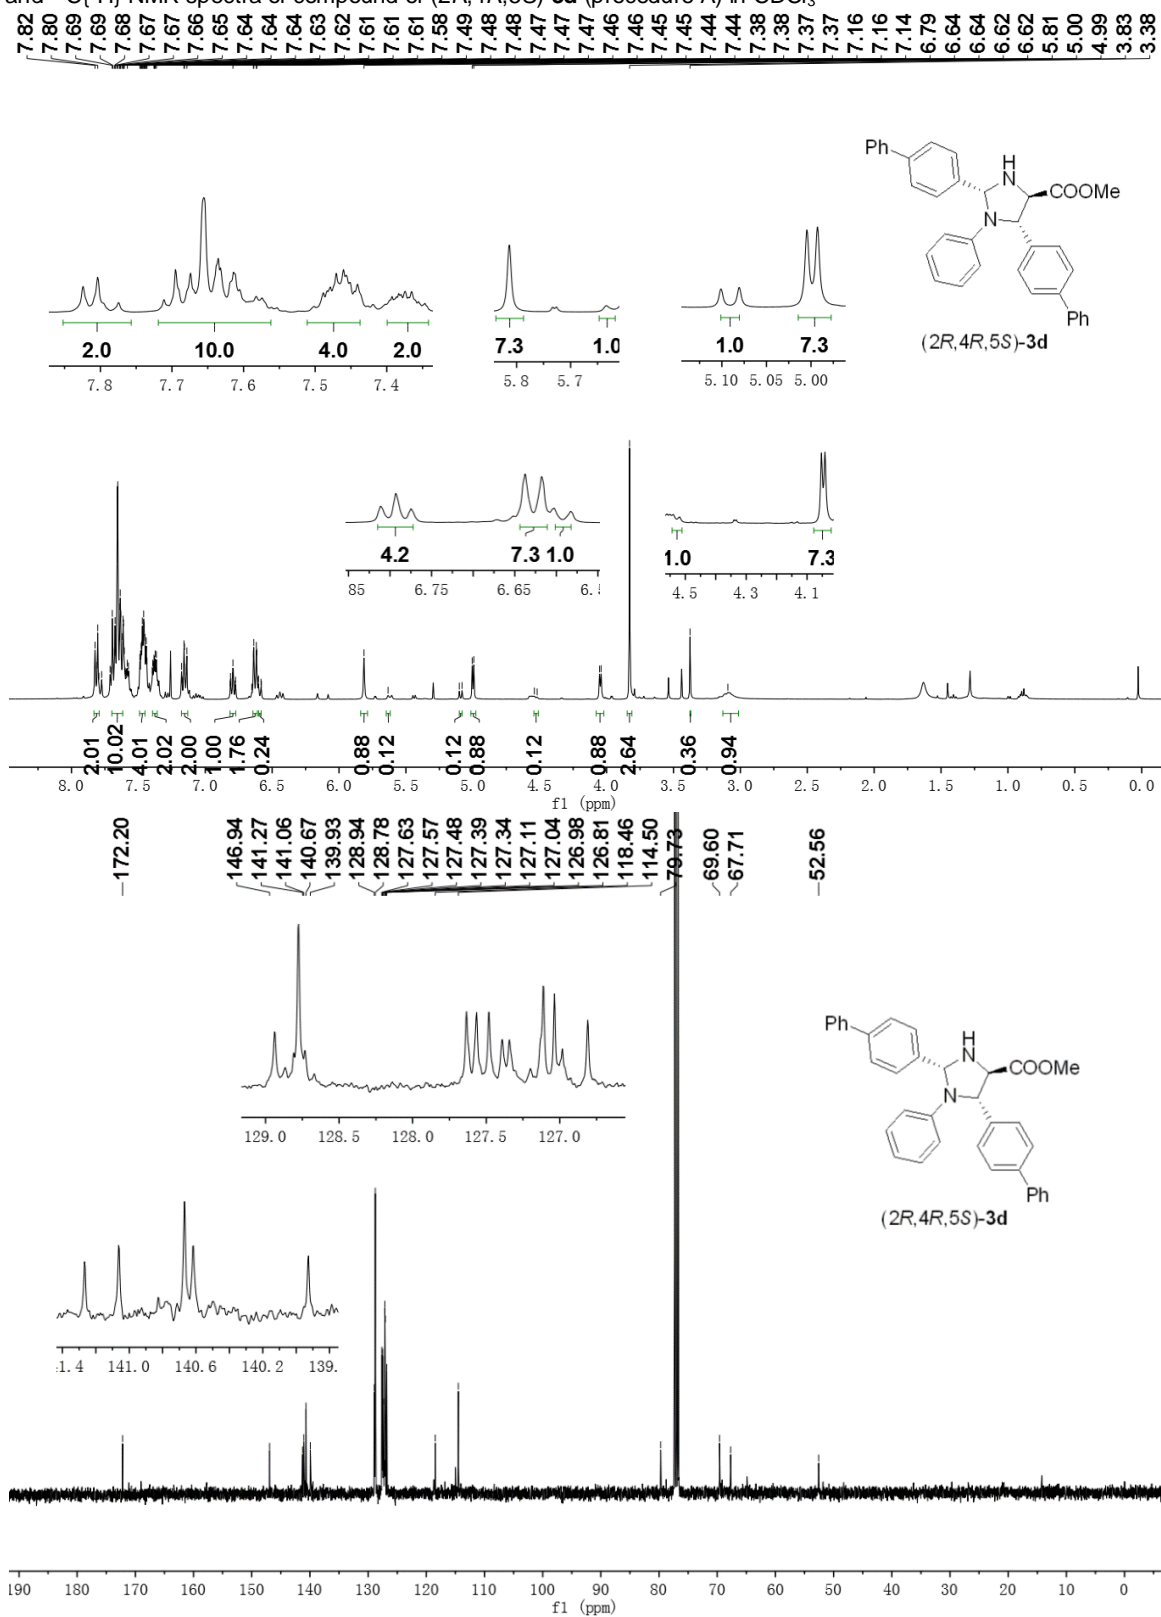

$^1\text{H}$  NMR and  $^{13}\text{C}\{^1\text{H}\}$  NMR spectra of compound of **3e** (procedure A) in  $\text{CDCl}_3$

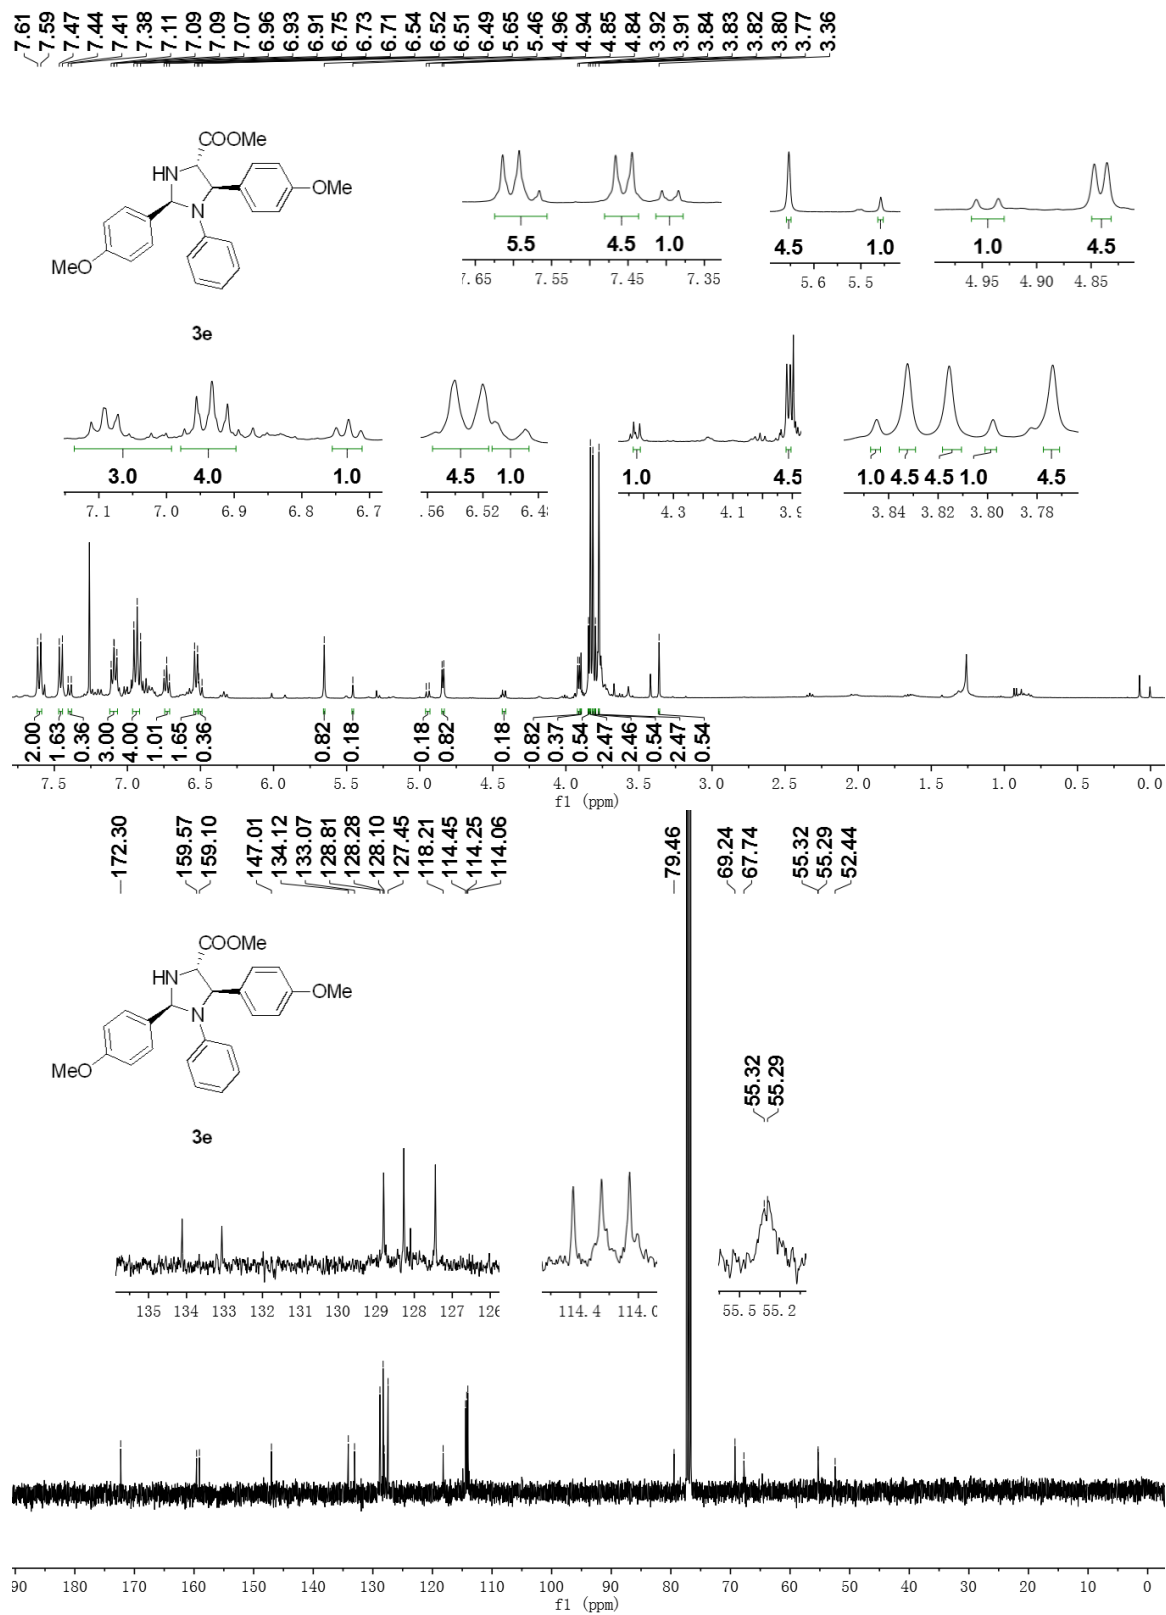



$^1\text{H}$  NMR and  $^{13}\text{C}\{^1\text{H}\}$  NMR spectra of compound of **3f** (procedure A) in  $\text{CDCl}_3$

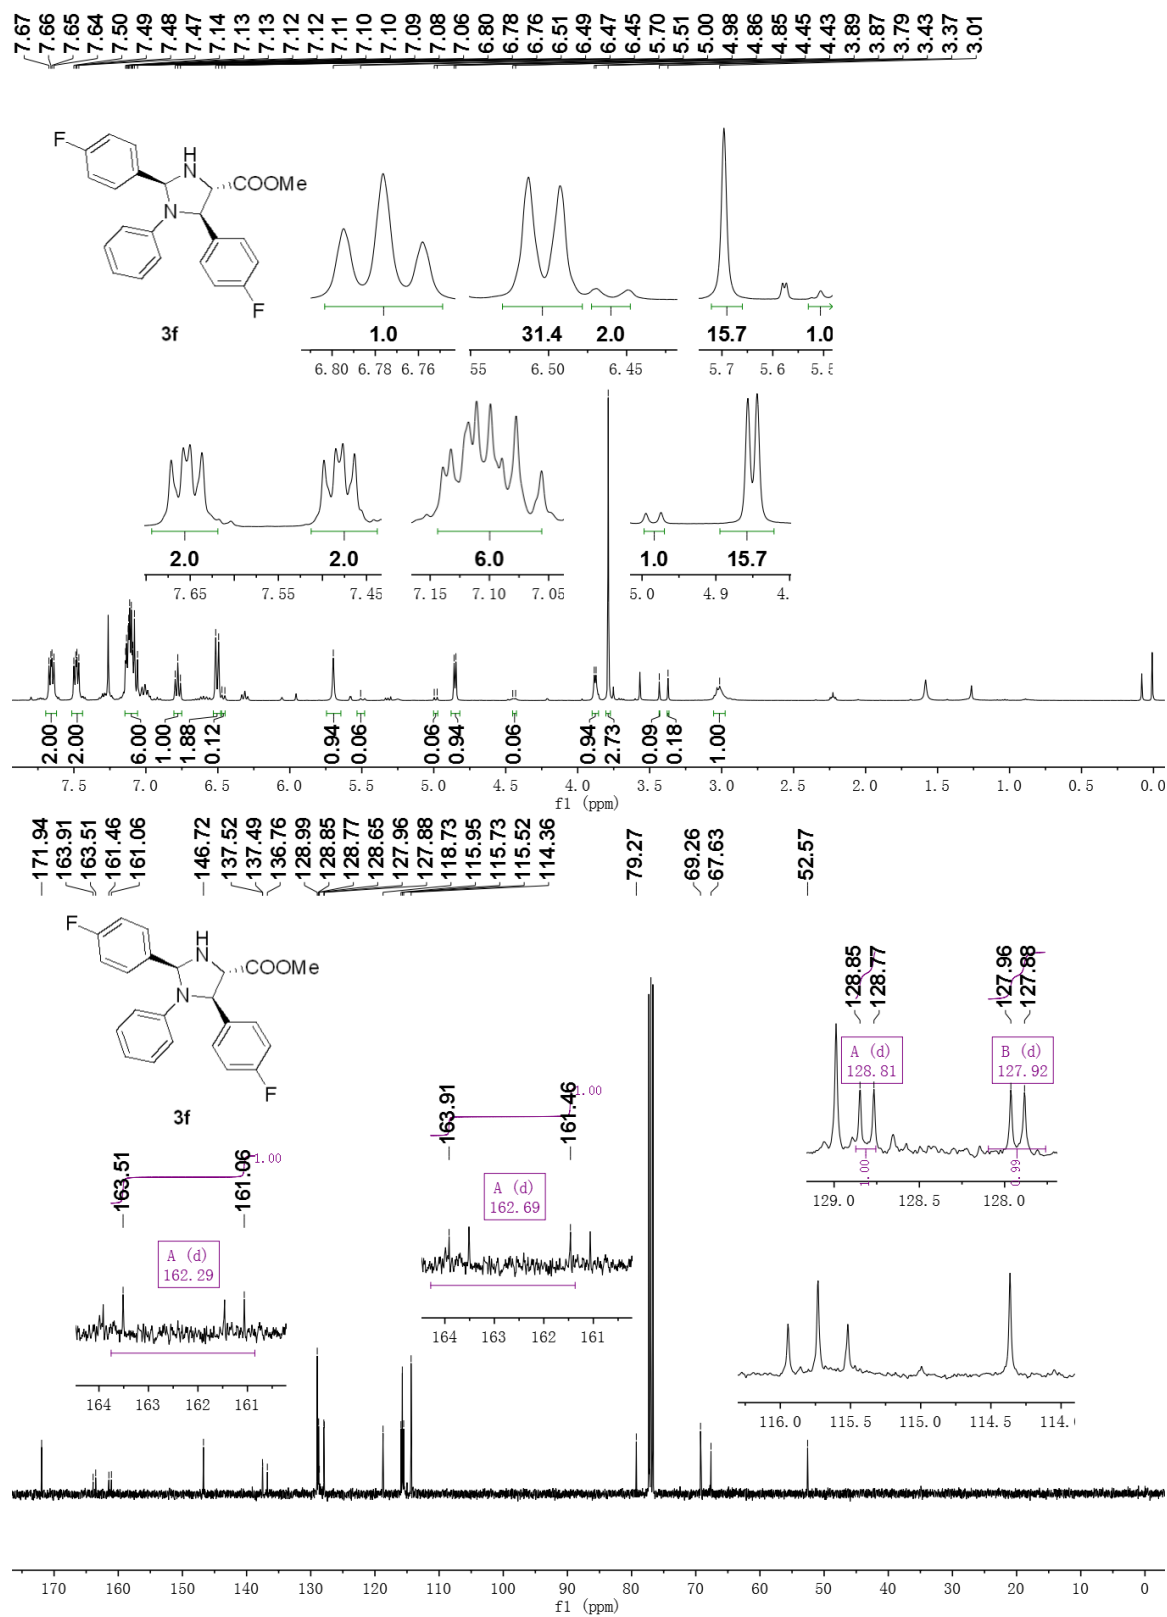

$^{19}\text{F}\{^1\text{H}\}$  NMR spectra of compound of **3f** (procedure A) in  $\text{CDCl}_3$

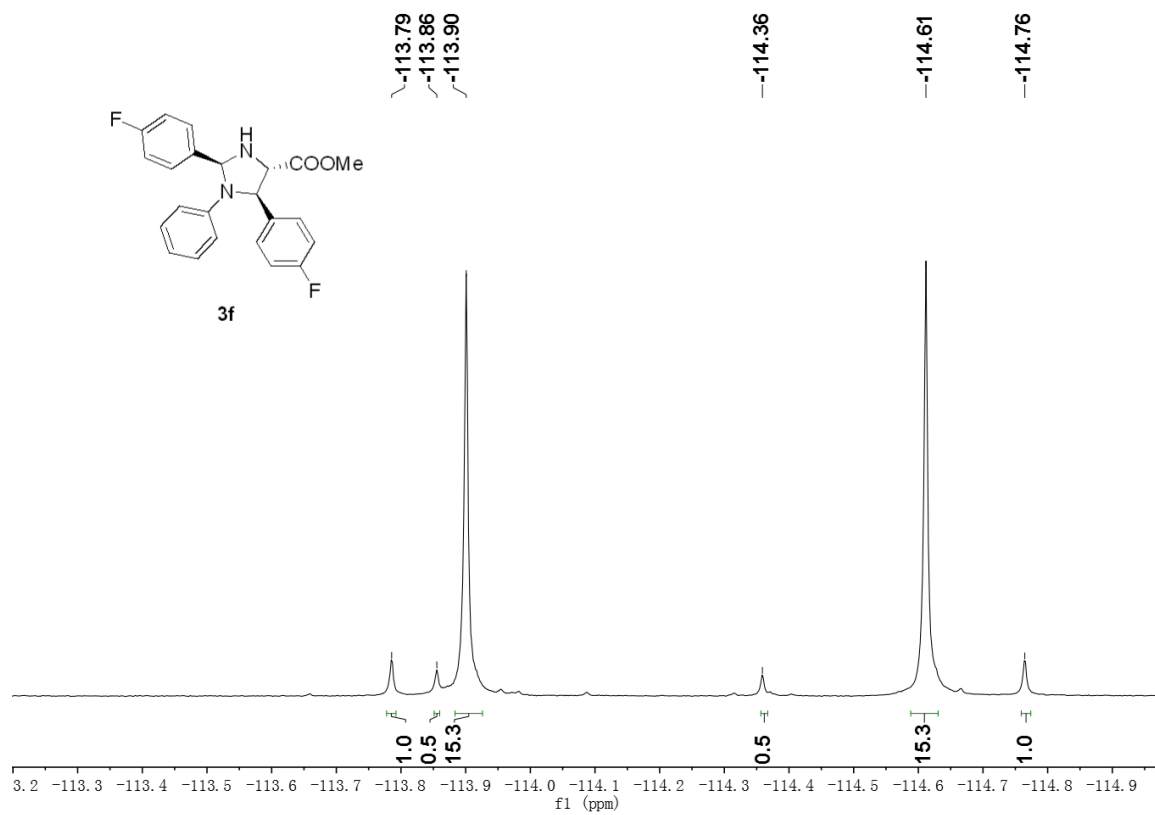

$^1\text{H}$  NMR and  $^{13}\text{C}\{^1\text{H}\}$  NMR spectra of compound of **3g** (procedure A) in  $\text{CDCl}_3$

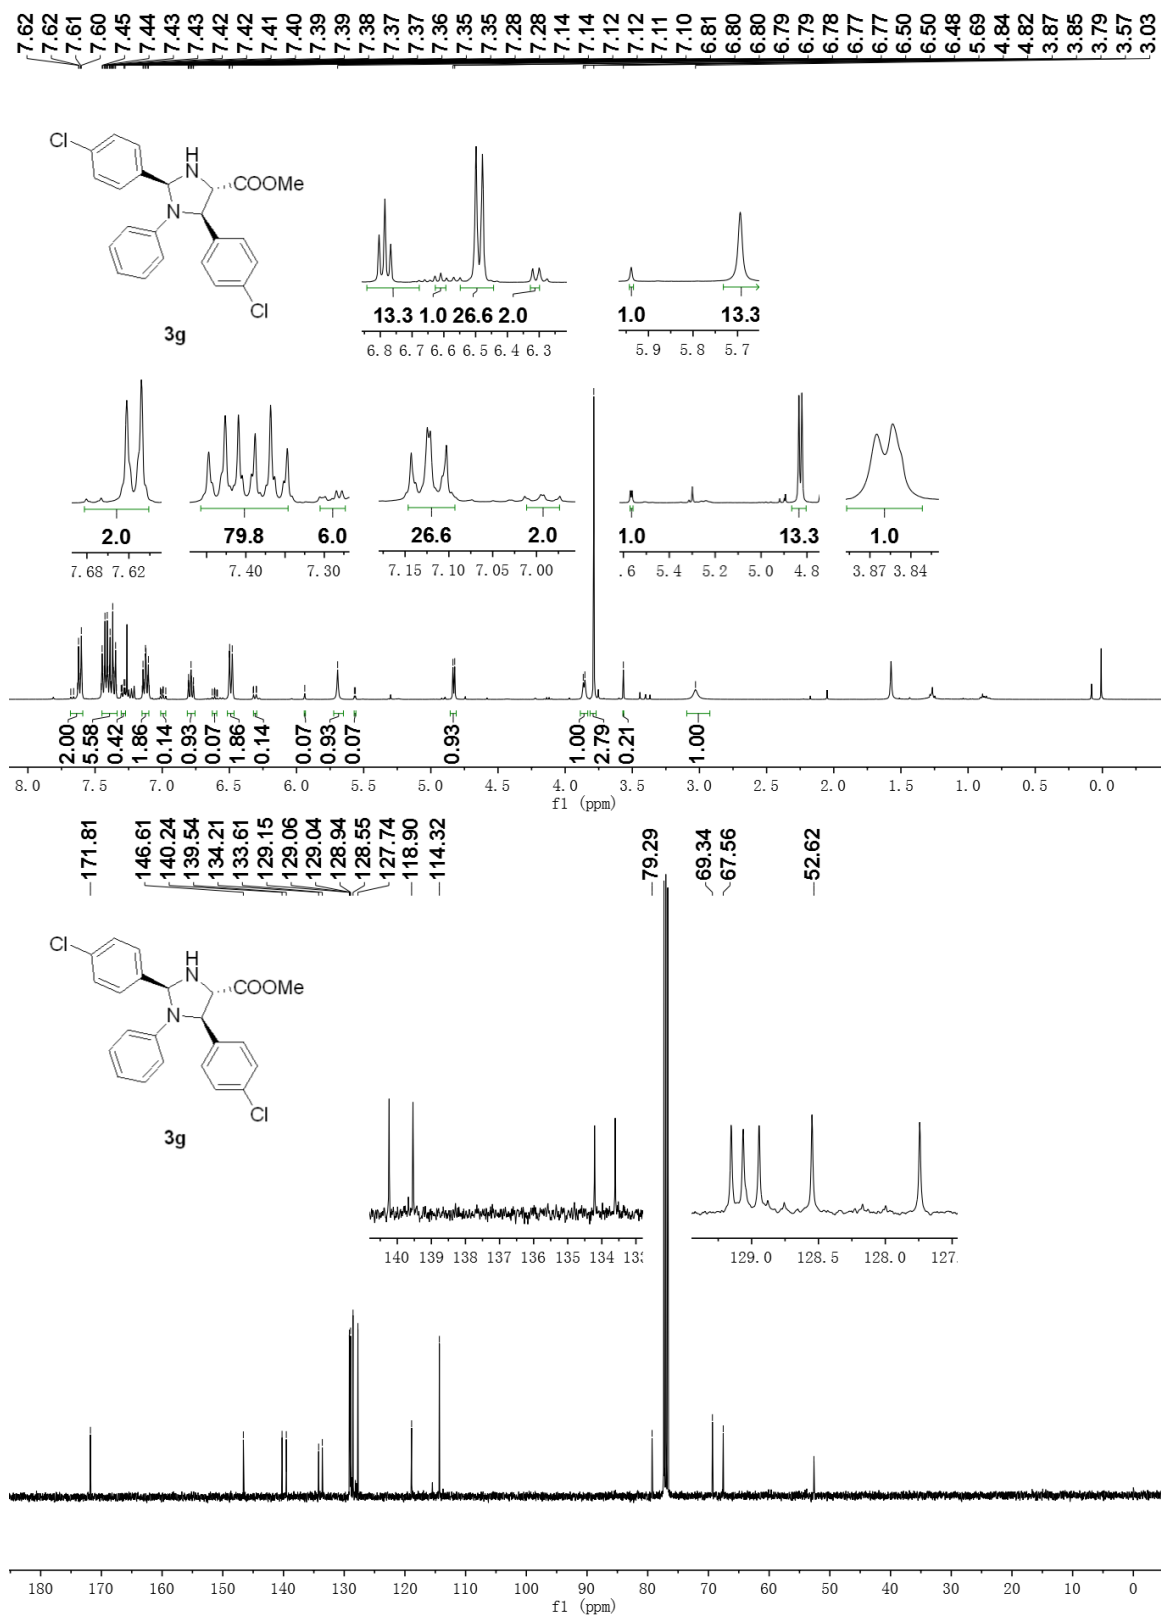

$^1\text{H}$  NMR and  $^{13}\text{C}\{^1\text{H}\}$  NMR spectra of compound of **3g** (procedure B) in  $\text{CDCl}_3$

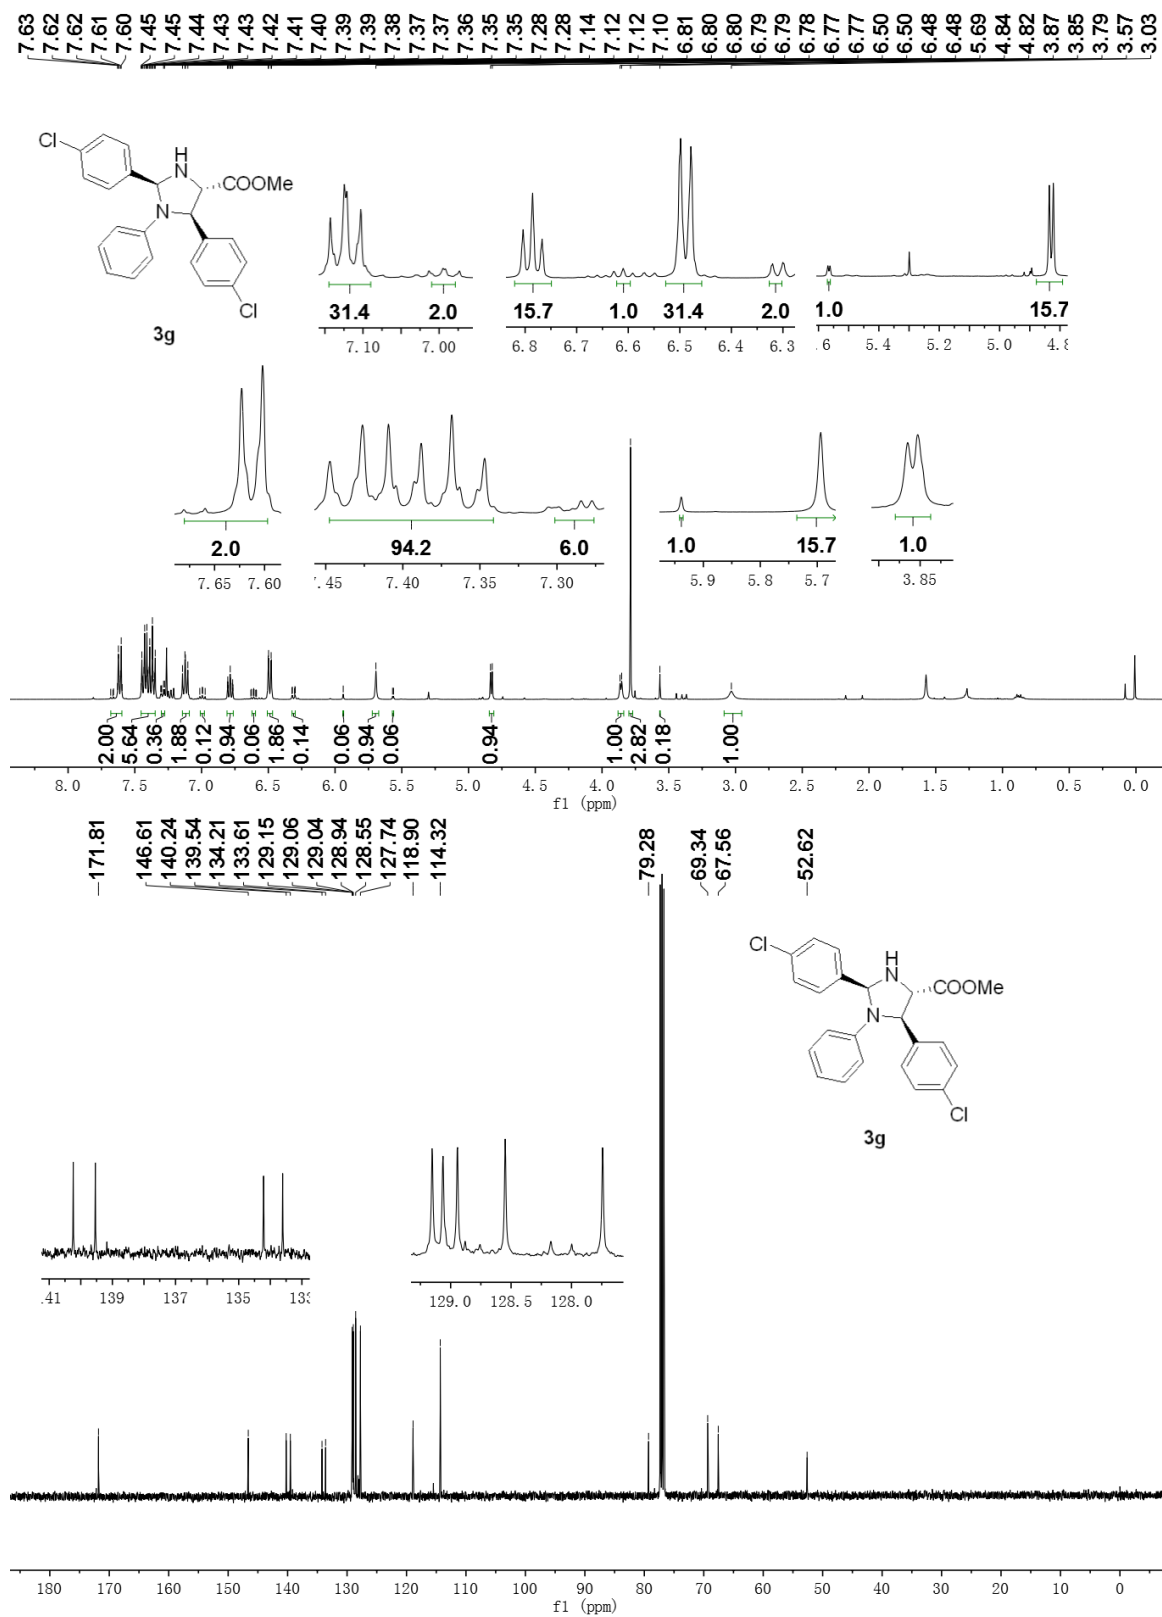

$^1\text{H}$  NMR and  $^{13}\text{C}\{^1\text{H}\}$  NMR spectra of compound of **3h** (procedure A) in  $\text{CDCl}_3$

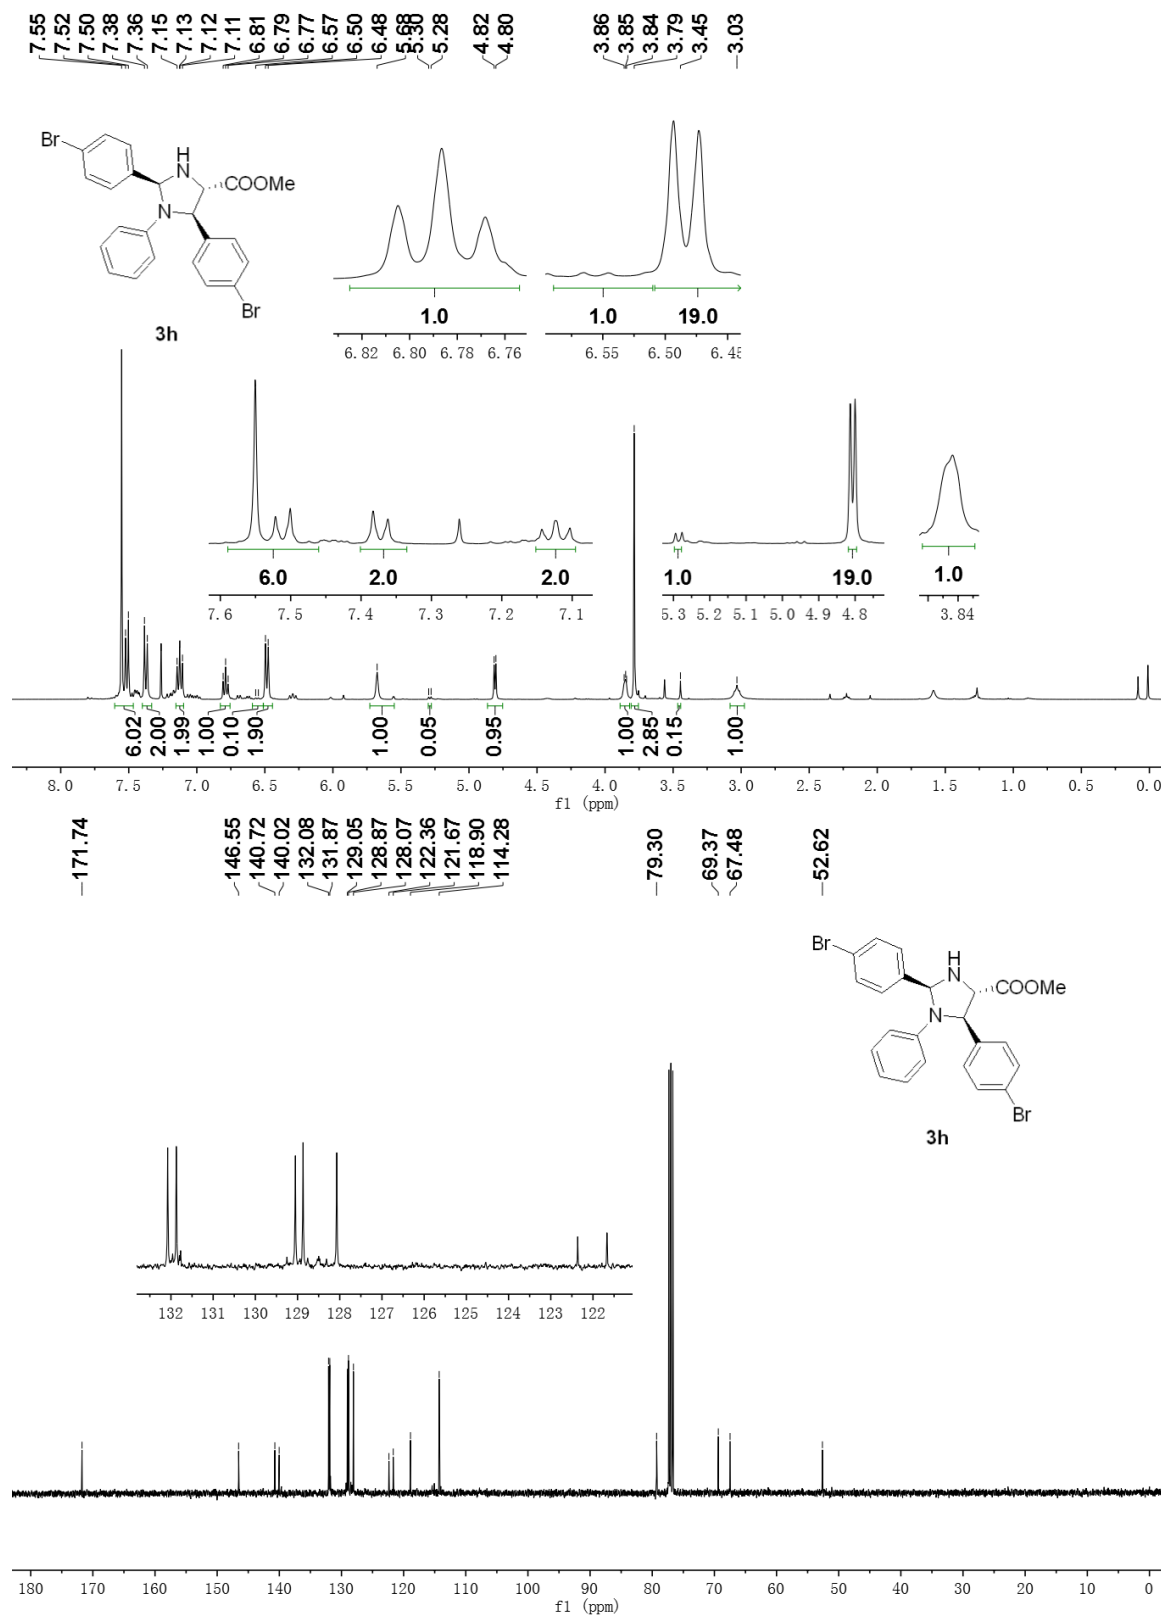

$^1\text{H}$  NMR and  $^{13}\text{C}\{^1\text{H}\}$  NMR spectra of compound of **3i** (procedure A) in  $\text{CDCl}_3$

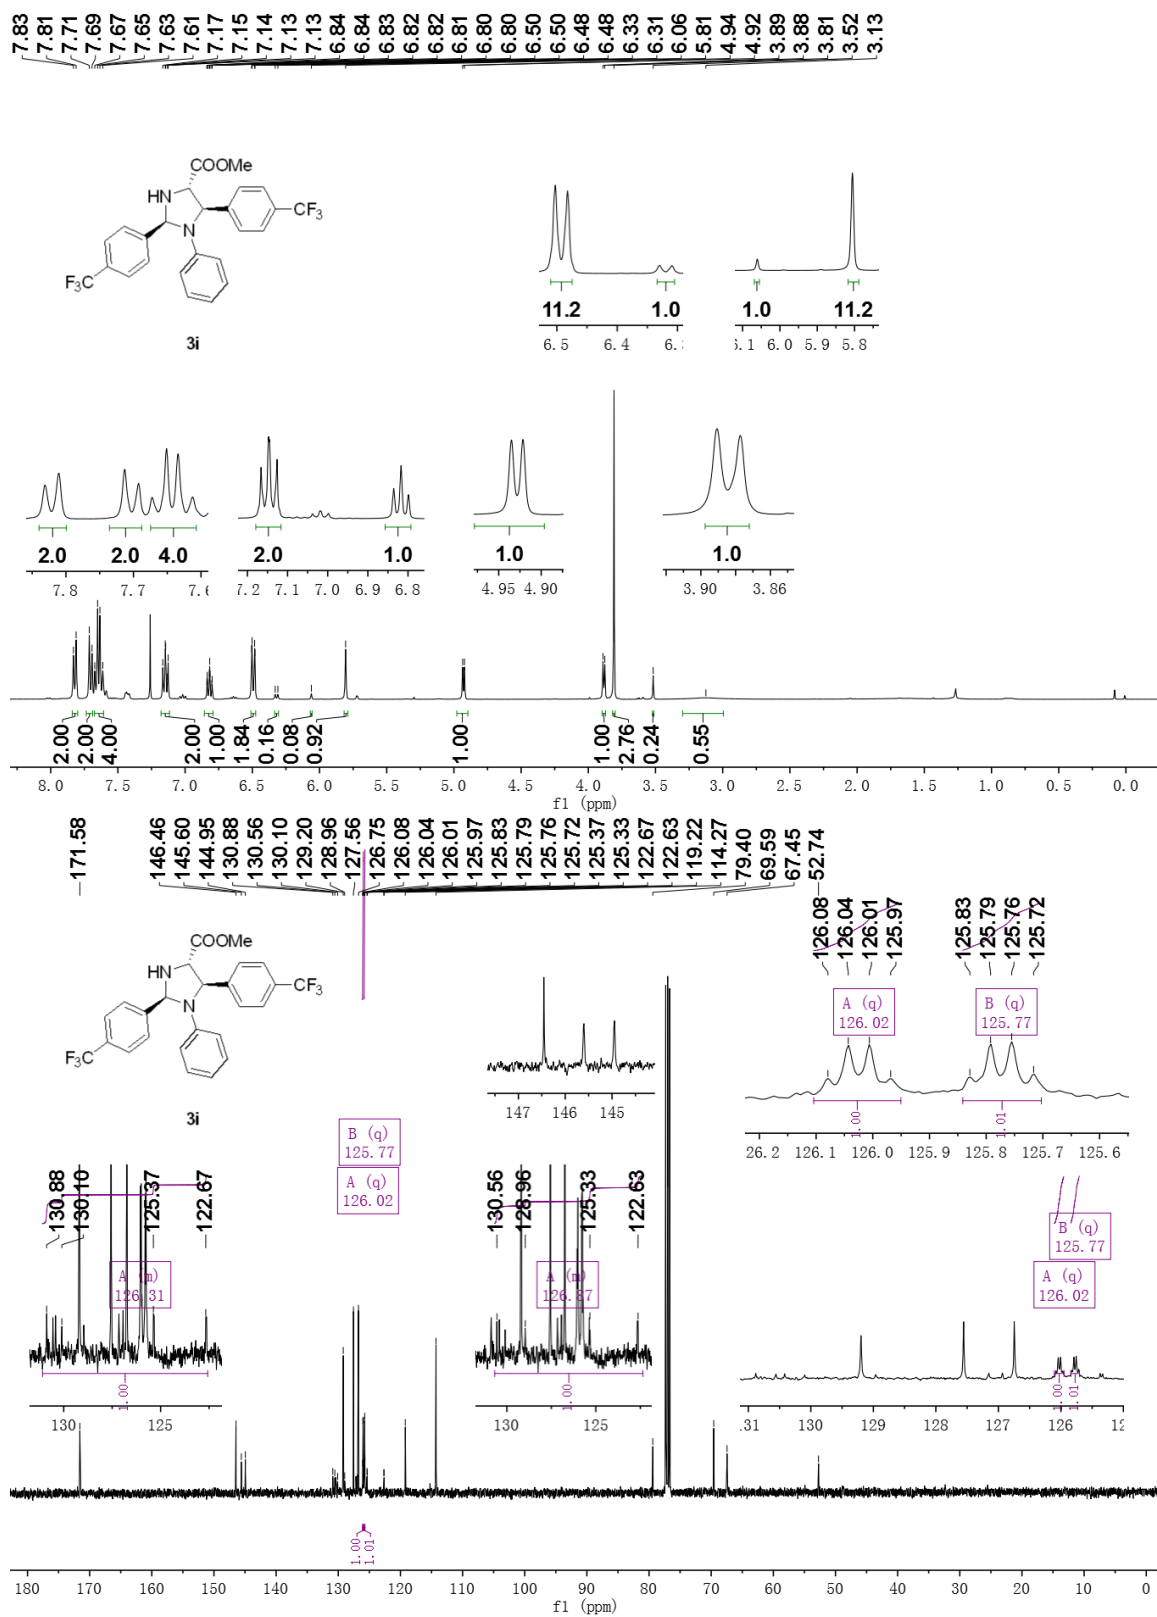

$^{19}\text{F}\{^1\text{H}\}$  NMR spectra of compound of **3i** (procedure A) in  $\text{CDCl}_3$

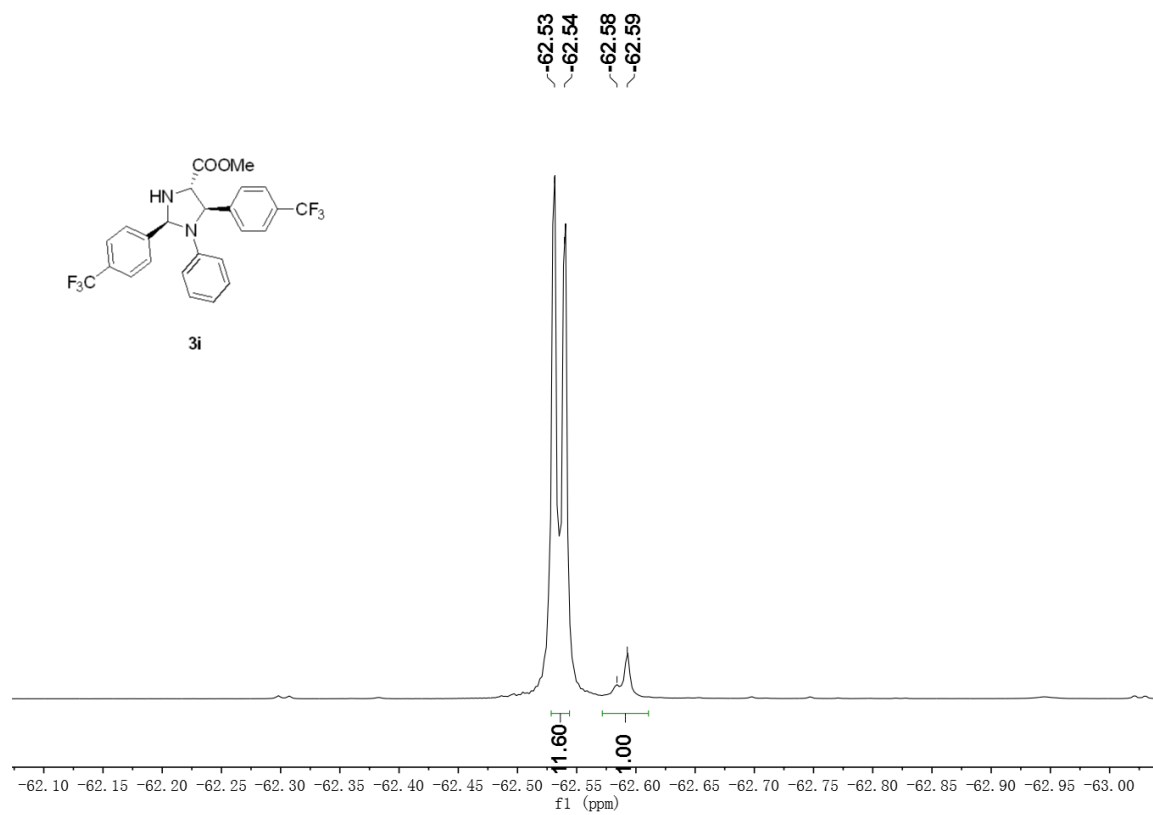

$^1\text{H}$  NMR and  $^{13}\text{C}\{^1\text{H}\}$  NMR spectra of compound of **3j** (procedure A) in  $\text{CDCl}_3$

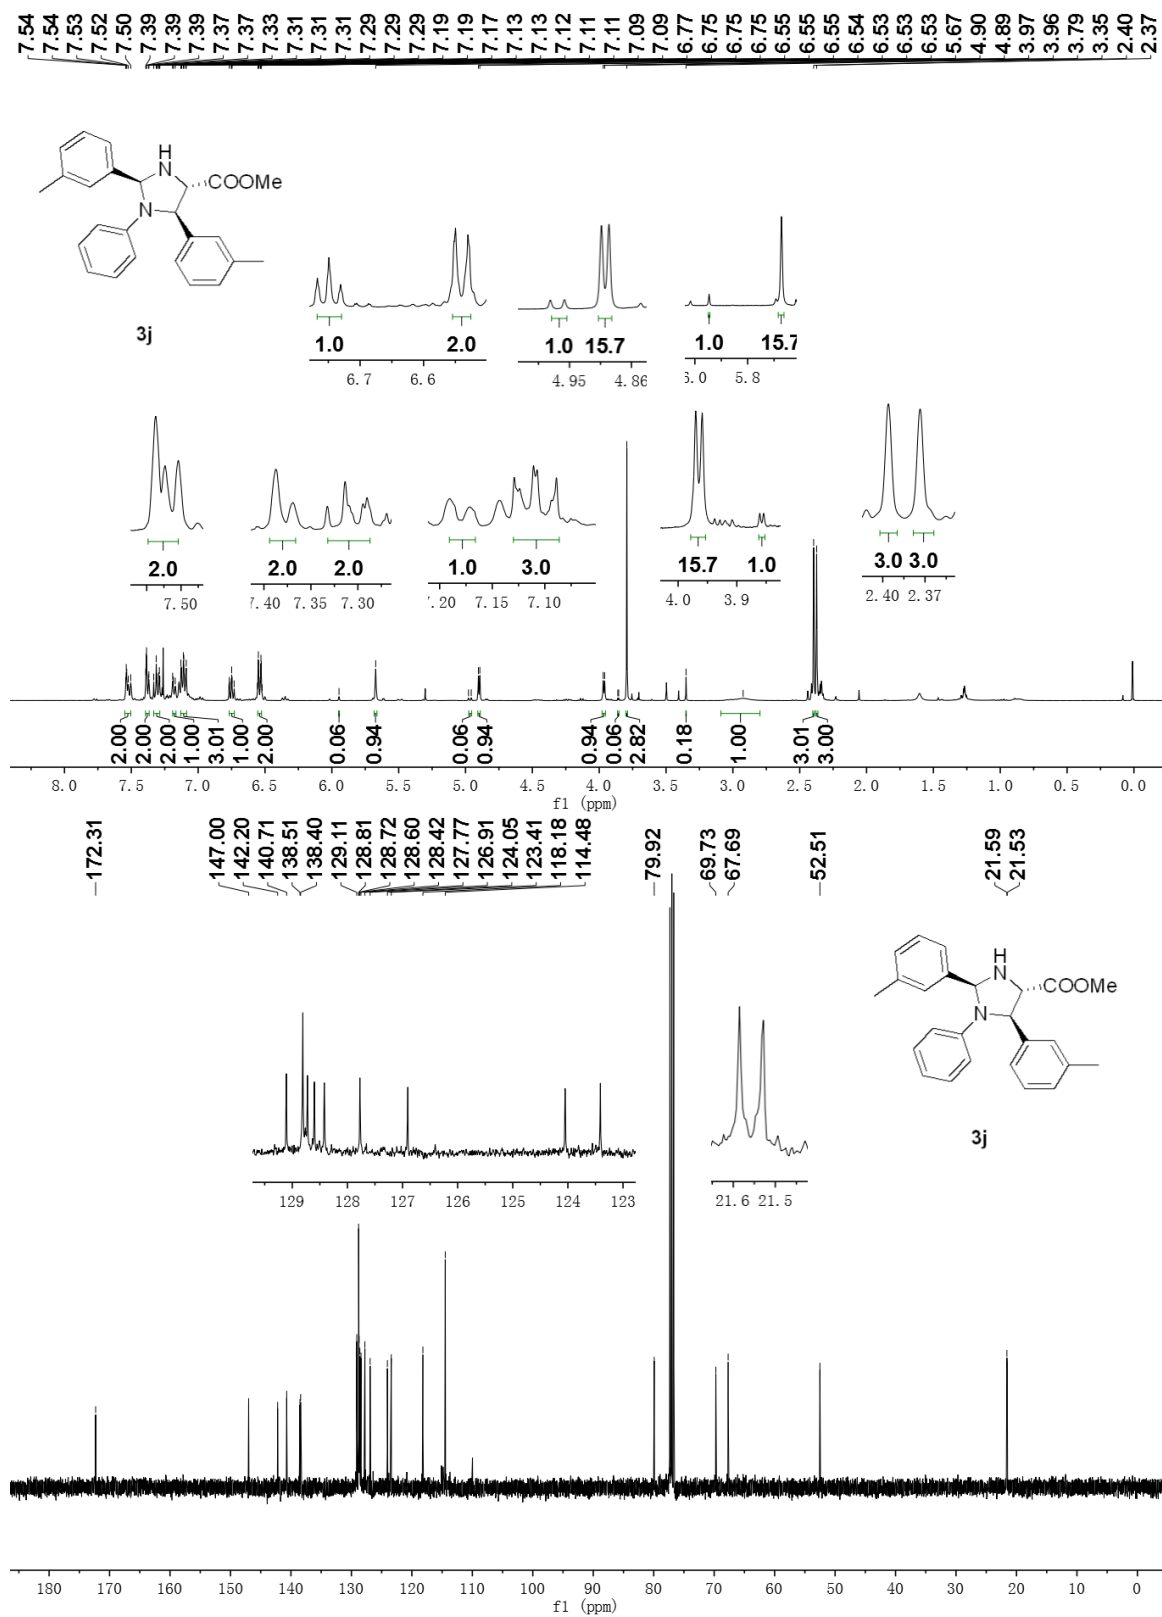



$^1\text{H}$  NMR and  $^{13}\text{C}\{^1\text{H}\}$  NMR spectra of compound of **3k** (procedure A) in  $\text{CDCl}_3$

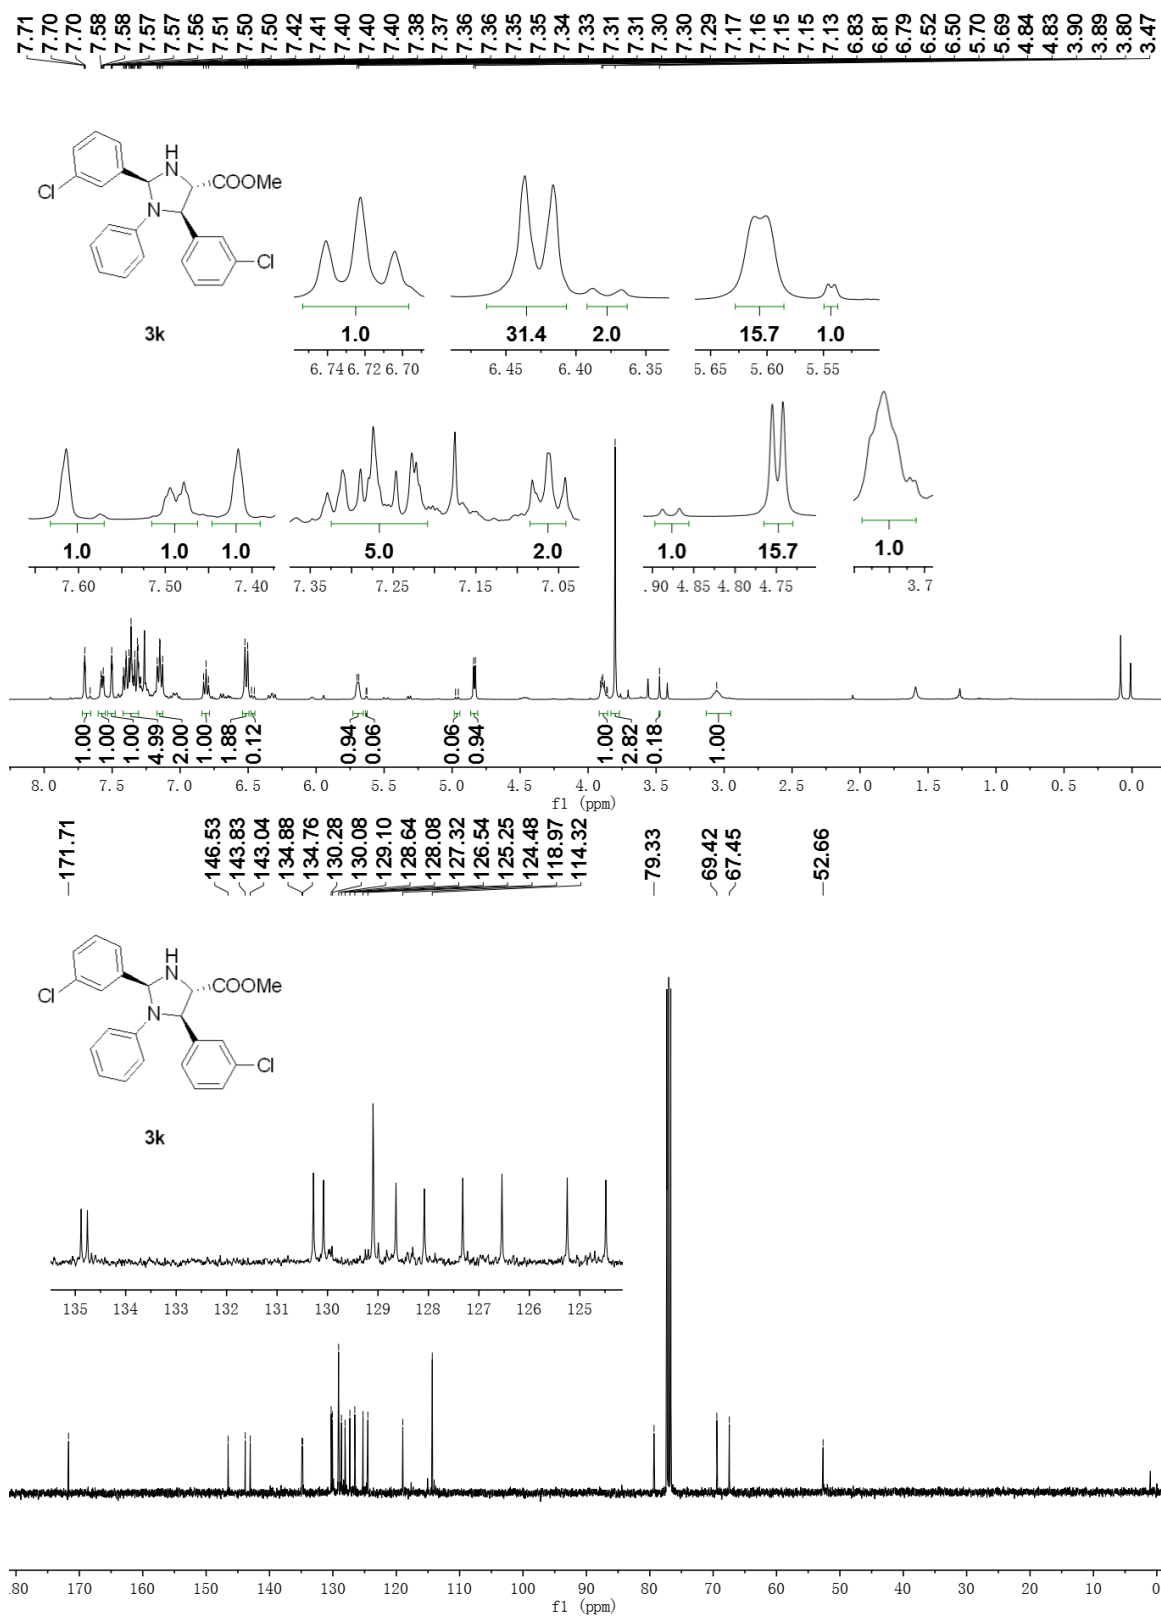

$^1\text{H}$  NMR and  $^{13}\text{C}\{^1\text{H}\}$  NMR spectra of compound of (2*R*,4*R*,5*S*)-**3k** (procedure A) in  $\text{CDCl}_3$

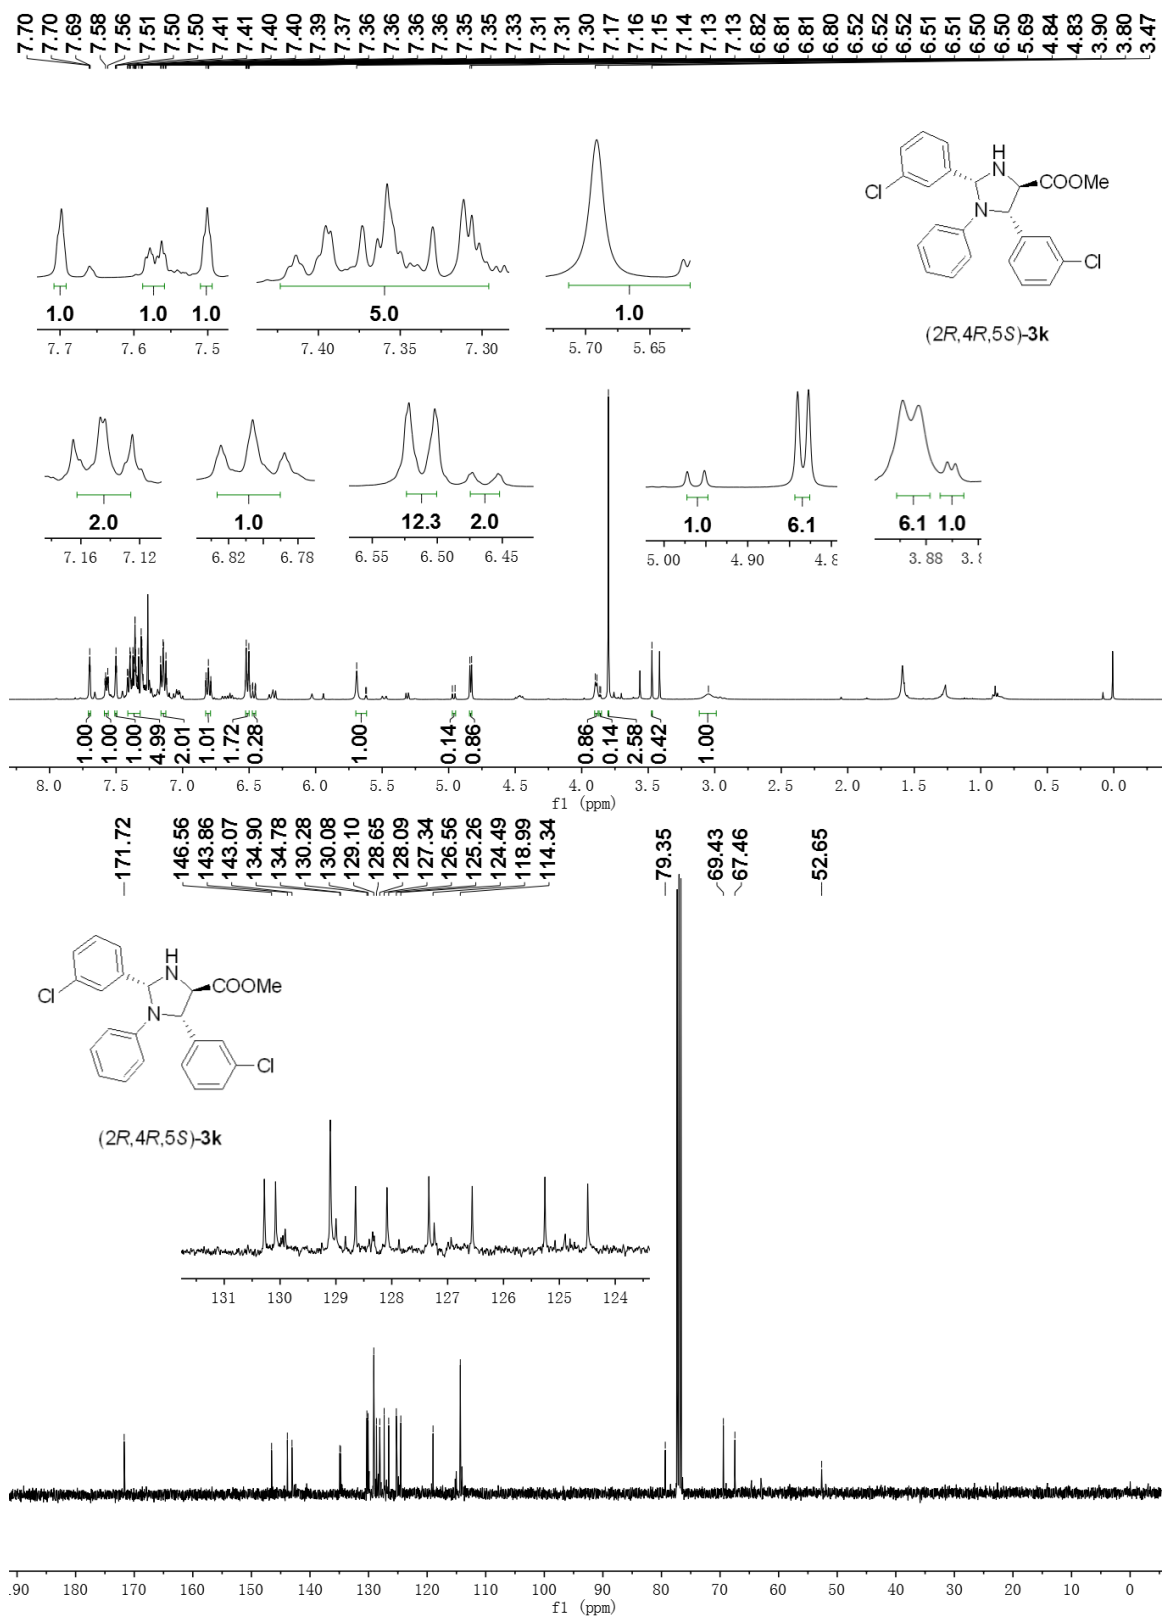

$^1\text{H}$  NMR and  $^{13}\text{C}\{^1\text{H}\}$  NMR spectra of compound of **3I** (procedure A) in  $\text{CDCl}_3$

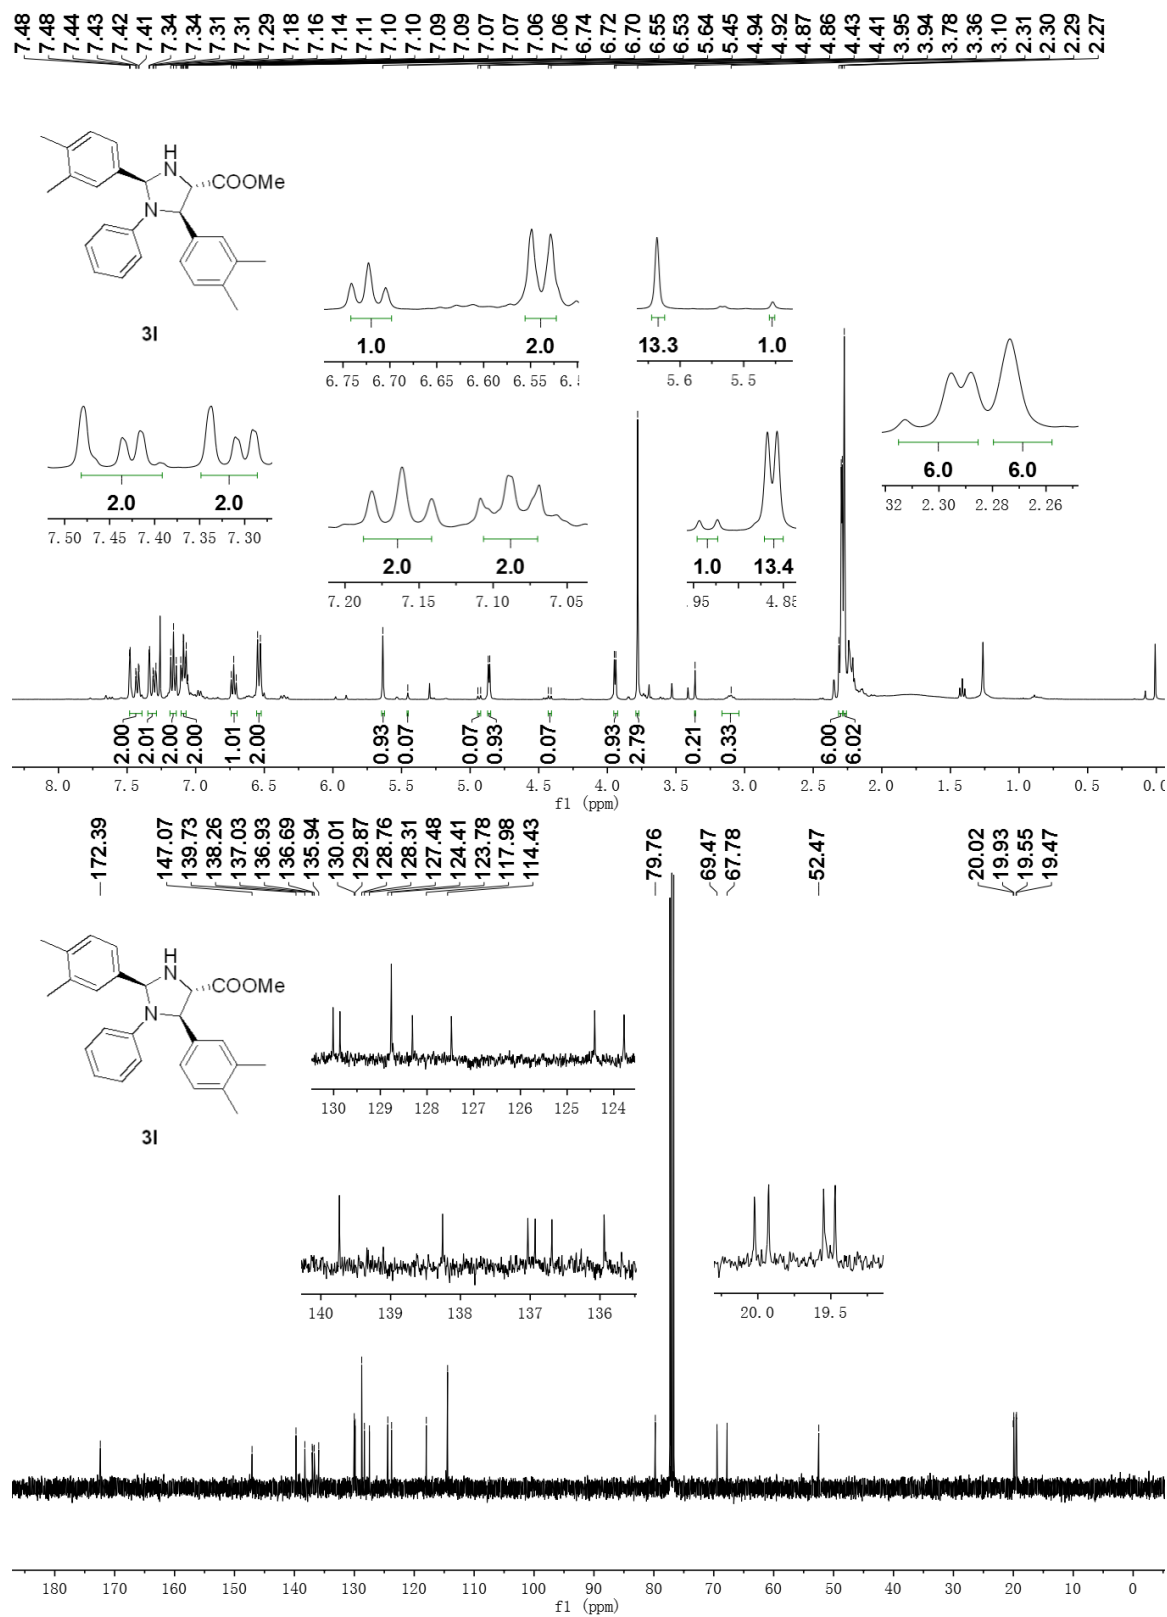

$^1\text{H}$  NMR and  $^{13}\text{C}\{^1\text{H}\}$  NMR spectra of compound of **3m** (procedure A) in  $\text{CDCl}_3$

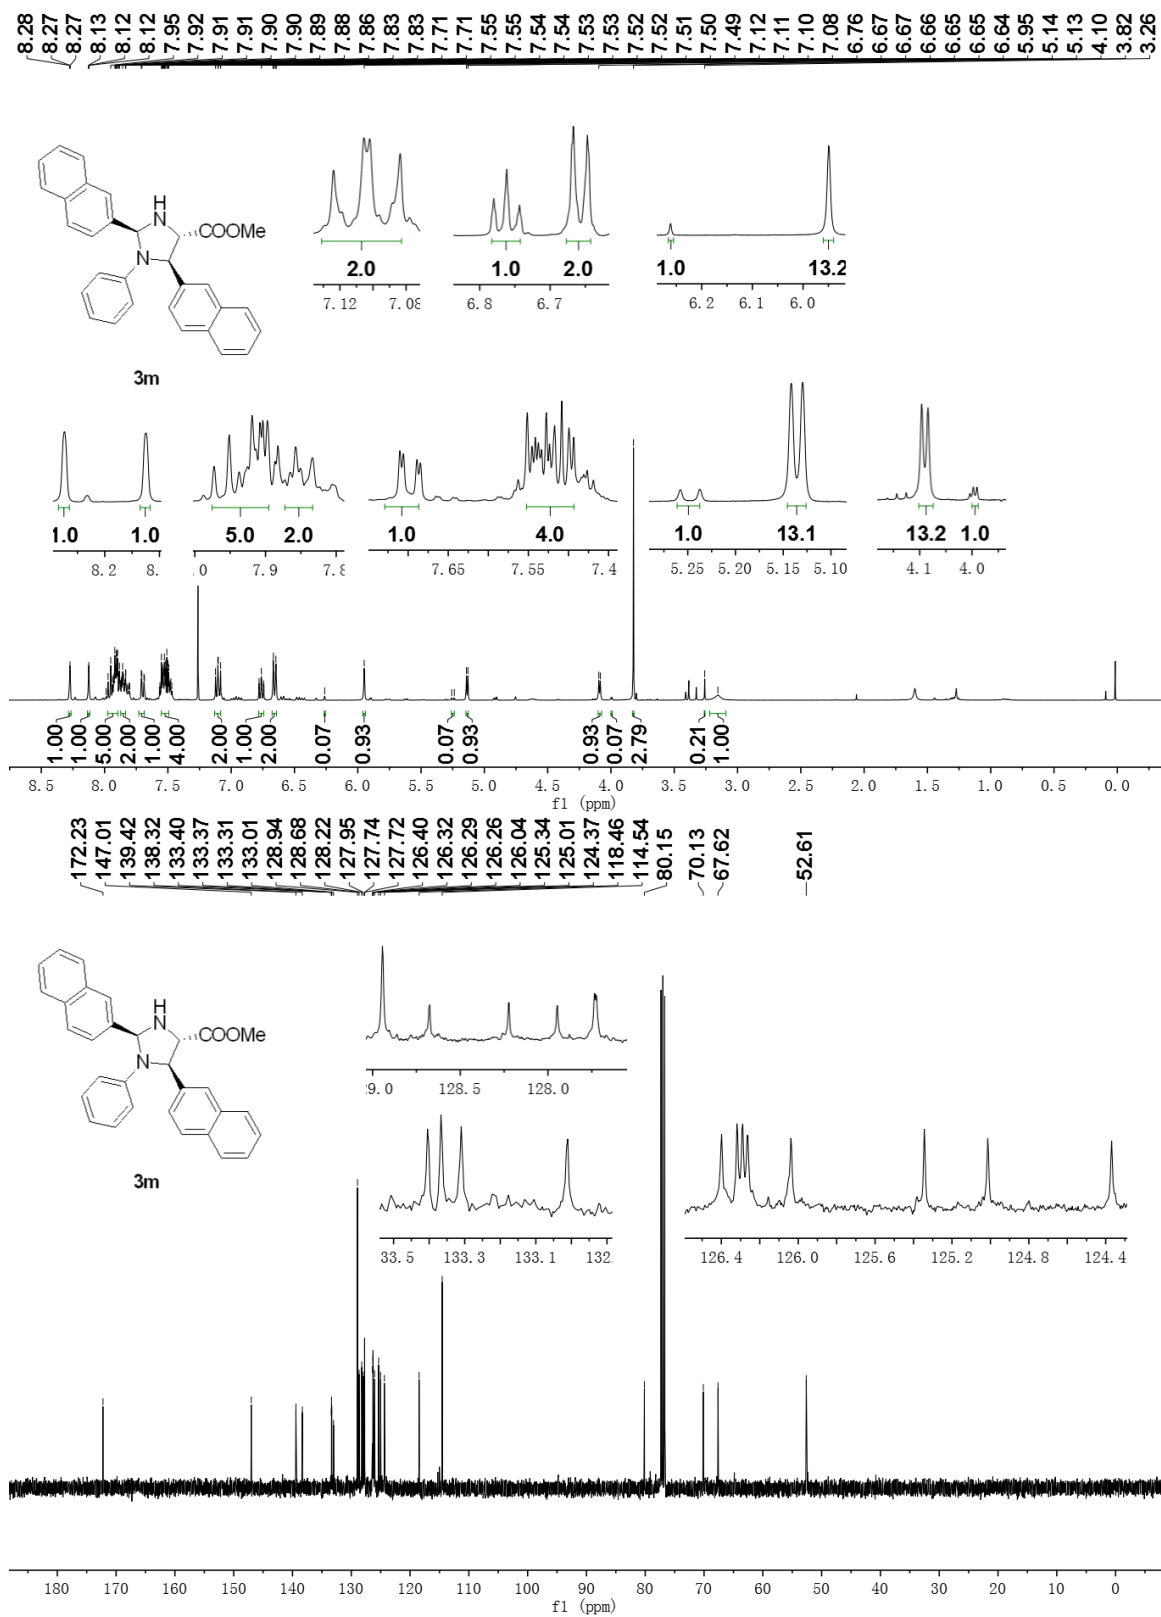

$^1\text{H}$  NMR and  $^{13}\text{C}\{^1\text{H}\}$  NMR spectra of compound of **3n** (procedure A) in  $\text{CDCl}_3$

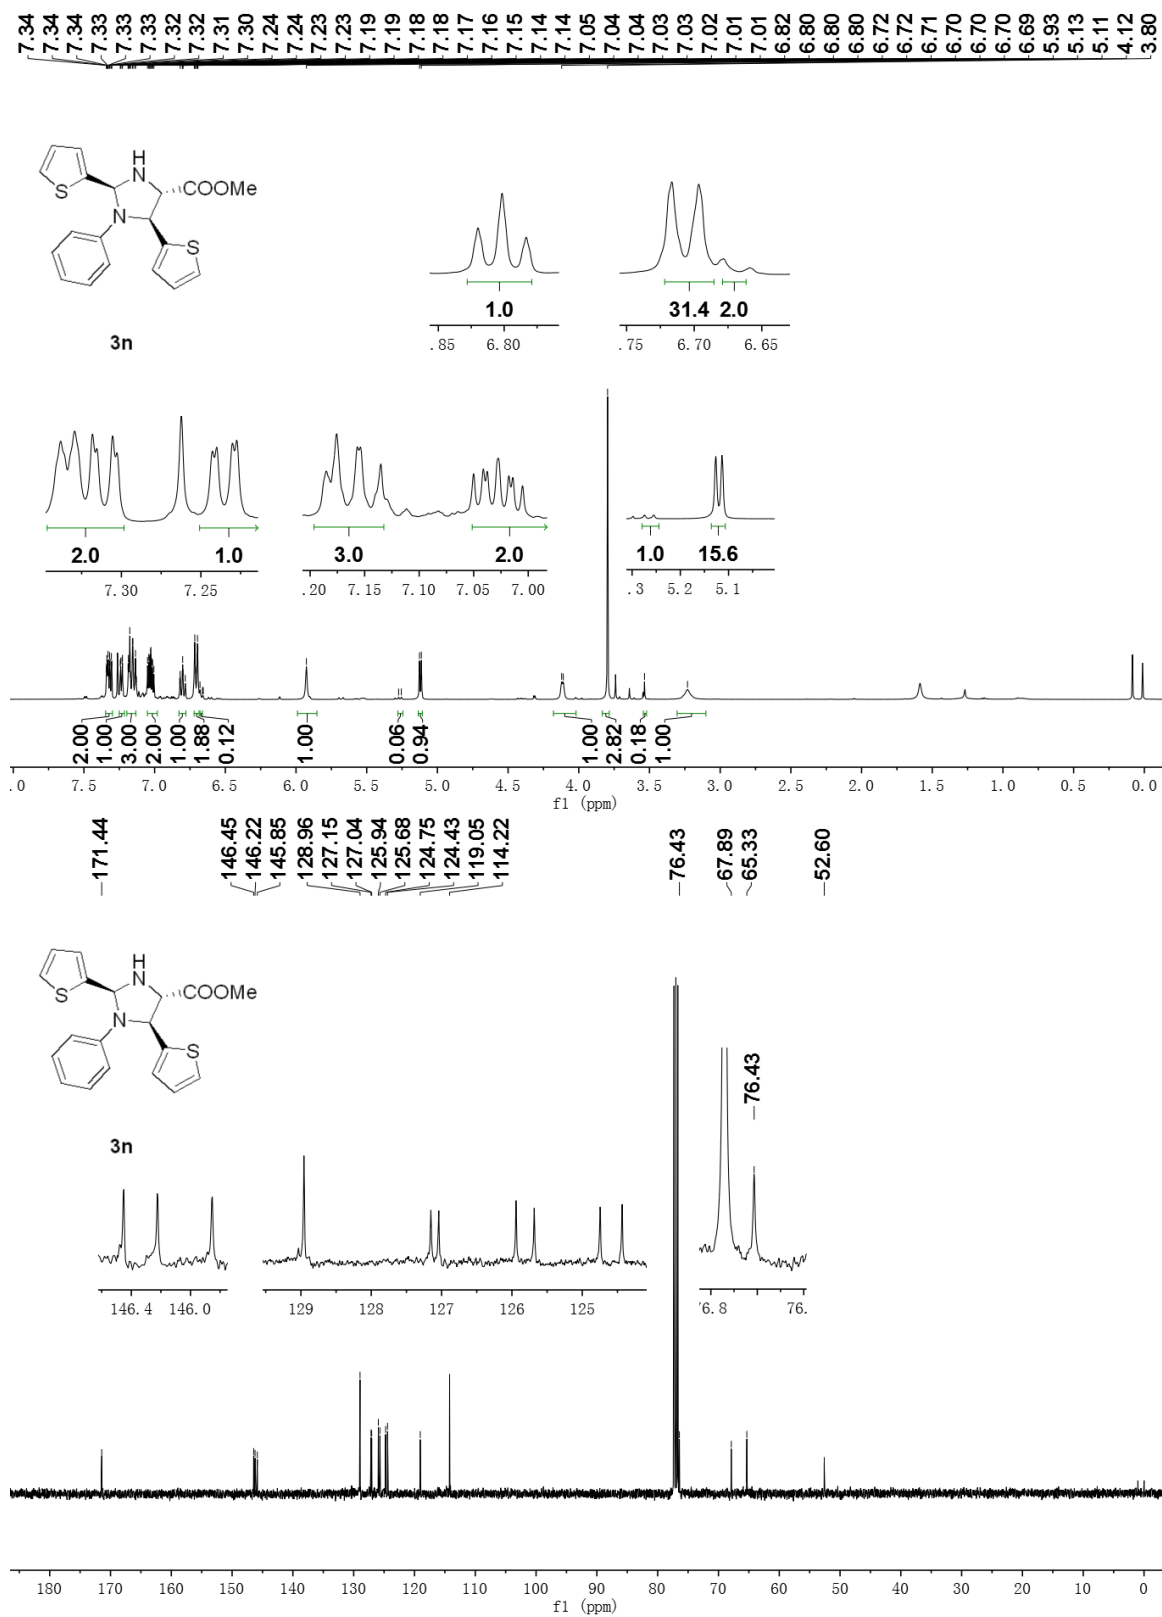

$^1\text{H}$  NMR and  $^{13}\text{C}\{^1\text{H}\}$  NMR spectra of compound of (2*R*,4*R*,5*R*)-**3n** (procedure A) in  $\text{CDCl}_3$

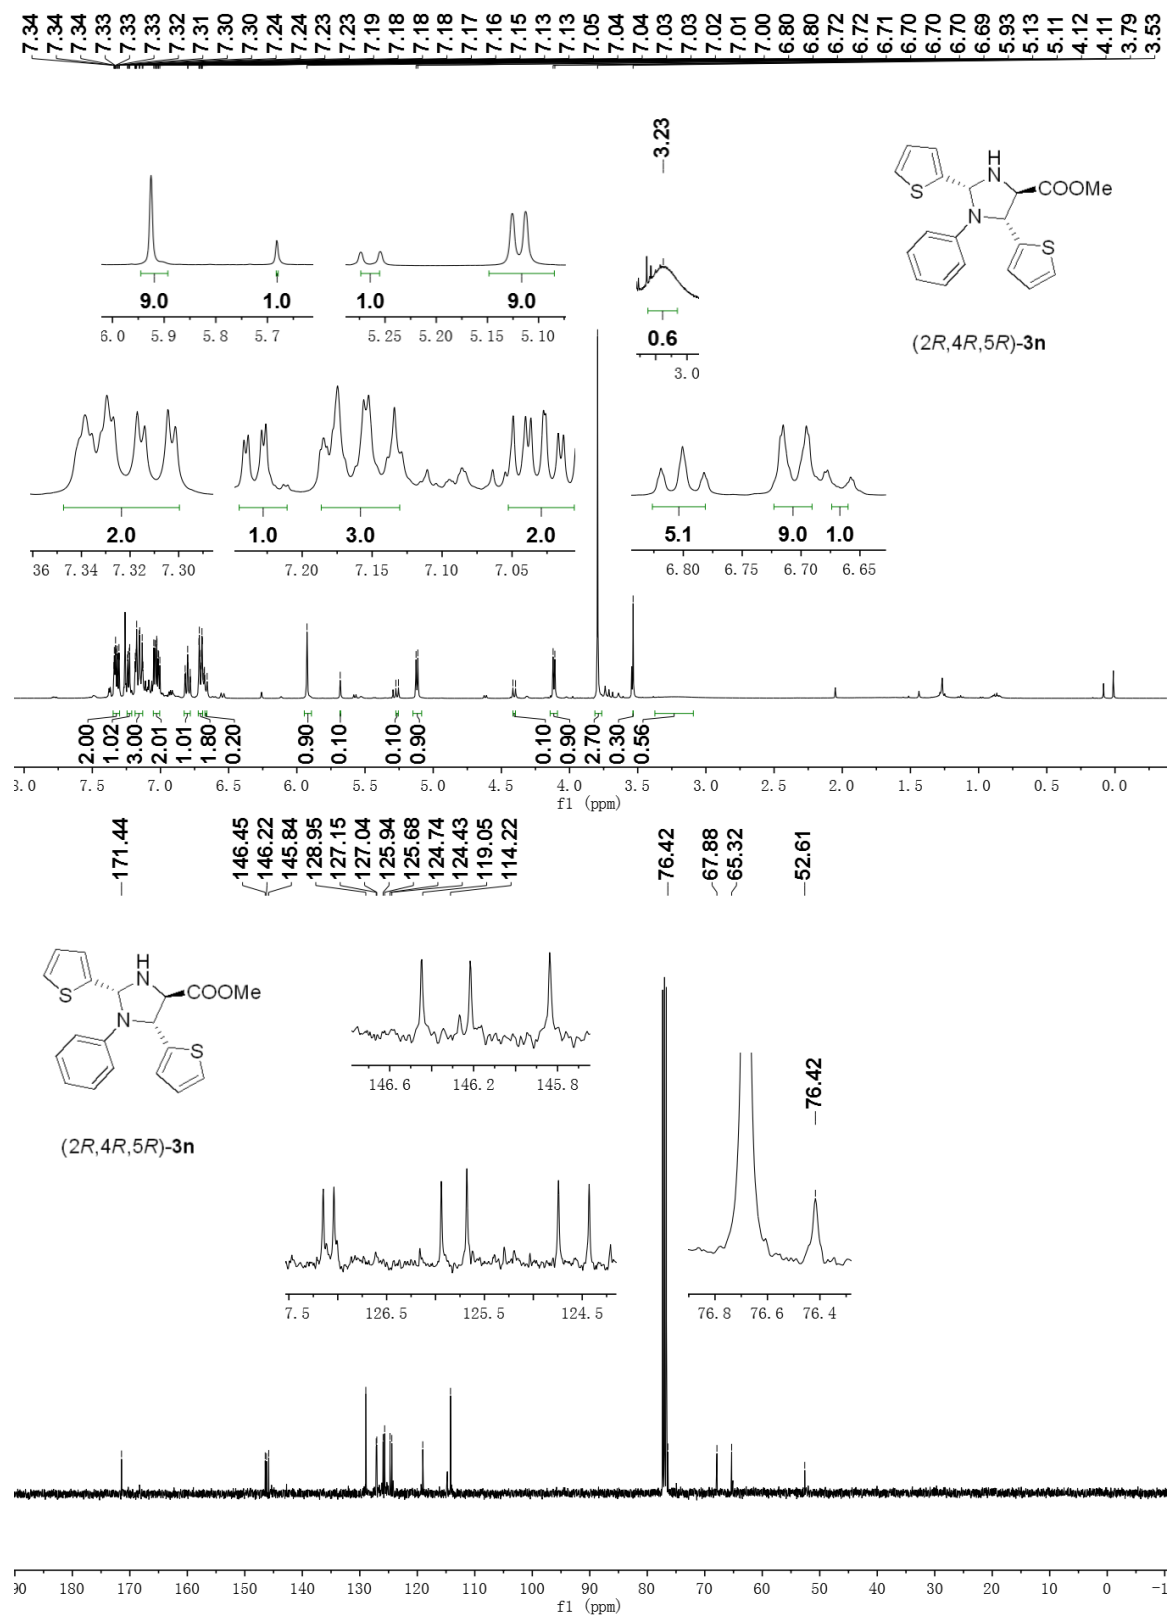

$^1\text{H}$  NMR and  $^{13}\text{C}\{^1\text{H}\}$  NMR spectra of compound of **3o** (procedure A) in  $\text{CDCl}_3$

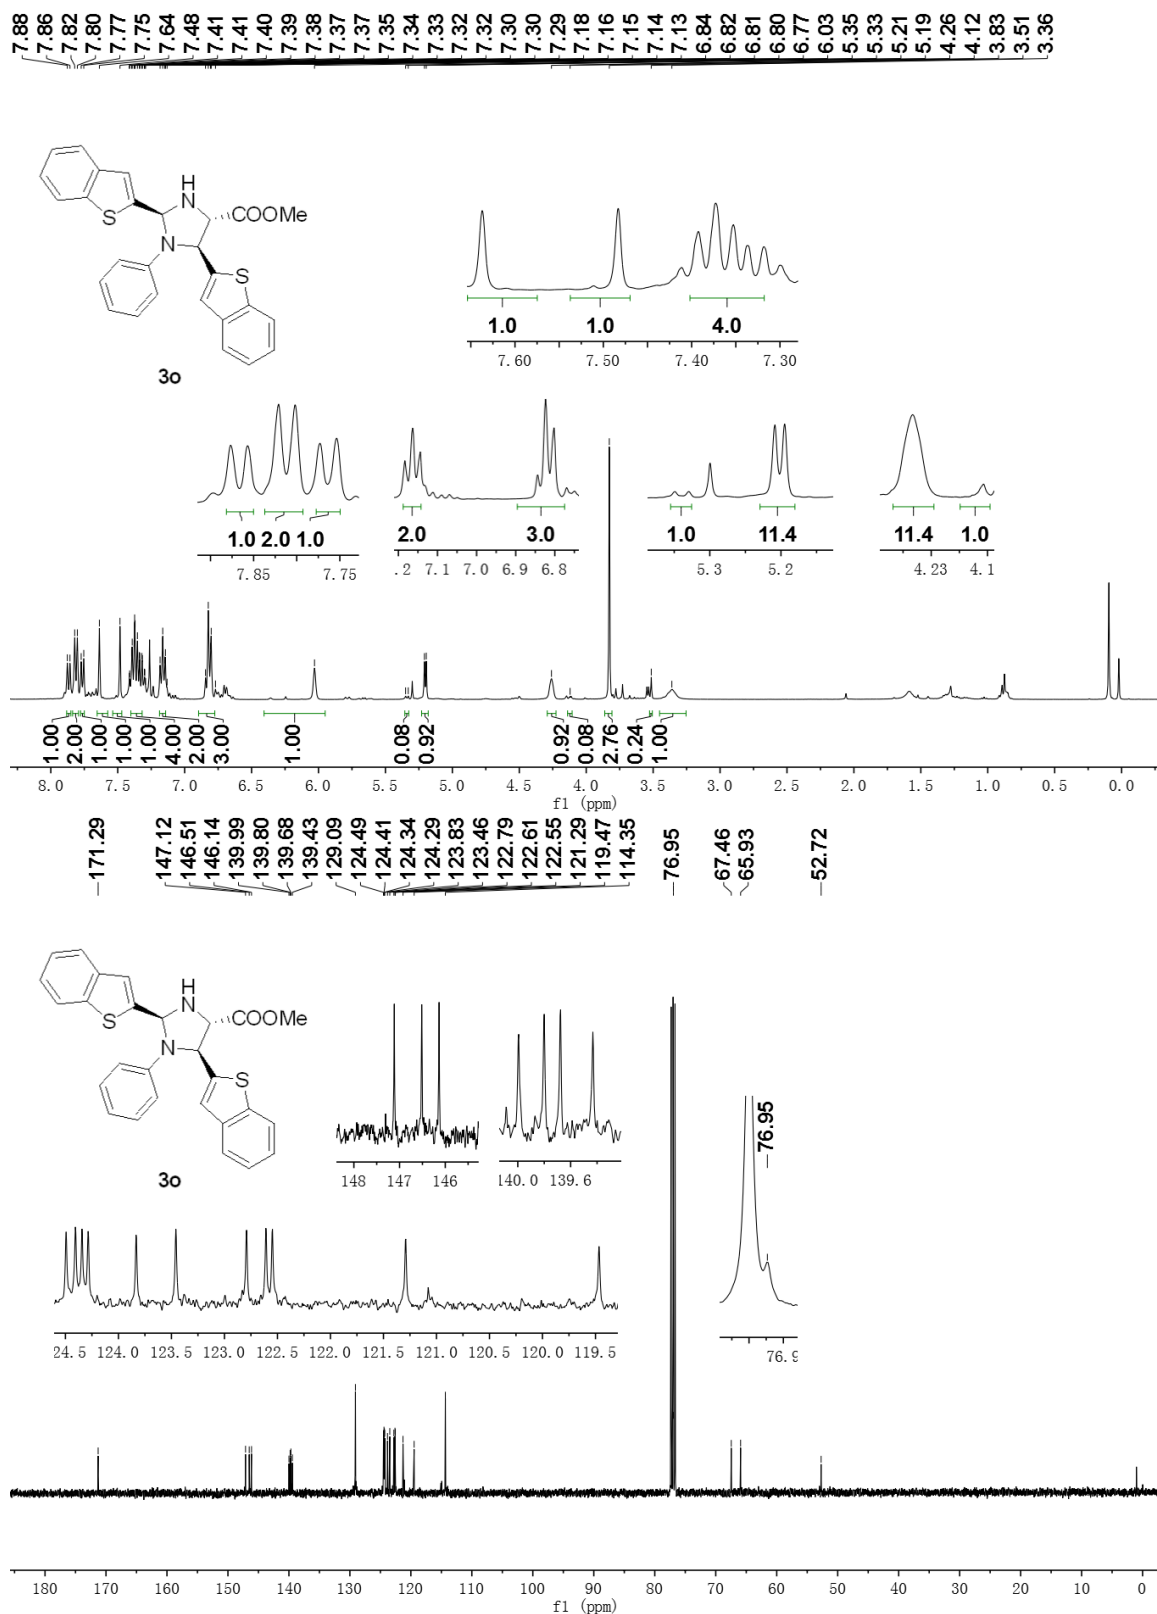

$^1\text{H}$  NMR and  $^{13}\text{C}\{^1\text{H}\}$  NMR spectra of compound of (2*R*,4*R*,5*R*)-**3o** (procedure A) in  $\text{CDCl}_3$

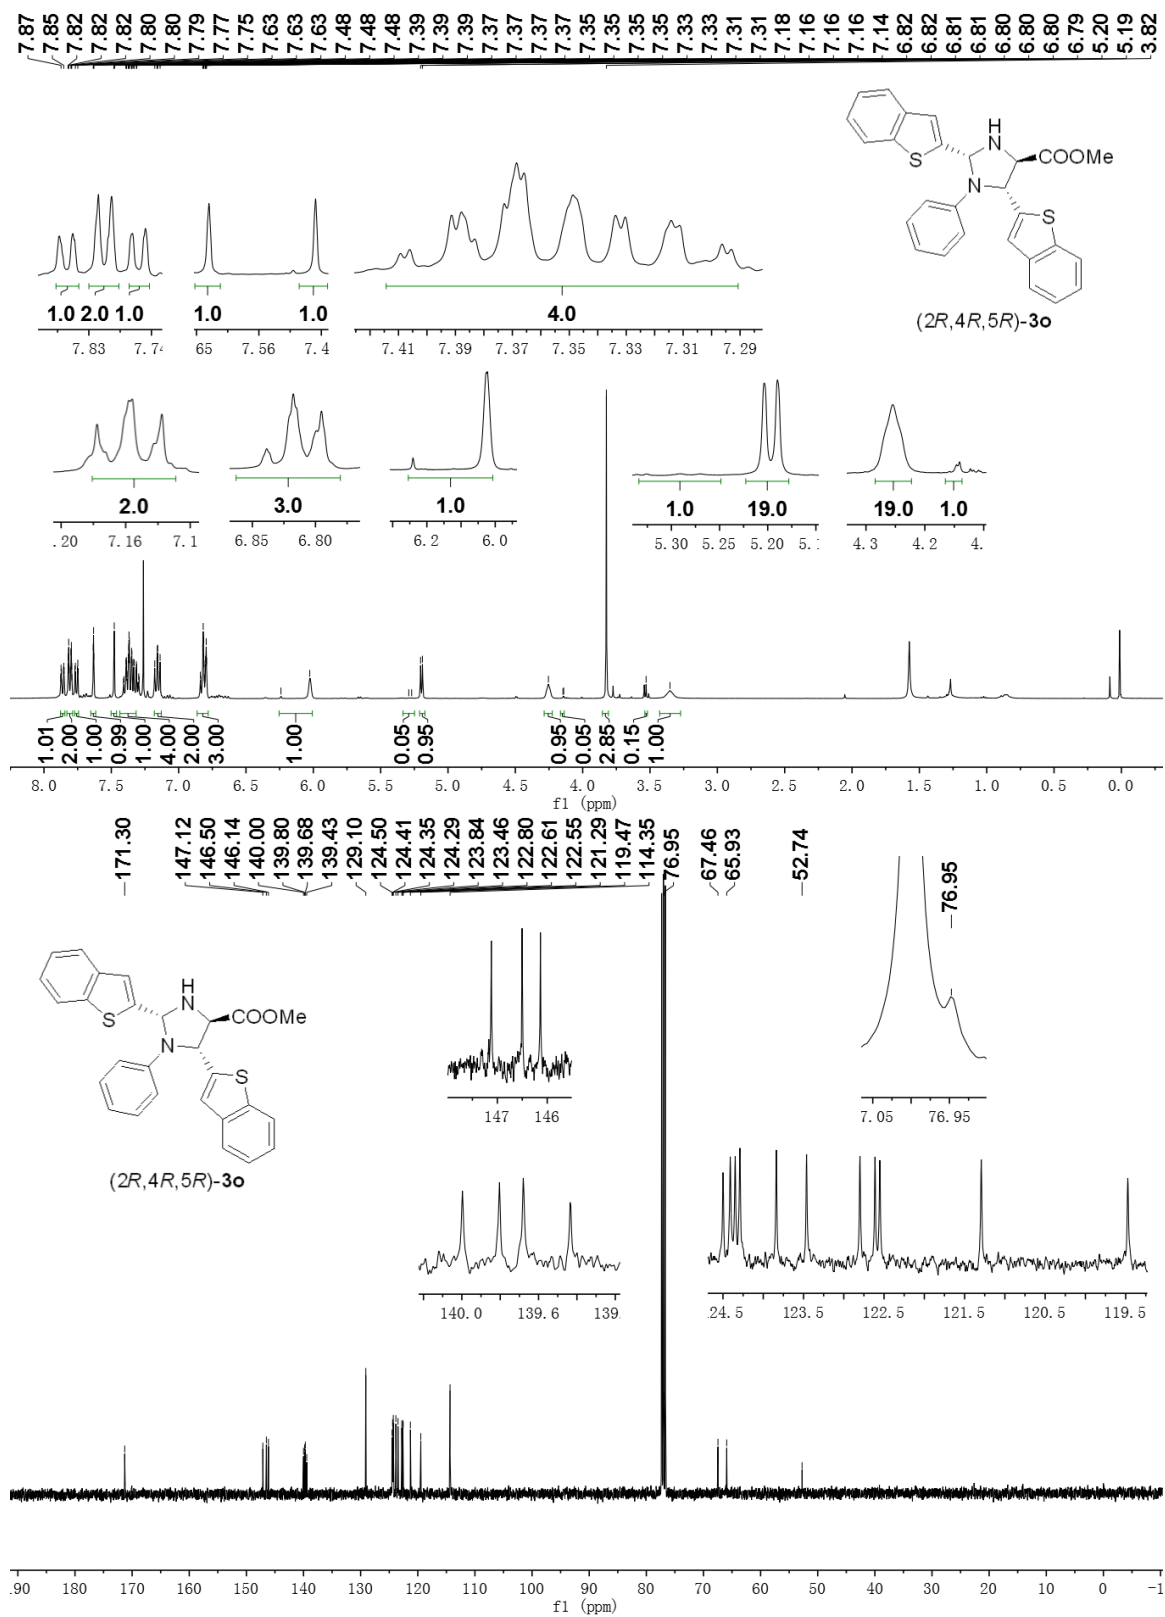



$^1\text{H}$  NMR and  $^{13}\text{C}\{^1\text{H}\}$  NMR spectra of compound of **3p** (procedure A) in  $\text{CDCl}_3$

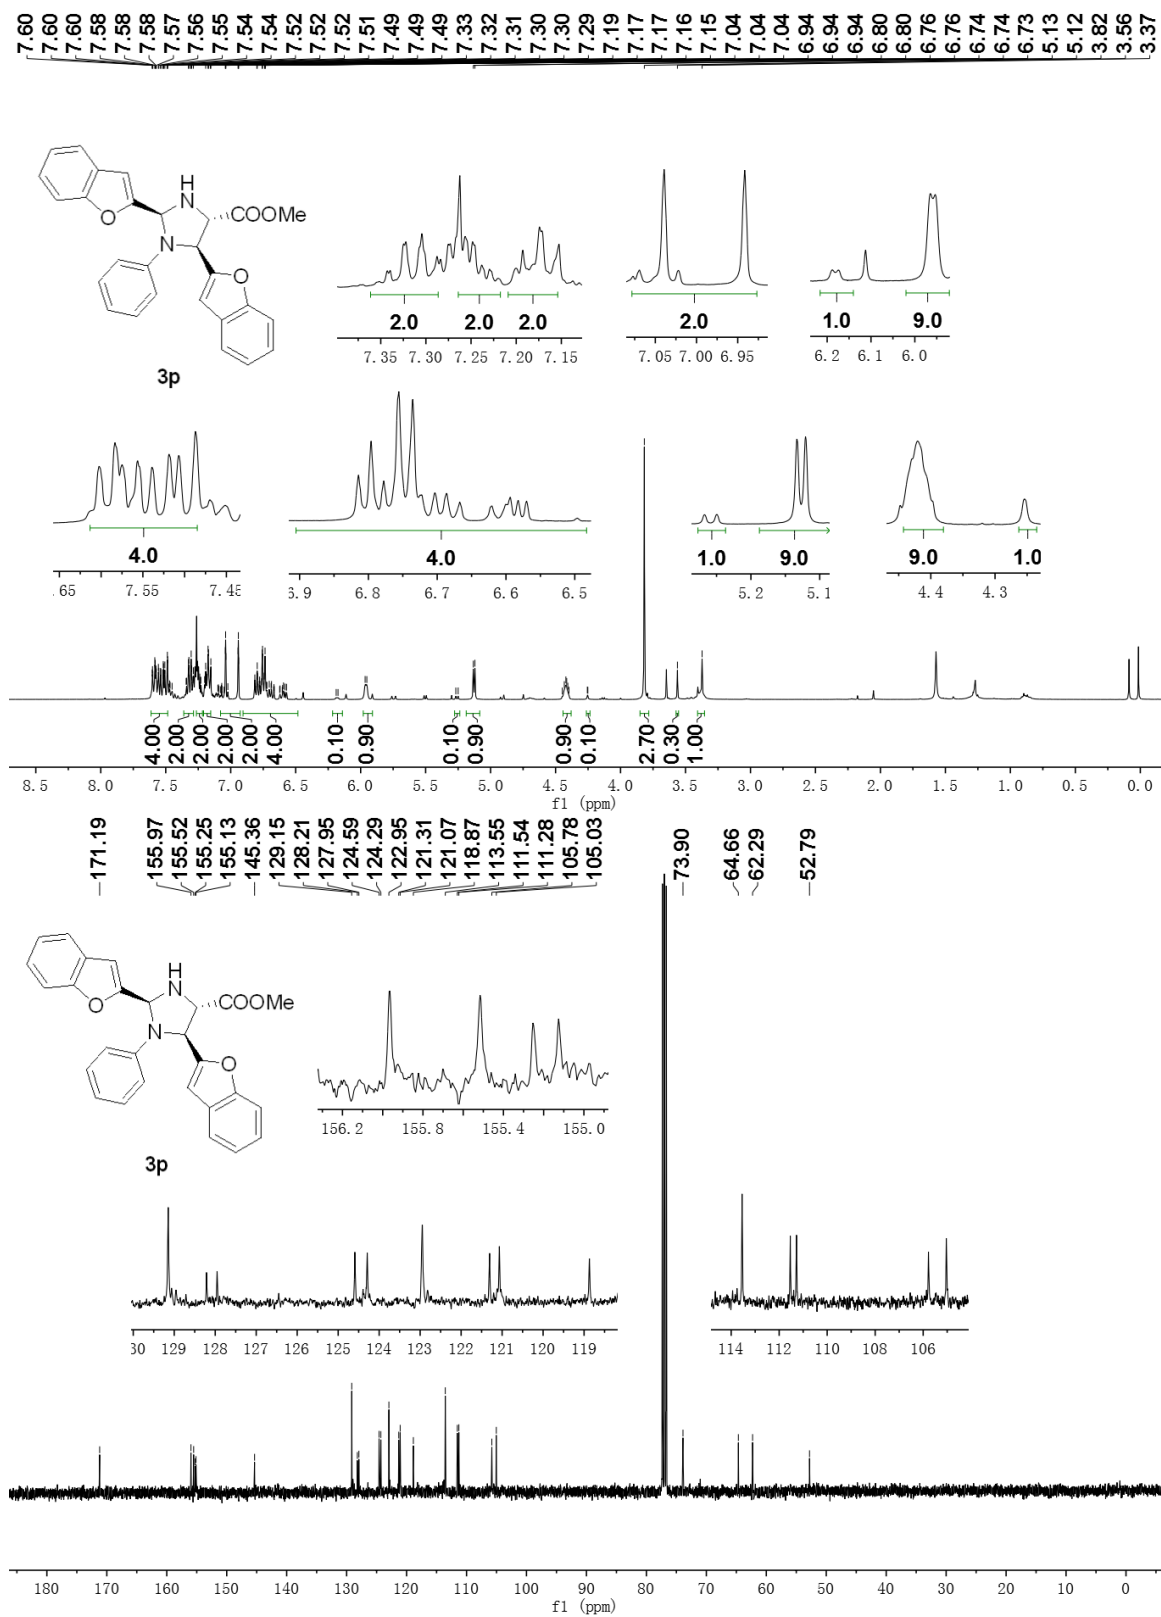

$^1\text{H}$  NMR and  $^{13}\text{C}\{^1\text{H}\}$  NMR spectra of compound of **3q** (procedure A) in  $\text{CDCl}_3$

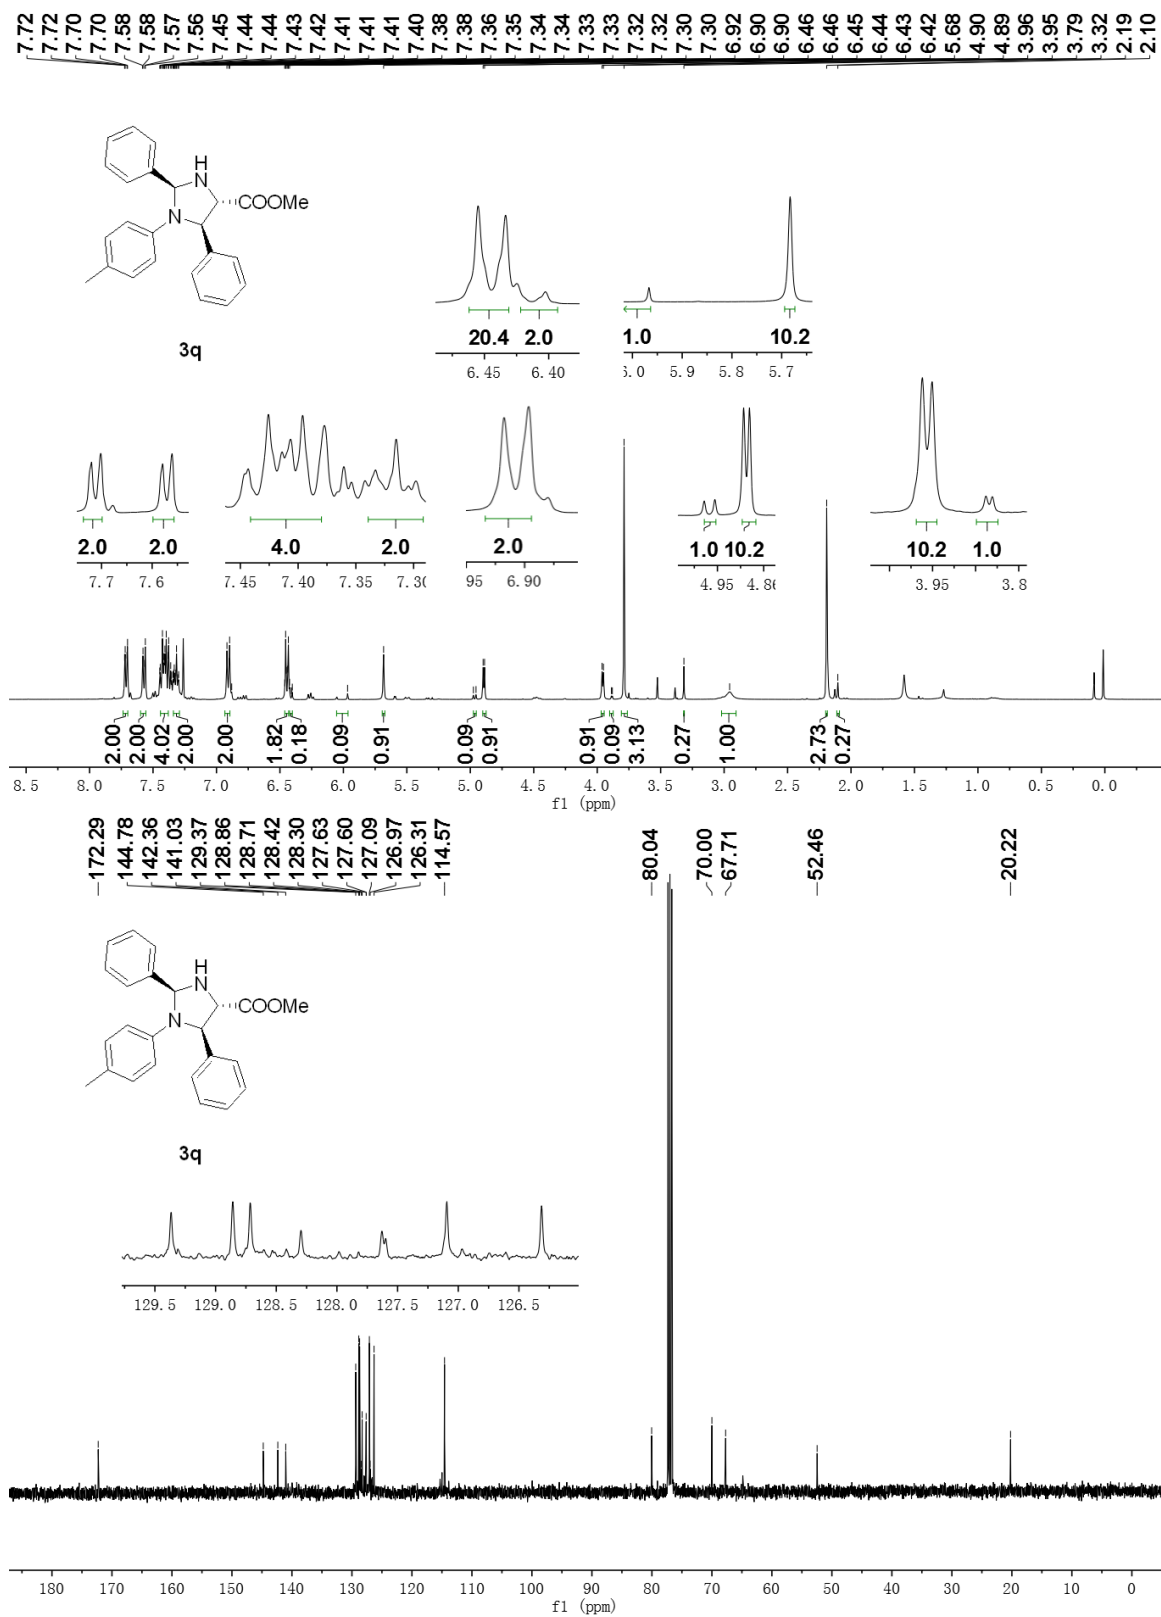

$^1\text{H}$  NMR and  $^{13}\text{C}\{^1\text{H}\}$  NMR spectra of compound of **3q** (procedure B) in  $\text{CDCl}_3$

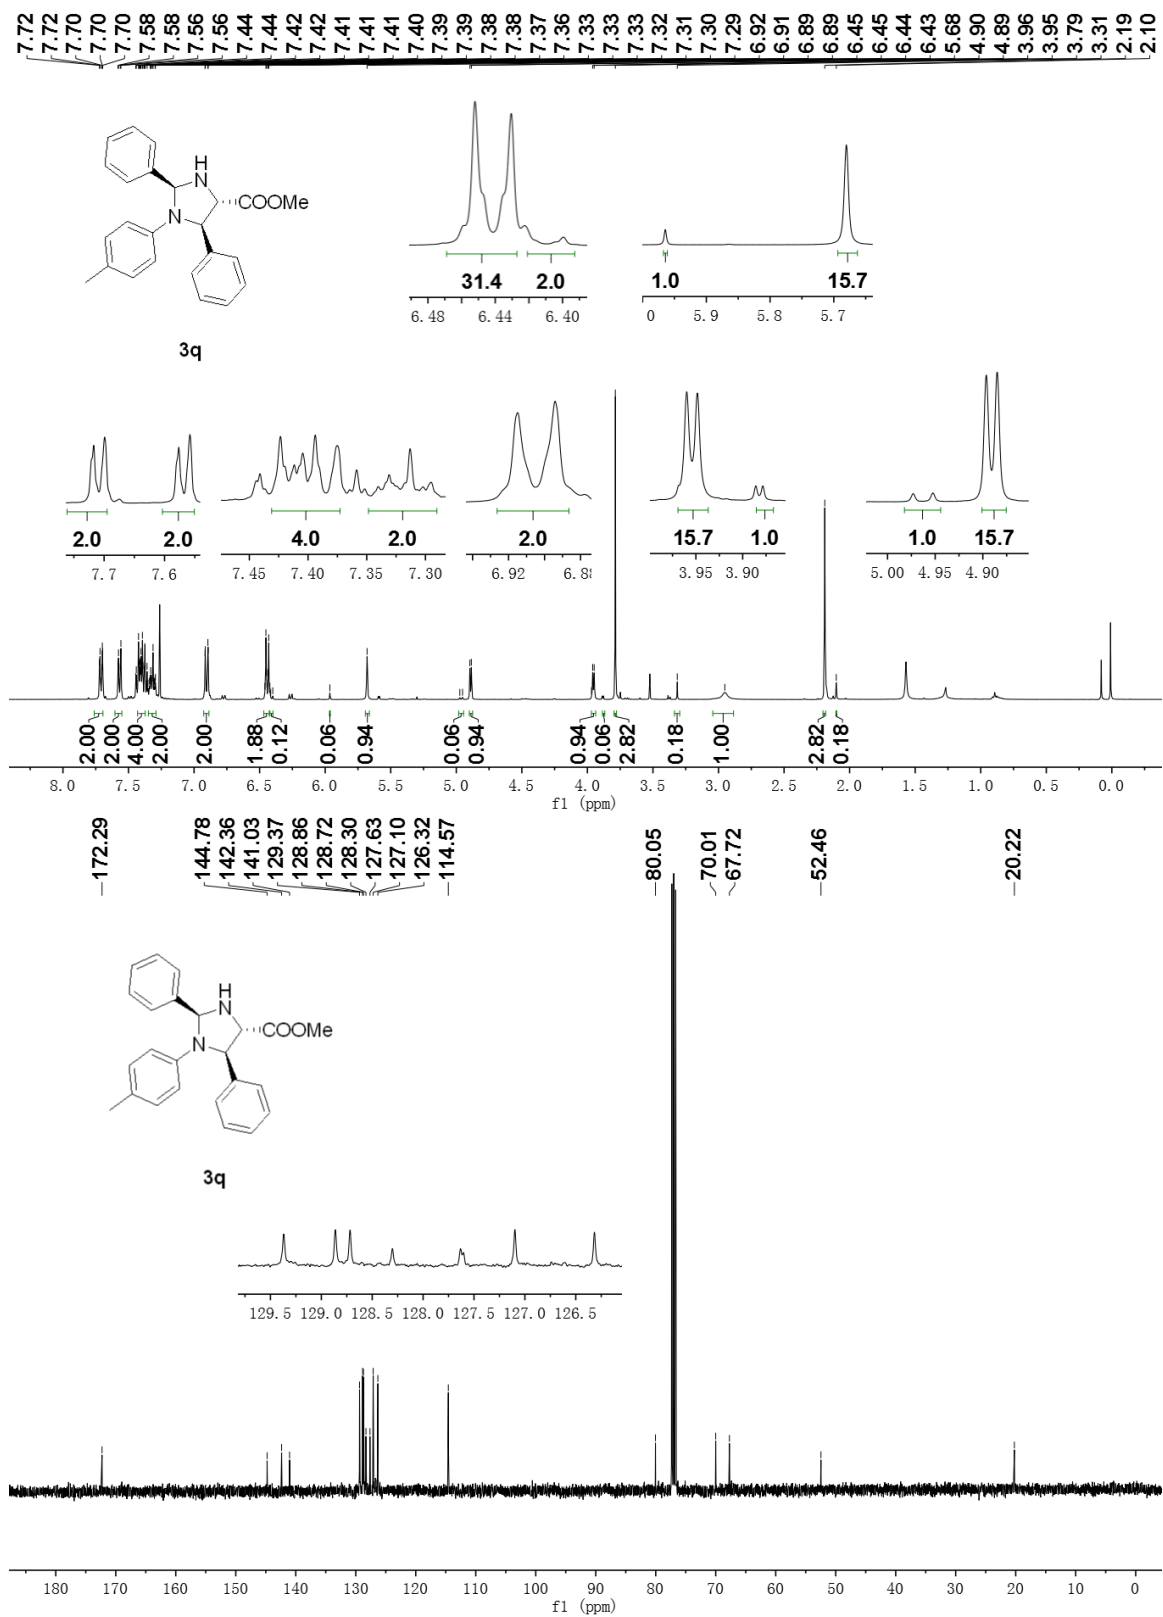

$^1\text{H}$  NMR and  $^{13}\text{C}\{^1\text{H}\}$  NMR spectra of compound of **3r** (procedure A) in  $\text{d}_6$ -Acetone

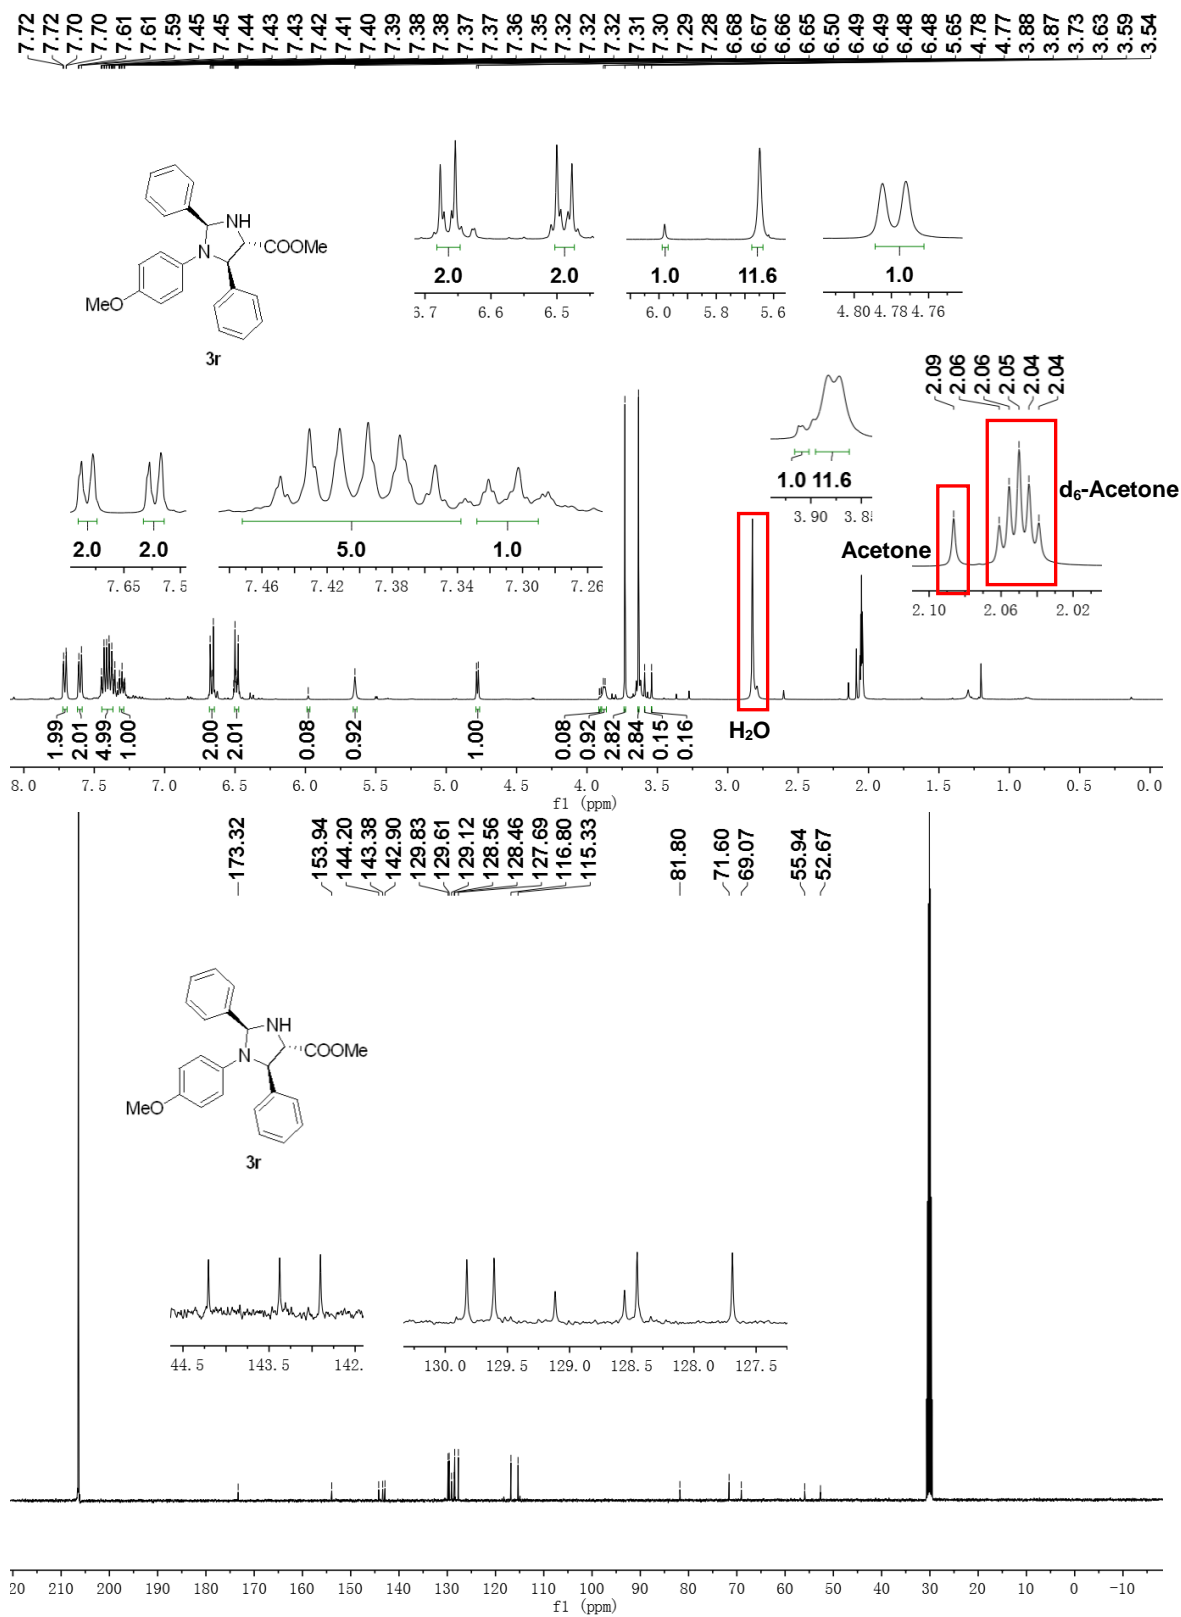

$^1\text{H}$  NMR and  $^{13}\text{C}\{^1\text{H}\}$  NMR spectra of compound of **3s** (procedure A) in  $\text{CDCl}_3$

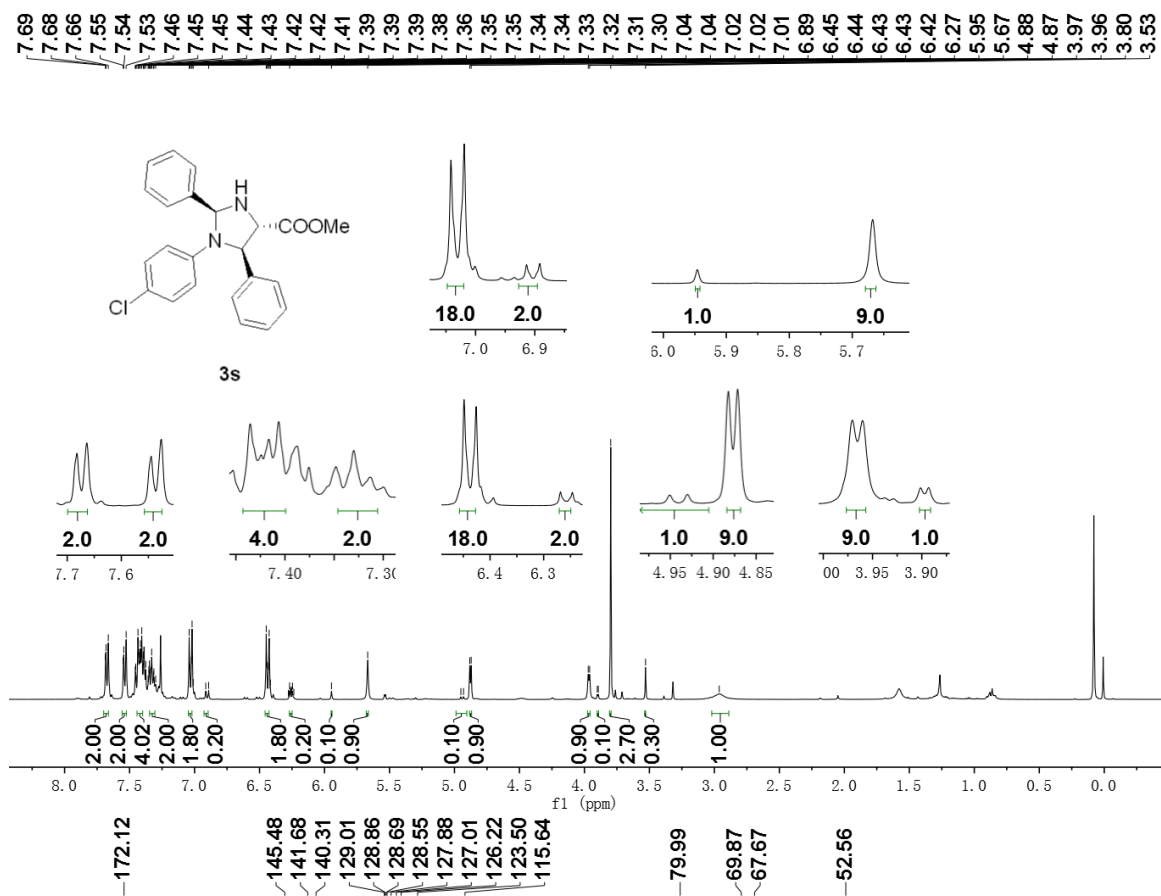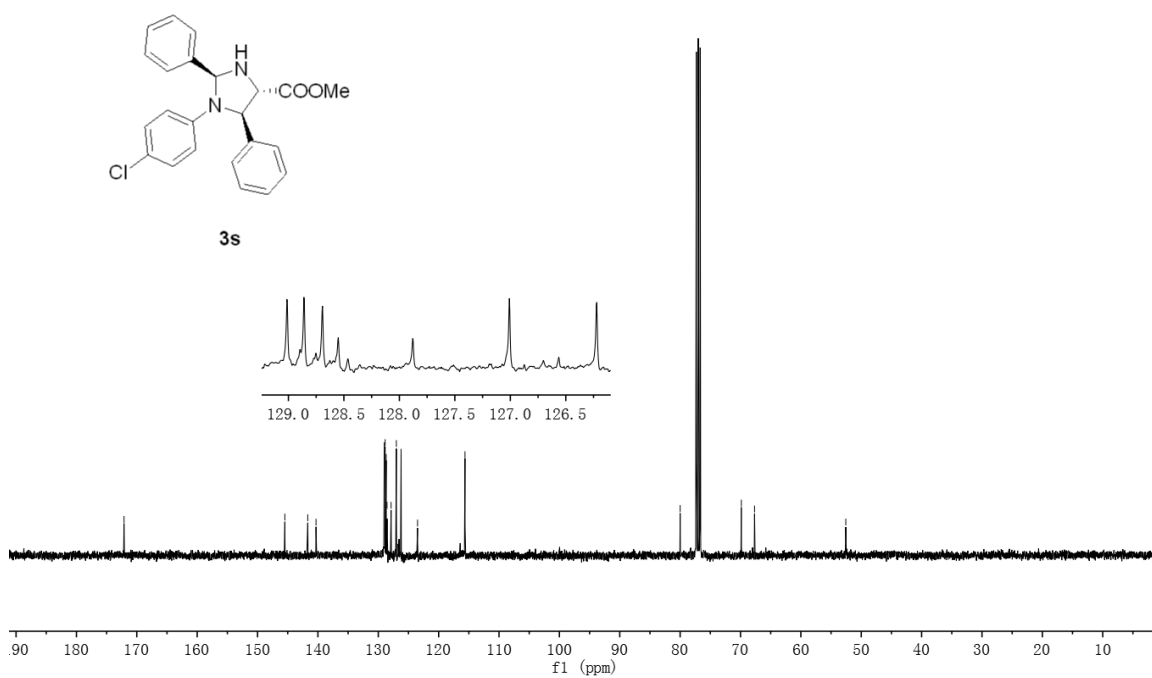

$^1\text{H}$  NMR and  $^{13}\text{C}\{^1\text{H}\}$  NMR spectra of compound of **3s** (procedure B) in  $\text{CDCl}_3$

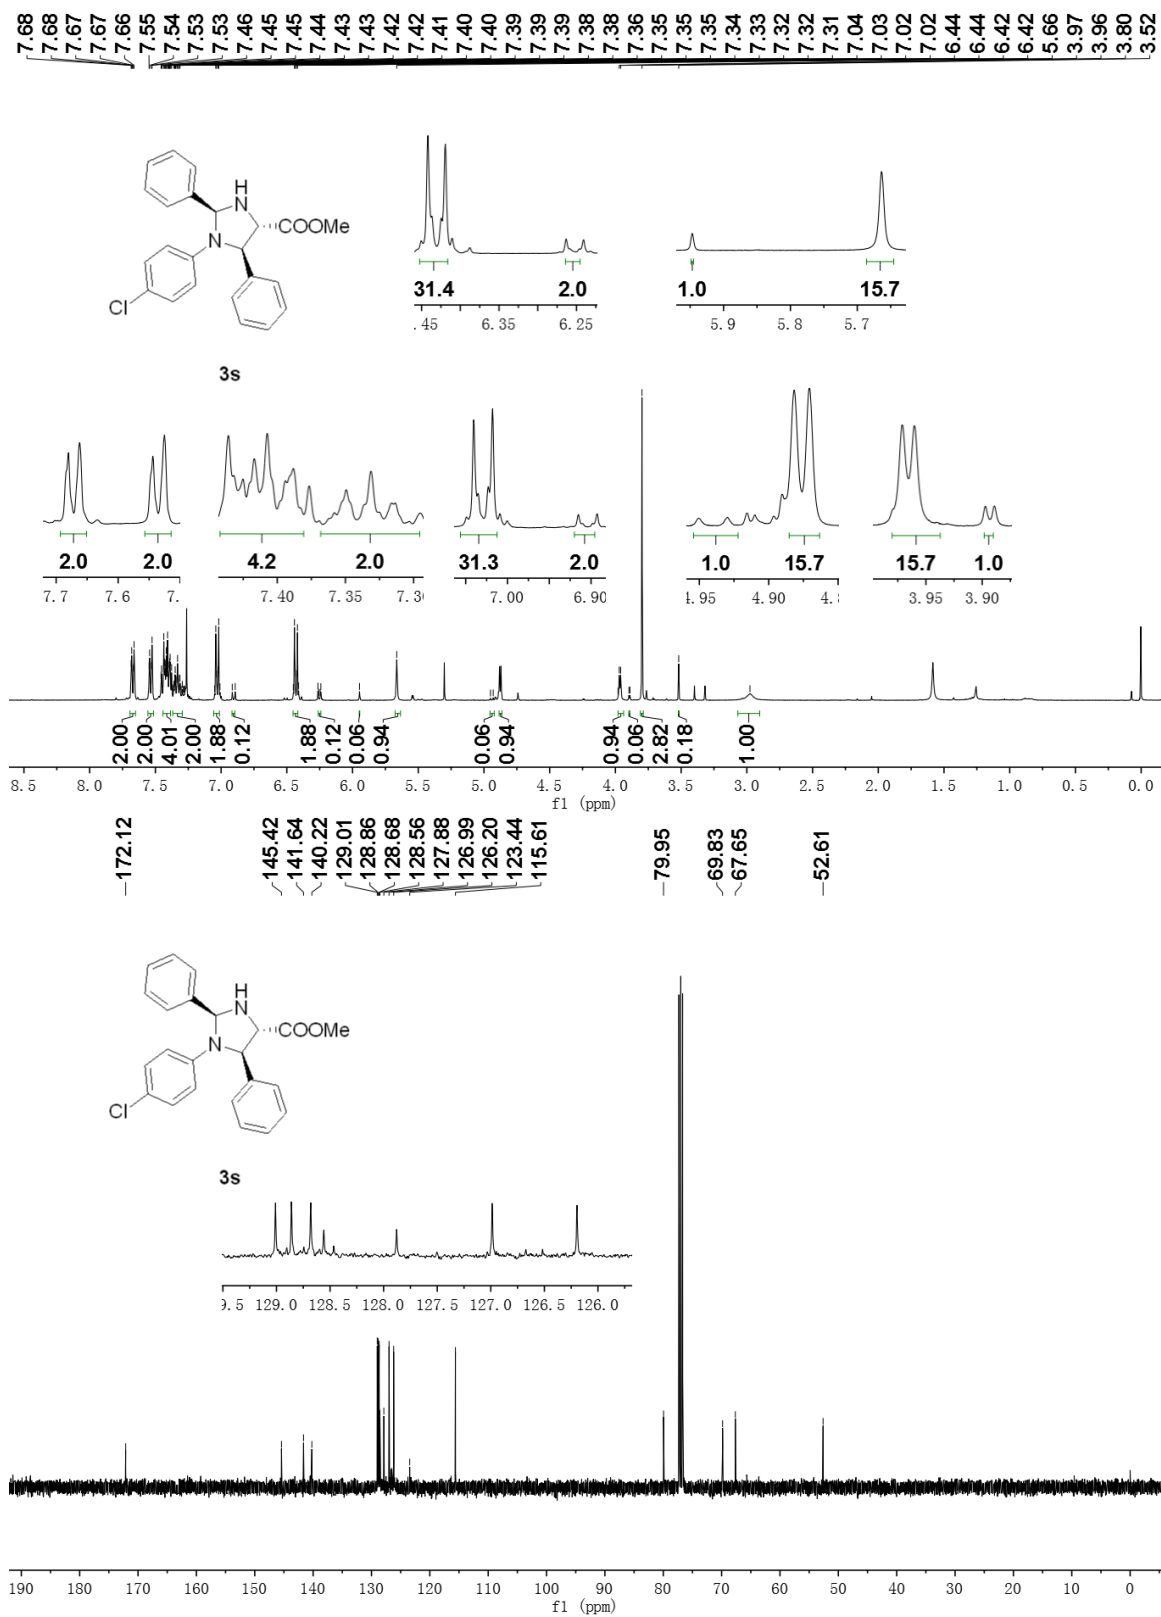

$^1\text{H}$  NMR and  $^{13}\text{C}\{^1\text{H}\}$  NMR spectra of compound of **3t** (procedure A) in  $\text{CDCl}_3$

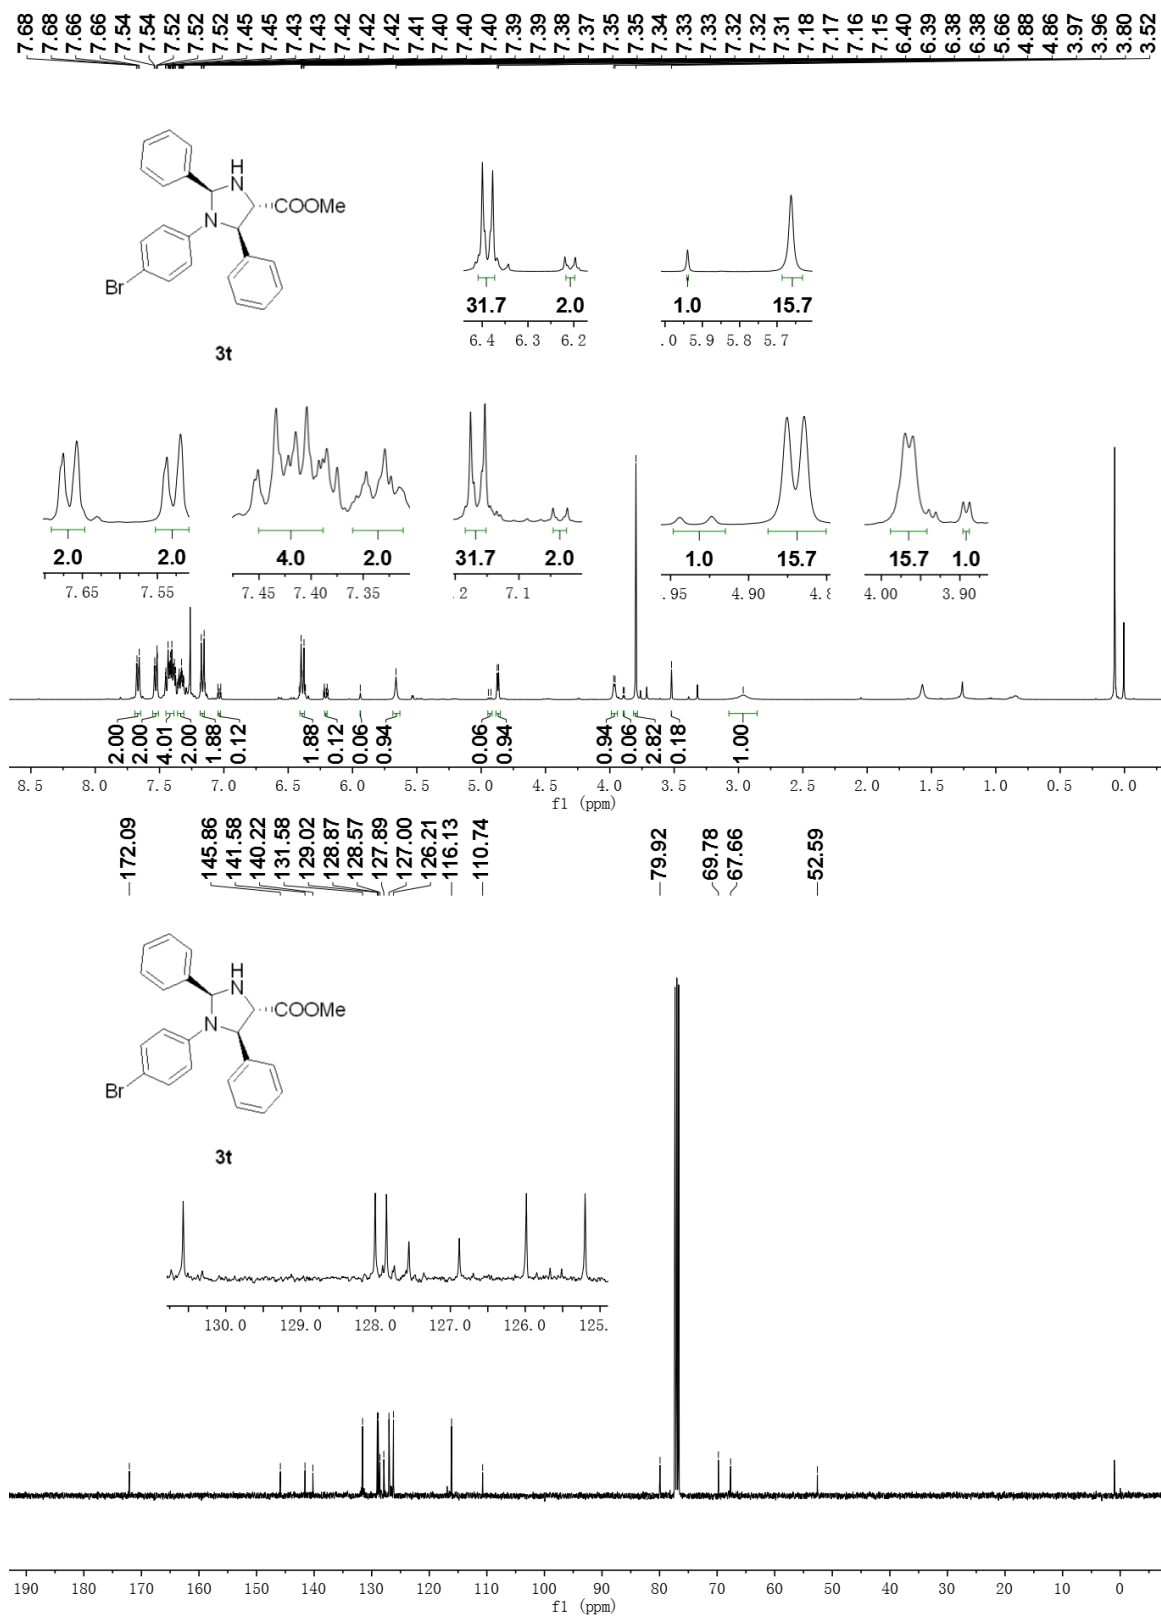

$^1\text{H}$  NMR and  $^{13}\text{C}\{^1\text{H}\}$  NMR spectra of compound of (2*R*,4*R*,5*S*)-3t (procedure A) in  $\text{CDCl}_3$

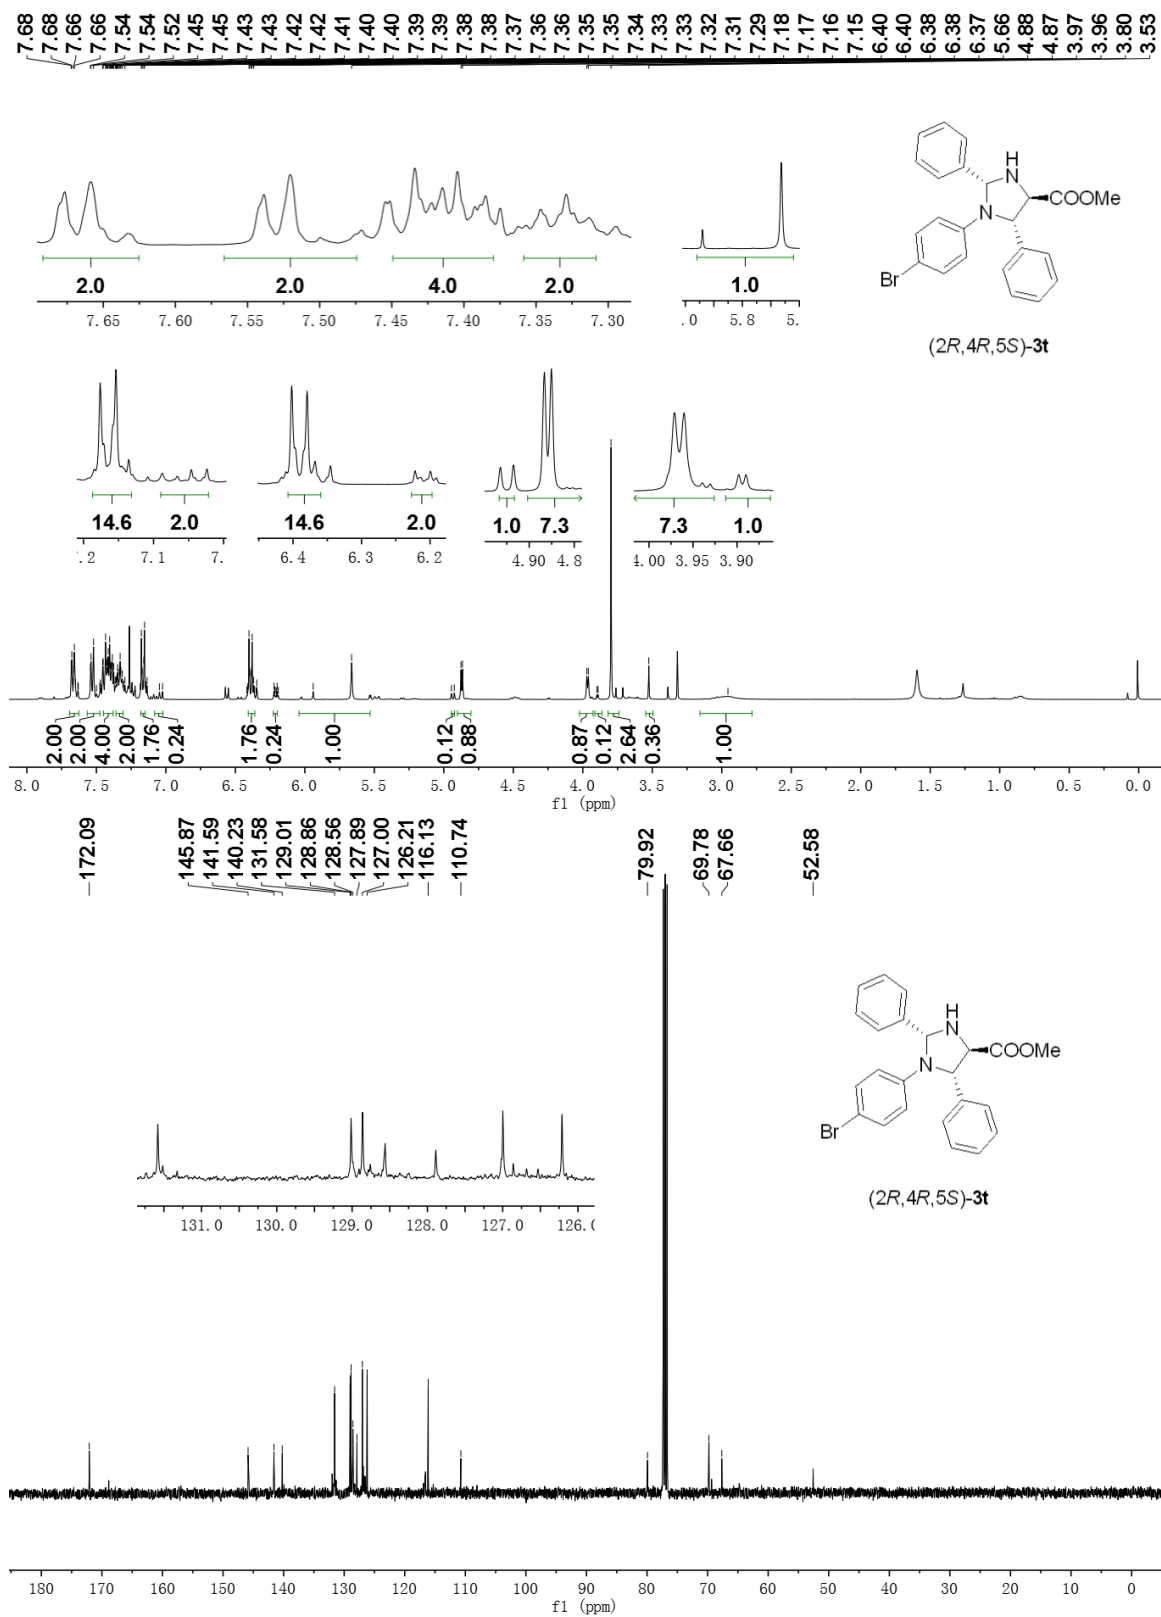



$^1\text{H}$  NMR and  $^{13}\text{C}\{^1\text{H}\}$  NMR spectra of compound of **3u** (procedure A) in  $\text{CDCl}_3$

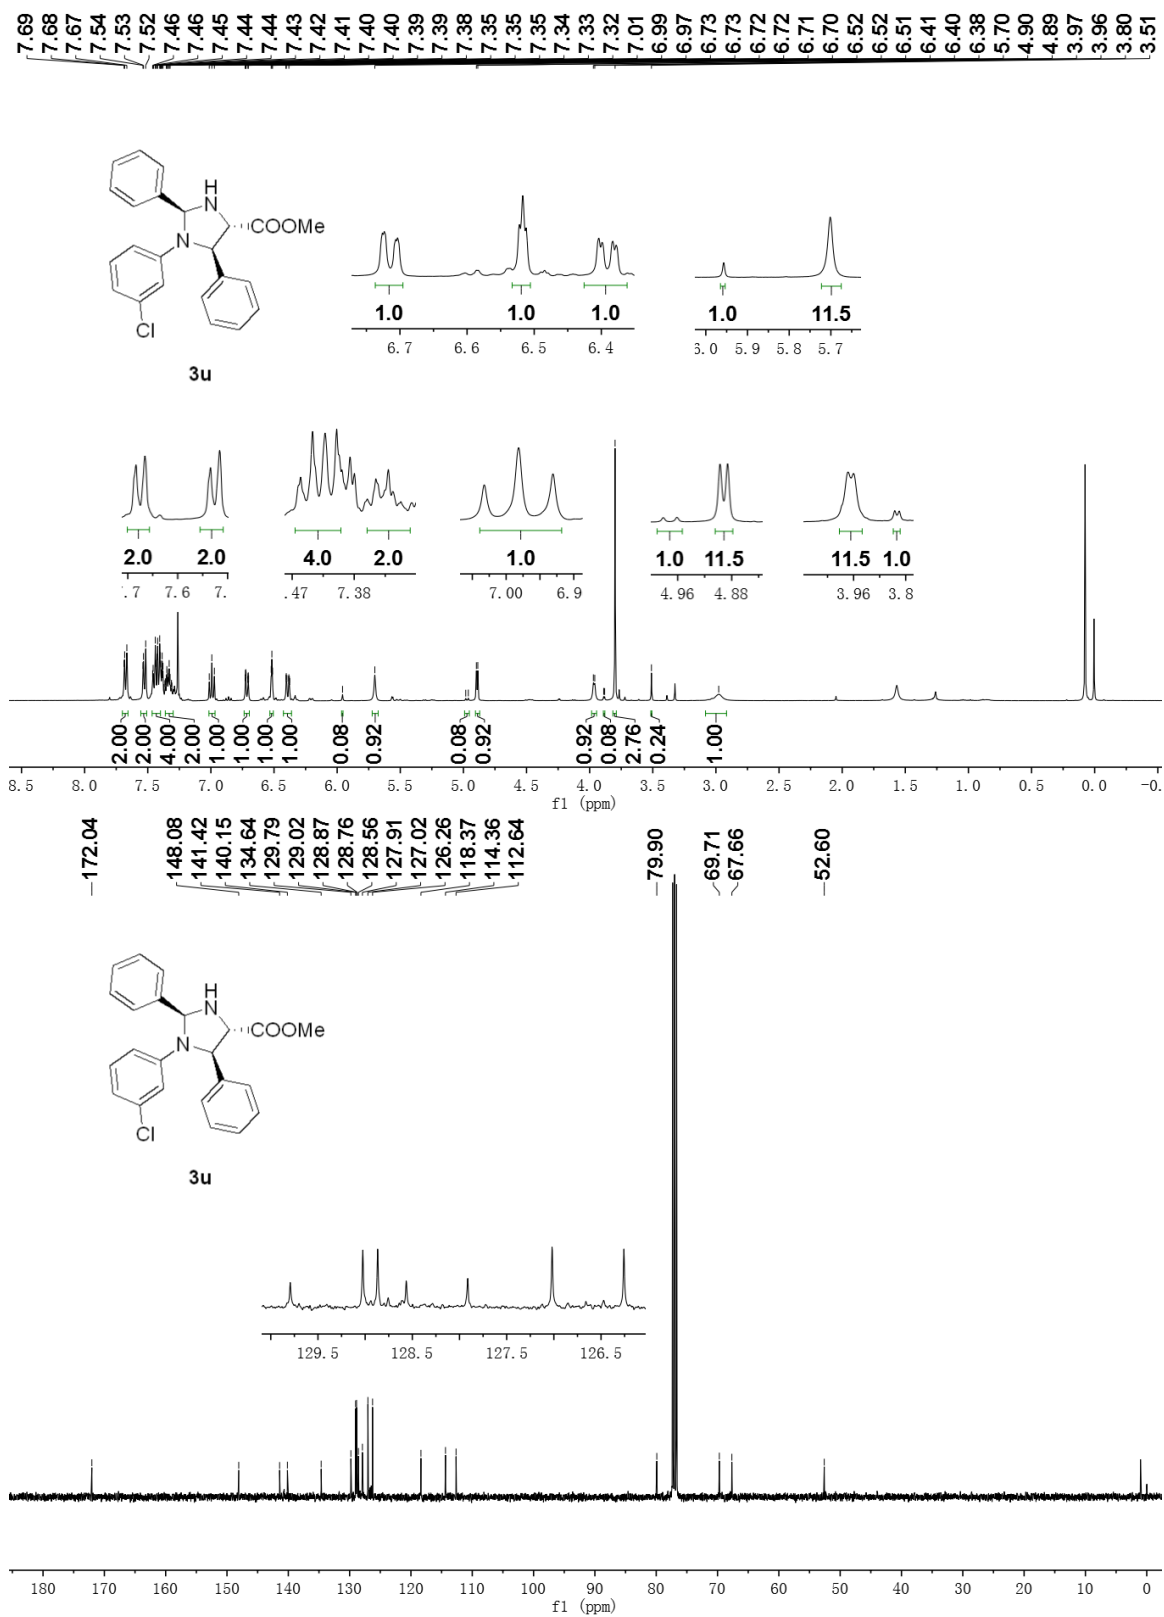

$^1\text{H}$  NMR and  $^{13}\text{C}\{^1\text{H}\}$  NMR spectra of compound of **3v** (procedure B) in  $\text{CDCl}_3$

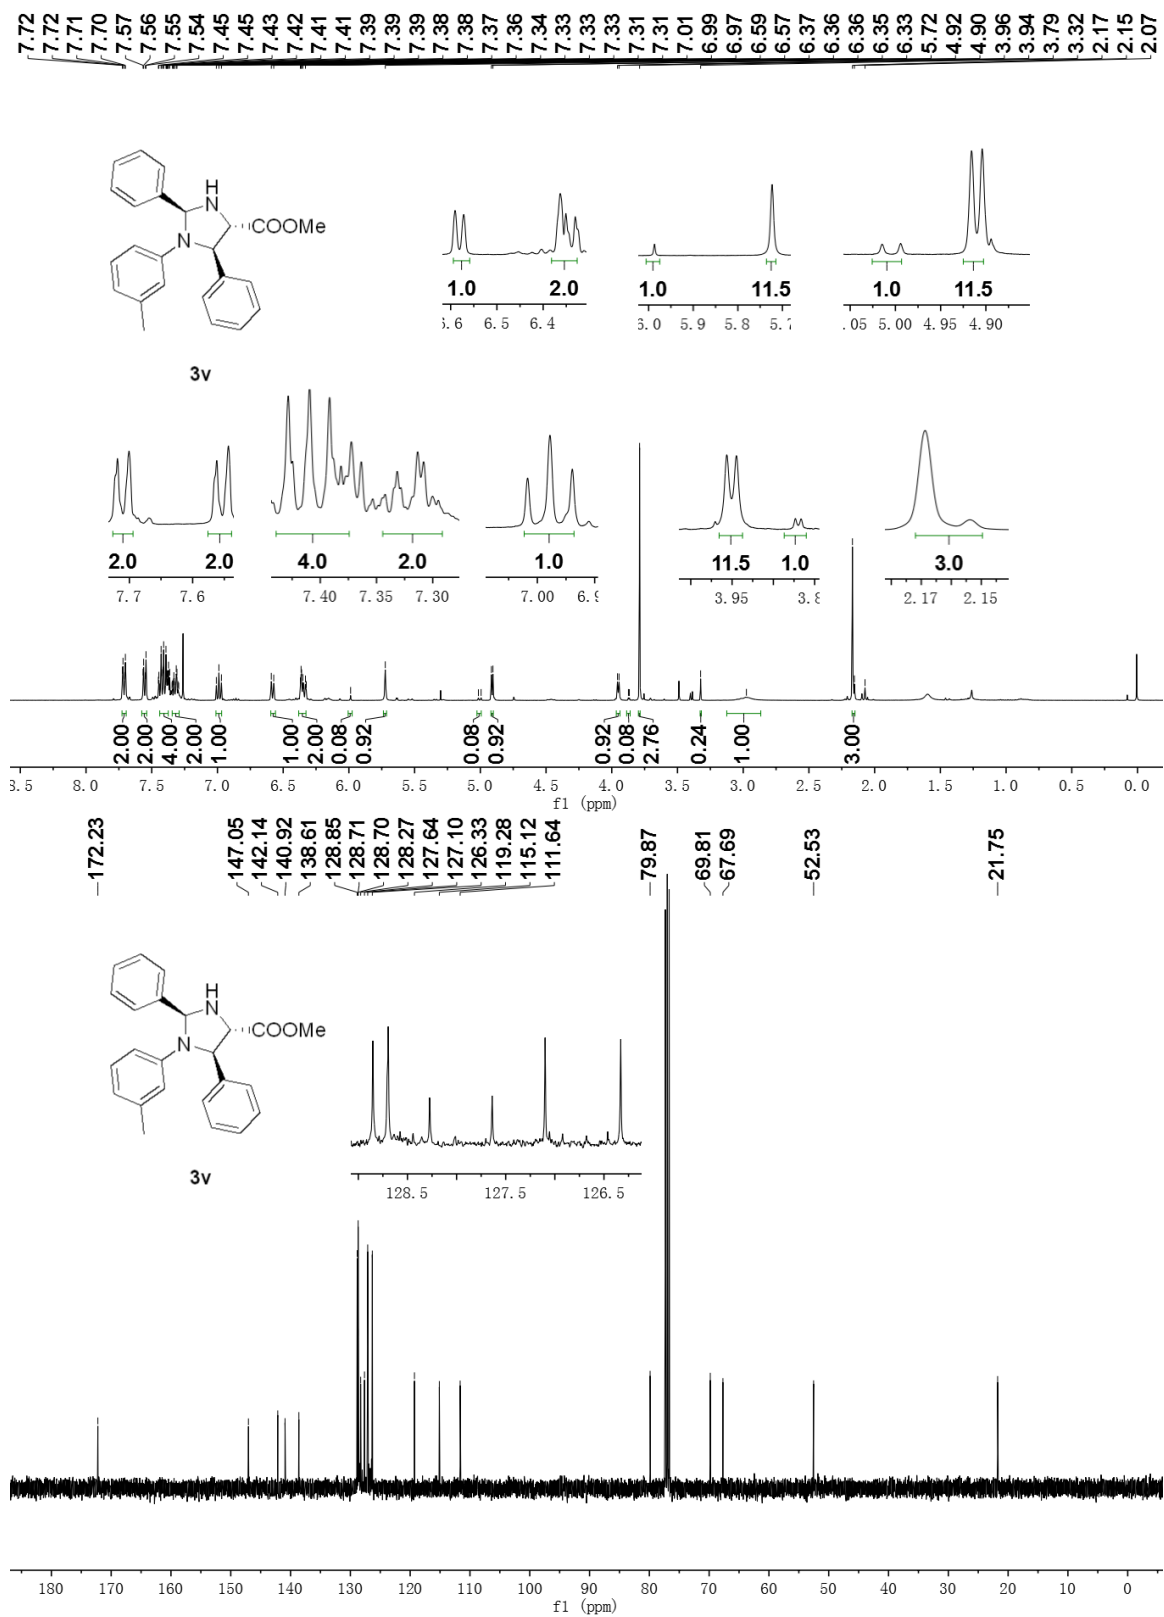

$^1\text{H}$  NMR and  $^{13}\text{C}\{^1\text{H}\}$  NMR spectra of compound of **3da** (procedure A) in  $\text{CDCl}_3$

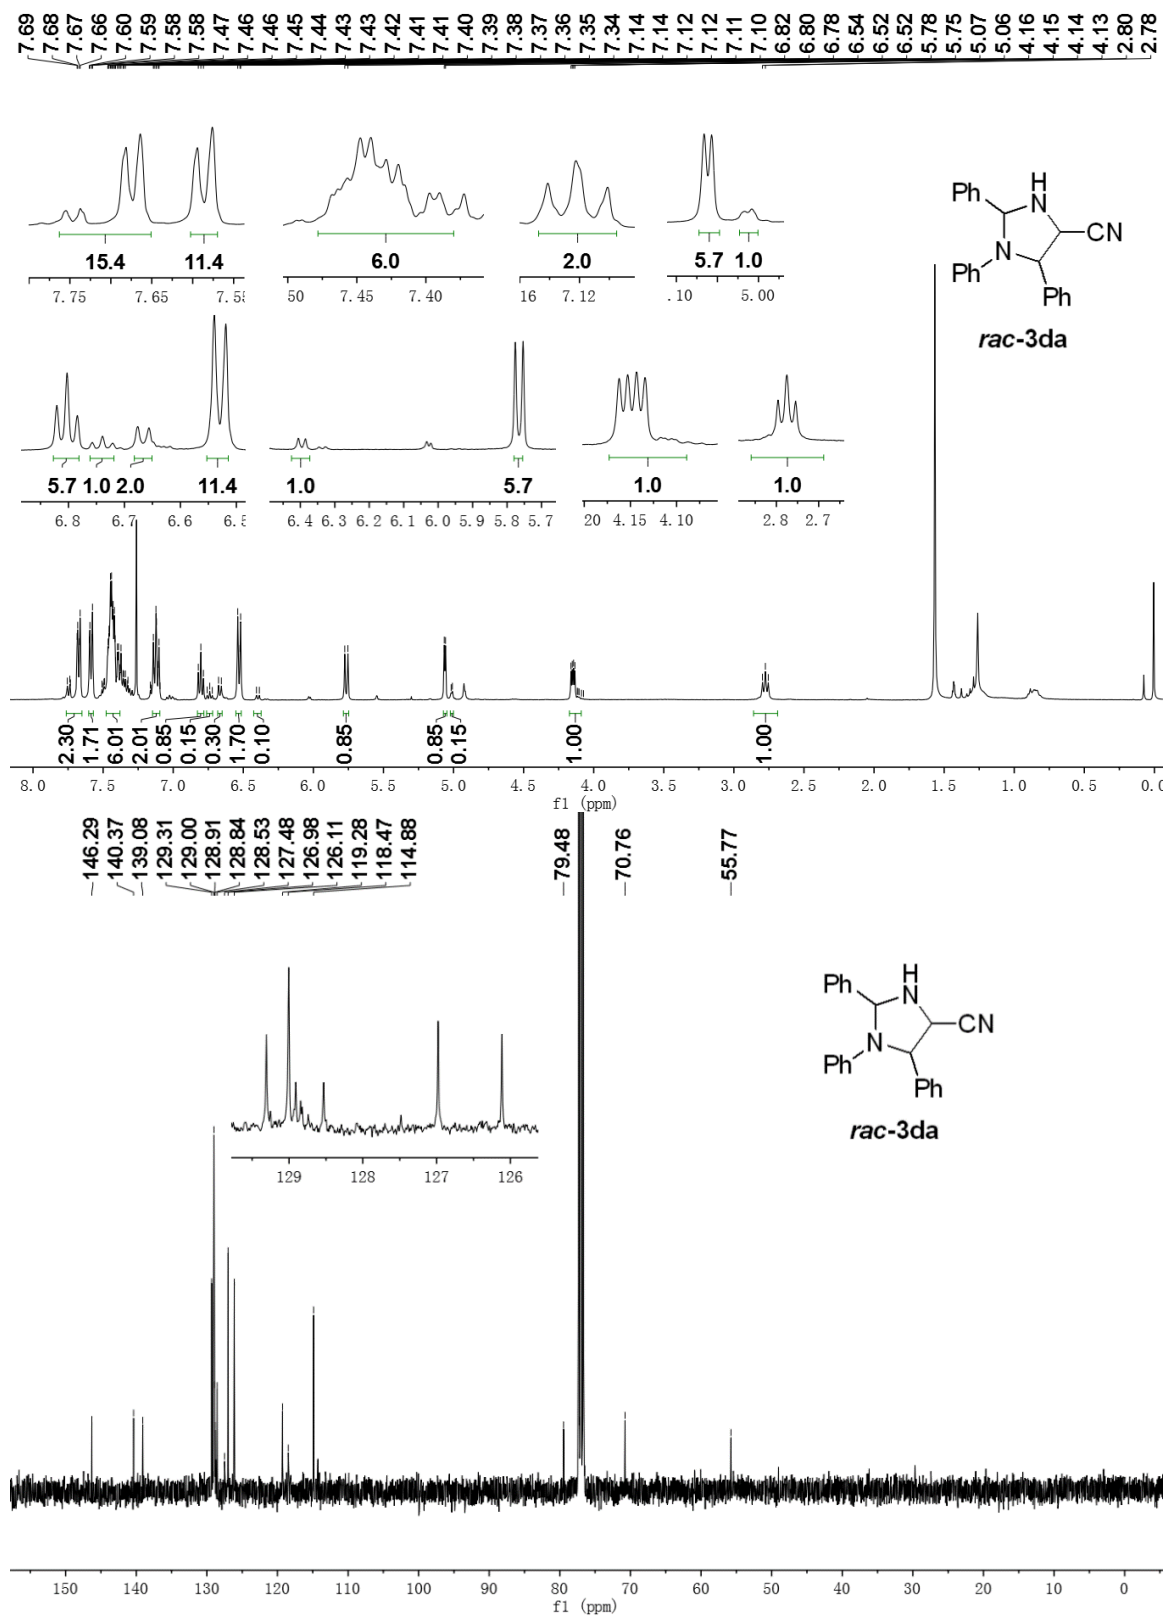

$^1\text{H}$  NMR and  $^{13}\text{C}\{^1\text{H}\}$  NMR spectra of compound of **3ala** (procedure A) in  $\text{CDCl}_3$

7.68  
7.67  
7.66  
7.66  
7.65  
7.50  
7.49  
7.48  
7.48  
7.47  
7.46  
7.44  
7.44  
7.43  
7.42  
7.41  
7.41  
7.40  
7.39  
7.34  
7.32  
7.30  
7.30  
7.29  
7.29  
7.28  
7.27  
7.26  
7.10  
7.08  
7.08  
7.06  
7.06  
6.73  
6.50  
6.49  
6.48  
6.47  
5.59  
4.65  
3.69  
3.55  
3.53  
1.66  
0.92  
0.91  
0.89

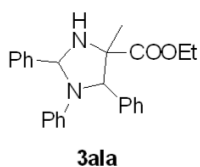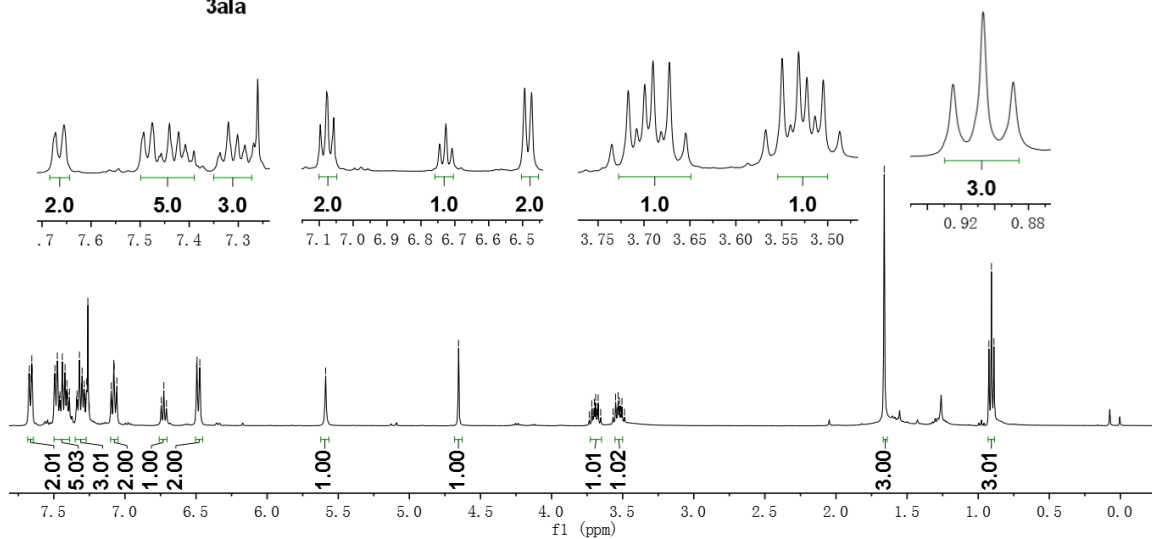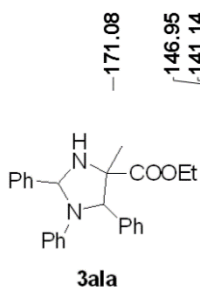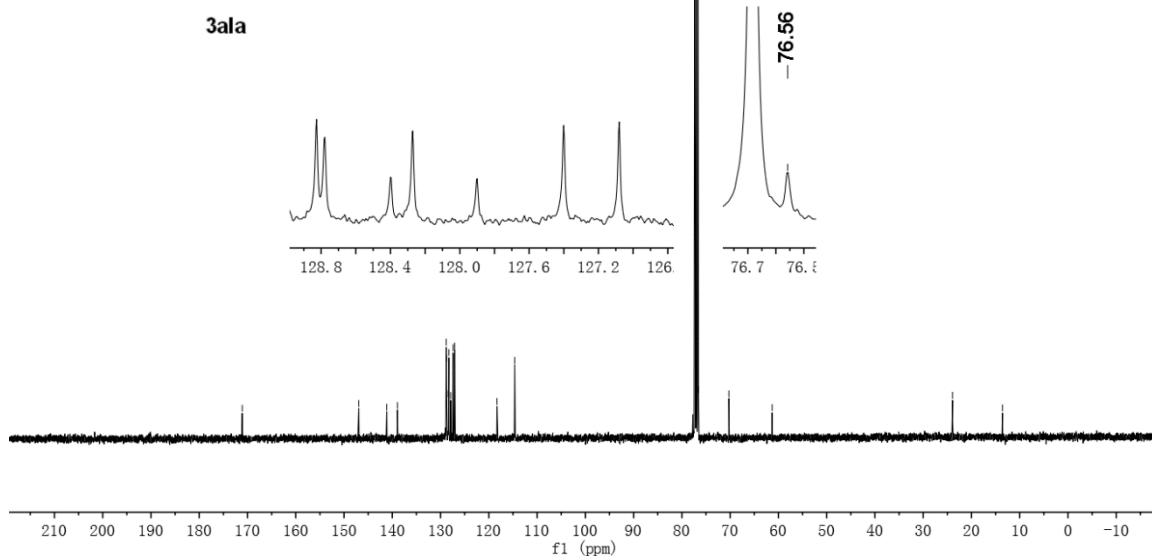

$^1\text{H}$  NMR and  $^{13}\text{C}\{^1\text{H}\}$  NMR spectra of compound of **3ser** (procedure A) in  $\text{CDCl}_3$

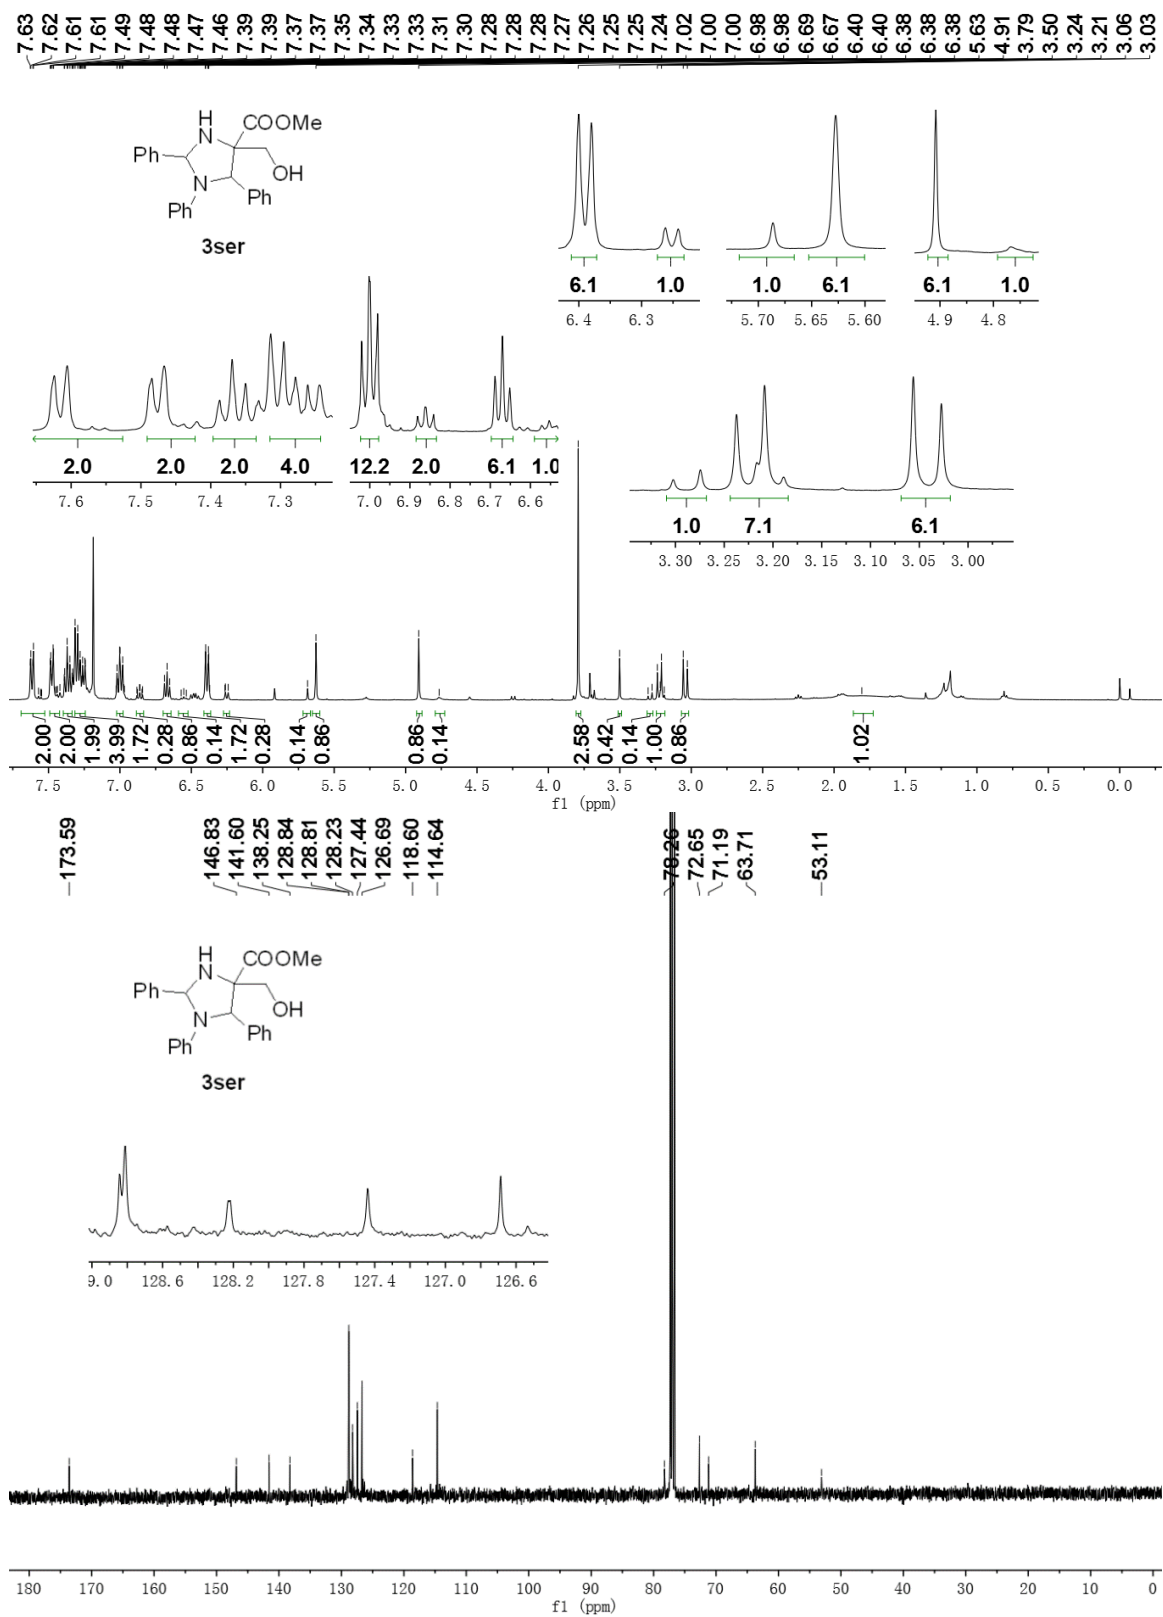

$^1\text{H}$  NMR and  $^{13}\text{C}\{^1\text{H}\}$  NMR spectra of compound of **3asp** (procedure A) in  $\text{CDCl}_3$

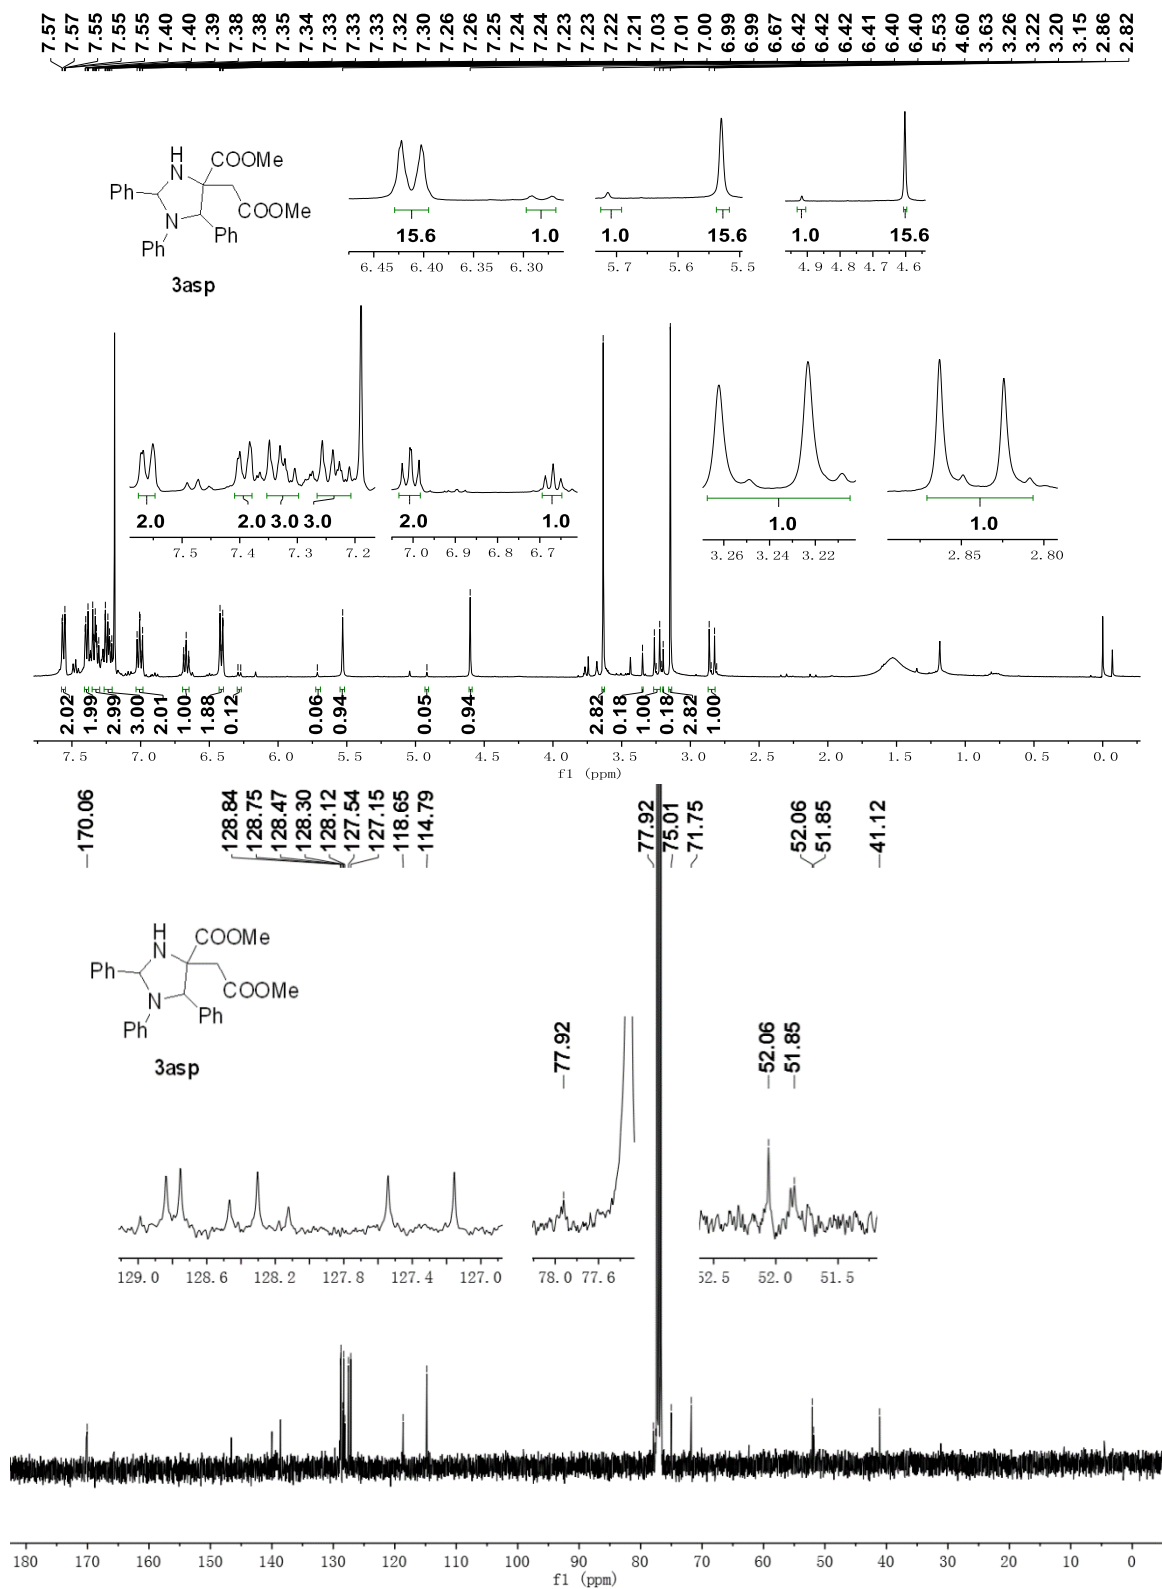

(O) Copies of CD Spectra in CH<sub>2</sub>Cl<sub>2</sub>

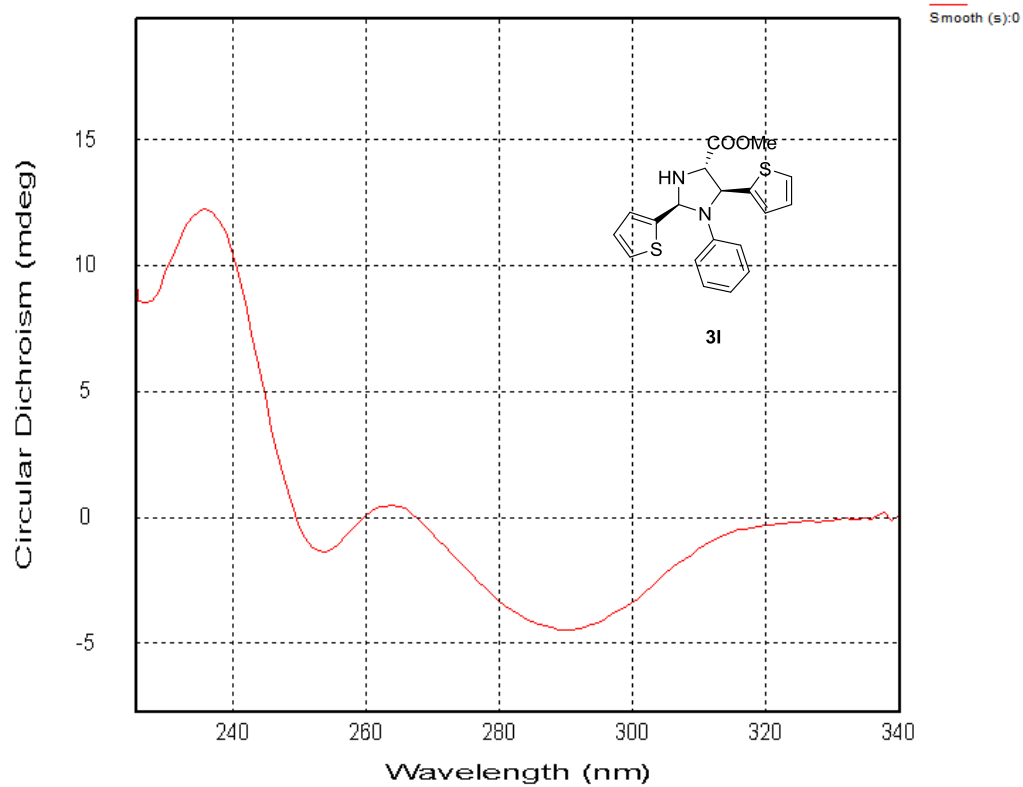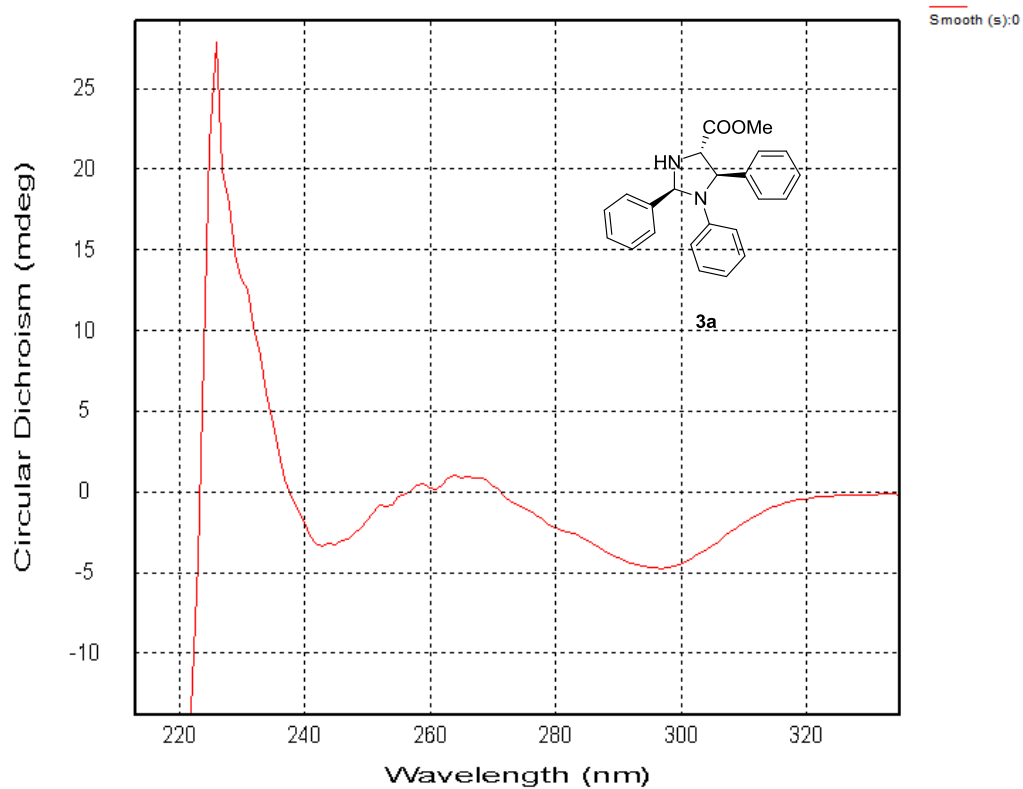

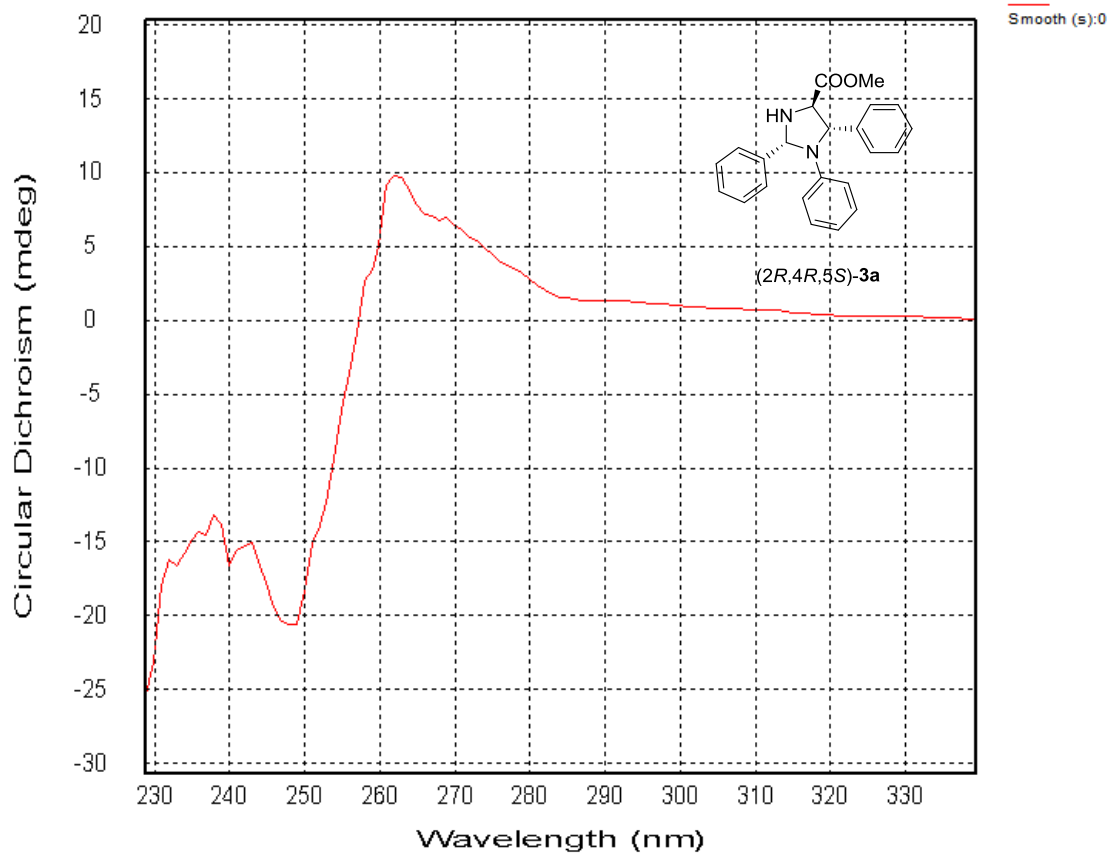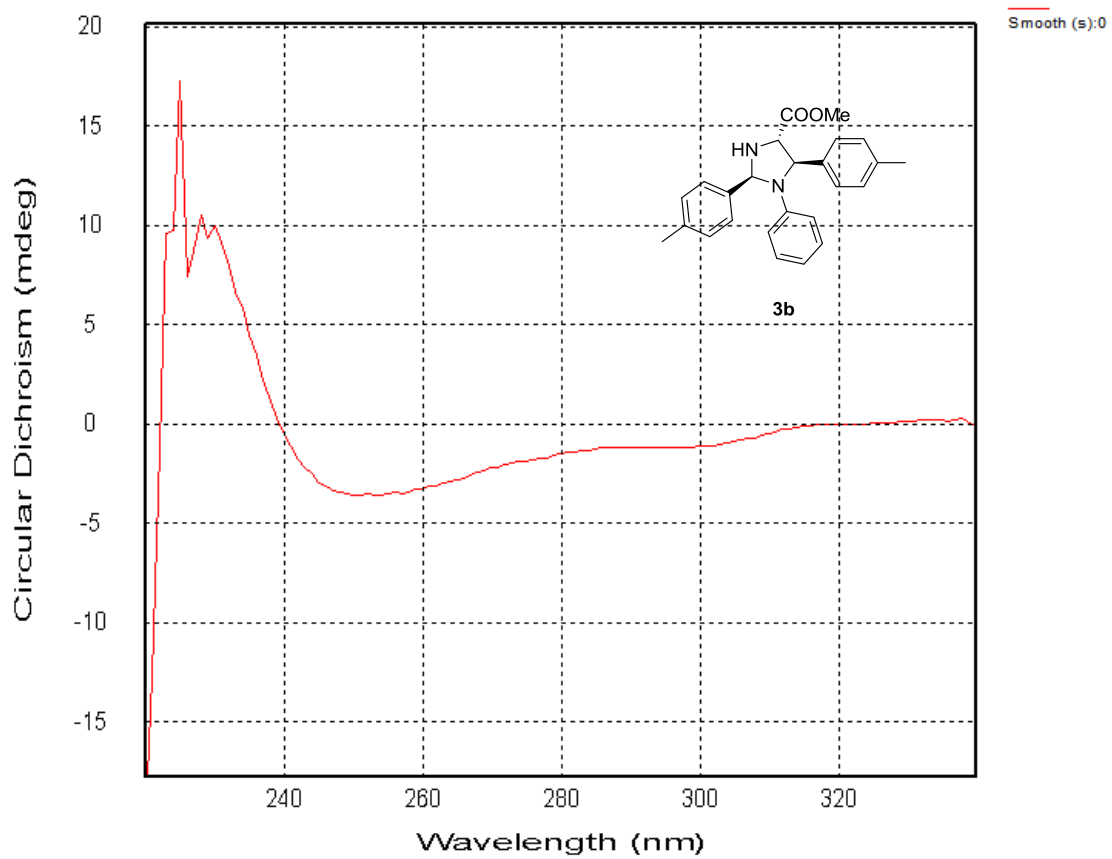



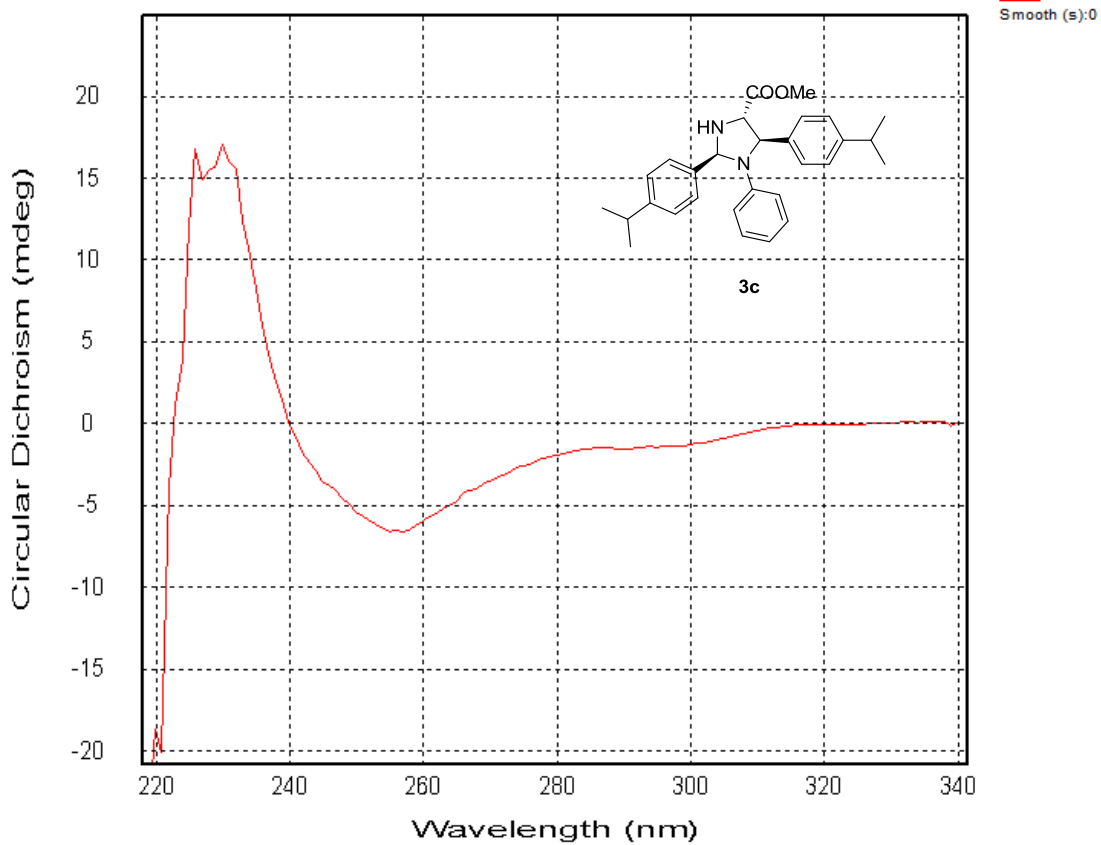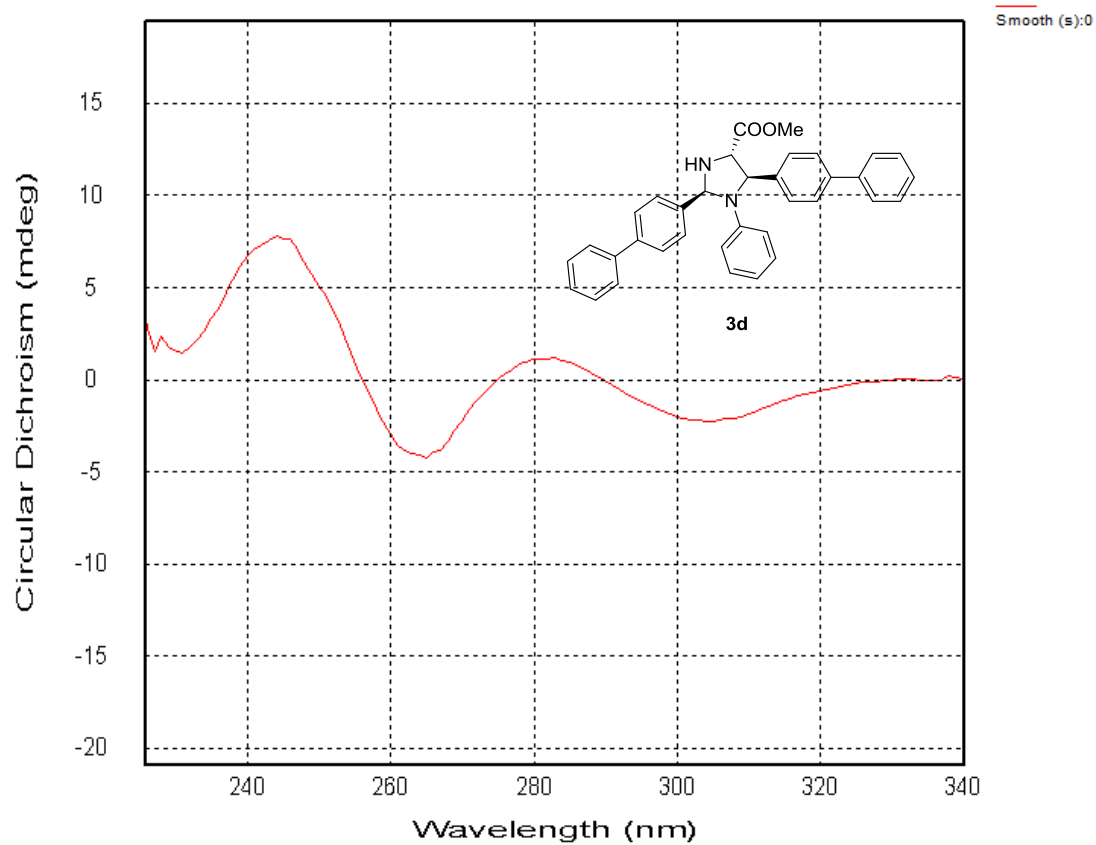

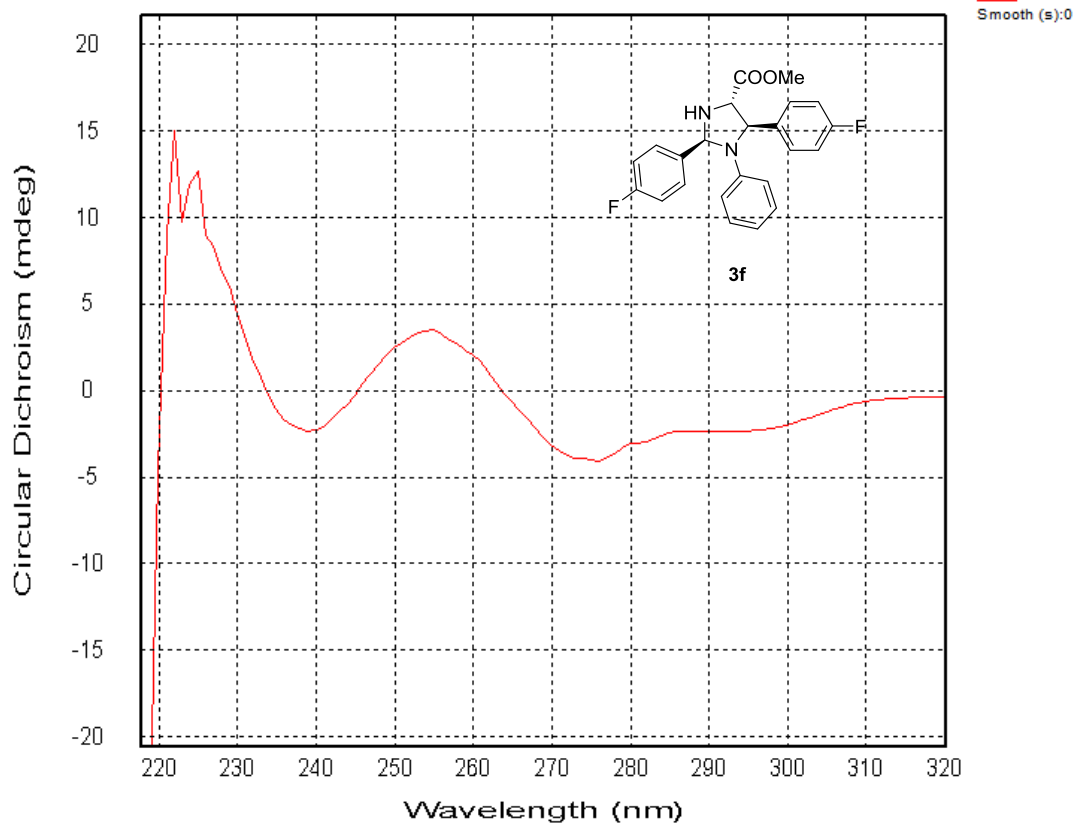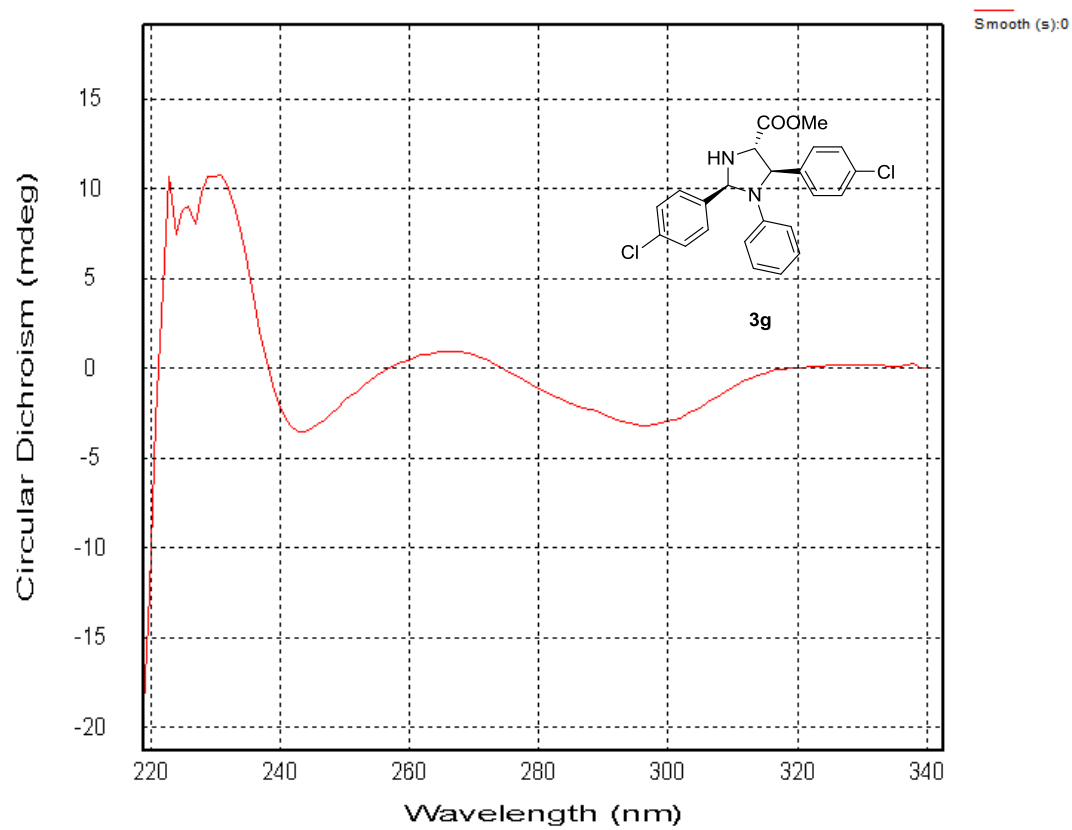

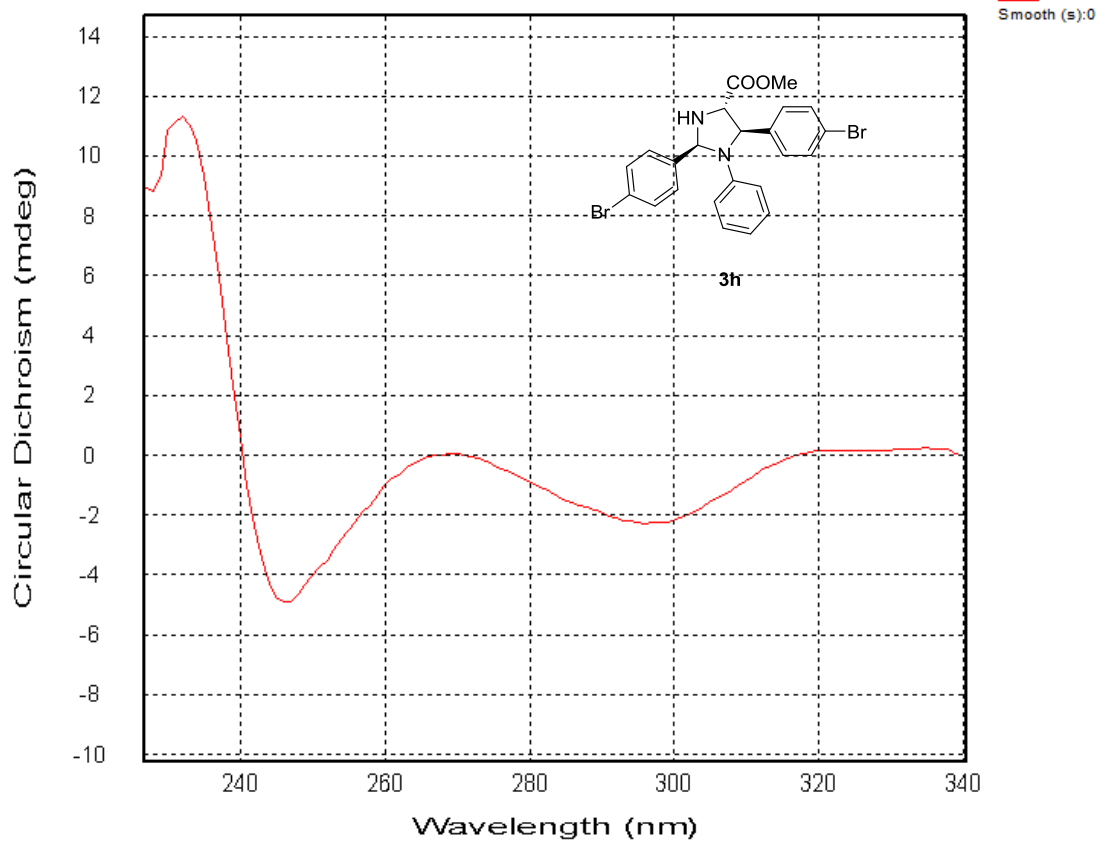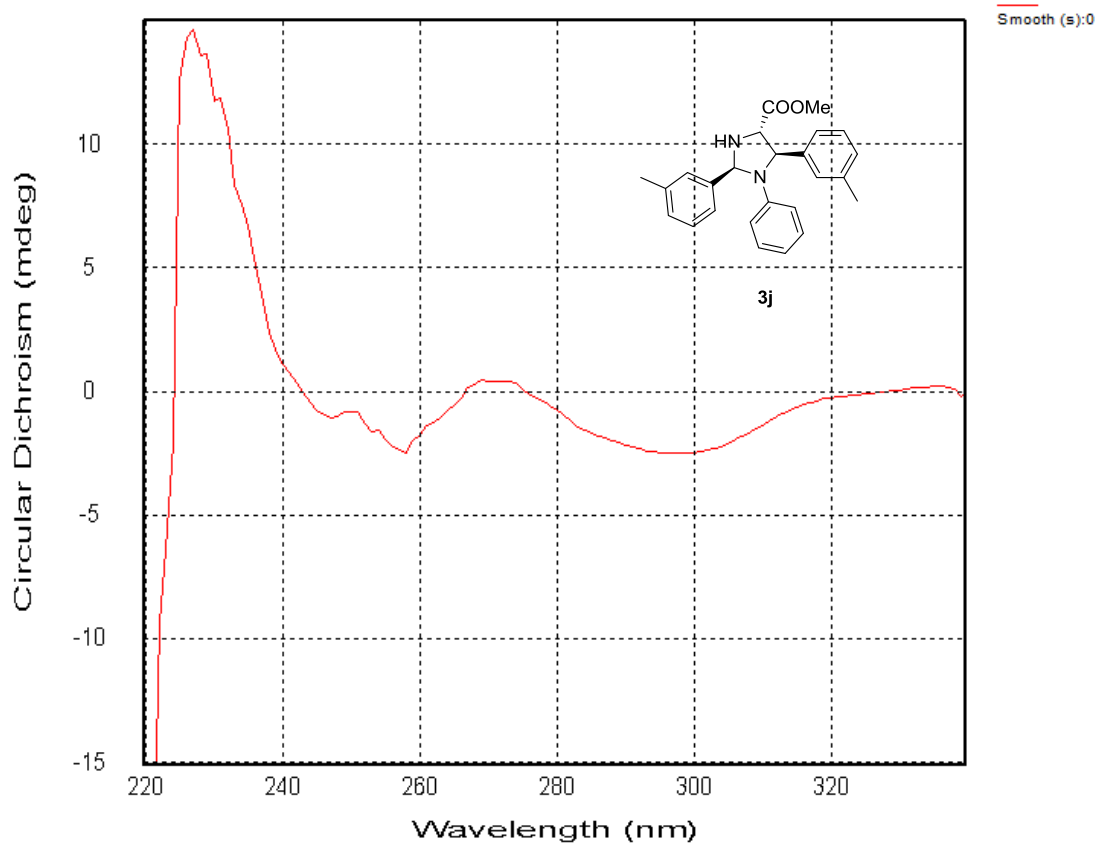

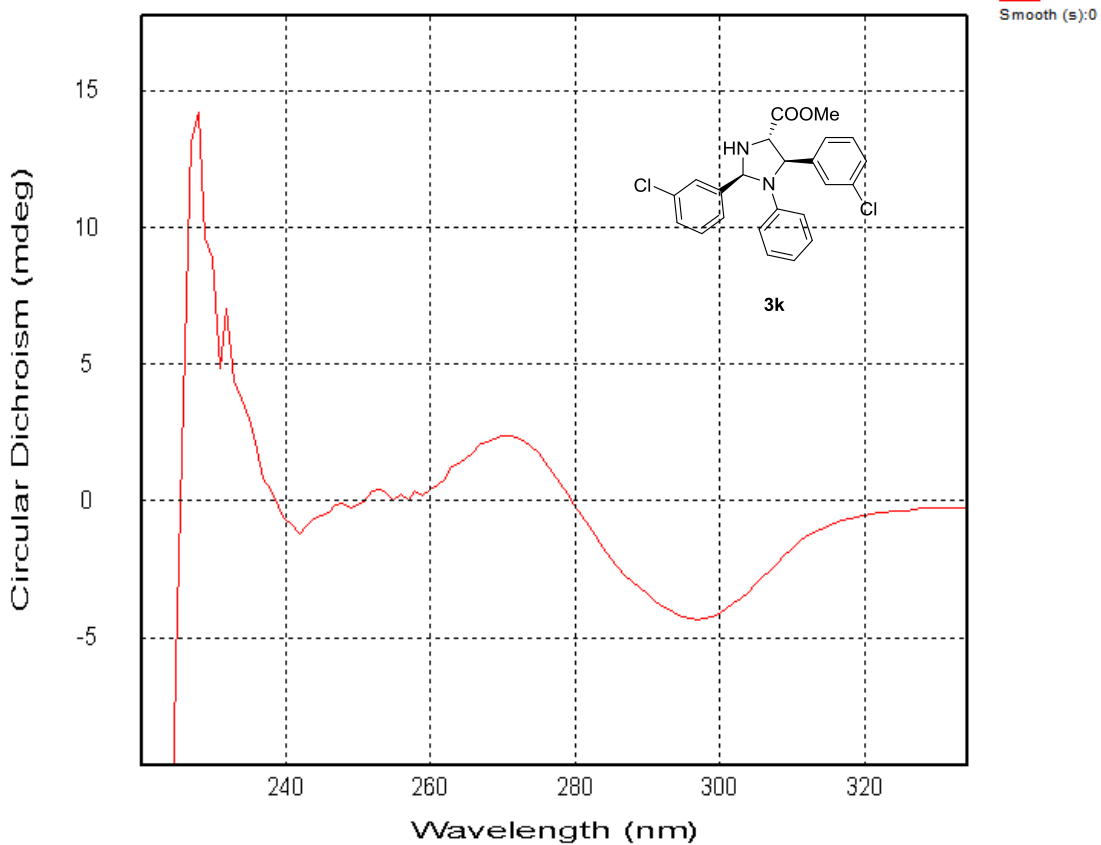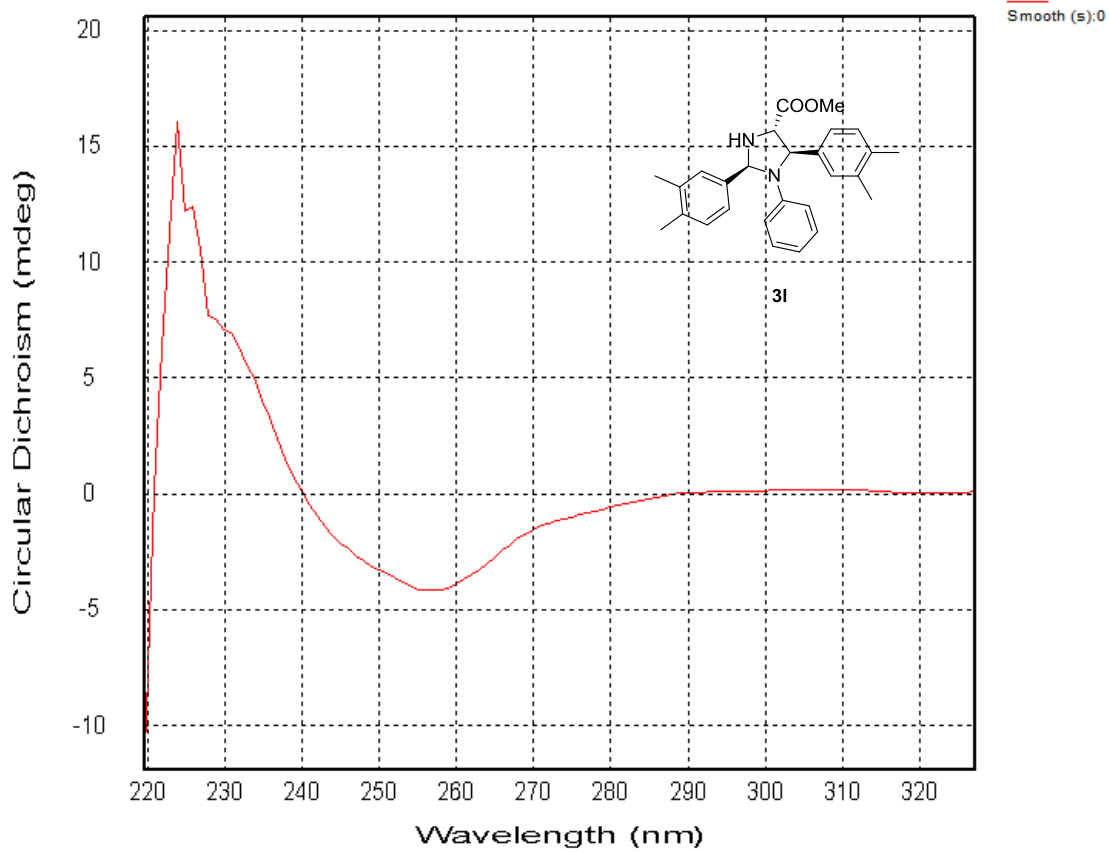

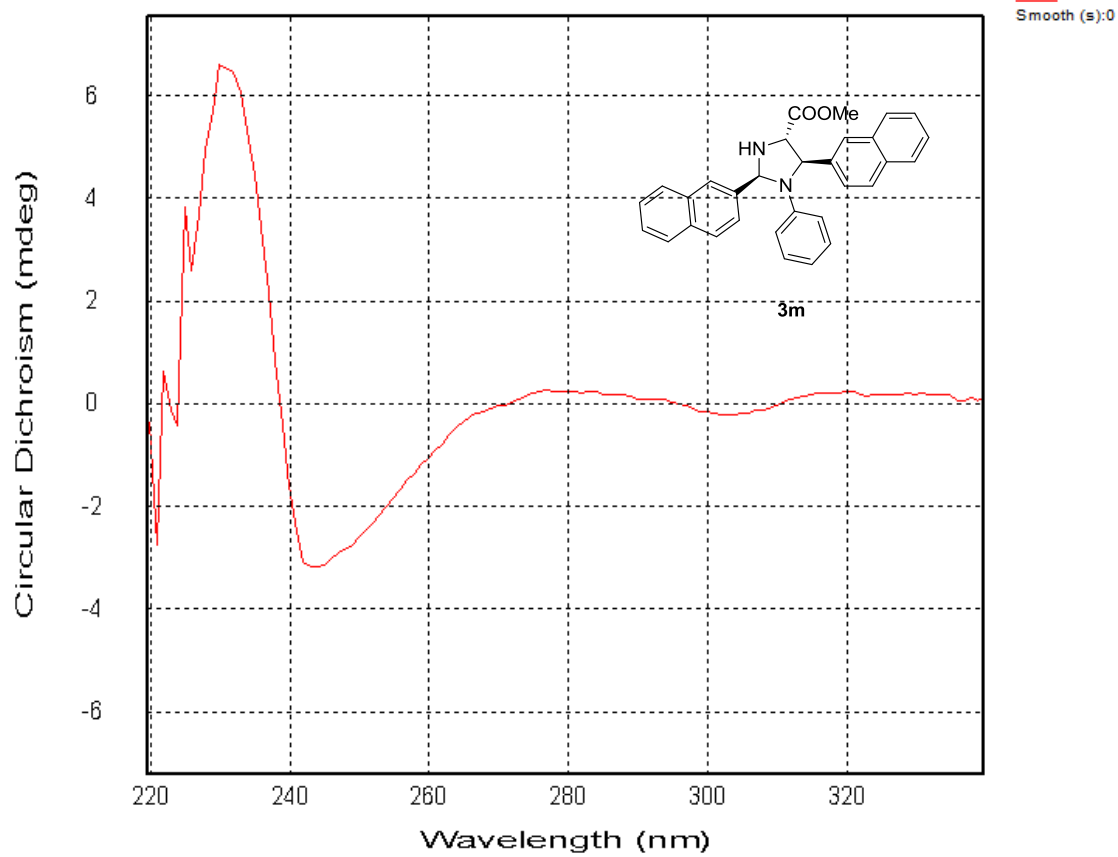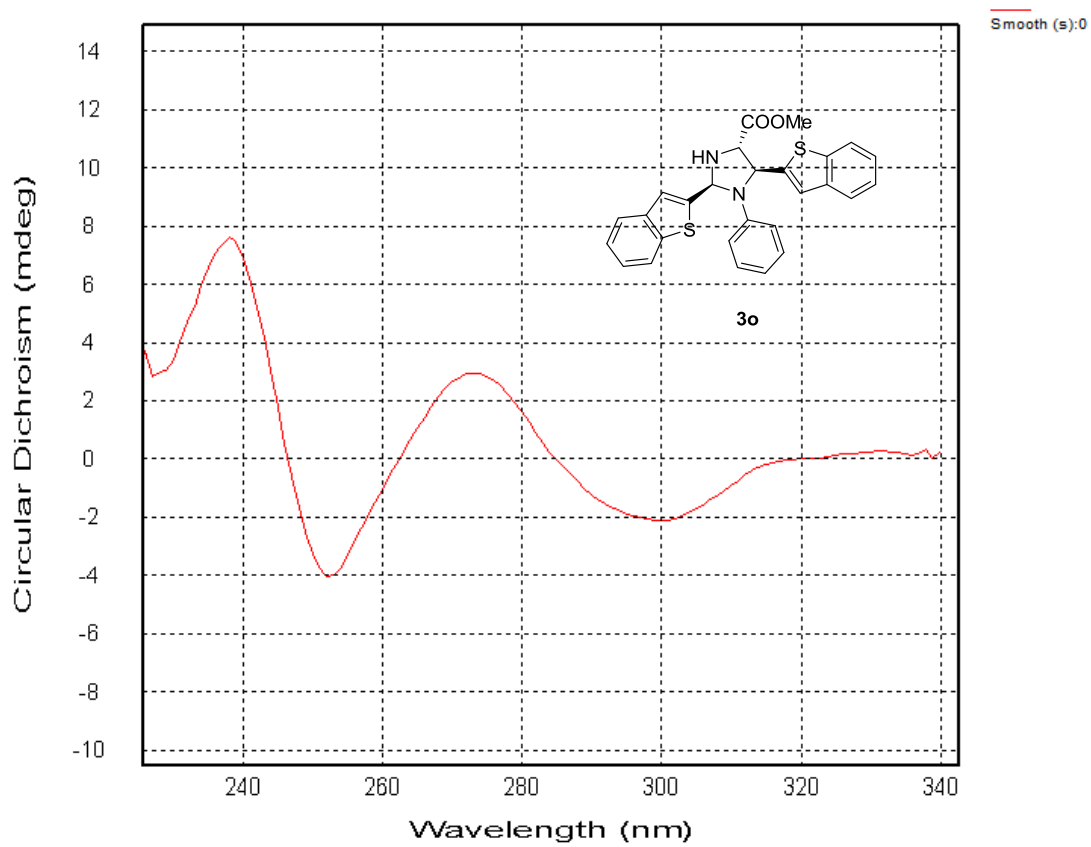

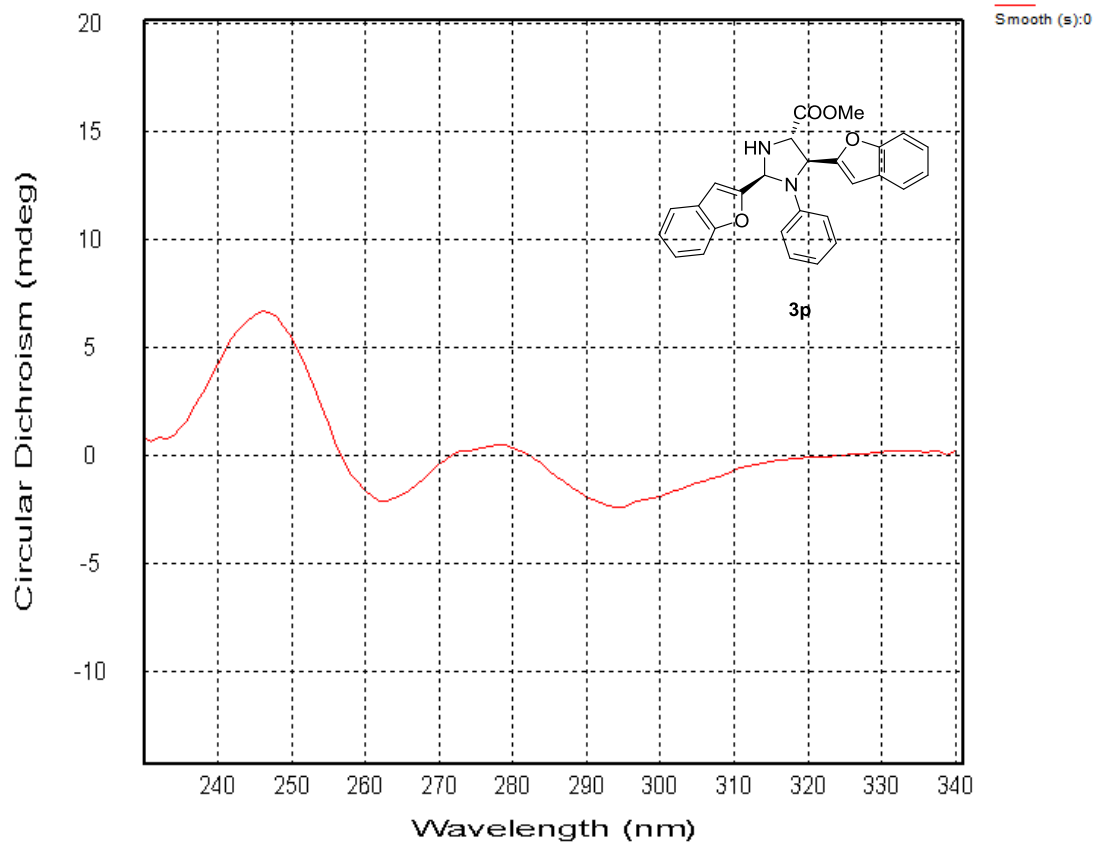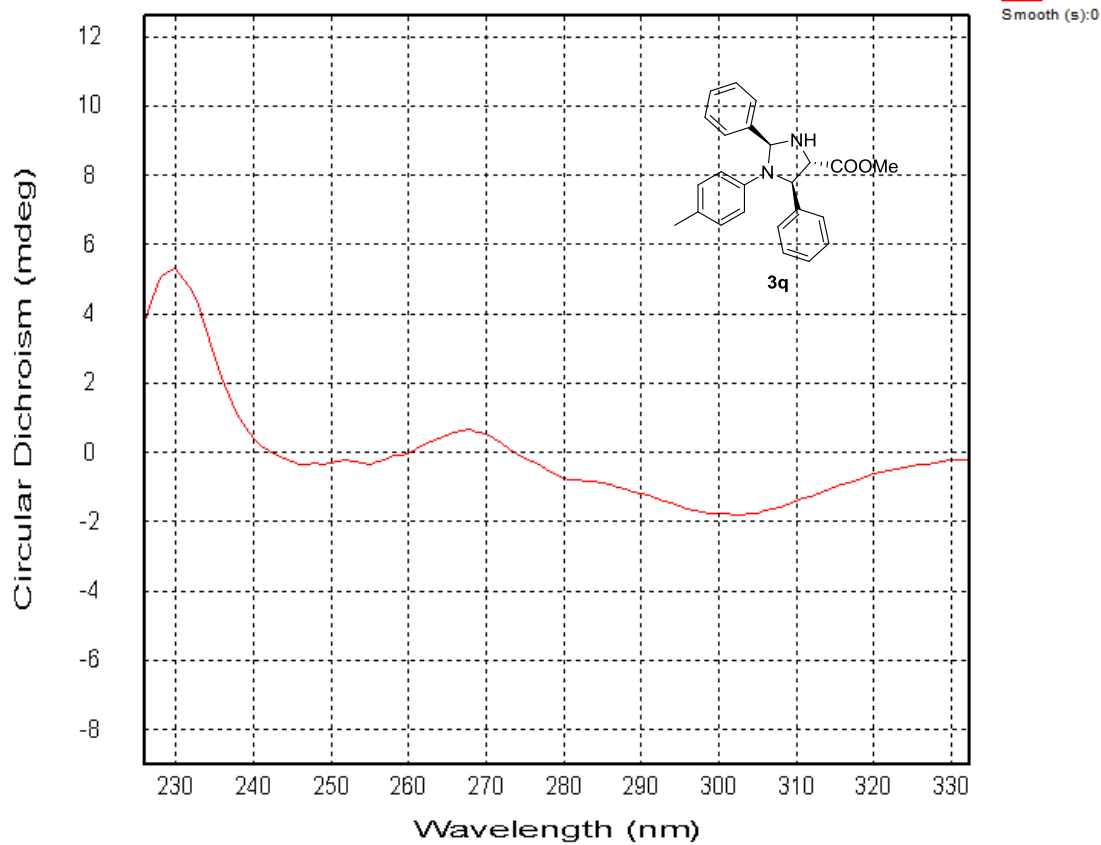

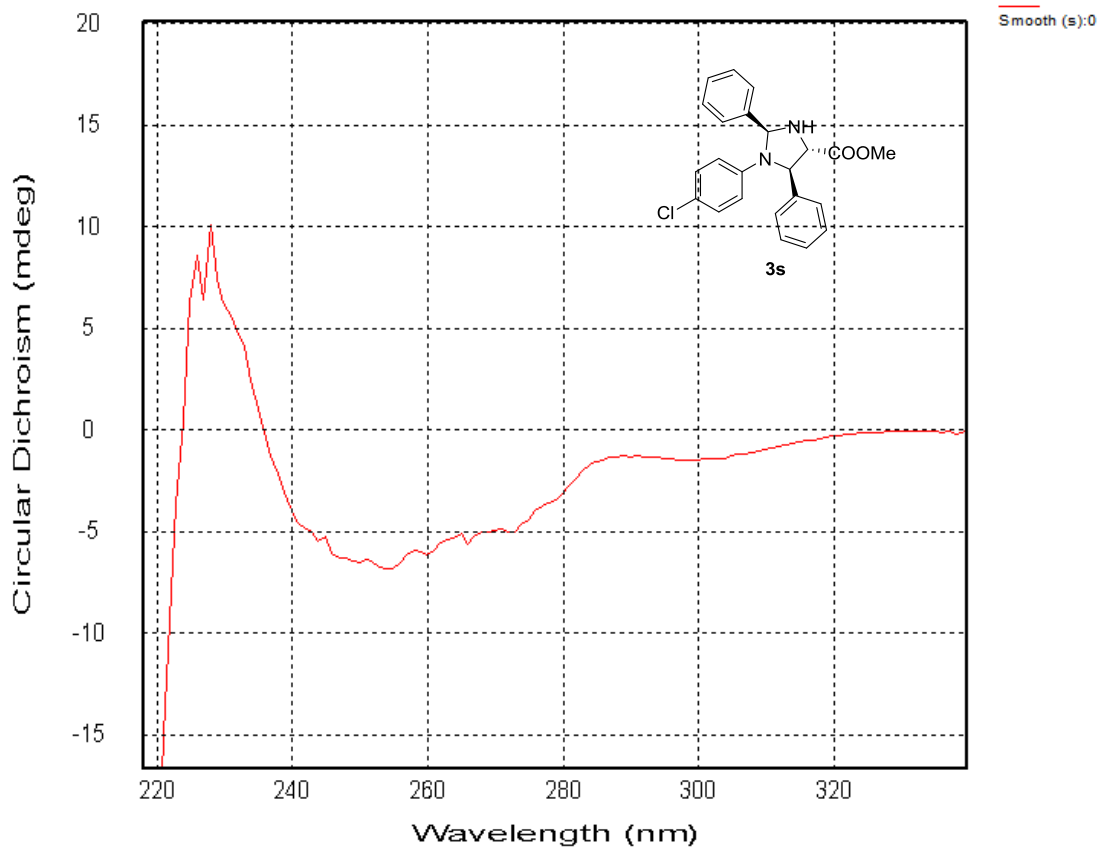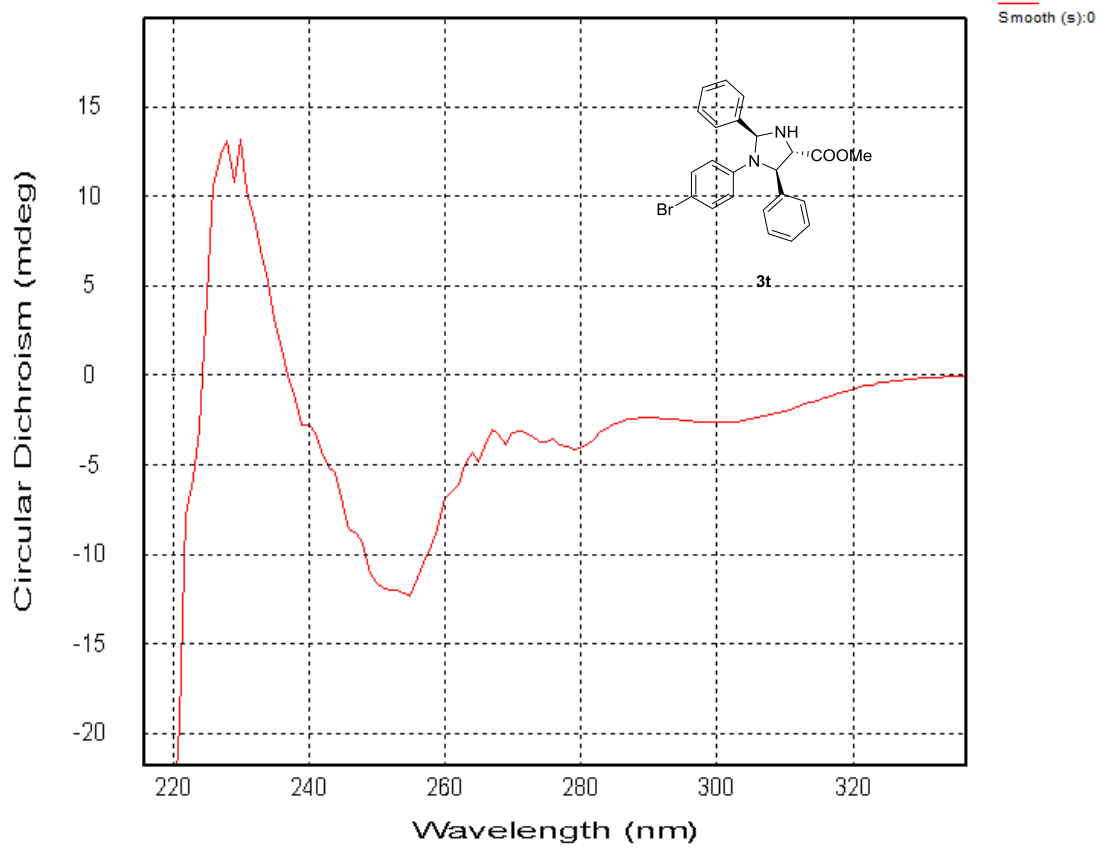

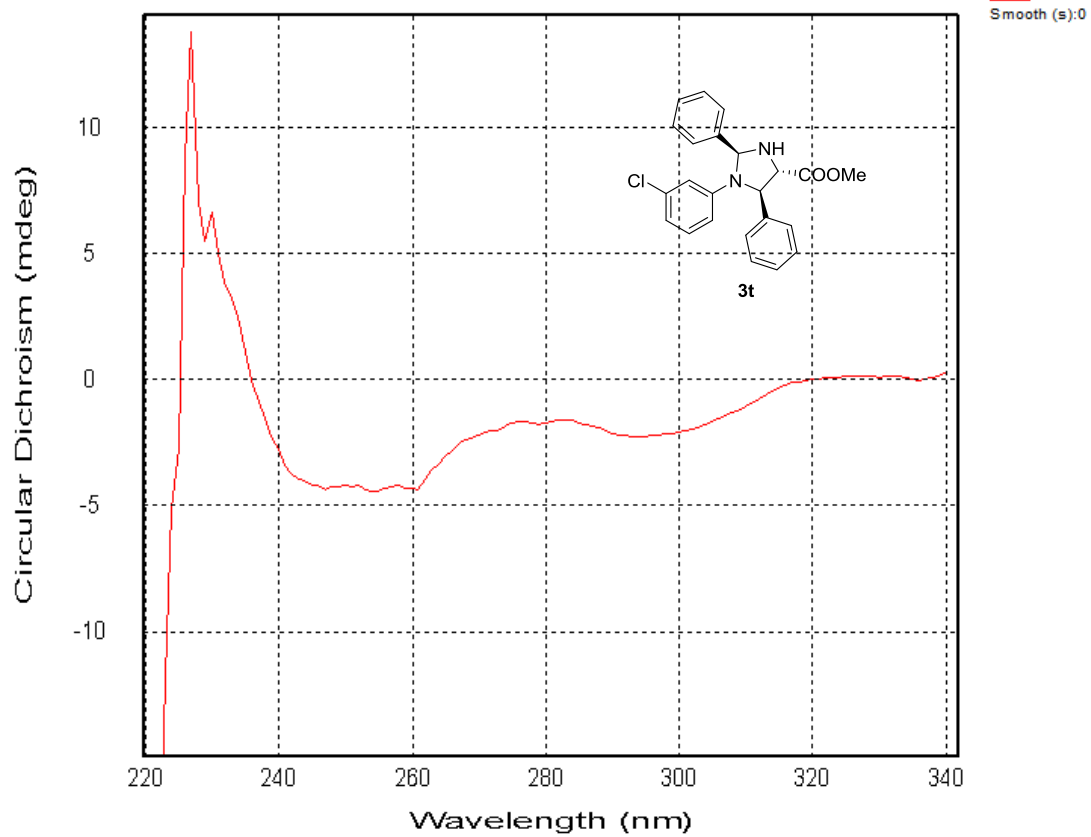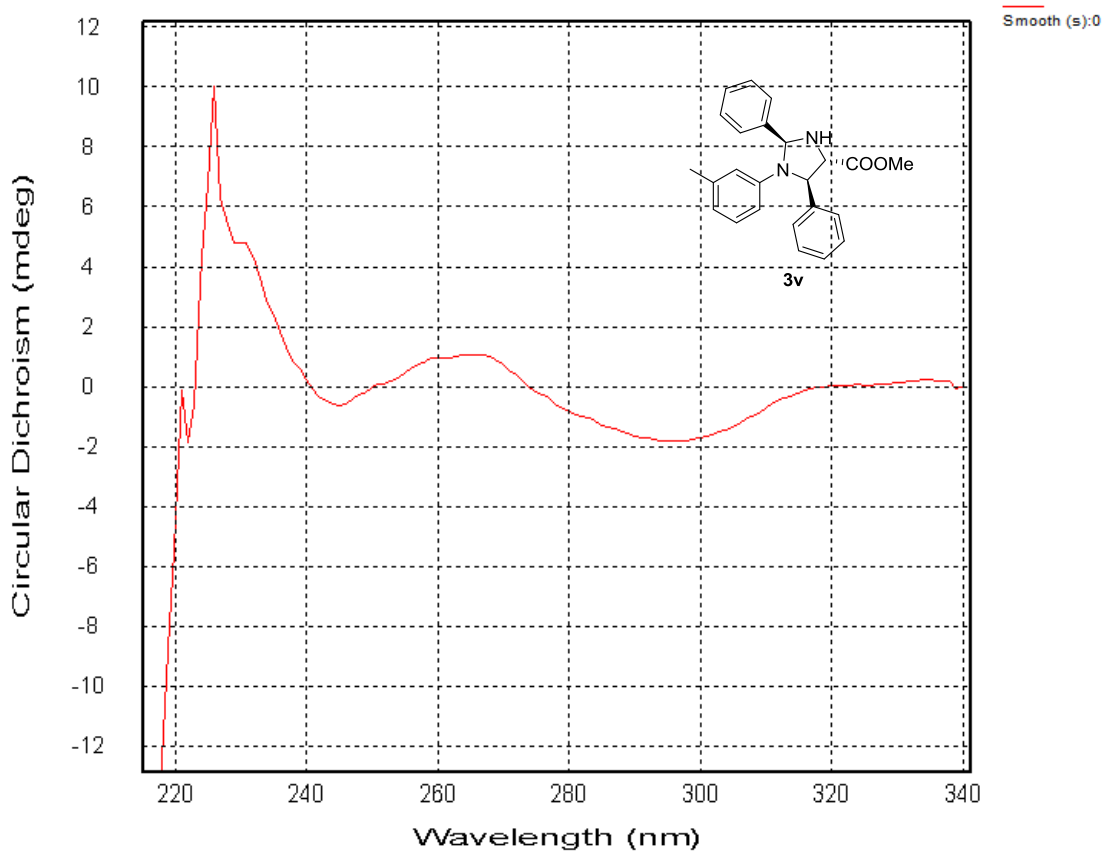

Supplement: d0sc07052a1.pdf [file d0sc07052a1.pdf]
